# Supplementary material for: Propellanes as Rigid Scaffolds for the Stereodefined Attachment of σ-Pharmacophoric Structural Elements to Achieve σ Affinity
Source: MDPI journal article supplement (doi:10.3390/ijms22115685), 2021-05-26

**Supplementary Materials****Propellanes as rigid scaffolds for the stereodefined attachment of  
 $\sigma$ -pharmacophoric structural elements to achieve  $\sigma$  affinity**

Héctor Torres-Gómez,<sup>a</sup> Constantin Daniliuc,<sup>b</sup> Dirk Schepmann,<sup>a</sup> Erik Laurini,<sup>c</sup> Sabrina Prigl,<sup>c,d</sup> Bernhard Wünsch<sup>a,e\*</sup>

<sup>a</sup> Institut für Pharmazeutische und Medizinische Chemie der Westfälischen Wilhelms-Universität Münster, Corrensstraße 48, D-48149 Münster, Germany

Tel.: +49-251-8333311; Fax: +49-251-8332144; E-mail: [wuensch@uni-muenster.de](mailto:wuensch@uni-muenster.de)

<sup>b</sup> Organisch-Chemisches Institut der Westfälischen Wilhelms-Universität Münster, Corrensstraße 40, D-48149 Münster, Germany

<sup>c</sup> Molecular Biology and Nanotechnology Laboratory (MolBNL@UniTS), DEA, University of Trieste, 34127 Trieste, Italy

<sup>d</sup> Department of General Biophysics, Faculty of Biology and Environmental Protection, University of Lodz, Lodz, Poland

<sup>e</sup> GRK 2515, Chemical biology of ion channels (Chembion), Westfälische Wilhelms-Universität Münster, Germany.

| Content                                                                | page |
|------------------------------------------------------------------------|------|
| 1. Purity data of prepared compounds                                   | S2   |
| 2. Receptor binding studies                                            | S4   |
| 3. Crystallography section                                             | S8   |
| 4. Molecular Dynamics study to determine the binding mode of <b>18</b> | S77  |
| 5. NMR spectra                                                         | S78  |
| 6. HPLC traces of selected compounds                                   | S135 |

**1. Purity data of prepared compounds**

## Purity by HPLC

| compound                 | purity |
|--------------------------|--------|
| <i>anti-7</i>            | 96 %   |
| <i>syn-7</i>             | 96%    |
| <b>8-<i>anti-4b</i></b>  | 96 %   |
| <b>8-<i>anti-4c</i></b>  | 93 %   |
| <b>8-<i>anti-4d</i></b>  | 89 %   |
| <b>8-<i>anti-4e</i></b>  | 91 %   |
| <b>8-<i>anti-4f</i></b>  | 92 %   |
| <b>8-<i>anti-4g</i></b>  | 98 %   |
| <b>8-<i>anti-4h</i></b>  | 98 %   |
| <b>8-<i>anti-4i</i></b>  | 91 %   |
| <b>8-<i>syn-4i</i></b>   | 98 %   |
| <b>8-<i>anti-4k</i></b>  | 66 %   |
| <b>8-<i>syn-4k</i></b>   | 97 %   |
| <b>8-<i>anti-4l</i></b>  | 98 %   |
| <b>8-<i>anti-4m</i></b>  | 96 %   |
| <b>8-<i>anti-4n</i></b>  | 95 %   |
| <b>8-<i>anti-4o</i></b>  | 98 %   |
| <b>8-<i>anti-4p</i></b>  | 97 %   |
| <b>8-<i>anti-4q</i></b>  | 98 %   |
| <b>8-<i>anti-4r</i></b>  | 92 %   |
| <b>8-<i>anti-4s</i></b>  | 93 %   |
| <b>8-<i>anti-4t</i></b>  | 94 %   |
| <b>8-<i>anti-4u</i></b>  | 96 %   |
| <b>11-<i>anti-13</i></b> | 94 %   |
| <b>11-<i>syn-13</i></b>  | 93 %   |
| <b><i>anti-14</i></b>    | 98 %   |
| <b><i>syn-14</i></b>     | 84 %   |

|                              |      |
|------------------------------|------|
| <b>15</b>                    | 97 % |
| <b>17</b>                    | 96 % |
| <b>18</b>                    | 97 % |
| <i>syn</i> - <b>20</b>       | 75 % |
| <i>anti</i> - <b>20</b>      | 74 % |
| <i>syn</i> - <b>21</b>       | 95 % |
| <i>anti</i> - <b>21</b>      | 81 % |
| <i>syn,anti</i> - <b>22</b>  | 95 % |
| <i>syn,syn</i> - <b>22</b>   | 97 % |
| <i>anti,anti</i> - <b>22</b> | 96 % |
| <i>anti,syn</i> - <b>22</b>  | 94 % |
| <b>23a</b>                   | 97 % |
| <b>23b</b>                   | 98 % |
| <b>23c</b>                   | 94 % |
| <b>23d</b>                   | 98 % |
| <i>syn</i> - <b>25</b>       | 93 % |
| <i>anti</i> - <b>25</b>      | 99 % |
| <i>syn,anti</i> - <b>26</b>  | 99 % |
| <i>syn,syn</i> - <b>26</b>   | 99 % |
| <i>anti,anti</i> - <b>26</b> | 97 % |
| <i>anti,syn</i> - <b>26</b>  | 94 % |

## **2. Receptor binding studies**

### **2.1. Materials**

Guinea pig brains and rat livers were commercially available (Harlan-Winkelmann, Borcheln, Germany). Homogenizers: Elvehjem Potter (B. Braun Biotech International, Melsungen, Germany) and Soniprep® 150 (MSE, London, UK). Centrifuges: Cooling centrifuge model Eppendorf 5427R (Eppendorf, Hamburg, Germany) and High-speed cooling centrifuge model Sorvall® RC-5C plus (Thermo Fisher Scientific, Langenselbold, Germany). Multiplates: standard 96 well multiplates (Diagonal, Muenster, Germany). Shaker: self-made device with adjustable temperature and tumbling speed (scientific workshop of the institute). Harvester: MicroBeta® FilterMate 96 Harvester. Filter: Printed Filtermat Typ A and B. Scintillator: Meltilex® (Typ A or B) solid state scintillator. Scintillation analyzer: MicroBeta® Trilux (all Perkin Elmer LAS, Rodgau-Jügesheim, Germany).

### **2.2. Preparation of membrane homogenates from guinea pig brain**

5 guinea pig brains were homogenized with the potter (500-800 rpm, 10 up and down strokes) in 6 volumes of cold 0.32 M sucrose. The suspension was centrifuged at 1,200 x g for 10 min at 4 °C. The supernatant was separated and centrifuged at 23,500 x g for 20 min at 4 °C. The pellet was resuspended in 5-6 volumes of buffer (50 mM TRIS, pH 7.4) and centrifuged again at 23,500 x g (20 min, 4 °C). This procedure was repeated twice. The final pellet was resuspended in 5-6 volumes of buffer and frozen (-80 °C) in 1.5 mL portions containing about 1.5 mg protein/mL.

### **2.3. Preparation of membrane homogenates from rat liver**

Two rat livers were cut into small pieces and homogenized with the potter (500-800 rpm, 10 up and down strokes) in 6 volumes of cold 0.32 M sucrose. The suspension was centrifuged at 1,200 x g for 10 min at 4 °C. The supernatant was separated and centrifuged at 31,000 x g for 20 min at 4 °C. The pellet was resuspended in 5-6 volumes of buffer (50 mM TRIS, pH 8.0) and incubated at rt for 30 min. After the incubation, the suspension was centrifuged again at 31,000 x g for 20 min at 4 °C. The final pellet was

resuspended in 5-6 volumes of buffer and stored at -80 °C in 1.5 mL portions containing about 2 mg protein/mL.

#### **2.4. Protein determination**

The protein concentration was determined by the method of Bradford,<sup>1</sup> modified by Stoscheck.<sup>2</sup> The Bradford solution was prepared by dissolving 5 mg of Coomassie Brilliant Blue G 250 in 2.5 mL of EtOH (95 %, v/v). 10 mL deionized H<sub>2</sub>O and 5 mL phosphoric acid (85 %, m/v) were added to this solution, the mixture was stirred and filled to a total volume of 50 mL with deionized water. The calibration was carried out using bovine serum albumin as a standard in 9 concentrations (0.1, 0.2, 0.4, 0.6, 0.8, 1.0, 1.5, 2.0 and 4.0 mg /mL). In a 96 well standard multiplate, 10 µL of the calibration solution or 10 µL of the membrane receptor preparation were mixed with 190 µL of the Bradford solution, respectively. After 5 min, the UV absorption of the protein-dye complex at  $\lambda = 595$  nm was measured with a plate reader (Tecan Genios®, Tecan, Crailsheim, Germany).

#### **2.5. General procedures for the binding assays**

The test compound solutions were prepared by dissolving approximately 10 µmol (usually 2-4 mg) of test compound in DMSO so that a 10 mM stock solution was obtained. To obtain the required test solutions for the assay, the DMSO stock solution was diluted with the respective assay buffer. The filtermats were presoaked in 0.5 % aqueous polyethylenimine solution for 2 h at rt before use. All binding experiments were carried out in duplicates in the 96 well multiplates. The concentrations given are the final concentration in the assay. Generally, the assays were performed by addition of 50 µL of the respective assay buffer, 50 µL of test compound solution in various concentrations ( $10^{-5}$ ,  $10^{-6}$ ,  $10^{-7}$ ,  $10^{-8}$ ,  $10^{-9}$  and  $10^{-10}$  mol/L), 50 µL of the corresponding radioligand solution and 50 µL of the respective receptor preparation into each well of the multiplate (total volume 200 µL). The receptor preparation was always added last. During the incubation, the multiplates were shaken at a speed of 500-600 rpm at the specified temperature. Unless otherwise noted, the assays were terminated after 120 min by rapid filtration using the harvester. During the filtration, each well was washed five times with 300 µL of water.

Subsequently, the filtermats were dried at 95 °C. The solid scintillator was melted on the dried filtermats at a temperature of 95 °C for 5 min. After solidifying of the scintillator at rt, the trapped radioactivity in the filtermats was measured with the scintillation analyzer. Each position on the filtermat corresponding to one well of the multiplate was measured for 5 min with the [<sup>3</sup>H]-counting protocol. The overall counting efficiency was 20 %. The *IC*<sub>50</sub> values were calculated with the program GraphPad Prism® 3.0 (GraphPad Software, San Diego, CA, USA) by non-linear regression analysis. Subsequently, the *IC*<sub>50</sub> values were transformed into *K*<sub>i</sub> values using the equation of Cheng and Prusoff.<sup>3</sup> The *K*<sub>i</sub> values are given as mean value ± SEM from three independent experiments.

## 2.6. $\sigma_1$ receptor assay

The assay was performed with the radioligand [<sup>3</sup>H]-(+)-pentazocine (22.0 Ci/mmol; Perkin Elmer). The thawed membrane preparation of guinea pig brain (about 100 µg of the protein) was incubated with various concentrations of test compounds, 2 nM [<sup>3</sup>H]-(+)-pentazocine, and TRIS buffer (50 mM, pH 7.4) at 37 °C. The non-specific binding was determined with 10 µM unlabeled (+)-pentazocine. The *K*<sub>d</sub> value of (+)-pentazocine is 2.9 nM.<sup>4</sup>

## 2.7. $\sigma_2$ receptor assay

The assays were performed with the radioligand [<sup>3</sup>H]di-*o*-tolyguanidine (specific activity 50 Ci/mmol; ARC, St. Louis, MO, USA). The thawed rat liver membrane preparation (about 100 µg protein) was incubated with various concentrations of the test compound, 3 nM [<sup>3</sup>H]di-*o*-tolyguanidine and buffer containing (+)-pentazocine (500 nM (+)-pentazocine in TRIS buffer (50 mM TRIS, pH 8.0)) at rt. The non-specific binding was determined with 10 µM non-labeled di-*o*-tolyguanidine. The *K*<sub>d</sub> value of di-*o*-tolyguanidine is 17.9 nM.<sup>5</sup>

**2.8. References for receptor binding studies**

1. M. M. Bradford, A rapid and sensitive method for the quantitation of microgram quantities of protein utilizing the principle of protein-dye binding, *Anal. Biochem.* 72 (1976) 248–254.
2. C. Stoscheck, Quantification of protein, *Methods Enzymol.* 182 (1990) 50–68.
3. Y.-C. Cheng, W. H. Prusoff, Relationship between the inhibition constant (KI) and the concentration of inhibitor which causes 50 per cent inhibition (I50) of an enzymatic reaction, *Biochem. Pharmacol.* 22 (1973) 3099–3108.
4. D. L. DeHaven-Hudkins, L. C. Fleissner, F. Y. Ford-Rice, Characterization of the binding of [3H](+)-pentazocine to  $\sigma$  recognition sites in guinea pig brain, *Eur. J. Pharmacol. Mol. Pharmacol.* 227 (1992) 371–378.
5. R. H. Mach, C. R. Smith, S. R. Childers, Ibogaine possesses a selective affinity for  $\sigma_2$  receptors, *Life Sci.* 57 (1995) PL57–PL62.

### 3. Crystallography section

#### 3.1. General

*X-Ray diffraction:* Data sets for compounds *syn-7*, *anti-21*, *syn,anti-22*, *anti,syn-22* and *syn-23* were collected with a Nonius Kappa CCD diffractometer. Programs used: data collection, COLLECT;<sup>1</sup> data reduction Denzo-SMN;<sup>2</sup> absorption correction;<sup>3</sup> structure solution *SHELXT-2015*;<sup>4</sup> structure refinement *SHELXL-2015*<sup>5</sup> and graphics, *XP*.<sup>6</sup> *R*-values are given for observed reflections, and *wR*<sup>2</sup> values are given for all reflections.

#### 3.2. X-ray crystal structure of *syn-7*

Carbamate *syn-7* was crystallized from EtOAc. Colorless crystals. Code DAN7291

*X-ray crystal structure analysis of syn-7 (dan7291):* A colorless plate-like specimen of C<sub>21</sub>H<sub>27</sub>NO<sub>4</sub>, approximate dimensions 0.100 mm x 0.200 mm x 0.350 mm, was used for the X-ray crystallographic analysis. The X-ray intensity data were measured.

The integration of the data using a monoclinic unit cell yielded a total of 3302 reflections to a maximum  $\theta$  angle of 67.19° (0.84 Å resolution), of which 3302 were independent (average redundancy 1.000, completeness = 97.6%, *R*<sub>sig</sub> = 2.02%) and 3062 (92.73%) were greater than 2 $\sigma$ (*F*<sup>2</sup>).

The final cell constants of *a* = 6.9404(2) Å, *b* = 12.2651(4) Å, *c* = 22.3938(10) Å,  $\beta$  = 98.330(2)°, volume = 1886.15(12) Å<sup>3</sup>, are based upon the refinement of the XYZ-centroids of reflections above 20  $\sigma$ (*I*). Data were corrected for absorption effects using the multi-scan method (SADABS). The calculated minimum and maximum transmission coefficients (based on crystal size) are 0.7920 and 0.9330.

The structure was solved and refined using the Bruker SHELXTL Software Package, using the space group P 1 21/c 1, with *Z* = 4 for the formula unit, C<sub>21</sub>H<sub>27</sub>NO<sub>4</sub>. The final anisotropic full-matrix least-squares refinement on *F*<sup>2</sup> with 241 variables converged at *R*1 = 3.98%, for the observed data and *wR*2 = 9.96% for all data. The goodness-of-fit was 1.054. The largest peak in the final difference electron density synthesis was 0.198 e<sup>-</sup>/Å<sup>3</sup> and the largest hole was -0.192 e<sup>-</sup>/Å<sup>3</sup> with an RMS deviation of 0.034 e<sup>-</sup>/Å<sup>3</sup>. On the basis of the final model, the calculated density was 1.259 g/cm<sup>3</sup> and *F*(000), 768 e<sup>-</sup>. CCDC number: 2073466.



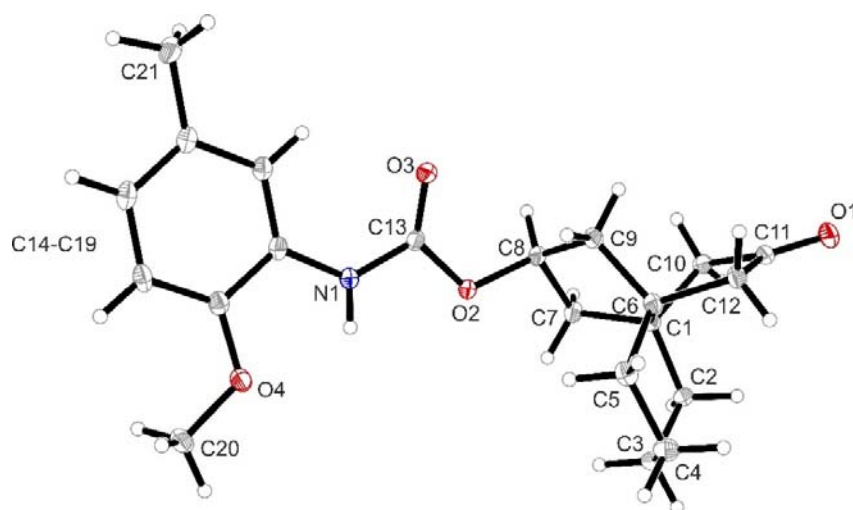Table S1. Sample and crystal data for *syn-7*.

|                        |                              |                           |
|------------------------|------------------------------|---------------------------|
| Identification code    | dan7291                      |                           |
| Chemical formula       | $C_{21}H_{27}NO_4$           |                           |
| Formula weight         | 357.43 g/mol                 |                           |
| Temperature            | 223(2) K                     |                           |
| Wavelength             | 1.54178 Å                    |                           |
| Crystal size           | 0.100 x 0.200 x 0.350 mm     |                           |
| Crystal habit          | colorless plate              |                           |
| Crystal system         | monoclinic                   |                           |
| Space group            | P 1 21/c 1                   |                           |
| Unit cell dimensions   | $a = 6.9404(2)$ Å            | $\alpha = 90^\circ$       |
|                        | $b = 12.2651(4)$ Å           | $\beta = 98.330(2)^\circ$ |
|                        | $c = 22.3938(10)$ Å          | $\gamma = 90^\circ$       |
| Volume                 | $1886.15(12)$ Å <sup>3</sup> |                           |
| Z                      | 4                            |                           |
| Density (calculated)   | 1.259 g/cm <sup>3</sup>      |                           |
| Absorption coefficient | 0.699 mm <sup>-1</sup>       |                           |
| F(000)                 | 768                          |                           |

Table S2. Data collection and structure refinement for *syn-7*.

|                                 |                                                                                     |                           |
|---------------------------------|-------------------------------------------------------------------------------------|---------------------------|
| Theta range for data collection | 3.99 to 67.19°                                                                      |                           |
| Reflections collected           | 3302                                                                                |                           |
| Absorption correction           | multi-scan                                                                          |                           |
| Max. and min. transmission      | 0.9330 and 0.7920                                                                   |                           |
| Structure solution technique    | direct methods                                                                      |                           |
| Structure solution program      | SHELXL-2014/7 (Sheldrick, 2014)                                                     |                           |
| Refinement method               | Full-matrix least-squares on $F^2$                                                  |                           |
| Refinement program              | SHELXL-2014/7 (Sheldrick, 2014)                                                     |                           |
| Function minimized              | $\sum w(F_o^2 - F_c^2)^2$                                                           |                           |
| Data / restraints / parameters  | 3302 / 0 / 241                                                                      |                           |
| Goodness-of-fit on $F^2$        | 1.054                                                                               |                           |
| Final R indices                 | 3062 data; $I > 2\sigma(I)$                                                         | R1 = 0.0398, wR2 = 0.0974 |
|                                 | all data                                                                            | R1 = 0.0423, wR2 = 0.0996 |
| Weighting scheme                | $w = 1/[\sigma^2(F_o^2) + (0.0439P)^2 + 0.5589P]$<br>where $P = (F_o^2 + 2F_c^2)/3$ |                           |
| Largest diff. peak and hole     | 0.198 and -0.192 eÅ <sup>-3</sup>                                                   |                           |
| R.M.S. deviation from mean      | 0.034 eÅ <sup>-3</sup>                                                              |                           |

Table S3. Atomic coordinates and equivalent isotropic atomic displacement parameters (Å<sup>2</sup>) for *syn-7*.

U(eq) is defined as one third of the trace of the orthogonalized  $U_{ij}$  tensor.

|    | x/a         | y/b         | z/c        | U(eq)     |
|----|-------------|-------------|------------|-----------|
| O1 | 0.18777(18) | 0.50705(9)  | 0.55471(6) | 0.0634(3) |
| O2 | 0.13493(13) | 0.07912(7)  | 0.37690(4) | 0.0408(2) |
| O3 | 0.81958(15) | 0.08786(8)  | 0.33377(5) | 0.0521(3) |
| O4 | 0.10912(16) | 0.73057(8)  | 0.32734(5) | 0.0511(3) |
| N1 | 0.00244(19) | 0.93361(10) | 0.32961(6) | 0.0439(3) |
| C1 | 0.34633(18) | 0.28500(10) | 0.47320(6) | 0.0333(3) |
| C2 | 0.54633(19) | 0.27699(12) | 0.51195(6) | 0.0416(3) |
| C3 | 0.5967(2)   | 0.16265(13) | 0.53496(8) | 0.0541(4) |
| C4 | 0.4417(3)   | 0.11989(14) | 0.57038(8) | 0.0583(4) |
| C5 | 0.2438(2)   | 0.11788(12) | 0.53067(7) | 0.0477(4) |

## S11

|     | x/a         | y/b         | z/c        | U(eq)     |
|-----|-------------|-------------|------------|-----------|
| C6  | 0.18106(19) | 0.22849(10) | 0.50237(6) | 0.0359(3) |
| C7  | 0.3370(2)   | 0.23240(12) | 0.41101(6) | 0.0406(3) |
| C8  | 0.12640(19) | 0.19445(10) | 0.39283(6) | 0.0391(3) |
| C9  | 0.02181(19) | 0.21310(11) | 0.44765(6) | 0.0416(3) |
| C10 | 0.2811(2)   | 0.40498(11) | 0.47030(6) | 0.0410(3) |
| C11 | 0.1958(2)   | 0.42160(11) | 0.52794(7) | 0.0436(3) |
| C12 | 0.1268(2)   | 0.31271(12) | 0.54799(7) | 0.0447(3) |
| C13 | 0.9699(2)   | 0.03815(11) | 0.34554(6) | 0.0387(3) |
| C14 | 0.8653(2)   | 0.85987(11) | 0.29939(6) | 0.0397(3) |
| C15 | 0.9243(2)   | 0.75097(11) | 0.29824(6) | 0.0425(3) |
| C16 | 0.7980(3)   | 0.67379(12) | 0.26971(7) | 0.0509(4) |
| C17 | 0.6139(2)   | 0.70453(13) | 0.24203(7) | 0.0517(4) |
| C18 | 0.5529(2)   | 0.81163(12) | 0.24229(6) | 0.0453(3) |
| C19 | 0.6811(2)   | 0.88905(11) | 0.27142(6) | 0.0427(3) |
| C20 | 0.1808(3)   | 0.62199(14) | 0.32622(8) | 0.0682(5) |
| C21 | 0.3550(2)   | 0.84624(15) | 0.21131(8) | 0.0588(4) |

Table S4. Bond lengths (Å) for *syn-7*.

|        |            |        |            |
|--------|------------|--------|------------|
| O1-C11 | 1.2128(17) | O2-C13 | 1.3507(16) |
| O2-C8  | 1.4621(15) | O3-C13 | 1.2041(16) |
| O4-C15 | 1.3751(18) | O4-C20 | 1.4231(19) |
| N1-C13 | 1.3586(18) | N1-C14 | 1.4125(18) |
| N1-H01 | 0.866(18)  | C1-C7  | 1.5278(18) |
| C1-C2  | 1.5298(18) | C1-C10 | 1.5382(18) |
| C1-C6  | 1.5621(17) | C2-C3  | 1.517(2)   |
| C2-H2A | 0.98       | C2-H2B | 0.98       |
| C3-C4  | 1.520(2)   | C3-H3A | 0.98       |
| C3-H3B | 0.98       | C4-C5  | 1.525(2)   |
| C4-H4A | 0.98       | C4-H4B | 0.98       |
| C5-C6  | 1.5335(19) | C5-H5A | 0.98       |
| C5-H5B | 0.98       | C6-C12 | 1.5375(18) |

## S12

|          |            |          |            |
|----------|------------|----------|------------|
| C6-C9    | 1.5384(19) | C7-C8    | 1.5319(18) |
| C7-H7A   | 0.98       | C7-H7B   | 0.98       |
| C8-C9    | 1.5311(19) | C8-H8    | 0.99       |
| C9-H9A   | 0.98       | C9-H9B   | 0.98       |
| C10-C11  | 1.510(2)   | C10-H10A | 0.98       |
| C10-H10B | 0.98       | C11-C12  | 1.509(2)   |
| C12-H12A | 0.98       | C12-H12B | 0.98       |
| C14-C19  | 1.387(2)   | C14-C15  | 1.3983(19) |
| C15-C16  | 1.382(2)   | C16-C17  | 1.389(2)   |
| C16-H16  | 0.94       | C17-C18  | 1.380(2)   |
| C17-H17  | 0.94       | C18-C19  | 1.3966(19) |
| C18-C21  | 1.508(2)   | C19-H19  | 0.94       |
| C20-H20A | 0.97       | C20-H20B | 0.97       |
| C20-H20C | 0.97       | C21-H21A | 0.97       |
| C21-H21B | 0.97       | C21-H21C | 0.97       |

Table S5. Bond angles (°) for *syn-7*.

|            |            |            |            |
|------------|------------|------------|------------|
| C13-O2-C8  | 115.18(10) | C15-O4-C20 | 117.80(13) |
| C13-N1-C14 | 127.15(13) | C13-N1-H01 | 116.8(11)  |
| C14-N1-H01 | 115.7(11)  | C7-C1-C2   | 113.89(11) |
| C7-C1-C10  | 113.09(11) | C2-C1-C10  | 108.83(10) |
| C7-C1-C6   | 104.90(10) | C2-C1-C6   | 113.28(11) |
| C10-C1-C6  | 102.28(10) | C3-C2-C1   | 113.43(12) |
| C3-C2-H2A  | 108.9      | C1-C2-H2A  | 108.9      |
| C3-C2-H2B  | 108.9      | C1-C2-H2B  | 108.9      |
| H2A-C2-H2B | 107.7      | C2-C3-C4   | 110.51(13) |
| C2-C3-H3A  | 109.5      | C4-C3-H3A  | 109.5      |
| C2-C3-H3B  | 109.5      | C4-C3-H3B  | 109.5      |
| H3A-C3-H3B | 108.1      | C3-C4-C5   | 110.32(13) |
| C3-C4-H4A  | 109.6      | C5-C4-H4A  | 109.6      |
| C3-C4-H4B  | 109.6      | C5-C4-H4B  | 109.6      |
| H4A-C4-H4B | 108.1      | C4-C5-C6   | 113.87(12) |

## S13

|               |            |               |            |
|---------------|------------|---------------|------------|
| C4-C5-H5A     | 108.8      | C6-C5-H5A     | 108.8      |
| C4-C5-H5B     | 108.8      | C6-C5-H5B     | 108.8      |
| H5A-C5-H5B    | 107.7      | C5-C6-C12     | 113.71(11) |
| C5-C6-C9      | 110.42(11) | C12-C6-C9     | 113.25(11) |
| C5-C6-C1      | 112.56(11) | C12-C6-C1     | 104.19(10) |
| C9-C6-C1      | 101.98(10) | C1-C7-C8      | 106.45(10) |
| C1-C7-H7A     | 110.4      | C8-C7-H7A     | 110.4      |
| C1-C7-H7B     | 110.4      | C8-C7-H7B     | 110.4      |
| H7A-C7-H7B    | 108.6      | O2-C8-C9      | 112.39(11) |
| O2-C8-C7      | 106.74(11) | C9-C8-C7      | 106.66(10) |
| O2-C8-H8      | 110.3      | C9-C8-H8      | 110.3      |
| C7-C8-H8      | 110.3      | C8-C9-C6      | 106.72(10) |
| C8-C9-H9A     | 110.4      | C6-C9-H9A     | 110.4      |
| C8-C9-H9B     | 110.4      | C6-C9-H9B     | 110.4      |
| H9A-C9-H9B    | 108.6      | C11-C10-C1    | 104.04(11) |
| C11-C10-H10A  | 110.9      | C1-C10-H10A   | 110.9      |
| C11-C10-H10B  | 110.9      | C1-C10-H10B   | 110.9      |
| H10A-C10-H10B | 109.0      | O1-C11-C12    | 125.33(14) |
| O1-C11-C10    | 126.25(14) | C12-C11-C10   | 108.39(11) |
| C11-C12-C6    | 106.15(11) | C11-C12-H12A  | 110.5      |
| C6-C12-H12A   | 110.5      | C11-C12-H12B  | 110.5      |
| C6-C12-H12B   | 110.5      | H12A-C12-H12B | 108.7      |
| O3-C13-O2     | 124.61(12) | O3-C13-N1     | 126.31(13) |
| O2-C13-N1     | 109.08(12) | C19-C14-C15   | 119.43(13) |
| C19-C14-N1    | 124.36(13) | C15-C14-N1    | 116.21(13) |
| O4-C15-C16    | 125.45(13) | O4-C15-C14    | 114.87(12) |
| C16-C15-C14   | 119.67(14) | C15-C16-C17   | 120.08(14) |
| C15-C16-H16   | 120.0      | C17-C16-H16   | 120.0      |
| C18-C17-C16   | 121.27(14) | C18-C17-H17   | 119.4      |
| C16-C17-H17   | 119.4      | C17-C18-C19   | 118.31(14) |
| C17-C18-C21   | 121.70(13) | C19-C18-C21   | 119.98(14) |
| C14-C19-C18   | 121.24(14) | C14-C19-H19   | 119.4      |

## S14

|               |       |               |       |
|---------------|-------|---------------|-------|
| C18-C19-H19   | 119.4 | O4-C20-H20A   | 109.5 |
| O4-C20-H20B   | 109.5 | H20A-C20-H20B | 109.5 |
| O4-C20-H20C   | 109.5 | H20A-C20-H20C | 109.5 |
| H20B-C20-H20C | 109.5 | C18-C21-H21A  | 109.5 |
| C18-C21-H21B  | 109.5 | H21A-C21-H21B | 109.5 |
| C18-C21-H21C  | 109.5 | H21A-C21-H21C | 109.5 |
| H21B-C21-H21C | 109.5 |               |       |

Table S6. Torsion angles (°) for *syn-7*.

|                |             |                |             |
|----------------|-------------|----------------|-------------|
| C7-C1-C2-C3    | -71.62(15)  | C10-C1-C2-C3   | 161.20(12)  |
| C6-C1-C2-C3    | 48.17(16)   | C1-C2-C3-C4    | -56.53(17)  |
| C2-C3-C4-C5    | 59.27(17)   | C3-C4-C5-C6    | -55.86(18)  |
| C4-C5-C6-C12   | -70.87(16)  | C4-C5-C6-C9    | 160.55(12)  |
| C4-C5-C6-C1    | 47.32(16)   | C7-C1-C6-C5    | 82.04(13)   |
| C2-C1-C6-C5    | -42.76(15)  | C10-C1-C6-C5   | -159.72(11) |
| C7-C1-C6-C12   | -154.31(11) | C2-C1-C6-C12   | 80.89(13)   |
| C10-C1-C6-C12  | -36.06(13)  | C7-C1-C6-C9    | -36.28(12)  |
| C2-C1-C6-C9    | -161.08(11) | C10-C1-C6-C9   | 81.97(11)   |
| C2-C1-C7-C8    | 151.28(11)  | C10-C1-C7-C8   | -83.79(13)  |
| C6-C1-C7-C8    | 26.86(14)   | C13-O2-C8-C9   | 79.36(14)   |
| C13-O2-C8-C7   | -164.06(11) | C1-C7-C8-O2    | -126.92(11) |
| C1-C7-C8-C9    | -6.58(15)   | O2-C8-C9-C6    | 100.00(12)  |
| C7-C8-C9-C6    | -16.64(14)  | C5-C6-C9-C8    | -87.41(13)  |
| C12-C6-C9-C8   | 143.76(11)  | C1-C6-C9-C8    | 32.42(13)   |
| C7-C1-C10-C11  | 149.80(11)  | C2-C1-C10-C11  | -82.58(13)  |
| C6-C1-C10-C11  | 37.53(12)   | C1-C10-C11-O1  | 152.95(14)  |
| C1-C10-C11-C12 | -25.41(14)  | O1-C11-C12-C6  | -175.87(13) |
| C10-C11-C12-C6 | 2.51(15)    | C5-C6-C12-C11  | 143.91(12)  |
| C9-C6-C12-C11  | -88.97(13)  | C1-C6-C12-C11  | 21.01(14)   |
| C8-O2-C13-O3   | -4.48(19)   | C8-O2-C13-N1   | 175.17(11)  |
| C14-N1-C13-O3  | -4.1(2)     | C14-N1-C13-O2  | 176.25(12)  |
| C13-N1-C14-C19 | 12.2(2)     | C13-N1-C14-C15 | -168.15(13) |

## S15

|                 |             |                 |             |
|-----------------|-------------|-----------------|-------------|
| C20-O4-C15-C16  | 2.6(2)      | C20-O4-C15-C14  | -178.00(13) |
| C19-C14-C15-O4  | -179.89(12) | N1-C14-C15-O4   | 0.39(18)    |
| C19-C14-C15-C16 | -0.5(2)     | N1-C14-C15-C16  | 179.79(13)  |
| O4-C15-C16-C17  | 179.70(13)  | C14-C15-C16-C17 | 0.4(2)      |
| C15-C16-C17-C18 | 0.0(2)      | C16-C17-C18-C19 | -0.2(2)     |
| C16-C17-C18-C21 | 178.73(14)  | C15-C14-C19-C18 | 0.3(2)      |
| N1-C14-C19-C18  | 179.95(13)  | C17-C18-C19-C14 | 0.1(2)      |
| C21-C18-C19-C14 | -178.88(13) |                 |             |

TableS 7. Anisotropic atomic displacement parameters ( $\text{\AA}^2$ ) for *syn-7*.

The anisotropic atomic displacement factor exponent takes the form:  $-2\pi^2 [h^2 a^{*2} U_{11} + \dots + 2 h k a^* b^* U_{12}]$

|     | $U_{11}$   | $U_{22}$  | $U_{33}$  | $U_{23}$   | $U_{13}$   | $U_{12}$   |
|-----|------------|-----------|-----------|------------|------------|------------|
| O1  | 0.0706(7)  | 0.0445(6) | 0.0729(8) | -0.0219(5) | 0.0033(6)  | 0.0064(5)  |
| O2  | 0.0419(5)  | 0.0351(5) | 0.0426(5) | -0.0071(4) | -0.0032(4) | 0.0014(4)  |
| O3  | 0.0469(6)  | 0.0394(5) | 0.0639(7) | -0.0082(5) | -0.0123(5) | 0.0037(5)  |
| O4  | 0.0639(7)  | 0.0403(5) | 0.0475(6) | -0.0042(4) | 0.0029(5)  | 0.0075(5)  |
| N1  | 0.0455(7)  | 0.0355(6) | 0.0481(7) | -0.0070(5) | -0.0015(5) | 0.0004(5)  |
| C1  | 0.0323(6)  | 0.0323(6) | 0.0349(6) | -0.0017(5) | 0.0038(5)  | -0.0019(5) |
| C2  | 0.0339(7)  | 0.0454(8) | 0.0438(7) | -0.0031(6) | -0.0002(6) | 0.0004(6)  |
| C3  | 0.0472(8)  | 0.0546(9) | 0.0570(9) | 0.0034(7)  | -0.0049(7) | 0.0127(7)  |
| C4  | 0.0738(11) | 0.0477(9) | 0.0515(9) | 0.0128(7)  | 0.0026(8)  | 0.0096(8)  |
| C5  | 0.0584(9)  | 0.0376(7) | 0.0492(8) | 0.0052(6)  | 0.0148(7)  | -0.0027(6) |
| C6  | 0.0364(7)  | 0.0333(7) | 0.0392(7) | -0.0032(5) | 0.0090(5)  | -0.0022(5) |
| C7  | 0.0405(7)  | 0.0448(8) | 0.0369(7) | -0.0053(6) | 0.0074(6)  | -0.0055(6) |
| C8  | 0.0430(7)  | 0.0322(7) | 0.0399(7) | -0.0051(5) | -0.0009(6) | -0.0015(5) |
| C9  | 0.0339(7)  | 0.0388(7) | 0.0520(8) | -0.0091(6) | 0.0056(6)  | -0.0041(5) |
| C10 | 0.0418(7)  | 0.0325(7) | 0.0465(8) | 0.0009(6)  | -0.0005(6) | -0.0035(6) |
| C11 | 0.0391(7)  | 0.0393(7) | 0.0497(8) | -0.0101(6) | -0.0025(6) | 0.0058(6)  |
| C12 | 0.0441(8)  | 0.0466(8) | 0.0450(8) | -0.0093(6) | 0.0119(6)  | -0.0010(6) |
| C13 | 0.0443(8)  | 0.0353(7) | 0.0347(7) | -0.0023(5) | -0.0002(6) | -0.0023(6) |
| C14 | 0.0508(8)  | 0.0357(7) | 0.0330(6) | -0.0026(5) | 0.0078(6)  | -0.0063(6) |

## S16

|     |            |            |            |            |            |            |
|-----|------------|------------|------------|------------|------------|------------|
| C15 | 0.0564(9)  | 0.0388(7)  | 0.0327(7)  | -0.0001(5) | 0.0076(6)  | -0.0008(6) |
| C16 | 0.0748(11) | 0.0332(7)  | 0.0455(8)  | -0.0045(6) | 0.0119(7)  | -0.0061(7) |
| C17 | 0.0646(10) | 0.0452(8)  | 0.0452(8)  | -0.0075(6) | 0.0076(7)  | -0.0168(7) |
| C18 | 0.0526(8)  | 0.0458(8)  | 0.0382(7)  | -0.0037(6) | 0.0088(6)  | -0.0120(7) |
| C19 | 0.0507(8)  | 0.0379(7)  | 0.0393(7)  | -0.0022(6) | 0.0060(6)  | -0.0053(6) |
| C20 | 0.0945(14) | 0.0513(10) | 0.0550(10) | -0.0099(8) | -0.0023(9) | 0.0252(9)  |
| C21 | 0.0534(9)  | 0.0602(10) | 0.0613(10) | -0.0089(8) | 0.0029(8)  | -0.0131(8) |

Table S8. Hydrogen atomic coordinates and isotropic atomic displacement parameters ( $\text{\AA}^2$ ) for *syn-7*.

|      | x/a      | y/b         | z/c       | U(eq)    |
|------|----------|-------------|-----------|----------|
| H01  | 0.116(3) | -0.0936(14) | 0.3429(8) | 0.053(5) |
| H2A  | 0.6458   | 0.3016      | 0.4881    | 0.05     |
| H2B  | 0.5496   | 0.3263      | 0.5465    | 0.05     |
| H3A  | 0.7232   | 0.1635      | 0.5609    | 0.065    |
| H3B  | 0.6068   | 0.1142      | 0.5008    | 0.065    |
| H4A  | 0.4352   | 0.1667      | 0.6055    | 0.07     |
| H4B  | 0.4762   | 0.0461      | 0.5850    | 0.07     |
| H5A  | 0.1455   | 0.0934      | 0.5550    | 0.057    |
| H5B  | 0.2479   | 0.0645      | 0.4983    | 0.057    |
| H7A  | 0.4265   | 0.1703      | 0.4127    | 0.049    |
| H7B  | 0.3730   | 0.2853      | 0.3817    | 0.049    |
| H8   | 0.0630   | 0.2371      | 0.3579    | 0.047    |
| H9A  | -0.0601  | 0.1502      | 0.4539    | 0.05     |
| H9B  | -0.0609  | 0.2781      | 0.4417    | 0.05     |
| H10A | 0.3920   | 0.4538      | 0.4686    | 0.049    |
| H10B | 0.1832   | 0.4182      | 0.4349    | 0.049    |
| H12A | -0.0144  | 0.3137      | 0.5480    | 0.054    |
| H12B | 0.1909   | 0.2952      | 0.5888    | 0.054    |
| H16  | -0.1632  | -0.3996     | 0.2690    | 0.061    |
| H17  | -0.4708  | -0.3486     | 0.2227    | 0.062    |
| H19  | -0.3582  | -0.0377     | 0.2721    | 0.051    |



# S17

|      |         |         |        |       |
|------|---------|---------|--------|-------|
| H20A | 0.0997  | -0.4261 | 0.3463 | 0.102 |
| H20B | 0.3136  | -0.3807 | 0.3469 | 0.102 |
| H20C | 0.1780  | -0.4012 | 0.2847 | 0.102 |
| H21A | -0.7151 | -0.2170 | 0.1935 | 0.088 |
| H21B | -0.6298 | -0.1013 | 0.1799 | 0.088 |
| H21C | -0.7173 | -0.1207 | 0.2405 | 0.088 |

### 3.3. X-ray crystal structure of *anti*-21

Compound *anti*-21 was crystallized from EtOAc. Colorless crystals. Code DAN6940

*X-ray crystal structure analysis of anti-21 (dan6940)*: A colorless prism-like specimen of  $C_{28}H_{34}N_2O_3$ , approximate dimensions 0.060 mm x 0.240 mm x 0.260 mm, was used for the X-ray crystallographic analysis. The X-ray intensity data were measured.

The integration of the data using a monoclinic unit cell yielded a total of 4159 reflections to a maximum  $\theta$  angle of  $67.08^\circ$  (0.84 Å resolution), of which 4159 were independent (average redundancy 1.000, completeness = 96.3%,  $R_{sig} = 2.90\%$ ) and 3509 (84.37%) were greater than  $2\sigma(F^2)$ .

The final cell constants of  $a = 8.5091(4)$  Å,  $b = 15.9061(5)$  Å,  $c = 17.8829(6)$  Å,  $\beta = 94.139(3)^\circ$ , volume =  $2414.08(16)$  Å<sup>3</sup>, are based upon the refinement of the XYZ-centroids of reflections above  $20\sigma(I)$ . Data were corrected for absorption effects using the multi-scan method (SADABS). The calculated minimum and maximum transmission coefficients (based on crystal size) are 0.8530 and 0.9630.

The structure was solved and refined using the Bruker SHELXTL Software Package, using the space group  $P 1 21/n 1$ , with  $Z = 4$  for the formula unit,  $C_{28}H_{34}N_2O_3$ . The final anisotropic full-matrix least-squares refinement on  $F^2$  with 304 variables converged at  $R1 = 7.05\%$ , for the observed data and  $wR2 = 20.59\%$  for all data. The goodness-of-fit was 1.041. The largest peak in the final difference electron density synthesis was  $0.482\text{ e}^-/\text{\AA}^3$  and the largest hole was  $-0.353\text{ e}^-/\text{\AA}^3$  with an RMS deviation of  $0.056\text{ e}^-/\text{\AA}^3$ . On the basis of the final model, the calculated density was  $1.229\text{ g/cm}^3$  and  $F(000)$ , 960  $e^-$ . CCDC number: 2073467.

## S19

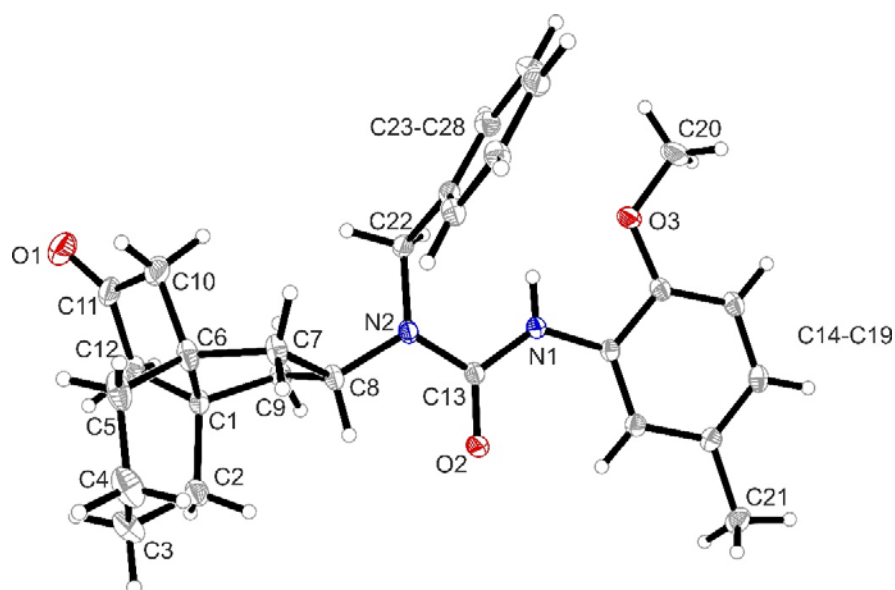Table S9. Sample and crystal data for *anti*-**21**.

|                        |                                                               |                |
|------------------------|---------------------------------------------------------------|----------------|
| Identification code    | dan6940                                                       |                |
| Chemical formula       | C <sub>28</sub> H <sub>34</sub> N <sub>2</sub> O <sub>3</sub> |                |
| Formula weight         | 446.57 g/mol                                                  |                |
| Temperature            | 223(2) K                                                      |                |
| Wavelength             | 1.54178 Å                                                     |                |
| Crystal size           | 0.060 x 0.240 x 0.260 mm                                      |                |
| Crystal habit          | colorless prism                                               |                |
| Crystal system         | Monoclinic                                                    |                |
| Space group            | P 1 21/n 1                                                    |                |
| Unit cell dimensions   | a = 8.5091(4) Å                                               | α = 90°        |
|                        | b = 15.9061(5) Å                                              | β = 94.139(3)° |
|                        | c = 17.8829(6) Å                                              | γ = 90°        |
| Volume                 | 2414.08(16) Å <sup>3</sup>                                    |                |
| Z                      | 4                                                             |                |
| Density (calculated)   | 1.229 g/cm <sup>3</sup>                                       |                |
| Absorption coefficient | 0.629 mm <sup>-1</sup>                                        |                |
| F(000)                 | 960                                                           |                |

Table S10. Data collection and structure refinement for *anti*-**21**.

|                                 |                                                                                     |                           |
|---------------------------------|-------------------------------------------------------------------------------------|---------------------------|
| Theta range for data collection | 4.96 to 67.08°                                                                      |                           |
| Reflections collected           | 4159                                                                                |                           |
| Absorption correction           | multi-scan                                                                          |                           |
| Max. and min. transmission      | 0.9630 and 0.8530                                                                   |                           |
| Structure solution technique    | direct methods                                                                      |                           |
| Structure solution program      | SHELXL-2014/7 (Sheldrick, 2014)                                                     |                           |
| Refinement method               | Full-matrix least-squares on $F^2$                                                  |                           |
| Refinement program              | SHELXL-2014/7 (Sheldrick, 2014)                                                     |                           |
| Function minimized              | $\sum w(F_o^2 - F_c^2)^2$                                                           |                           |
| Data / restraints / parameters  | 4159 / 0 / 304                                                                      |                           |
| Goodness-of-fit on $F^2$        | 1.041                                                                               |                           |
| Final R indices                 | 3509 data; $I > 2\sigma(I)$                                                         | R1 = 0.0705, wR2 = 0.1949 |
|                                 | all data                                                                            | R1 = 0.0803, wR2 = 0.2059 |
| Weighting scheme                | $w = 1/[\sigma^2(F_o^2) + (0.1136P)^2 + 1.6562P]$<br>where $P = (F_o^2 + 2F_c^2)/3$ |                           |
| Largest diff. peak and hole     | 0.482 and -0.353 eÅ <sup>-3</sup>                                                   |                           |
| R.M.S. deviation from mean      | 0.056 eÅ <sup>-3</sup>                                                              |                           |

Table S11. Atomic coordinates and equivalent isotropic atomic displacement parameters (Å<sup>2</sup>) for *anti*-**21**.

U(eq) is defined as one third of the trace of the orthogonalized  $U_{ij}$  tensor.

|    | x/a       | y/b         | z/c         | U(eq)      |
|----|-----------|-------------|-------------|------------|
| N1 | 0.3799(2) | 0.30176(12) | 0.36623(12) | 0.0432(5)  |
| N2 | 0.4569(3) | 0.43763(13) | 0.39526(12) | 0.0423(5)  |
| O1 | 0.4124(4) | 0.92214(16) | 0.44969(18) | 0.0965(9)  |
| O2 | 0.1968(2) | 0.40252(11) | 0.38865(12) | 0.0541(5)  |
| O3 | 0.7226(2) | 0.51224(12) | 0.40155(12) | 0.0567(5)  |
| C1 | 0.1636(3) | 0.10507(15) | 0.41148(14) | 0.0450(6)  |
| C2 | 0.9881(3) | 0.12482(19) | 0.40805(18) | 0.0592(7)  |
| C3 | 0.8887(4) | 0.0658(3)   | 0.3582(2)   | 0.0829(11) |
| C4 | 0.9525(5) | 0.0604(3)   | 0.2809(2)   | 0.0902(13) |
| C5 | 0.1215(5) | 0.0289(2)   | 0.28567(18) | 0.0763(11) |

## S21

|     |           |             |             |            |
|-----|-----------|-------------|-------------|------------|
| C6  | 0.2283(4) | 0.08500(18) | 0.33462(16) | 0.0606(8)  |
| C7  | 0.2650(4) | 0.17143(17) | 0.30006(15) | 0.0561(7)  |
| C8  | 0.2580(3) | 0.23632(16) | 0.36431(14) | 0.0464(6)  |
| C9  | 0.2587(3) | 0.18312(16) | 0.43618(14) | 0.0496(6)  |
| C10 | 0.3798(4) | 0.0327(2)   | 0.3561(2)   | 0.0737(9)  |
| C11 | 0.3418(4) | 0.98445(18) | 0.4255(2)   | 0.0652(8)  |
| C12 | 0.2084(4) | 0.02703(18) | 0.46021(17) | 0.0608(8)  |
| C13 | 0.3348(3) | 0.38204(15) | 0.38412(13) | 0.0411(6)  |
| C14 | 0.4514(3) | 0.52415(15) | 0.40908(12) | 0.0392(5)  |
| C15 | 0.5985(3) | 0.56472(16) | 0.41149(14) | 0.0451(6)  |
| C16 | 0.6081(3) | 0.65029(17) | 0.42117(15) | 0.0520(7)  |
| C17 | 0.4725(4) | 0.69672(17) | 0.42946(15) | 0.0530(7)  |
| C18 | 0.3273(3) | 0.65832(16) | 0.42929(14) | 0.0468(6)  |
| C19 | 0.3180(3) | 0.57098(16) | 0.41942(13) | 0.0433(6)  |
| C20 | 0.8757(4) | 0.5477(3)   | 0.4045(3)   | 0.0830(11) |
| C21 | 0.1803(4) | 0.70903(19) | 0.4394(2)   | 0.0659(8)  |
| C22 | 0.5443(3) | 0.27650(16) | 0.36937(15) | 0.0454(6)  |
| C23 | 0.6358(3) | 0.30644(15) | 0.30447(15) | 0.0453(6)  |
| C24 | 0.7924(3) | 0.33020(19) | 0.31714(17) | 0.0561(7)  |
| C25 | 0.8798(4) | 0.3545(2)   | 0.25815(19) | 0.0646(8)  |
| C26 | 0.8111(4) | 0.35490(19) | 0.18602(18) | 0.0622(8)  |
| C27 | 0.6553(4) | 0.33217(19) | 0.17291(17) | 0.0581(7)  |
| C28 | 0.5672(3) | 0.30840(17) | 0.23149(15) | 0.0519(7)  |

Table S12. Bond lengths (Å) for *anti*-**21**.

|        |          |        |          |
|--------|----------|--------|----------|
| N1-C13 | 1.378(3) | N1-C22 | 1.452(3) |
| N1-C8  | 1.468(3) | N2-C13 | 1.368(3) |
| N2-C14 | 1.400(3) | N2-H01 | 0.87(4)  |
| O1-C11 | 1.222(4) | O2-C13 | 1.227(3) |
| O3-C15 | 1.367(3) | O3-C20 | 1.417(3) |
| C1-C2  | 1.523(4) | C1-C9  | 1.530(3) |
| C1-C12 | 1.548(4) | C1-C6  | 1.550(3) |

## S22

|          |          |          |          |
|----------|----------|----------|----------|
| C2-C3    | 1.510(5) | C2-H2A   | 0.98     |
| C2-H2B   | 0.98     | C3-C4    | 1.524(5) |
| C3-H3A   | 0.98     | C3-H3B   | 0.98     |
| C4-C5    | 1.519(6) | C4-H4A   | 0.98     |
| C4-H4B   | 0.98     | C5-C6    | 1.508(4) |
| C5-H5A   | 0.98     | C5-H5B   | 0.98     |
| C6-C7    | 1.548(4) | C6-C10   | 1.559(5) |
| C7-C8    | 1.549(4) | C7-H7A   | 0.98     |
| C7-H7B   | 0.98     | C8-C9    | 1.538(4) |
| C8-H8    | 0.99     | C9-H9A   | 0.98     |
| C9-H9B   | 0.98     | C10-C11  | 1.514(5) |
| C10-H10A | 0.98     | C10-H10B | 0.98     |
| C11-C12  | 1.495(4) | C12-H12A | 0.98     |
| C12-H12B | 0.98     | C14-C19  | 1.381(3) |
| C14-C15  | 1.406(3) | C15-C16  | 1.374(4) |
| C16-C17  | 1.387(4) | C16-H16  | 0.94     |
| C17-C18  | 1.378(4) | C17-H17  | 0.94     |
| C18-C19  | 1.402(4) | C18-C21  | 1.510(4) |
| C19-H19  | 0.94     | C20-H20A | 0.97     |
| C20-H20B | 0.97     | C20-H20C | 0.97     |
| C21-H21A | 0.97     | C21-H21B | 0.97     |
| C21-H21C | 0.97     | C22-C23  | 1.520(4) |
| C22-H22A | 0.98     | C22-H22B | 0.98     |
| C23-C24  | 1.389(4) | C23-C28  | 1.391(4) |
| C24-C25  | 1.389(4) | C24-H24  | 0.94     |
| C25-C26  | 1.377(5) | C25-H25  | 0.94     |
| C26-C27  | 1.378(4) | C26-H26  | 0.94     |
| C27-C28  | 1.384(4) | C27-H27  | 0.94     |
| C28-H28  | 0.94     |          |          |

Table S13. Bond angles (°) for *anti*-**21**.

|               |          |               |          |
|---------------|----------|---------------|----------|
| C13-N1-C22    | 122.1(2) | C13-N1-C8     | 117.0(2) |
| C22-N1-C8     | 118.8(2) | C13-N2-C14    | 128.8(2) |
| C13-N2-H01    | 118.(2)  | C14-N2-H01    | 112.(2)  |
| C15-O3-C20    | 117.9(2) | C2-C1-C9      | 110.0(2) |
| C2-C1-C12     | 112.9(2) | C9-C1-C12     | 112.6(2) |
| C2-C1-C6      | 114.6(2) | C9-C1-C6      | 102.0(2) |
| C12-C1-C6     | 104.2(2) | C3-C2-C1      | 113.6(3) |
| C3-C2-H2A     | 108.8    | C1-C2-H2A     | 108.8    |
| C3-C2-H2B     | 108.8    | C1-C2-H2B     | 108.8    |
| H2A-C2-H2B    | 107.7    | C2-C3-C4      | 110.5(3) |
| C2-C3-H3A     | 109.5    | C4-C3-H3A     | 109.5    |
| C2-C3-H3B     | 109.5    | C4-C3-H3B     | 109.5    |
| H3A-C3-H3B    | 108.1    | C5-C4-C3      | 111.4(3) |
| C5-C4-H4A     | 109.3    | C3-C4-H4A     | 109.3    |
| C5-C4-H4B     | 109.3    | C3-C4-H4B     | 109.3    |
| H4A-C4-H4B    | 108.0    | C6-C5-C4      | 111.4(3) |
| C6-C5-H5A     | 109.3    | C4-C5-H5A     | 109.3    |
| C6-C5-H5B     | 109.3    | C4-C5-H5B     | 109.3    |
| H5A-C5-H5B    | 108.0    | C5-C6-C7      | 115.1(3) |
| C5-C6-C1      | 113.5(2) | C7-C6-C1      | 105.4(2) |
| C5-C6-C10     | 106.3(3) | C7-C6-C10     | 112.6(3) |
| C1-C6-C10     | 103.4(2) | C6-C7-C8      | 106.0(2) |
| C6-C7-H7A     | 110.5    | C8-C7-H7A     | 110.5    |
| C6-C7-H7B     | 110.5    | C8-C7-H7B     | 110.5    |
| H7A-C7-H7B    | 108.7    | N1-C8-C9      | 114.2(2) |
| N1-C8-C7      | 115.1(2) | C9-C8-C7      | 104.8(2) |
| N1-C8-H8      | 107.4    | C9-C8-H8      | 107.4    |
| C7-C8-H8      | 107.4    | C1-C9-C8      | 103.6(2) |
| C1-C9-H9A     | 111.0    | C8-C9-H9A     | 111.0    |
| C1-C9-H9B     | 111.0    | C8-C9-H9B     | 111.0    |
| H9A-C9-H9B    | 109.0    | C11-C10-C6    | 104.5(3) |
| C11-C10-H10A  | 110.8    | C6-C10-H10A   | 110.8    |
| C11-C10-H10B  | 110.8    | C6-C10-H10B   | 110.8    |
| H10A-C10-H10B | 108.9    | O1-C11-C12    | 126.2(3) |
| O1-C11-C10    | 124.9(3) | C12-C11-C10   | 108.9(3) |
| C11-C12-C1    | 107.1(2) | C11-C12-H12A  | 110.3    |
| C1-C12-H12A   | 110.3    | C11-C12-H12B  | 110.3    |
| C1-C12-H12B   | 110.3    | H12A-C12-H12B | 108.6    |
| O2-C13-N2     | 122.6(2) | O2-C13-N1     | 123.1(2) |
| N2-C13-N1     | 114.3(2) | C19-C14-N2    | 126.3(2) |

## S24

|               |          |               |          |
|---------------|----------|---------------|----------|
| C19-C14-C15   | 119.1(2) | N2-C14-C15    | 114.5(2) |
| O3-C15-C16    | 125.6(2) | O3-C15-C14    | 114.2(2) |
| C16-C15-C14   | 120.2(2) | C15-C16-C17   | 119.9(2) |
| C15-C16-H16   | 120.0    | C17-C16-H16   | 120.0    |
| C18-C17-C16   | 121.1(2) | C18-C17-H17   | 119.5    |
| C16-C17-H17   | 119.5    | C17-C18-C19   | 118.8(2) |
| C17-C18-C21   | 120.9(2) | C19-C18-C21   | 120.3(3) |
| C14-C19-C18   | 120.8(2) | C14-C19-H19   | 119.6    |
| C18-C19-H19   | 119.6    | O3-C20-H20A   | 109.5    |
| O3-C20-H20B   | 109.5    | H20A-C20-H20B | 109.5    |
| O3-C20-H20C   | 109.5    | H20A-C20-H20C | 109.5    |
| H20B-C20-H20C | 109.5    | C18-C21-H21A  | 109.5    |
| C18-C21-H21B  | 109.5    | H21A-C21-H21B | 109.5    |
| C18-C21-H21C  | 109.5    | H21A-C21-H21C | 109.5    |
| H21B-C21-H21C | 109.5    | N1-C22-C23    | 115.4(2) |
| N1-C22-H22A   | 108.4    | C23-C22-H22A  | 108.4    |
| N1-C22-H22B   | 108.4    | C23-C22-H22B  | 108.4    |
| H22A-C22-H22B | 107.5    | C24-C23-C28   | 118.7(3) |
| C24-C23-C22   | 120.0(2) | C28-C23-C22   | 121.4(2) |
| C25-C24-C23   | 120.8(3) | C25-C24-H24   | 119.6    |
| C23-C24-H24   | 119.6    | C26-C25-C24   | 119.9(3) |
| C26-C25-H25   | 120.1    | C24-C25-H25   | 120.1    |
| C25-C26-C27   | 119.8(3) | C25-C26-H26   | 120.1    |
| C27-C26-H26   | 120.1    | C26-C27-C28   | 120.7(3) |
| C26-C27-H27   | 119.7    | C28-C27-H27   | 119.7    |
| C27-C28-C23   | 120.2(3) | C27-C28-H28   | 119.9    |
| C23-C28-H28   | 119.9    |               |          |

Table S14. Torsion angles (°) for *anti*-**21**.

|              |           |               |           |
|--------------|-----------|---------------|-----------|
| C9-C1-C2-C3  | 158.3(3)  | C12-C1-C2-C3  | -75.1(3)  |
| C6-C1-C2-C3  | 44.0(3)   | C1-C2-C3-C4   | -52.0(4)  |
| C2-C3-C4-C5  | 59.4(5)   | C3-C4-C5-C6   | -58.3(4)  |
| C4-C5-C6-C7  | -72.5(3)  | C4-C5-C6-C1   | 49.1(4)   |
| C4-C5-C6-C10 | 162.0(3)  | C2-C1-C6-C5   | -42.4(4)  |
| C9-C1-C6-C5  | -161.2(3) | C12-C1-C6-C5  | 81.5(3)   |
| C2-C1-C6-C7  | 84.5(3)   | C9-C1-C6-C7   | -34.3(3)  |
| C12-C1-C6-C7 | -151.7(3) | C2-C1-C6-C10  | -157.1(2) |
| C9-C1-C6-C10 | 84.1(3)   | C12-C1-C6-C10 | -33.2(3)  |
| C5-C6-C7-C8  | 138.7(3)  | C1-C6-C7-C8   | 12.8(3)   |
| C10-C6-C7-C8 | -99.2(3)  | C13-N1-C8-C9  | -98.1(3)  |



|                 |           |                 |           |
|-----------------|-----------|-----------------|-----------|
| C22-N1-C8-C9    | 65.8(3)   | C13-N1-C8-C7    | 140.6(2)  |
| C22-N1-C8-C7    | -55.5(3)  | C6-C7-C8-N1     | 139.9(3)  |
| C6-C7-C8-C9     | 13.6(3)   | C2-C1-C9-C8     | -79.1(3)  |
| C12-C1-C9-C8    | 154.0(2)  | C6-C1-C9-C8     | 42.9(3)   |
| N1-C8-C9-C1     | -162.2(2) | C7-C8-C9-C1     | -35.3(3)  |
| C5-C6-C10-C11   | -86.9(3)  | C7-C6-C10-C11   | 146.1(3)  |
| C1-C6-C10-C11   | 32.9(3)   | C6-C10-C11-O1   | 161.6(3)  |
| C6-C10-C11-C12  | -20.1(4)  | O1-C11-C12-C1   | 177.4(3)  |
| C10-C11-C12-C1  | -0.9(4)   | C2-C1-C12-C11   | 146.5(3)  |
| C9-C1-C12-C11   | -88.2(3)  | C6-C1-C12-C11   | 21.5(3)   |
| C14-N2-C13-O2   | -3.6(4)   | C14-N2-C13-N1   | 175.3(2)  |
| C22-N1-C13-O2   | -173.0(2) | C8-N1-C13-O2    | -9.7(4)   |
| C22-N1-C13-N2   | 8.1(3)    | C8-N1-C13-N2    | 171.3(2)  |
| C13-N2-C14-C19  | 4.7(4)    | C13-N2-C14-C15  | -174.7(2) |
| C20-O3-C15-C16  | 2.9(4)    | C20-O3-C15-C14  | -178.9(3) |
| C19-C14-C15-O3  | 179.2(2)  | N2-C14-C15-O3   | -1.4(3)   |
| C19-C14-C15-C16 | -2.5(4)   | N2-C14-C15-C16  | 177.0(2)  |
| O3-C15-C16-C17  | 178.9(2)  | C14-C15-C16-C17 | 0.8(4)    |
| C15-C16-C17-C18 | 1.0(4)    | C16-C17-C18-C19 | -0.9(4)   |
| C16-C17-C18-C21 | 179.2(3)  | N2-C14-C19-C18  | -176.9(2) |
| C15-C14-C19-C18 | 2.5(4)    | C17-C18-C19-C14 | -0.8(4)   |
| C21-C18-C19-C14 | 179.1(2)  | C13-N1-C22-C23  | -76.9(3)  |
| C8-N1-C22-C23   | 120.2(2)  | N1-C22-C23-C24  | 143.3(2)  |
| N1-C22-C23-C28  | -38.6(3)  | C28-C23-C24-C25 | -0.7(4)   |
| C22-C23-C24-C25 | 177.4(3)  | C23-C24-C25-C26 | -0.3(5)   |
| C24-C25-C26-C27 | 0.8(5)    | C25-C26-C27-C28 | -0.4(5)   |
| C26-C27-C28-C23 | -0.6(4)   | C24-C23-C28-C27 | 1.2(4)    |
| C22-C23-C28-C27 | -176.9(2) |                 |           |

Table 15. Anisotropic atomic displacement parameters ( $\text{\AA}^2$ ) for *anti*-**21**.

The anisotropic atomic displacement factor exponent takes the form:  $-2\pi^2 [h^2 a^{*2} U_{11} + \dots + 2 h k a^* b^* U_{12}]$

|    | $U_{11}$   | $U_{22}$   | $U_{33}$   | $U_{23}$   | $U_{13}$   | $U_{12}$   |
|----|------------|------------|------------|------------|------------|------------|
| N1 | 0.0455(11) | 0.0352(10) | 0.0496(12) | -0.0023(9) | 0.0091(9)  | -0.0064(9) |
| N2 | 0.0393(12) | 0.0352(11) | 0.0526(12) | -0.0036(9) | 0.0042(9)  | -0.0040(9) |
| O1 | 0.107(2)   | 0.0619(15) | 0.121(2)   | 0.0118(14) | 0.0112(17) | 0.0179(14) |
| O2 | 0.0411(10) | 0.0447(10) | 0.0768(13) | -0.0103(9) | 0.0053(9)  | -0.0048(8) |
| O3 | 0.0401(10) | 0.0526(11) | 0.0782(14) | -0.0110(9) | 0.0092(9)  | -0.0077(8) |

## S26

|     |            |            |            |             |             |             |
|-----|------------|------------|------------|-------------|-------------|-------------|
| C1  | 0.0562(15) | 0.0382(13) | 0.0421(13) | -0.0037(10) | 0.0141(11)  | -0.0065(11) |
| C2  | 0.0612(17) | 0.0529(16) | 0.0651(18) | -0.0018(13) | 0.0156(14)  | -0.0097(13) |
| C3  | 0.065(2)   | 0.102(3)   | 0.082(2)   | 0.007(2)    | 0.0047(17)  | -0.029(2)   |
| C4  | 0.106(3)   | 0.106(3)   | 0.057(2)   | 0.0044(19)  | -0.0087(19) | -0.042(2)   |
| C5  | 0.113(3)   | 0.067(2)   | 0.0508(17) | -0.0112(15) | 0.0190(17)  | -0.038(2)   |
| C6  | 0.088(2)   | 0.0478(15) | 0.0492(15) | -0.0108(12) | 0.0270(15)  | -0.0236(15) |
| C7  | 0.079(2)   | 0.0472(15) | 0.0434(14) | -0.0047(11) | 0.0148(13)  | -0.0201(14) |
| C8  | 0.0539(15) | 0.0390(13) | 0.0471(14) | -0.0030(11) | 0.0090(11)  | -0.0117(11) |
| C9  | 0.0616(16) | 0.0449(14) | 0.0436(14) | -0.0054(11) | 0.0122(12)  | -0.0092(12) |
| C10 | 0.083(2)   | 0.0538(18) | 0.088(2)   | -0.0078(16) | 0.0340(19)  | 0.0024(16)  |
| C11 | 0.078(2)   | 0.0391(15) | 0.079(2)   | 0.0049(14)  | 0.0108(16)  | 0.0021(14)  |
| C12 | 0.077(2)   | 0.0481(16) | 0.0589(17) | 0.0057(13)  | 0.0161(15)  | -0.0035(14) |
| C13 | 0.0418(13) | 0.0379(13) | 0.0437(13) | -0.0012(10) | 0.0038(10)  | -0.0044(10) |
| C14 | 0.0450(13) | 0.0371(12) | 0.0353(12) | -0.0008(9)  | 0.0007(10)  | -0.0041(10) |
| C15 | 0.0462(14) | 0.0440(14) | 0.0454(14) | -0.0039(11) | 0.0060(11)  | -0.0079(11) |
| C16 | 0.0563(16) | 0.0453(15) | 0.0551(16) | -0.0050(12) | 0.0080(12)  | -0.0151(12) |
| C17 | 0.0701(18) | 0.0368(13) | 0.0519(15) | -0.0038(11) | 0.0036(13)  | -0.0087(12) |
| C18 | 0.0567(15) | 0.0421(13) | 0.0409(13) | -0.0040(10) | -0.0010(11) | 0.0012(11)  |
| C19 | 0.0446(13) | 0.0427(13) | 0.0421(13) | -0.0020(10) | -0.0008(10) | -0.0033(10) |
| C20 | 0.0437(17) | 0.079(2)   | 0.127(3)   | -0.018(2)   | 0.0117(18)  | -0.0168(16) |
| C21 | 0.0664(19) | 0.0491(16) | 0.081(2)   | -0.0100(15) | -0.0049(16) | 0.0104(14)  |
| C22 | 0.0490(14) | 0.0383(13) | 0.0497(14) | 0.0025(10)  | 0.0085(11)  | 0.0024(11)  |
| C23 | 0.0494(14) | 0.0365(13) | 0.0509(15) | -0.0009(10) | 0.0105(11)  | 0.0015(11)  |
| C24 | 0.0516(16) | 0.0569(16) | 0.0597(17) | 0.0029(13)  | 0.0034(13)  | 0.0006(13)  |
| C25 | 0.0487(16) | 0.070(2)   | 0.077(2)   | 0.0045(16)  | 0.0156(14)  | -0.0040(14) |
| C26 | 0.0689(19) | 0.0568(17) | 0.0643(19) | 0.0009(14)  | 0.0281(15)  | -0.0016(14) |
| C27 | 0.0718(19) | 0.0548(16) | 0.0491(16) | -0.0010(12) | 0.0135(13)  | -0.0084(14) |
| C28 | 0.0577(16) | 0.0473(15) | 0.0510(15) | -0.0015(12) | 0.0072(12)  | -0.0095(12) |

Table S16. Hydrogen atomic coordinates and isotropic atomic displacement parameters ( $\text{\AA}^2$ ) for *anti*-**21**.

|      | x/a      | y/b      | z/c        | U(eq)     |
|------|----------|----------|------------|-----------|
| H01  | 0.551(4) | 0.421(2) | 0.3869(19) | 0.068(10) |
| H2A  | -0.0477  | 0.1222   | 0.4589     | 0.071     |
| H2B  | -0.0284  | 0.1824   | 0.3897     | 0.071     |
| H3A  | -0.2203  | 0.0861   | 0.3533     | 0.099     |
| H3B  | -0.1108  | 0.0098   | 0.3810     | 0.099     |
| H4A  | -0.1138  | 0.0222   | 0.2493     | 0.108     |
| H4B  | -0.0522  | 0.1160   | 0.2574     | 0.108     |
| H5A  | 0.1251   | -0.0283  | 0.3061     | 0.092     |
| H5B  | 0.1592   | 0.0268   | 0.2352     | 0.092     |
| H7A  | 0.1870   | 0.1850   | 0.2588     | 0.067     |
| H7B  | 0.3699   | 0.1711   | 0.2807     | 0.067     |
| H8   | 0.1545   | 0.2648   | 0.3578     | 0.056     |
| H9A  | 0.3665   | 0.1680   | 0.4543     | 0.06      |
| H9B  | 0.2087   | 0.2134   | 0.4759     | 0.06      |
| H10A | 0.4028   | -0.0058  | 0.3155     | 0.088     |
| H10B | 0.4708   | 0.0697   | 0.3669     | 0.088     |
| H12A | 0.2405   | 0.0441   | 0.5117     | 0.073     |
| H12B | 0.1182   | -0.0112  | 0.4613     | 0.073     |
| H16  | 0.7065   | 0.6773   | 0.4222     | 0.062     |
| H17  | 0.4797   | 0.7554   | 0.4353     | 0.064     |
| H19  | 0.2198   | 0.5440   | 0.4198     | 0.052     |
| H20A | 0.8830   | 0.5864   | 0.3630     | 0.124     |
| H20B | 0.9530   | 0.5033   | 0.4012     | 0.124     |
| H20C | 0.8959   | 0.5777   | 0.4515     | 0.124     |
| H21A | 0.2079   | 0.7679   | 0.4458     | 0.099     |
| H21B | 0.1310   | 0.6892   | 0.4833     | 0.099     |
| H21C | 0.1074   | 0.7026   | 0.3955     | 0.099     |
| H22A | 0.5492   | 0.2150   | 0.3712     | 0.055     |
| H22B | 0.5969   | 0.2978   | 0.4161     | 0.055     |
| H24  | 0.8400   | 0.3298   | 0.3662     | 0.067     |
| H25  | 0.9857   | 0.3707   | 0.2674     | 0.078     |
| H26  | 0.8703   | 0.3706   | 0.1459     | 0.075     |
| H27  | 0.6084   | 0.3328   | 0.1237     | 0.07      |
| H28  | 0.4607   | 0.2935   | 0.2219     | 0.062     |

Table S17. Hydrogen bond distances ( $\text{\AA}$ ) and angles ( $^\circ$ ) for *anti*-**21**.

|             | Donor-H | Acceptor-H | Donor-Acceptor | Angle   |
|-------------|---------|------------|----------------|---------|
| N2-H01...O3 | 0.87(4) | 2.06(3)    | 2.549(3)       | 114.(3) |

### 3.4. X-ray crystal structure of *syn,anti*-**22**

Compound *syn,anti*-**22** was crystallized from EtOAc. Colorless crystals. Code DAN6941.

*X-ray crystal structure analysis of syn,anti-22 (dan6941)*: A colorless plate-like specimen of  $C_{28}H_{36}N_2O_3$ , approximate dimensions 0.150 mm x 0.170 mm x 0.270 mm, was used for the X-ray crystallographic analysis. The X-ray intensity data were measured.

The integration of the data using a monoclinic unit cell yielded a total of 4152 reflections to a maximum  $\theta$  angle of  $67.18^\circ$  (0.84 Å resolution), of which 4152 were independent (average redundancy 1.000, completeness = 96.1%,  $R_{sig} = 2.57\%$ ) and 3721 (89.62%) were greater than  $2\sigma(F^2)$ .

The final cell constants of  $a = 7.5886(3)$  Å,  $b = 16.0072(4)$  Å,  $c = 20.2378(5)$  Å,  $\beta = 100.377(2)^\circ$ , volume =  $2418.12(13)$  Å<sup>3</sup>, are based upon the refinement of the XYZ-centroids of reflections above  $20\sigma(I)$ . Data were corrected for absorption effects using the multi-scan method (SADABS). The calculated minimum and maximum transmission coefficients (based on crystal size) are 0.8490 and 0.9120.

The structure was solved and refined using the Bruker SHELXTL Software Package, using the space group  $P 1 2_1/c 1$ , with  $Z = 4$  for the formula unit,  $C_{28}H_{36}N_2O_3$ . The final anisotropic full-matrix least-squares refinement on  $F^2$  with 307 variables converged at  $R1 = 4.36\%$ , for the observed data and  $wR2 = 11.81\%$  for all data. The goodness-of-fit was 1.031. The largest peak in the final difference electron density synthesis was  $0.175 e^-/\text{\AA}^3$  and the largest hole was  $-0.164 e^-/\text{\AA}^3$  with an RMS deviation of  $0.032 e^-/\text{\AA}^3$ . On the basis of the final model, the calculated density was  $1.232 \text{ g/cm}^3$  and  $F(000)$ , 968  $e^-$ . CCDC number: 2073468.

## S29

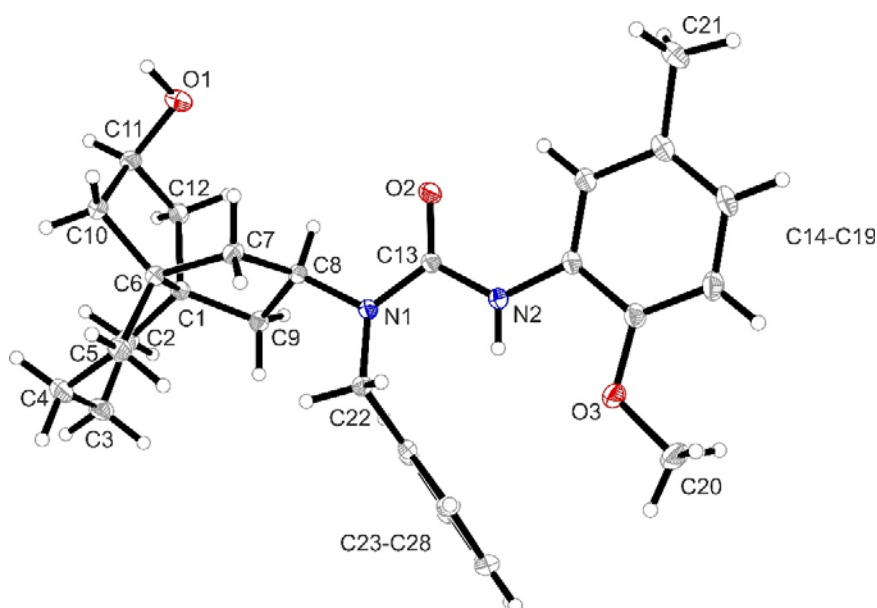Table S18. Sample and crystal data for *syn,anti*-**22**.

|                        |                              |                            |
|------------------------|------------------------------|----------------------------|
| Identification code    | dan6941                      |                            |
| Chemical formula       | $C_{28}H_{36}N_2O_3$         |                            |
| Formula weight         | 448.59 g/mol                 |                            |
| Temperature            | 223(2) K                     |                            |
| Wavelength             | 1.54178 Å                    |                            |
| Crystal size           | 0.150 x 0.170 x 0.270 mm     |                            |
| Crystal habit          | colorless plate              |                            |
| Crystal system         | monoclinic                   |                            |
| Space group            | P 1 21/c 1                   |                            |
| Unit cell dimensions   | $a = 7.5886(3)$ Å            | $\alpha = 90^\circ$        |
|                        | $b = 16.0072(4)$ Å           | $\beta = 100.377(2)^\circ$ |
|                        | $c = 20.2378(5)$ Å           | $\gamma = 90^\circ$        |
| Volume                 | $2418.12(13)$ Å <sup>3</sup> |                            |
| Z                      | 4                            |                            |
| Density (calculated)   | 1.232 g/cm <sup>3</sup>      |                            |
| Absorption coefficient | 0.628 mm <sup>-1</sup>       |                            |
| F(000)                 | 968                          |                            |

Table S19. Data collection and structure refinement for *syn,anti-22*.

|                                 |                                                                                                       |
|---------------------------------|-------------------------------------------------------------------------------------------------------|
| Theta range for data collection | 5.23 to 67.18°                                                                                        |
| Reflections collected           | 4152                                                                                                  |
| Absorption correction           | multi-scan                                                                                            |
| Max. and min. transmission      | 0.9120 and 0.8490                                                                                     |
| Structure solution technique    | direct methods                                                                                        |
| Structure solution program      | SHELXL-2014/7 (Sheldrick, 2014)                                                                       |
| Refinement method               | Full-matrix least-squares on $F^2$                                                                    |
| Refinement program              | SHELXL-2014/7 (Sheldrick, 2014)                                                                       |
| Function minimized              | $\sum w(F_o^2 - F_c^2)^2$                                                                             |
| Data / restraints / parameters  | 4152 / 0 / 307                                                                                        |
| Goodness-of-fit on $F^2$        | 1.031                                                                                                 |
| Final R indices                 | 3721 data; $I > 2\sigma(I)$ $R1 = 0.0436$ , $wR2 = 0.1133$<br>all data $R1 = 0.0482$ , $wR2 = 0.1181$ |
| Weighting scheme                | $w = 1/[\sigma^2(F_o^2) + (0.0599P)^2 + 0.6637P]$<br>where $P = (F_o^2 + 2F_c^2)/3$                   |
| Largest diff. peak and hole     | 0.175 and -0.164 eÅ <sup>-3</sup>                                                                     |
| R.M.S. deviation from mean      | 0.032 eÅ <sup>-3</sup>                                                                                |

Table S20. Atomic coordinates and equivalent isotropic atomic displacement parameters (Å<sup>2</sup>) for *syn,anti-22*.

U(eq) is defined as one third of the trace of the orthogonalized  $U_{ij}$  tensor.

|    | x/a         | y/b         | z/c         | U(eq)     |
|----|-------------|-------------|-------------|-----------|
| N1 | 0.52565(15) | 0.45528(7)  | 0.36735(6)  | 0.0391(3) |
| N2 | 0.45828(18) | 0.31450(8)  | 0.36886(6)  | 0.0438(3) |
| O1 | 0.10164(18) | 0.59954(8)  | 0.46807(8)  | 0.0700(4) |
| O2 | 0.74762(14) | 0.35862(7)  | 0.39639(6)  | 0.0522(3) |
| O3 | 0.17642(15) | 0.22331(7)  | 0.33623(6)  | 0.0568(3) |
| C1 | 0.73000(18) | 0.66687(9)  | 0.35816(7)  | 0.0386(3) |
| C2 | 0.6781(2)   | 0.75064(10) | 0.32314(9)  | 0.0527(4) |
| C3 | 0.4991(2)   | 0.78594(11) | 0.33289(10) | 0.0647(5) |
| C4 | 0.4936(3)   | 0.79321(12) | 0.40727(11) | 0.0659(5) |

## S31

|     |             |             |             |           |
|-----|-------------|-------------|-------------|-----------|
| C5  | 0.5204(2)   | 0.70788(11) | 0.44005(8)  | 0.0520(4) |
| C6  | 0.69374(19) | 0.66362(9)  | 0.43156(7)  | 0.0386(3) |
| C7  | 0.6761(2)   | 0.56898(9)  | 0.44542(7)  | 0.0426(3) |
| C8  | 0.65820(18) | 0.52341(9)  | 0.37733(7)  | 0.0385(3) |
| C9  | 0.6254(2)   | 0.59227(9)  | 0.32397(7)  | 0.0406(3) |
| C10 | 0.8626(2)   | 0.70253(10) | 0.47289(8)  | 0.0469(4) |
| C11 | 0.0186(2)   | 0.67428(10) | 0.43986(9)  | 0.0510(4) |
| C12 | 0.9360(2)   | 0.65542(10) | 0.36673(8)  | 0.0474(4) |
| C13 | 0.58681(19) | 0.37553(9)  | 0.37880(7)  | 0.0388(3) |
| C14 | 0.4794(2)   | 0.22892(9)  | 0.38484(7)  | 0.0406(3) |
| C15 | 0.3246(2)   | 0.18021(10) | 0.36740(7)  | 0.0461(4) |
| C16 | 0.3298(3)   | 0.09611(10) | 0.38245(9)  | 0.0584(4) |
| C17 | 0.4869(3)   | 0.06016(10) | 0.41626(9)  | 0.0589(4) |
| C18 | 0.6390(2)   | 0.10712(10) | 0.43552(8)  | 0.0494(4) |
| C19 | 0.6347(2)   | 0.19194(9)  | 0.41877(7)  | 0.0445(3) |
| C20 | 0.0111(3)   | 0.17978(14) | 0.32061(11) | 0.0731(6) |
| C21 | 0.8080(3)   | 0.07034(11) | 0.47615(9)  | 0.0639(5) |
| C22 | 0.33739(18) | 0.47587(9)  | 0.36664(7)  | 0.0400(3) |
| C23 | 0.20999(19) | 0.45528(9)  | 0.30225(7)  | 0.0402(3) |
| C24 | 0.2517(2)   | 0.46987(10) | 0.23931(8)  | 0.0502(4) |
| C25 | 0.1275(3)   | 0.45204(11) | 0.18211(9)  | 0.0638(5) |
| C26 | 0.9620(3)   | 0.41952(12) | 0.18715(11) | 0.0712(6) |
| C27 | 0.9204(2)   | 0.40490(12) | 0.24914(11) | 0.0674(5) |
| C28 | 0.0438(2)   | 0.42204(10) | 0.30640(9)  | 0.0522(4) |

Table S21. Bond lengths (Å) for *syn,anti*-**22**.

|        |            |        |            |
|--------|------------|--------|------------|
| N1-C13 | 1.3638(18) | N1-C22 | 1.4637(17) |
| N1-C8  | 1.4726(17) | N2-C13 | 1.3696(19) |
| N2-C14 | 1.4099(19) | N2-H02 | 0.84(2)    |
| O1-C11 | 1.423(2)   | O1-H01 | 0.97(2)    |
| O2-C13 | 1.2380(17) | O3-C15 | 1.3724(19) |
| O3-C20 | 1.420(2)   | C1-C9  | 1.529(2)   |

## S32

|          |            |          |            |
|----------|------------|----------|------------|
| C1-C2    | 1.535(2)   | C1-C12   | 1.552(2)   |
| C1-C6    | 1.5594(19) | C2-C3    | 1.517(2)   |
| C2-H2A   | 0.98       | C2-H2B   | 0.98       |
| C3-C4    | 1.518(3)   | C3-H3A   | 0.98       |
| C3-H3B   | 0.98       | C4-C5    | 1.516(3)   |
| C4-H4A   | 0.98       | C4-H4B   | 0.98       |
| C5-C6    | 1.531(2)   | C5-H5A   | 0.98       |
| C5-H5B   | 0.98       | C6-C10   | 1.531(2)   |
| C6-C7    | 1.551(2)   | C7-C8    | 1.543(2)   |
| C7-H7A   | 0.98       | C7-H7B   | 0.98       |
| C8-C9    | 1.5317(19) | C8-H8    | 0.99       |
| C9-H9A   | 0.98       | C9-H9B   | 0.98       |
| C10-C11  | 1.529(2)   | C10-H10A | 0.98       |
| C10-H10B | 0.98       | C11-C12  | 1.530(2)   |
| C11-H11  | 0.99       | C12-H12A | 0.98       |
| C12-H12B | 0.98       | C14-C19  | 1.385(2)   |
| C14-C15  | 1.401(2)   | C15-C16  | 1.379(2)   |
| C16-C17  | 1.389(3)   | C16-H16  | 0.94       |
| C17-C18  | 1.373(3)   | C17-H17  | 0.94       |
| C18-C19  | 1.398(2)   | C18-C21  | 1.512(2)   |
| C19-H19  | 0.94       | C20-H20A | 0.97       |
| C20-H20B | 0.97       | C20-H20C | 0.97       |
| C21-H21A | 0.97       | C21-H21B | 0.97       |
| C21-H21C | 0.97       | C22-C23  | 1.5125(19) |
| C22-H22A | 0.98       | C22-H22B | 0.98       |
| C23-C28  | 1.386(2)   | C23-C24  | 1.387(2)   |
| C24-C25  | 1.385(2)   | C24-H24  | 0.94       |
| C25-C26  | 1.381(3)   | C25-H25  | 0.94       |
| C26-C27  | 1.368(3)   | C26-H26  | 0.94       |
| C27-C28  | 1.380(2)   | C27-H27  | 0.94       |
| C28-H28  | 0.94       |          |            |



Table S22. Bond angles (°) for *syn,anti*-**22**.

|            |            |            |            |
|------------|------------|------------|------------|
| C13-N1-C22 | 120.93(12) | C13-N1-C8  | 117.82(11) |
| C22-N1-C8  | 118.42(11) | C13-N2-C14 | 127.66(13) |
| C13-N2-H02 | 117.2(13)  | C14-N2-H02 | 115.1(13)  |
| C11-O1-H01 | 105.5(14)  | C15-O3-C20 | 118.26(14) |
| C9-C1-C2   | 113.85(12) | C9-C1-C12  | 112.87(12) |
| C2-C1-C12  | 108.92(12) | C9-C1-C6   | 103.82(11) |
| C2-C1-C6   | 113.23(12) | C12-C1-C6  | 103.68(11) |
| C3-C2-C1   | 115.27(13) | C3-C2-H2A  | 108.5      |
| C1-C2-H2A  | 108.5      | C3-C2-H2B  | 108.5      |
| C1-C2-H2B  | 108.5      | H2A-C2-H2B | 107.5      |
| C2-C3-C4   | 110.05(14) | C2-C3-H3A  | 109.6      |
| C4-C3-H3A  | 109.6      | C2-C3-H3B  | 109.6      |
| C4-C3-H3B  | 109.6      | H3A-C3-H3B | 108.2      |
| C5-C4-C3   | 109.84(15) | C5-C4-H4A  | 109.7      |
| C3-C4-H4A  | 109.7      | C5-C4-H4B  | 109.7      |
| C3-C4-H4B  | 109.7      | H4A-C4-H4B | 108.2      |
| C4-C5-C6   | 114.73(14) | C4-C5-H5A  | 108.6      |
| C6-C5-H5A  | 108.6      | C4-C5-H5B  | 108.6      |
| C6-C5-H5B  | 108.6      | H5A-C5-H5B | 107.6      |
| C5-C6-C10  | 113.69(12) | C5-C6-C7   | 109.14(12) |
| C10-C6-C7  | 112.94(12) | C5-C6-C1   | 113.21(12) |
| C10-C6-C1  | 103.48(11) | C7-C6-C1   | 103.93(11) |
| C8-C7-C6   | 107.26(11) | C8-C7-H7A  | 110.3      |
| C6-C7-H7A  | 110.3      | C8-C7-H7B  | 110.3      |
| C6-C7-H7B  | 110.3      | H7A-C7-H7B | 108.5      |
| N1-C8-C9   | 114.58(11) | N1-C8-C7   | 114.86(11) |
| C9-C8-C7   | 105.44(11) | N1-C8-H8   | 107.2      |
| C9-C8-H8   | 107.2      | C7-C8-H8   | 107.2      |
| C1-C9-C8   | 103.76(11) | C1-C9-H9A  | 111.0      |
| C8-C9-H9A  | 111.0      | C1-C9-H9B  | 111.0      |
| C8-C9-H9B  | 111.0      | H9A-C9-H9B | 109.0      |

## S34

|               |            |               |            |
|---------------|------------|---------------|------------|
| C11-C10-C6    | 106.18(12) | C11-C10-H10A  | 110.5      |
| C6-C10-H10A   | 110.5      | C11-C10-H10B  | 110.5      |
| C6-C10-H10B   | 110.5      | H10A-C10-H10B | 108.7      |
| O1-C11-C10    | 113.27(14) | O1-C11-C12    | 107.28(13) |
| C10-C11-C12   | 105.46(12) | O1-C11-H11    | 110.2      |
| C10-C11-H11   | 110.2      | C12-C11-H11   | 110.2      |
| C11-C12-C1    | 108.29(12) | C11-C12-H12A  | 110.0      |
| C1-C12-H12A   | 110.0      | C11-C12-H12B  | 110.0      |
| C1-C12-H12B   | 110.0      | H12A-C12-H12B | 108.4      |
| O2-C13-N1     | 122.77(13) | O2-C13-N2     | 121.68(13) |
| N1-C13-N2     | 115.55(12) | C19-C14-C15   | 119.13(14) |
| C19-C14-N2    | 125.46(14) | C15-C14-N2    | 115.31(13) |
| O3-C15-C16    | 125.48(15) | O3-C15-C14    | 114.61(13) |
| C16-C15-C14   | 119.91(15) | C15-C16-C17   | 120.06(17) |
| C15-C16-H16   | 120.0      | C17-C16-H16   | 120.0      |
| C18-C17-C16   | 121.08(15) | C18-C17-H17   | 119.5      |
| C16-C17-H17   | 119.5      | C17-C18-C19   | 118.74(16) |
| C17-C18-C21   | 121.87(15) | C19-C18-C21   | 119.36(16) |
| C14-C19-C18   | 121.04(15) | C14-C19-H19   | 119.5      |
| C18-C19-H19   | 119.5      | O3-C20-H20A   | 109.5      |
| O3-C20-H20B   | 109.5      | H20A-C20-H20B | 109.5      |
| O3-C20-H20C   | 109.5      | H20A-C20-H20C | 109.5      |
| H20B-C20-H20C | 109.5      | C18-C21-H21A  | 109.5      |
| C18-C21-H21B  | 109.5      | H21A-C21-H21B | 109.5      |
| C18-C21-H21C  | 109.5      | H21A-C21-H21C | 109.5      |
| H21B-C21-H21C | 109.5      | N1-C22-C23    | 115.51(12) |
| N1-C22-H22A   | 108.4      | C23-C22-H22A  | 108.4      |
| N1-C22-H22B   | 108.4      | C23-C22-H22B  | 108.4      |
| H22A-C22-H22B | 107.5      | C28-C23-C24   | 118.79(14) |
| C28-C23-C22   | 118.62(14) | C24-C23-C22   | 122.58(14) |
| C25-C24-C23   | 119.97(17) | C25-C24-H24   | 120.0      |
| C23-C24-H24   | 120.0      | C26-C25-C24   | 120.50(18) |

|             |            |             |            |
|-------------|------------|-------------|------------|
| C26-C25-H25 | 119.8      | C24-C25-H25 | 119.8      |
| C27-C26-C25 | 119.72(17) | C27-C26-H26 | 120.1      |
| C25-C26-H26 | 120.1      | C26-C27-C28 | 120.16(19) |
| C26-C27-H27 | 119.9      | C28-C27-H27 | 119.9      |
| C27-C28-C23 | 120.86(18) | C27-C28-H28 | 119.6      |
| C23-C28-H28 | 119.6      |             |            |

Table S23. Torsion angles (°) for *syn,anti-22*.

|                |             |               |             |
|----------------|-------------|---------------|-------------|
| C9-C1-C2-C3    | 74.08(18)   | C12-C1-C2-C3  | -158.99(14) |
| C6-C1-C2-C3    | -44.20(19)  | C1-C2-C3-C4   | 55.0(2)     |
| C2-C3-C4-C5    | -59.5(2)    | C3-C4-C5-C6   | 56.9(2)     |
| C4-C5-C6-C10   | 71.62(18)   | C4-C5-C6-C7   | -161.31(14) |
| C4-C5-C6-C1    | -46.09(19)  | C9-C1-C6-C5   | -85.61(14)  |
| C2-C1-C6-C5    | 38.35(17)   | C12-C1-C6-C5  | 156.23(12)  |
| C9-C1-C6-C10   | 150.86(12)  | C2-C1-C6-C10  | -85.18(14)  |
| C12-C1-C6-C10  | 32.71(14)   | C9-C1-C6-C7   | 32.67(14)   |
| C2-C1-C6-C7    | 156.63(12)  | C12-C1-C6-C7  | -85.48(13)  |
| C5-C6-C7-C8    | 108.26(13)  | C10-C6-C7-C8  | -124.24(13) |
| C1-C6-C7-C8    | -12.80(14)  | C13-N1-C8-C9  | 138.94(13)  |
| C22-N1-C8-C9   | -59.89(16)  | C13-N1-C8-C7  | -98.74(15)  |
| C22-N1-C8-C7   | 62.44(16)   | C6-C7-C8-N1   | -138.91(12) |
| C6-C7-C8-C9    | -11.77(15)  | C2-C1-C9-C8   | -163.97(12) |
| C12-C1-C9-C8   | 71.19(14)   | C6-C1-C9-C8   | -40.41(14)  |
| N1-C8-C9-C1    | 159.57(11)  | C7-C8-C9-C1   | 32.27(14)   |
| C5-C6-C10-C11  | -159.30(13) | C7-C6-C10-C11 | 75.63(15)   |
| C1-C6-C10-C11  | -36.09(15)  | C6-C10-C11-O1 | -92.18(15)  |
| C6-C10-C11-C12 | 24.84(16)   | O1-C11-C12-C1 | 117.24(14)  |
| C10-C11-C12-C1 | -3.77(16)   | C9-C1-C12-C11 | -129.71(13) |
| C2-C1-C12-C11  | 102.81(14)  | C6-C1-C12-C11 | -18.03(15)  |
| C22-N1-C13-O2  | -161.40(13) | C8-N1-C13-O2  | -0.7(2)     |
| C22-N1-C13-N2  | 19.27(19)   | C8-N1-C13-N2  | 179.96(12)  |
| C14-N2-C13-O2  | 9.4(2)      | C14-N2-C13-N1 | -171.28(13) |

|                 |             |                 |             |
|-----------------|-------------|-----------------|-------------|
| C13-N2-C14-C19  | 5.2(2)      | C13-N2-C14-C15  | -178.46(14) |
| C20-O3-C15-C16  | 3.2(2)      | C20-O3-C15-C14  | -176.14(15) |
| C19-C14-C15-O3  | 177.65(13)  | N2-C14-C15-O3   | 1.10(19)    |
| C19-C14-C15-C16 | -1.7(2)     | N2-C14-C15-C16  | -178.30(14) |
| O3-C15-C16-C17  | -177.81(16) | C14-C15-C16-C17 | 1.5(3)      |
| C15-C16-C17-C18 | 0.3(3)      | C16-C17-C18-C19 | -1.8(3)     |
| C16-C17-C18-C21 | 176.10(16)  | C15-C14-C19-C18 | 0.2(2)      |
| N2-C14-C19-C18  | 176.37(14)  | C17-C18-C19-C14 | 1.6(2)      |
| C21-C18-C19-C14 | -176.40(14) | C13-N1-C22-C23  | -80.06(17)  |
| C8-N1-C22-C23   | 119.37(14)  | N1-C22-C23-C28  | 139.71(14)  |
| N1-C22-C23-C24  | -41.55(19)  | C28-C23-C24-C25 | 0.7(2)      |
| C22-C23-C24-C25 | -178.06(14) | C23-C24-C25-C26 | -0.2(3)     |
| C24-C25-C26-C27 | 0.1(3)      | C25-C26-C27-C28 | -0.4(3)     |
| C26-C27-C28-C23 | 0.9(3)      | C24-C23-C28-C27 | -1.1(2)     |
| C22-C23-C28-C27 | 177.73(15)  |                 |             |

Table S24. Anisotropic atomic displacement parameters ( $\text{\AA}^2$ ) for *syn,anti*-**22**.

The anisotropic atomic displacement factor exponent takes the form:  $-2\pi^2 [h^2 a^{*2} U_{11} + \dots + 2 h k a^* b^* U_{12}]$

|    | $U_{11}$   | $U_{22}$   | $U_{33}$   | $U_{23}$   | $U_{13}$   | $U_{12}$   |
|----|------------|------------|------------|------------|------------|------------|
| N1 | 0.0339(6)  | 0.0321(6)  | 0.0507(7)  | 0.0004(5)  | 0.0057(5)  | -0.0001(5) |
| N2 | 0.0410(7)  | 0.0327(6)  | 0.0543(7)  | 0.0053(5)  | -0.0007(6) | -0.0021(5) |
| O1 | 0.0562(8)  | 0.0626(8)  | 0.0850(9)  | 0.0073(7)  | -0.0041(6) | 0.0176(6)  |
| O2 | 0.0376(6)  | 0.0411(6)  | 0.0768(7)  | 0.0099(5)  | 0.0074(5)  | 0.0026(5)  |
| O3 | 0.0481(6)  | 0.0481(7)  | 0.0703(7)  | 0.0097(5)  | 0.0001(5)  | -0.0110(5) |
| C1 | 0.0362(7)  | 0.0358(7)  | 0.0435(7)  | 0.0031(6)  | 0.0068(6)  | -0.0013(6) |
| C2 | 0.0550(10) | 0.0418(9)  | 0.0597(9)  | 0.0129(7)  | 0.0060(7)  | -0.0024(7) |
| C3 | 0.0549(10) | 0.0447(10) | 0.0892(13) | 0.0182(9)  | -0.0015(9) | 0.0072(8)  |
| C4 | 0.0523(10) | 0.0509(10) | 0.0946(14) | -0.0055(9) | 0.0131(9)  | 0.0143(8)  |
| C5 | 0.0456(9)  | 0.0541(10) | 0.0581(9)  | -0.0058(7) | 0.0144(7)  | 0.0057(7)  |
| C6 | 0.0362(7)  | 0.0368(8)  | 0.0419(7)  | -0.0015(6) | 0.0045(6)  | -0.0008(6) |
| C7 | 0.0440(8)  | 0.0429(8)  | 0.0392(7)  | 0.0038(6)  | 0.0027(6)  | -0.0063(6) |

|     |            |            |            |             |             |            |
|-----|------------|------------|------------|-------------|-------------|------------|
| C8  | 0.0338(7)  | 0.0344(7)  | 0.0465(8)  | 0.0015(6)   | 0.0052(6)   | -0.0025(6) |
| C9  | 0.0434(8)  | 0.0398(8)  | 0.0385(7)  | 0.0009(6)   | 0.0073(6)   | -0.0035(6) |
| C10 | 0.0463(9)  | 0.0408(8)  | 0.0504(8)  | -0.0045(6)  | -0.0003(6)  | -0.0029(7) |
| C11 | 0.0368(8)  | 0.0428(8)  | 0.0698(10) | 0.0023(7)   | 0.0001(7)   | -0.0029(6) |
| C12 | 0.0405(8)  | 0.0426(8)  | 0.0613(9)  | -0.0002(7)  | 0.0147(7)   | -0.0020(6) |
| C13 | 0.0381(8)  | 0.0355(7)  | 0.0427(7)  | 0.0023(6)   | 0.0070(6)   | 0.0004(6)  |
| C14 | 0.0498(8)  | 0.0329(7)  | 0.0397(7)  | 0.0007(6)   | 0.0098(6)   | -0.0015(6) |
| C15 | 0.0527(9)  | 0.0395(8)  | 0.0456(8)  | 0.0032(6)   | 0.0079(7)   | -0.0038(7) |
| C16 | 0.0687(11) | 0.0410(9)  | 0.0653(10) | 0.0030(8)   | 0.0110(8)   | -0.0124(8) |
| C17 | 0.0797(12) | 0.0330(8)  | 0.0659(10) | 0.0076(7)   | 0.0180(9)   | 0.0018(8)  |
| C18 | 0.0655(10) | 0.0395(8)  | 0.0454(8)  | 0.0031(6)   | 0.0159(7)   | 0.0086(7)  |
| C19 | 0.0516(9)  | 0.0383(8)  | 0.0437(8)  | 0.0007(6)   | 0.0091(6)   | 0.0029(7)  |
| C20 | 0.0522(11) | 0.0715(13) | 0.0916(14) | 0.0136(11)  | 0.0018(9)   | -0.0200(9) |
| C21 | 0.0778(13) | 0.0504(10) | 0.0636(11) | 0.0114(8)   | 0.0134(9)   | 0.0207(9)  |
| C22 | 0.0344(7)  | 0.0391(8)  | 0.0464(8)  | -0.0034(6)  | 0.0073(6)   | -0.0007(6) |
| C23 | 0.0374(7)  | 0.0318(7)  | 0.0498(8)  | -0.0028(6)  | 0.0034(6)   | 0.0051(6)  |
| C24 | 0.0594(10) | 0.0393(8)  | 0.0505(9)  | -0.0009(7)  | 0.0064(7)   | 0.0017(7)  |
| C25 | 0.0917(14) | 0.0448(9)  | 0.0482(9)  | -0.0018(7)  | -0.0054(9)  | 0.0105(9)  |
| C26 | 0.0731(13) | 0.0485(10) | 0.0756(13) | -0.0118(9)  | -0.0305(10) | 0.0126(9)  |
| C27 | 0.0432(9)  | 0.0602(11) | 0.0901(14) | -0.0088(10) | -0.0115(9)  | 0.0017(8)  |
| C28 | 0.0382(8)  | 0.0497(9)  | 0.0667(10) | -0.0033(8)  | 0.0043(7)   | 0.0004(7)  |

Table S25. Hydrogen atomic coordinates and isotropic atomic displacement parameters ( $\text{\AA}^2$ ) for *syn,anti*-**22**.

|     | x/a      | y/b        | z/c        | U(eq)    |
|-----|----------|------------|------------|----------|
| H02 | 0.355(3) | 0.3287(12) | 0.3503(9)  | 0.056(5) |
| H01 | 1.145(3) | 0.6120(14) | 0.5150(12) | 0.084    |
| H2A | 0.7716   | 0.7916     | 0.3397     | 0.063    |
| H2B | 0.6757   | 0.7436     | 0.2749     | 0.063    |
| H3A | 0.4022   | 0.7493     | 0.3113     | 0.078    |
| H3B | 0.4812   | 0.8411     | 0.3118     | 0.078    |
| H4A | 0.5880   | 0.8313     | 0.4286     | 0.079    |
| H4B | 0.3778   | 0.8162     | 0.4133     | 0.079    |

|      |         |        |        |       |
|------|---------|--------|--------|-------|
| H5A  | 0.4188  | 0.6723 | 0.4211 | 0.062 |
| H5B  | 0.5195  | 0.7141 | 0.4882 | 0.062 |
| H7A  | 0.7821  | 0.5490 | 0.4764 | 0.051 |
| H7B  | 0.5702  | 0.5585 | 0.4657 | 0.051 |
| H8   | 0.7763  | 0.4983 | 0.3752 | 0.046 |
| H9A  | 0.6705  | 0.5757 | 0.2835 | 0.049 |
| H9B  | 0.4975  | 0.6053 | 0.3117 | 0.049 |
| H10A | 0.8534  | 0.7636 | 0.4725 | 0.056 |
| H10B | 0.8796  | 0.6832 | 0.5196 | 0.056 |
| H11  | 1.1085  | 0.7195 | 0.4420 | 0.061 |
| H12A | 0.9642  | 0.5980 | 0.3554 | 0.057 |
| H12B | 0.9848  | 0.6935 | 0.3367 | 0.057 |
| H16  | 0.2267  | 0.0631 | 0.3698 | 0.07  |
| H17  | 0.4893  | 0.0027 | 0.4261 | 0.071 |
| H19  | 0.7388  | 0.2244 | 0.4307 | 0.053 |
| H20A | 0.0218  | 0.1350 | 0.2893 | 0.11  |
| H20B | -0.0824 | 0.2181 | 0.3005 | 0.11  |
| H20C | -0.0190 | 0.1565 | 0.3614 | 0.11  |
| H21A | 0.7878  | 0.0120 | 0.4856 | 0.096 |
| H21B | 0.8397  | 0.1007 | 0.5181 | 0.096 |
| H21C | 0.9047  | 0.0747 | 0.4509 | 0.096 |
| H22A | 0.3287  | 0.5358 | 0.3754 | 0.048 |
| H22B | 0.2978  | 0.4460 | 0.4036 | 0.048 |
| H24  | 0.3643  | 0.4918 | 0.2355 | 0.06  |
| H25  | 0.1561  | 0.4622 | 0.1395 | 0.077 |
| H26  | -0.1218 | 0.4075 | 0.1482 | 0.085 |
| H27  | -0.1926 | 0.3831 | 0.2527 | 0.081 |
| H28  | 0.0147  | 0.4110 | 0.3488 | 0.063 |

Table S26. Hydrogen bond distances (Å) and angles (°) for *syn,anti*-**22**.

|             | Donor-H | Acceptor-H | Donor-Acceptor | Angle     |
|-------------|---------|------------|----------------|-----------|
| N2-H02...O3 | 0.84(2) | 2.150(19)  | 2.5754(16)     | 111.4(16) |

### 3.5 X-ray crystal structure of *anti,syn*-22

Compound *anti,syn*-22 was crystallized from EtOAc. Colorless crystals. Code DAN6939.

*X-ray crystal structure analysis of anti,syn-22 (dan6939):* A colorless needle-like specimen of  $C_{28}H_{36}N_2O_3$ , approximate dimensions 0.020 mm x 0.070 mm x 0.270 mm, was used for the X-ray crystallographic analysis. The X-ray intensity data were measured.

The integration of the data using a monoclinic unit cell yielded a total of 4164 reflections to a maximum  $\theta$  angle of  $66.92^\circ$  (0.84 Å resolution), of which 4164 were independent (average redundancy 1.000, completeness = 95.5%,  $R_{sig} = 3.04\%$ ) and 3332 (80.02%) were greater than  $2\sigma(F^2)$ .

The final cell constants of  $a = 7.9714(2)$  Å,  $b = 27.7657(10)$  Å,  $c = 11.1029(5)$  Å,  $\beta = 95.285(3)^\circ$ , volume =  $2446.97(15)$  Å<sup>3</sup>, are based upon the refinement of the XYZ-centroids of reflections above  $20 \sigma(I)$ . Data were corrected for absorption effects using the multi-scan method (SADABS). The calculated minimum and maximum transmission coefficients (based on crystal size) are 0.8500 and 0.9880.

The structure was solved and refined using the Bruker SHELXTL Software Package, using the space group  $P 1 21/n 1$ , with  $Z = 4$  for the formula unit,  $C_{28}H_{36}N_2O_3$ . The final anisotropic full-matrix least-squares refinement on  $F^2$  with 308 variables converged at  $R1 = 5.00\%$ , for the observed data and  $wR2 = 13.22\%$  for all data. The goodness-of-fit was 1.031. The largest peak in the final difference electron density synthesis was  $0.131 \text{ e}^-/\text{\AA}^3$  and the largest hole was  $-0.239 \text{ e}^-/\text{\AA}^3$  with an RMS deviation of  $0.044 \text{ e}^-/\text{\AA}^3$ . On the basis of the final model, the calculated density was  $1.218 \text{ g/cm}^3$  and  $F(000)$ , 968 e<sup>-</sup>. CCDC number: 2073469.

S40

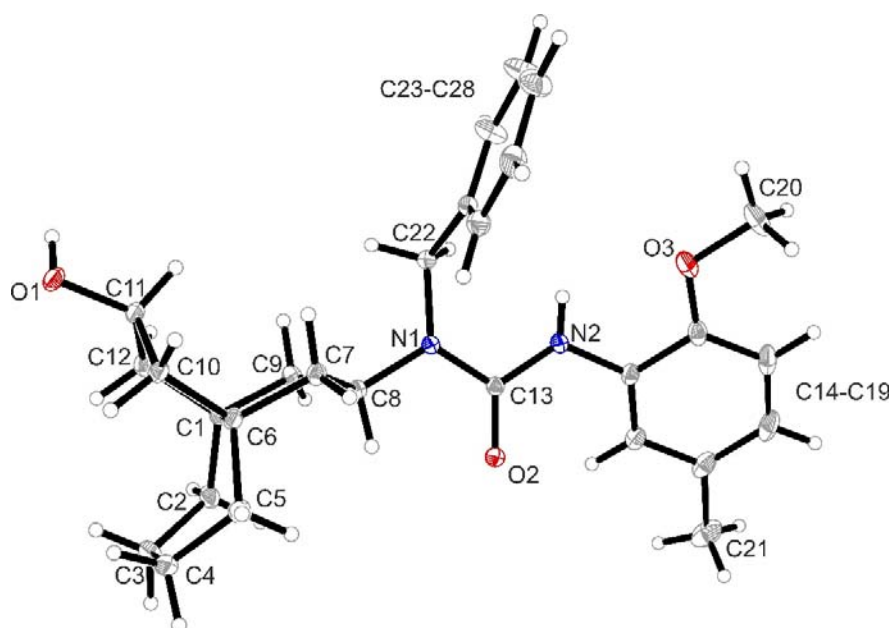

Table S27. Sample and crystal data for *anti,syn-22*.

|                        |                                                                                                                                                          |
|------------------------|----------------------------------------------------------------------------------------------------------------------------------------------------------|
| Identification code    | dan6939                                                                                                                                                  |
| Chemical formula       | $C_{28}H_{36}N_2O_3$                                                                                                                                     |
| Formula weight         | 448.59 g/mol                                                                                                                                             |
| Temperature            | 223(2) K                                                                                                                                                 |
| Wavelength             | 1.54178 Å                                                                                                                                                |
| Crystal size           | 0.020 x 0.070 x 0.270 mm                                                                                                                                 |
| Crystal habit          | colorless needle                                                                                                                                         |
| Crystal system         | monoclinic                                                                                                                                               |
| Space group            | $P 1 2_1/n 1$                                                                                                                                            |
| Unit cell dimensions   | $a = 7.9714(2) \text{ Å}$ $\alpha = 90^\circ$<br>$b = 27.7657(10) \text{ Å}$ $\beta = 95.285(3)^\circ$<br>$c = 11.1029(5) \text{ Å}$ $\gamma = 90^\circ$ |
| Volume                 | $2446.97(15) \text{ Å}^3$                                                                                                                                |
| Z                      | 4                                                                                                                                                        |
| Density (calculated)   | $1.218 \text{ g/cm}^3$                                                                                                                                   |
| Absorption coefficient | $0.621 \text{ mm}^{-1}$                                                                                                                                  |
| F(000)                 | 968                                                                                                                                                      |



Table S28. Data collection and structure refinement for *anti,syn-22*.

|                                 |                                                                                     |
|---------------------------------|-------------------------------------------------------------------------------------|
| Theta range for data collection | 5.11 to 66.92°                                                                      |
| Reflections collected           | 4164                                                                                |
| Absorption correction           | multi-scan                                                                          |
| Max. and min. transmission      | 0.9880 and 0.8500                                                                   |
| Structure solution technique    | direct methods                                                                      |
| Structure solution program      | SHELXL-2014/7 (Sheldrick, 2014)                                                     |
| Refinement method               | Full-matrix least-squares on $F^2$                                                  |
| Refinement program              | SHELXL-2014/7 (Sheldrick, 2014)                                                     |
| Function minimized              | $\sum w(F_o^2 - F_c^2)^2$                                                           |
| Data / restraints / parameters  | 4164 / 0 / 308                                                                      |
| Goodness-of-fit on $F^2$        | 1.031                                                                               |
| $\Delta/\sigma_{\max}$          | 0.001                                                                               |
| Final R indices                 | 3332 data; $I > 2\sigma(I)$ R1 = 0.0500, wR2 = 0.1217                               |
|                                 | all data R1 = 0.0649, wR2 = 0.1322                                                  |
| Weighting scheme                | $w = 1/[\sigma^2(F_o^2) + (0.0665P)^2 + 0.8438P]$<br>where $P = (F_o^2 + 2F_c^2)/3$ |
| Largest diff. peak and hole     | 0.131 and -0.239 eÅ <sup>-3</sup>                                                   |
| R.M.S. deviation from mean      | 0.044 eÅ <sup>-3</sup>                                                              |

Table S29. Atomic coordinates and equivalent isotropic atomic displacement parameters (Å<sup>2</sup>) for *anti,syn-22*.

U(eq) is defined as one third of the trace of the orthogonalized  $U_{ij}$  tensor.

|    | x/a         | y/b        | z/c         | U(eq)     |
|----|-------------|------------|-------------|-----------|
| N1 | 0.64333(17) | 0.66107(5) | 0.66179(13) | 0.0351(4) |
| N2 | 0.7004(2)   | 0.59301(6) | 0.55192(15) | 0.0391(4) |
| O1 | 0.62123(18) | 0.84538(5) | 0.00751(13) | 0.0483(4) |
| O2 | 0.45562(15) | 0.63401(5) | 0.50966(12) | 0.0412(3) |
| O3 | 0.83515(19) | 0.50887(5) | 0.60362(14) | 0.0561(4) |
| C1 | 0.4674(2)   | 0.78518(6) | 0.71854(16) | 0.0339(4) |
| C2 | 0.3310(3)   | 0.80252(8) | 0.62167(18) | 0.0479(5) |
| C3 | 0.1794(3)   | 0.82490(9) | 0.6739(2)   | 0.0601(6) |
| C4 | 0.1015(3)   | 0.79185(9) | 0.7639(2)   | 0.0589(6) |

## S42

|     |           |             |             |            |
|-----|-----------|-------------|-------------|------------|
| C5  | 0.2008(2) | 0.74532(7)  | 0.79040(19) | 0.0457(5)  |
| C6  | 0.3906(2) | 0.75337(6)  | 0.81909(15) | 0.0329(4)  |
| C7  | 0.4856(2) | 0.70494(6)  | 0.81633(16) | 0.0355(4)  |
| C8  | 0.5295(2) | 0.70093(6)  | 0.68618(16) | 0.0340(4)  |
| C9  | 0.5908(2) | 0.75160(7)  | 0.66067(16) | 0.0384(4)  |
| C10 | 0.4347(2) | 0.78070(7)  | 0.93773(16) | 0.0365(4)  |
| C11 | 0.5927(2) | 0.80894(6)  | 0.91786(16) | 0.0357(4)  |
| C12 | 0.5567(2) | 0.82729(7)  | 0.78911(17) | 0.0408(4)  |
| C13 | 0.5914(2) | 0.62970(6)  | 0.57119(15) | 0.0313(4)  |
| C14 | 0.6675(2) | 0.55576(6)  | 0.46606(17) | 0.0367(4)  |
| C15 | 0.7400(2) | 0.51084(7)  | 0.4950(2)   | 0.0459(5)  |
| C16 | 0.7147(3) | 0.47312(8)  | 0.4143(3)   | 0.0626(7)  |
| C17 | 0.6171(3) | 0.47980(9)  | 0.3065(2)   | 0.0670(7)  |
| C18 | 0.5456(3) | 0.52383(9)  | 0.2751(2)   | 0.0564(6)  |
| C19 | 0.5736(2) | 0.56185(8)  | 0.35612(17) | 0.0438(5)  |
| C20 | 0.9038(3) | 0.46313(9)  | 0.6420(3)   | 0.0718(7)  |
| C21 | 0.4362(3) | 0.53119(12) | 0.1584(2)   | 0.0833(9)  |
| C22 | 0.8179(2) | 0.66203(6)  | 0.71540(17) | 0.0368(4)  |
| C23 | 0.8698(2) | 0.62424(6)  | 0.80943(16) | 0.0384(4)  |
| C24 | 0.0389(3) | 0.61220(10) | 0.8255(2)   | 0.0675(7)  |
| C25 | 0.0983(4) | 0.58142(13) | 0.9173(3)   | 0.0949(10) |
| C26 | 0.9917(4) | 0.56260(10) | 0.9939(3)   | 0.0766(8)  |
| C27 | 0.8225(4) | 0.57336(8)  | 0.9783(2)   | 0.0644(6)  |
| C28 | 0.7620(3) | 0.60423(7)  | 0.8852(2)   | 0.0504(5)  |

Table S30. Bond lengths (Å) for *anti,syn*-**22**.

|        |          |        |          |
|--------|----------|--------|----------|
| N1-C13 | 1.366(2) | N1-C22 | 1.462(2) |
| N1-C8  | 1.472(2) | N2-C13 | 1.369(2) |
| N2-C14 | 1.414(2) | N2-H02 | 0.86(3)  |
| O1-C11 | 1.423(2) | O1-H01 | 0.87(3)  |
| O2-C13 | 1.231(2) | O3-C15 | 1.365(3) |
| O3-C20 | 1.432(2) | C1-C2  | 1.535(3) |

## S43

|          |          |          |          |
|----------|----------|----------|----------|
| C1-C9    | 1.538(2) | C1-C12   | 1.544(2) |
| C1-C6    | 1.590(2) | C2-C3    | 1.520(3) |
| C2-H2A   | 0.98     | C2-H2B   | 0.98     |
| C3-C4    | 1.530(4) | C3-H3A   | 0.98     |
| C3-H3B   | 0.98     | C4-C5    | 1.530(3) |
| C4-H4A   | 0.98     | C4-H4B   | 0.98     |
| C5-C6    | 1.534(2) | C5-H5A   | 0.98     |
| C5-H5B   | 0.98     | C6-C10   | 1.533(2) |
| C6-C7    | 1.545(2) | C7-C8    | 1.522(2) |
| C7-H7A   | 0.98     | C7-H7B   | 0.98     |
| C8-C9    | 1.524(3) | C8-H8    | 0.99     |
| C9-H9A   | 0.98     | C9-H9B   | 0.98     |
| C10-C11  | 1.517(2) | C10-H10A | 0.98     |
| C10-H10B | 0.98     | C11-C12  | 1.520(3) |
| C11-H11  | 0.99     | C12-H12A | 0.98     |
| C12-H12B | 0.98     | C14-C19  | 1.382(3) |
| C14-C15  | 1.400(3) | C15-C16  | 1.381(3) |
| C16-C17  | 1.379(4) | C16-H16  | 0.94     |
| C17-C18  | 1.380(4) | C17-H17  | 0.94     |
| C18-C19  | 1.392(3) | C18-C21  | 1.508(4) |
| C19-H19  | 0.94     | C20-H20A | 0.97     |
| C20-H20B | 0.97     | C20-H20C | 0.97     |
| C21-H21A | 0.97     | C21-H21B | 0.97     |
| C21-H21C | 0.97     | C22-C23  | 1.511(2) |
| C22-H22A | 0.98     | C22-H22B | 0.98     |
| C23-C28  | 1.374(3) | C23-C24  | 1.384(3) |
| C24-C25  | 1.380(3) | C24-H24  | 0.94     |
| C25-C26  | 1.361(4) | C25-H25  | 0.94     |
| C26-C27  | 1.377(4) | C26-H26  | 0.94     |
| C27-C28  | 1.394(3) | C27-H27  | 0.94     |
| C28-H28  | 0.94     |          |          |

Table S31. Bond angles (°) for *anti,syn*-**22**.

|            |            |            |            |
|------------|------------|------------|------------|
| C13-N1-C22 | 121.59(14) | C13-N1-C8  | 117.70(13) |
| C22-N1-C8  | 119.40(14) | C13-N2-C14 | 124.67(15) |
| C13-N2-H02 | 116.8(17)  | C14-N2-H02 | 114.7(17)  |
| C11-O1-H01 | 105.9(17)  | C15-O3-C20 | 117.67(19) |
| C2-C1-C9   | 109.67(15) | C2-C1-C12  | 112.43(15) |
| C9-C1-C12  | 112.86(15) | C2-C1-C6   | 111.87(15) |
| C9-C1-C6   | 105.02(14) | C12-C1-C6  | 104.69(14) |
| C3-C2-C1   | 113.44(17) | C3-C2-H2A  | 108.9      |
| C1-C2-H2A  | 108.9      | C3-C2-H2B  | 108.9      |
| C1-C2-H2B  | 108.9      | H2A-C2-H2B | 107.7      |
| C2-C3-C4   | 112.87(18) | C2-C3-H3A  | 109.0      |
| C4-C3-H3A  | 109.0      | C2-C3-H3B  | 109.0      |
| C4-C3-H3B  | 109.0      | H3A-C3-H3B | 107.8      |
| C5-C4-C3   | 113.45(18) | C5-C4-H4A  | 108.9      |
| C3-C4-H4A  | 108.9      | C5-C4-H4B  | 108.9      |
| C3-C4-H4B  | 108.9      | H4A-C4-H4B | 107.7      |
| C4-C5-C6   | 113.59(16) | C4-C5-H5A  | 108.8      |
| C6-C5-H5A  | 108.8      | C4-C5-H5B  | 108.8      |
| C6-C5-H5B  | 108.8      | H5A-C5-H5B | 107.7      |
| C10-C6-C5  | 113.22(14) | C10-C6-C7  | 111.96(14) |
| C5-C6-C7   | 110.19(14) | C10-C6-C1  | 104.83(14) |
| C5-C6-C1   | 111.81(15) | C7-C6-C1   | 104.39(13) |
| C8-C7-C6   | 103.79(14) | C8-C7-H7A  | 111.0      |
| C6-C7-H7A  | 111.0      | C8-C7-H7B  | 111.0      |
| C6-C7-H7B  | 111.0      | H7A-C7-H7B | 109.0      |
| N1-C8-C7   | 115.40(15) | N1-C8-C9   | 116.49(15) |
| C7-C8-C9   | 102.40(14) | N1-C8-H8   | 107.3      |
| C7-C8-H8   | 107.3      | C9-C8-H8   | 107.3      |
| C8-C9-C1   | 104.67(14) | C8-C9-H9A  | 110.8      |
| C1-C9-H9A  | 110.8      | C8-C9-H9B  | 110.8      |
| C1-C9-H9B  | 110.8      | H9A-C9-H9B | 108.9      |

## S45

|               |            |               |            |
|---------------|------------|---------------|------------|
| C11-C10-C6    | 104.98(14) | C11-C10-H10A  | 110.8      |
| C6-C10-H10A   | 110.8      | C11-C10-H10B  | 110.8      |
| C6-C10-H10B   | 110.8      | H10A-C10-H10B | 108.8      |
| O1-C11-C10    | 110.33(14) | O1-C11-C12    | 115.08(15) |
| C10-C11-C12   | 102.87(14) | O1-C11-H11    | 109.4      |
| C10-C11-H11   | 109.4      | C12-C11-H11   | 109.4      |
| C11-C12-C1    | 105.17(14) | C11-C12-H12A  | 110.7      |
| C1-C12-H12A   | 110.7      | C11-C12-H12B  | 110.7      |
| C1-C12-H12B   | 110.7      | H12A-C12-H12B | 108.8      |
| O2-C13-N1     | 122.55(15) | O2-C13-N2     | 121.58(16) |
| N1-C13-N2     | 115.87(15) | C19-C14-C15   | 119.37(18) |
| C19-C14-N2    | 123.88(17) | C15-C14-N2    | 116.72(17) |
| O3-C15-C16    | 125.4(2)   | O3-C15-C14    | 115.01(17) |
| C16-C15-C14   | 119.6(2)   | C17-C16-C15   | 119.9(2)   |
| C17-C16-H16   | 120.0      | C15-C16-H16   | 120.0      |
| C16-C17-C18   | 121.7(2)   | C16-C17-H17   | 119.2      |
| C18-C17-H17   | 119.2      | C17-C18-C19   | 118.1(2)   |
| C17-C18-C21   | 122.0(2)   | C19-C18-C21   | 119.9(2)   |
| C14-C19-C18   | 121.3(2)   | C14-C19-H19   | 119.3      |
| C18-C19-H19   | 119.3      | O3-C20-H20A   | 109.5      |
| O3-C20-H20B   | 109.5      | H20A-C20-H20B | 109.5      |
| O3-C20-H20C   | 109.5      | H20A-C20-H20C | 109.5      |
| H20B-C20-H20C | 109.5      | C18-C21-H21A  | 109.5      |
| C18-C21-H21B  | 109.5      | H21A-C21-H21B | 109.5      |
| C18-C21-H21C  | 109.5      | H21A-C21-H21C | 109.5      |
| H21B-C21-H21C | 109.5      | N1-C22-C23    | 117.28(15) |
| N1-C22-H22A   | 108.0      | C23-C22-H22A  | 108.0      |
| N1-C22-H22B   | 108.0      | C23-C22-H22B  | 108.0      |
| H22A-C22-H22B | 107.2      | C28-C23-C24   | 118.67(19) |
| C28-C23-C22   | 123.86(17) | C24-C23-C22   | 117.28(18) |
| C25-C24-C23   | 120.6(2)   | C25-C24-H24   | 119.7      |
| C23-C24-H24   | 119.7      | C26-C25-C24   | 120.5(3)   |

|             |          |             |          |
|-------------|----------|-------------|----------|
| C26-C25-H25 | 119.7    | C24-C25-H25 | 119.7    |
| C25-C26-C27 | 119.9(2) | C25-C26-H26 | 120.0    |
| C27-C26-H26 | 120.0    | C26-C27-C28 | 119.7(2) |
| C26-C27-H27 | 120.2    | C28-C27-H27 | 120.2    |
| C23-C28-C27 | 120.6(2) | C23-C28-H28 | 119.7    |
| C27-C28-H28 | 119.7    |             |          |

Table S32. Torsion angles (°) for *anti,syn-22*.

|                |             |               |             |
|----------------|-------------|---------------|-------------|
| C9-C1-C2-C3    | 164.99(18)  | C12-C1-C2-C3  | -68.6(2)    |
| C6-C1-C2-C3    | 48.9(2)     | C1-C2-C3-C4   | -54.0(3)    |
| C2-C3-C4-C5    | 4.9(3)      | C3-C4-C5-C6   | 48.0(2)     |
| C4-C5-C6-C10   | 66.4(2)     | C4-C5-C6-C7   | -167.34(17) |
| C4-C5-C6-C1    | -51.7(2)    | C2-C1-C6-C10  | -119.60(16) |
| C9-C1-C6-C10   | 121.51(15)  | C12-C1-C6-C10 | 2.43(17)    |
| C2-C1-C6-C5    | 3.4(2)      | C9-C1-C6-C5   | -115.45(16) |
| C12-C1-C6-C5   | 125.46(15)  | C2-C1-C6-C7   | 122.54(15)  |
| C9-C1-C6-C7    | 3.65(17)    | C12-C1-C6-C7  | -115.43(15) |
| C10-C6-C7-C8   | -141.88(15) | C5-C6-C7-C8   | 91.16(17)   |
| C1-C6-C7-C8    | -29.03(17)  | C13-N1-C8-C7  | 125.64(17)  |
| C22-N1-C8-C7   | -67.2(2)    | C13-N1-C8-C9  | -114.20(18) |
| C22-N1-C8-C9   | 53.0(2)     | C6-C7-C8-N1   | 171.40(13)  |
| C6-C7-C8-C9    | 43.81(17)   | N1-C8-C9-C1   | -168.45(14) |
| C7-C8-C9-C1    | -41.56(17)  | C2-C1-C9-C8   | -97.29(18)  |
| C12-C1-C9-C8   | 136.52(15)  | C6-C1-C9-C8   | 23.06(17)   |
| C5-C6-C10-C11  | -148.83(16) | C7-C6-C10-C11 | 85.86(17)   |
| C1-C6-C10-C11  | -26.71(18)  | C6-C10-C11-O1 | 164.46(14)  |
| C6-C10-C11-C12 | 41.21(18)   | O1-C11-C12-C1 | -159.54(15) |
| C10-C11-C12-C1 | -39.52(18)  | C2-C1-C12-C11 | 144.31(16)  |
| C9-C1-C12-C11  | -91.00(18)  | C6-C1-C12-C11 | 22.66(18)   |
| C22-N1-C13-O2  | -166.10(17) | C8-N1-C13-O2  | 0.8(3)      |
| C22-N1-C13-N2  | 13.5(2)     | C8-N1-C13-N2  | -179.62(15) |
| C14-N2-C13-O2  | -3.1(3)     | C14-N2-C13-N1 | 177.32(16)  |

|                 |            |                 |             |
|-----------------|------------|-----------------|-------------|
| C13-N2-C14-C19  | 33.4(3)    | C13-N2-C14-C15  | -148.50(18) |
| C20-O3-C15-C16  | -5.3(3)    | C20-O3-C15-C14  | 176.04(18)  |
| C19-C14-C15-O3  | 177.82(16) | N2-C14-C15-O3   | -0.4(2)     |
| C19-C14-C15-C16 | -1.0(3)    | N2-C14-C15-C16  | -179.13(17) |
| O3-C15-C16-C17  | -179.2(2)  | C14-C15-C16-C17 | -0.6(3)     |
| C15-C16-C17-C18 | 1.3(4)     | C16-C17-C18-C19 | -0.4(3)     |
| C16-C17-C18-C21 | -178.8(2)  | C15-C14-C19-C18 | 1.9(3)      |
| N2-C14-C19-C18  | 179.90(17) | C17-C18-C19-C14 | -1.2(3)     |
| C21-C18-C19-C14 | 177.3(2)   | C13-N1-C22-C23  | -80.2(2)    |
| C8-N1-C22-C23   | 113.15(18) | N1-C22-C23-C28  | -30.1(3)    |
| N1-C22-C23-C24  | 155.15(19) | C28-C23-C24-C25 | -1.2(4)     |
| C22-C23-C24-C25 | 173.9(3)   | C23-C24-C25-C26 | -0.4(5)     |
| C24-C25-C26-C27 | 1.6(5)     | C25-C26-C27-C28 | -1.2(4)     |
| C24-C23-C28-C27 | 1.5(3)     | C22-C23-C28-C27 | -173.15(19) |
| C26-C27-C28-C23 | -0.4(4)    |                 |             |

Table S33. Anisotropic atomic displacement parameters ( $\text{\AA}^2$ ) for *anti,syn-22*.

The anisotropic atomic displacement factor exponent takes the form:  $-2\pi^2 [h^2 a^{*2} U_{11} + \dots + 2 h k a^* b^* U_{12}]$

|    | $U_{11}$   | $U_{22}$   | $U_{33}$   | $U_{23}$    | $U_{13}$    | $U_{12}$   |
|----|------------|------------|------------|-------------|-------------|------------|
| N1 | 0.0324(8)  | 0.0334(8)  | 0.0386(8)  | -0.0075(7)  | -0.0022(6)  | 0.0060(6)  |
| N2 | 0.0376(8)  | 0.0355(9)  | 0.0433(9)  | -0.0092(7)  | -0.0007(7)  | 0.0077(7)  |
| O1 | 0.0386(8)  | 0.0521(9)  | 0.0538(8)  | -0.0221(7)  | 0.0026(6)   | -0.0095(6) |
| O2 | 0.0350(7)  | 0.0416(7)  | 0.0456(7)  | -0.0102(6)  | -0.0035(6)  | 0.0054(6)  |
| O3 | 0.0579(9)  | 0.0398(8)  | 0.0714(10) | 0.0065(7)   | 0.0101(8)   | 0.0136(7)  |
| C1 | 0.0364(9)  | 0.0315(9)  | 0.0338(9)  | -0.0018(7)  | 0.0036(7)   | 0.0035(7)  |
| C2 | 0.0561(12) | 0.0455(11) | 0.0406(11) | -0.0029(9)  | -0.0042(9)  | 0.0149(9)  |
| C3 | 0.0503(12) | 0.0582(14) | 0.0690(15) | -0.0120(12) | -0.0093(11) | 0.0198(11) |
| C4 | 0.0332(11) | 0.0703(15) | 0.0718(15) | -0.0275(13) | -0.0023(10) | 0.0082(10) |
| C5 | 0.0345(10) | 0.0508(12) | 0.0522(12) | -0.0188(10) | 0.0065(8)   | -0.0065(8) |
| C6 | 0.0308(9)  | 0.0337(9)  | 0.0344(9)  | -0.0073(8)  | 0.0044(7)   | -0.0027(7) |
| C7 | 0.0375(10) | 0.0312(9)  | 0.0385(10) | -0.0012(8)  | 0.0063(7)   | -0.0038(7) |
| C8 | 0.0324(9)  | 0.0326(9)  | 0.0366(9)  | -0.0065(8)  | 0.0019(7)   | 0.0045(7)  |

|     |            |            |            |             |             |             |
|-----|------------|------------|------------|-------------|-------------|-------------|
| C9  | 0.0433(10) | 0.0363(10) | 0.0367(9)  | 0.0030(8)   | 0.0102(8)   | 0.0062(8)   |
| C10 | 0.0348(9)  | 0.0403(10) | 0.0347(10) | -0.0073(8)  | 0.0052(7)   | -0.0043(8)  |
| C11 | 0.0324(9)  | 0.0354(10) | 0.0394(10) | -0.0098(8)  | 0.0027(7)   | -0.0029(7)  |
| C12 | 0.0433(10) | 0.0326(10) | 0.0468(11) | -0.0024(8)  | 0.0066(8)   | -0.0019(8)  |
| C13 | 0.0308(9)  | 0.0310(9)  | 0.0326(9)  | -0.0018(7)  | 0.0054(7)   | 0.0005(7)   |
| C14 | 0.0348(9)  | 0.0323(9)  | 0.0451(10) | -0.0075(8)  | 0.0142(8)   | -0.0035(7)  |
| C15 | 0.0441(11) | 0.0349(11) | 0.0617(13) | -0.0035(10) | 0.0204(9)   | -0.0008(8)  |
| C16 | 0.0680(15) | 0.0328(11) | 0.0920(19) | -0.0138(12) | 0.0350(14)  | -0.0057(10) |
| C17 | 0.0702(16) | 0.0558(15) | 0.0798(18) | -0.0347(14) | 0.0333(14)  | -0.0200(12) |
| C18 | 0.0523(12) | 0.0660(15) | 0.0541(13) | -0.0251(12) | 0.0219(10)  | -0.0180(11) |
| C19 | 0.0423(10) | 0.0471(11) | 0.0437(11) | -0.0088(9)  | 0.0131(8)   | -0.0055(9)  |
| C20 | 0.0666(15) | 0.0510(14) | 0.102(2)   | 0.0288(14)  | 0.0315(14)  | 0.0230(12)  |
| C21 | 0.0748(17) | 0.122(3)   | 0.0538(14) | -0.0379(16) | 0.0118(12)  | -0.0230(17) |
| C22 | 0.0326(9)  | 0.0336(9)  | 0.0430(10) | -0.0019(8)  | -0.0031(8)  | 0.0012(7)   |
| C23 | 0.0427(10) | 0.0331(10) | 0.0383(10) | -0.0035(8)  | -0.0013(8)  | 0.0020(8)   |
| C24 | 0.0497(13) | 0.0832(18) | 0.0697(16) | 0.0247(14)  | 0.0049(11)  | 0.0199(12)  |
| C25 | 0.0675(18) | 0.123(3)   | 0.093(2)   | 0.045(2)    | -0.0013(16) | 0.0352(18)  |
| C26 | 0.088(2)   | 0.0741(18) | 0.0651(16) | 0.0210(14)  | -0.0098(14) | 0.0174(15)  |
| C27 | 0.0902(19) | 0.0458(13) | 0.0574(14) | 0.0091(11)  | 0.0082(12)  | -0.0084(12) |
| C28 | 0.0521(12) | 0.0397(11) | 0.0590(13) | 0.0040(10)  | 0.0026(10)  | -0.0032(9)  |

Table S34. Hydrogen atomic coordinates and isotropic atomic displacement parameters ( $\text{\AA}^2$ ) for *anti,syn*-**22**.

|     | x/a      | y/b       | z/c      | U(eq)    |
|-----|----------|-----------|----------|----------|
| H02 | 0.774(3) | 0.5860(9) | 0.610(2) | 0.070(8) |
| H01 | 0.727(4) | 0.8536(9) | 1.007(2) | 0.074(8) |
| H2A | 0.3804   | 0.8263    | 0.5701   | 0.058    |
| H2B | 0.2929   | 0.7751    | 0.5706   | 0.058    |
| H3A | 0.0938   | 0.8326    | 0.6076   | 0.072    |
| H3B | 0.2140   | 0.8551    | 0.7146   | 0.072    |
| H4A | 0.0944   | 0.8094    | 0.8399   | 0.071    |
| H4B | -0.0135  | 0.7836    | 0.7317   | 0.071    |



|      |        |        |        |       |
|------|--------|--------|--------|-------|
| H5A  | 0.1828 | 0.7239 | 0.7202 | 0.055 |
| H5B  | 0.1567 | 0.7290 | 0.8592 | 0.055 |
| H7A  | 0.5877 | 0.7053 | 0.8728 | 0.043 |
| H7B  | 0.4138 | 0.6781 | 0.8371 | 0.043 |
| H8   | 0.4228 | 0.6958 | 0.6347 | 0.041 |
| H9A  | 0.5878 | 0.7574 | 0.5734 | 0.046 |
| H9B  | 0.7062 | 0.7565 | 0.6972 | 0.046 |
| H10A | 0.3429 | 0.8024 | 0.9547 | 0.044 |
| H10B | 0.4558 | 0.7582 | 1.0055 | 0.044 |
| H11  | 0.6905 | 0.7868 | 0.9221 | 0.043 |
| H12A | 0.6616 | 0.8358 | 0.7547 | 0.049 |
| H12B | 0.4837 | 0.8557 | 0.7869 | 0.049 |
| H16  | 0.7638 | 0.4429 | 0.4329 | 0.075 |
| H17  | 0.5988 | 0.4537 | 0.2530 | 0.08  |
| H19  | 0.5277 | 0.5923 | 0.3357 | 0.053 |
| H20A | 0.8127 | 0.4410 | 0.6546 | 0.108 |
| H20B | 0.9749 | 0.4670 | 0.7171 | 0.108 |
| H20C | 0.9702 | 0.4503 | 0.5804 | 0.108 |
| H21A | 0.3254 | 0.5177 | 0.1659 | 0.125 |
| H21B | 0.4869 | 0.5153 | 0.0930 | 0.125 |
| H21C | 0.4258 | 0.5654 | 0.1413 | 0.125 |
| H22A | 0.8392 | 0.6937 | 0.7524 | 0.044 |
| H22B | 0.8915 | 0.6590 | 0.6498 | 0.044 |
| H24  | 1.1139 | 0.6251 | 0.7735 | 0.081 |
| H25  | 1.2133 | 0.5734 | 0.9269 | 0.114 |
| H26  | 1.0336 | 0.5423 | 1.0574 | 0.092 |
| H27  | 0.7482 | 0.5600 | 1.0301 | 0.077 |
| H28  | 0.6464 | 0.6114 | 0.8742 | 0.061 |

Table S35. Hydrogen bond distances (Å) and angles (°) for *anti,syn*-**22**.

|             | Donor-H | Acceptor-H | Donor-Acceptor | Angle   |
|-------------|---------|------------|----------------|---------|
| O1-H01...O2 | 0.87(3) | 1.85(3)    | 2.7243(19)     | 175.(2) |

### 3.6 X-ray crystal structure of *syn-25*

Compound *syn-25* was crystallized from EtOAc. Colorless crystals. Code DAN7353

*X-ray crystal structure analysis of syn-25 (dan7353)*: A colorless prism-like specimen of  $C_{19}H_{22}F_2N_2O_2$ , approximate dimensions 0.100 mm x 0.140 mm x 0.180 mm, was used for the X-ray crystallographic analysis. The X-ray intensity data were measured.

The integration of the data using a triclinic unit cell yielded a total of 9040 reflections to a maximum  $\theta$  angle of  $67.31^\circ$  (0.84 Å resolution), of which 9040 were independent (average redundancy 1.000, completeness = 96.6%,  $R_{sig} = 2.87\%$ ) and 7415 (82.02%) were greater than  $2\sigma(F^2)$ .

The final cell constants of  $a = 12.9305(5)$  Å,  $b = 13.0504(5)$  Å,  $c = 17.0932(4)$  Å,  $\alpha = 112.037(2)^\circ$ ,  $\beta = 97.638(2)^\circ$ ,  $\gamma = 97.0010(10)^\circ$ , volume =  $2603.27(16)$  Å<sup>3</sup>, are based upon the refinement of the XYZ-centroids of reflections above  $20 \sigma(I)$ . Data were corrected for absorption effects using the multi-scan method (SADABS). The calculated minimum and maximum transmission coefficients (based on crystal size) are 0.8630 and 0.9200.

The structure was solved and refined using the Bruker SHELXTL Software Package, using the space group  $P -1$ , with  $Z = 6$  for the formula unit,  $C_{19}H_{22}F_2N_2O_2$ . The final anisotropic full-matrix least-squares refinement on  $F^2$  with 928 variables converged at  $R1 = 6.16\%$ , for the observed data and  $wR2 = 18.77\%$  for all data. The goodness-of-fit was 1.038. The largest peak in the final difference electron density synthesis was  $1.261 e^-/\text{\AA}^3$  and the largest hole was  $-0.361 e^-/\text{\AA}^3$  with an RMS deviation of  $0.044 e^-/\text{\AA}^3$ . On the basis of the final model, the calculated density was  $1.333 \text{ g/cm}^3$  and  $F(000)$ , 1104  $e^-$ . CCDC number: 2073470.

S51

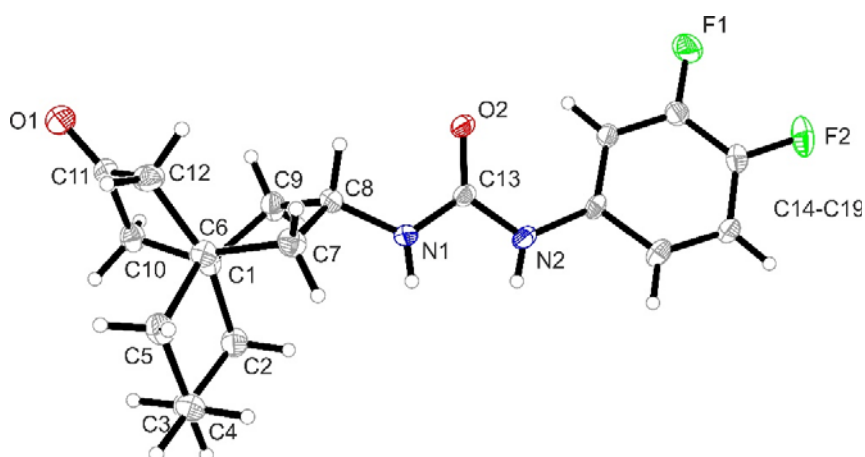

Table S36. Sample and crystal data for *syn*-**25**.

|                        |                              |                              |
|------------------------|------------------------------|------------------------------|
| Identification code    | dan7353                      |                              |
| Chemical formula       | $C_{19}H_{22}F_2N_2O_2$      |                              |
| Formula weight         | 348.38 g/mol                 |                              |
| Temperature            | 223(2) K                     |                              |
| Wavelength             | 1.54178 Å                    |                              |
| Crystal size           | 0.100 x 0.140 x 0.180 mm     |                              |
| Crystal habit          | colorless prism              |                              |
| Crystal system         | Triclinic                    |                              |
| Space group            | P -1                         |                              |
| Unit cell dimensions   | $a = 12.9305(5)$ Å           | $\alpha = 112.037(2)^\circ$  |
|                        | $b = 13.0504(5)$ Å           | $\beta = 97.638(2)^\circ$    |
|                        | $c = 17.0932(4)$ Å           | $\gamma = 97.0010(10)^\circ$ |
| Volume                 | $2603.27(16)$ Å <sup>3</sup> |                              |
| Z                      | 6                            |                              |
| Density (calculated)   | 1.333 g/cm <sup>3</sup>      |                              |
| Absorption coefficient | 0.846 mm <sup>-1</sup>       |                              |
| F(000)                 | 1104                         |                              |

Table S37. Data collection and structure refinement for *syn-25*.

|                                 |                                                                                             |
|---------------------------------|---------------------------------------------------------------------------------------------|
| Theta range for data collection | 3.51 to 67.31°                                                                              |
| Reflections collected           | 9040                                                                                        |
| Absorption correction           | multi-scan                                                                                  |
| Max. and min. transmission      | 0.9200 and 0.8630                                                                           |
| Structure solution technique    | direct methods                                                                              |
| Structure solution program      | SHELXL-2014/7 (Sheldrick, 2014)                                                             |
| Refinement method               | Full-matrix least-squares on $F^2$                                                          |
| Refinement program              | SHELXL-2014/7 (Sheldrick, 2014)                                                             |
| Function minimized              | $\sum w(F_o^2 - F_c^2)^2$                                                                   |
| Data / restraints / parameters  | 9040 / 622 / 928                                                                            |
| Goodness-of-fit on $F^2$        | 1.038                                                                                       |
| Final R indices                 | 7415 data; $I > 2\sigma(I)$ R1 = 0.0616, wR2 = 0.1764<br>all data R1 = 0.0716, wR2 = 0.1877 |
| Weighting scheme                | $w = 1/[\sigma^2(F_o^2) + (0.1064P)^2 + 1.0647P]$<br>where $P = (F_o^2 + 2F_c^2)/3$         |
| Largest diff. peak and hole     | 1.261 and -0.361 eÅ <sup>-3</sup>                                                           |
| R.M.S. deviation from mean      | 0.044 eÅ <sup>-3</sup>                                                                      |

Table S38. Atomic coordinates and equivalent isotropic atomic displacement parameters (Å<sup>2</sup>) for *syn-25*.

U(eq) is defined as one third of the trace of the orthogonalized  $U_{ij}$  tensor.

|     | x/a         | y/b         | z/c         | U(eq)     |
|-----|-------------|-------------|-------------|-----------|
| N1A | 0.24735(17) | 0.81739(19) | 0.70007(17) | 0.0655(6) |
| O1A | 0.50201(17) | 0.4253(2)   | 0.58788(19) | 0.0997(8) |
| O2A | 0.37988(12) | 0.96407(14) | 0.72681(11) | 0.0594(4) |
| C1A | 0.29377(19) | 0.5524(2)   | 0.67530(15) | 0.0535(5) |
| C2A | 0.2051(3)   | 0.5529(3)   | 0.72632(19) | 0.0737(8) |
| C3A | 0.1231(3)   | 0.4481(3)   | 0.6858(2)   | 0.0872(9) |
| C4A | 0.0757(2)   | 0.4317(3)   | 0.5982(2)   | 0.0833(9) |
| C5A | 0.1561(2)   | 0.4240(2)   | 0.54147(18) | 0.0727(7) |
| C6A | 0.25134(19) | 0.5241(2)   | 0.57924(15) | 0.0553(6) |
| C7A | 0.2225(2)   | 0.6326(2)   | 0.57731(18) | 0.0688(7) |

## S53

|      |             |             |             |           |
|------|-------------|-------------|-------------|-----------|
| C8A  | 0.3013(2)   | 0.7290(2)   | 0.6518(2)   | 0.0656(7) |
| C9A  | 0.3564(2)   | 0.6739(2)   | 0.7061(2)   | 0.0715(7) |
| C10A | 0.3677(2)   | 0.4710(2)   | 0.67659(18) | 0.0681(7) |
| C11A | 0.4194(2)   | 0.4562(2)   | 0.5996(2)   | 0.0714(8) |
| C12A | 0.3469(2)   | 0.4879(3)   | 0.5367(2)   | 0.0775(8) |
| C13A | 0.29118(17) | 0.9277(2)   | 0.73501(15) | 0.0510(5) |
| N2A  | 0.22957(17) | 0.9963(2)   | 0.78036(13) | 0.0574(5) |
| C14A | 0.2516(9)   | 0.1181(7)   | 0.8099(12)  | 0.050(2)  |
| C15A | 0.3486(8)   | 0.1846(6)   | 0.8209(8)   | 0.054(2)  |
| C16A | 0.3573(9)   | 0.2991(6)   | 0.8453(7)   | 0.067(2)  |
| F1A  | 0.4513(8)   | 0.3646(7)   | 0.8587(8)   | 0.112(3)  |
| C17A | 0.2712(10)  | 0.3512(7)   | 0.8589(5)   | 0.064(2)  |
| F2A  | 0.2816(10)  | 0.4633(6)   | 0.8848(6)   | 0.110(3)  |
| C18A | 0.1737(9)   | 0.2889(8)   | 0.8514(5)   | 0.060(2)  |
| C19A | 0.1650(8)   | 0.1738(8)   | 0.8251(7)   | 0.065(2)  |
| C14D | 0.2274(11)  | 0.1062(9)   | 0.8042(15)  | 0.057(3)  |
| C15D | 0.3166(11)  | 0.1775(9)   | 0.8081(10)  | 0.065(3)  |
| C16D | 0.3129(10)  | 0.2898(8)   | 0.8351(8)   | 0.073(3)  |
| F1D  | 0.3998(12)  | 0.3617(9)   | 0.8375(8)   | 0.114(3)  |
| C17D | 0.2218(11)  | 0.3272(8)   | 0.8557(6)   | 0.057(2)  |
| F2D  | 0.2215(12)  | 0.4399(8)   | 0.8809(7)   | 0.113(3)  |
| C18D | 0.1338(10)  | 0.2558(9)   | 0.8539(6)   | 0.066(2)  |
| C19D | 0.1373(9)   | 0.1439(9)   | 0.8288(8)   | 0.062(2)  |
| O2B  | 0.97814(12) | 0.23661(15) | 0.31562(12) | 0.0606(4) |
| N1B  | 0.15035(15) | 0.27479(17) | 0.30640(13) | 0.0524(5) |
| N2B  | 0.09597(15) | 0.13411(19) | 0.34829(14) | 0.0564(5) |
| F1B  | 0.79182(15) | 0.0270(2)   | 0.45118(16) | 0.1036(7) |
| F2B  | 0.84065(13) | 0.82451(15) | 0.42165(12) | 0.0830(5) |
| C2B  | 0.2020(2)   | 0.2915(3)   | 0.09317(18) | 0.0722(7) |
| C3B  | 0.3022(3)   | 0.3291(3)   | 0.0663(2)   | 0.0875(9) |
| C4B  | 0.3837(2)   | 0.4081(3)   | 0.1438(2)   | 0.0753(8) |
| C5B  | 0.3413(2)   | 0.5099(3)   | 0.1946(2)   | 0.0699(7) |

## S54

|      |             |             |             |            |
|------|-------------|-------------|-------------|------------|
| C7B  | 0.25039(19) | 0.4368(2)   | 0.29278(16) | 0.0597(6)  |
| C8B  | 0.13954(18) | 0.3728(2)   | 0.28727(16) | 0.0548(6)  |
| C9B  | 0.07662(19) | 0.3462(2)   | 0.19647(18) | 0.0620(6)  |
| C1B  | 0.15272(19) | 0.3883(2)   | 0.14805(17) | 0.0614(6)  |
| C6B  | 0.23660(19) | 0.4820(2)   | 0.22235(18) | 0.0600(6)  |
| C10B | 0.0969(7)   | 0.4675(9)   | 0.1122(7)   | 0.064(2)   |
| C11B | 0.1139(7)   | 0.5835(8)   | 0.1822(8)   | 0.064(2)   |
| O1B  | 0.0718(7)   | 0.6591(9)   | 0.1758(8)   | 0.104(3)   |
| C12B | 0.1851(8)   | 0.5868(7)   | 0.2604(7)   | 0.066(2)   |
| C10E | 0.1047(7)   | 0.4318(10)  | 0.0825(7)   | 0.059(2)   |
| C11E | 0.1037(7)   | 0.5495(10)  | 0.1435(9)   | 0.067(2)   |
| O1E  | 0.0565(8)   | 0.6174(11)  | 0.1289(11)  | 0.119(3)   |
| C12E | 0.1779(9)   | 0.5804(8)   | 0.2280(8)   | 0.068(3)   |
| C13B | 0.06876(17) | 0.2160(2)   | 0.32318(14) | 0.0493(5)  |
| C14B | 0.02964(17) | 0.0579(2)   | 0.36766(14) | 0.0501(5)  |
| C15B | 0.93957(18) | 0.0839(2)   | 0.40226(15) | 0.0545(5)  |
| C16B | 0.87834(18) | 0.0038(2)   | 0.41884(16) | 0.0581(6)  |
| C17B | 0.9041(2)   | 0.9004(2)   | 0.40418(17) | 0.0602(6)  |
| C18B | 0.9941(2)   | 0.8756(2)   | 0.37313(18) | 0.0651(6)  |
| C19B | 0.0562(2)   | 0.9533(2)   | 0.35433(17) | 0.0596(6)  |
| O2C  | 0.31640(12) | 0.15762(15) | 0.36296(10) | 0.0586(4)  |
| F1C  | 0.70440(13) | 0.13752(17) | 0.64149(11) | 0.0881(5)  |
| F2C  | 0.55312(14) | 0.18295(15) | 0.73486(9)  | 0.0782(5)  |
| N2C  | 0.47843(14) | 0.11335(16) | 0.39154(12) | 0.0487(4)  |
| N1C  | 0.40558(15) | 0.08570(19) | 0.25534(13) | 0.0562(5)  |
| C7C  | 0.2428(3)   | 0.9454(4)   | 0.1663(2)   | 0.0652(10) |
| C8C  | 0.3145(4)   | 0.0584(5)   | 0.1865(3)   | 0.0536(12) |
| C9C  | 0.3490(4)   | 0.0484(4)   | 0.1014(3)   | 0.0562(11) |
| C1C  | 0.3126(3)   | 0.9260(3)   | 0.0375(2)   | 0.0524(9)  |
| C2C  | 0.4021(3)   | 0.8603(3)   | 0.0419(2)   | 0.0766(10) |
| C3C  | 0.3655(6)   | 0.7342(5)   | 0.0032(4)   | 0.0991(17) |
| C4C  | 0.2743(5)   | 0.7025(4)   | 0.0457(3)   | 0.1080(16) |

## S55

|      |             |             |             |            |
|------|-------------|-------------|-------------|------------|
| C5C  | 0.1826(4)   | 0.7591(4)   | 0.0353(3)   | 0.0979(15) |
| C6C  | 0.2137(4)   | 0.8869(4)   | 0.0686(3)   | 0.0623(15) |
| C10C | 0.2691(3)   | 0.9166(3)   | 0.9468(2)   | 0.0637(9)  |
| C11C | 0.1557(3)   | 0.9331(4)   | 0.9474(2)   | 0.0611(10) |
| O1C  | 0.0963(2)   | 0.9437(3)   | 0.89132(17) | 0.0789(8)  |
| C12C | 0.1257(3)   | 0.9320(5)   | 0.0298(2)   | 0.0764(11) |
| C7F  | 0.2269(11)  | 0.9990(13)  | 0.1582(8)   | 0.063(4)   |
| C8F  | 0.3314(13)  | 0.0822(18)  | 0.1826(10)  | 0.053(5)   |
| C9F  | 0.3823(13)  | 0.0504(19)  | 0.1028(10)  | 0.055(5)   |
| C1F  | 0.3002(10)  | 0.9629(11)  | 0.0289(8)   | 0.051(4)   |
| C2F  | 0.3477(13)  | 0.8829(13)  | 0.9599(9)   | 0.085(5)   |
| C3F  | 0.4032(16)  | 0.8006(19)  | 0.9868(15)  | 0.112(7)   |
| C4F  | 0.3259(18)  | 0.7310(16)  | 0.0171(15)  | 0.078(6)   |
| C5F  | 0.2824(13)  | 0.8117(12)  | 0.0915(10)  | 0.087(5)   |
| C6F  | 0.2328(12)  | 0.9029(13)  | 0.0739(10)  | 0.063(7)   |
| C10F | 0.2164(9)   | 0.0130(11)  | 0.9897(9)   | 0.068(4)   |
| C11F | 0.1153(11)  | 0.9307(13)  | 0.9645(10)  | 0.062(4)   |
| O1F  | 0.0362(11)  | 0.9225(11)  | 0.9112(9)   | 0.095(4)   |
| C12F | 0.1255(9)   | 0.8553(12)  | 0.0118(8)   | 0.057(3)   |
| C13C | 0.39475(16) | 0.12025(18) | 0.33830(14) | 0.0455(5)  |
| C14C | 0.49182(16) | 0.13647(17) | 0.47987(14) | 0.0442(5)  |
| C15C | 0.59182(18) | 0.13142(19) | 0.51874(15) | 0.0532(5)  |
| C16C | 0.60924(19) | 0.1465(2)   | 0.60386(16) | 0.0576(6)  |
| C17C | 0.5315(2)   | 0.1686(2)   | 0.65107(15) | 0.0572(6)  |
| C18C | 0.4330(2)   | 0.1737(2)   | 0.61363(16) | 0.0581(6)  |
| C19C | 0.41263(18) | 0.15746(19) | 0.52769(15) | 0.0516(5)  |

Table S39. Bond lengths (Å) for *syn-25*.

|          |           |          |          |
|----------|-----------|----------|----------|
| N1A-C13A | 1.348(3)  | N1A-C8A  | 1.460(3) |
| N1A-H01  | 0.803(14) | O1A-C11A | 1.202(3) |
| O2A-C13A | 1.233(3)  | C1A-C10A | 1.517(3) |
| C1A-C2A  | 1.529(4)  | C1A-C6A  | 1.546(3) |

## S56

|           |           |           |           |
|-----------|-----------|-----------|-----------|
| C1A-C9A   | 1.548(4)  | C2A-C3A   | 1.488(5)  |
| C2A-H201  | 0.98      | C2A-H202  | 0.98      |
| C3A-C4A   | 1.466(5)  | C3A-H301  | 0.98      |
| C3A-H302  | 0.98      | C4A-C5A   | 1.501(4)  |
| C4A-H401  | 0.98      | C4A-H402  | 0.98      |
| C5A-C6A   | 1.550(4)  | C5A-H501  | 0.98      |
| C5A-H502  | 0.98      | C6A-C7A   | 1.518(4)  |
| C6A-C12A  | 1.551(4)  | C7A-C8A   | 1.544(4)  |
| C7A-H701  | 0.98      | C7A-H702  | 0.98      |
| C8A-C9A   | 1.529(4)  | C8A-H8A   | 0.99      |
| C9A-H901  | 0.98      | C9A-H902  | 0.98      |
| C10A-C11A | 1.513(4)  | C10A-H10A | 0.98      |
| C10A-H10B | 0.98      | C11A-C12A | 1.540(4)  |
| C12A-H12A | 0.98      | C12A-H12B | 0.98      |
| C13A-N2A  | 1.362(3)  | N2A-C14D  | 1.342(10) |
| N2A-C14A  | 1.454(8)  | N2A-H02   | 0.800(14) |
| C14A-C15A | 1.383(10) | C14A-C19A | 1.408(9)  |
| C15A-C16A | 1.378(9)  | C15A-H15A | 0.94      |
| C16A-F1A  | 1.337(10) | C16A-C17A | 1.375(9)  |
| C17A-F2A  | 1.343(8)  | C17A-C18A | 1.377(8)  |
| C18A-C19A | 1.383(9)  | C18A-H18A | 0.94      |
| C19A-H19A | 0.94      | C14D-C15D | 1.368(11) |
| C14D-C19D | 1.375(11) | C15D-C16D | 1.371(10) |
| C15D-H15D | 0.94      | C16D-F1D  | 1.359(11) |
| C16D-C17D | 1.367(10) | C17D-C18D | 1.369(9)  |
| C17D-F2D  | 1.370(9)  | C18D-C19D | 1.368(10) |
| C18D-H18D | 0.94      | C19D-H19D | 0.94      |
| O2B-C13B  | 1.235(3)  | N1B-C13B  | 1.354(3)  |
| N1B-C8B   | 1.451(3)  | N1B-H03   | 0.806(14) |
| N2B-C13B  | 1.358(3)  | N2B-C14B  | 1.396(3)  |
| N2B-H04   | 0.803(14) | F1B-C16B  | 1.331(3)  |
| F2B-C17B  | 1.354(3)  | C2B-C3B   | 1.517(4)  |



## S57

|           |           |           |           |
|-----------|-----------|-----------|-----------|
| C2B-C1B   | 1.532(4)  | C2B-H211  | 0.98      |
| C2B-H212  | 0.98      | C3B-C4B   | 1.505(5)  |
| C3B-H311  | 0.98      | C3B-H312  | 0.98      |
| C4B-C5B   | 1.502(5)  | C4B-H411  | 0.98      |
| C4B-H412  | 0.98      | C5B-C6B   | 1.540(4)  |
| C5B-H511  | 0.98      | C5B-H512  | 0.98      |
| C7B-C6B   | 1.526(4)  | C7B-C8B   | 1.541(3)  |
| C7B-H711  | 0.98      | C7B-H712  | 0.98      |
| C8B-C9B   | 1.544(4)  | C8B-H8B   | 0.99      |
| C9B-C1B   | 1.543(3)  | C9B-H911  | 0.98      |
| C9B-H912  | 0.98      | C1B-C10E  | 1.531(8)  |
| C1B-C6B   | 1.559(4)  | C1B-C10B  | 1.582(8)  |
| C6B-C12E  | 1.549(9)  | C6B-C12B  | 1.552(8)  |
| C10B-C11B | 1.503(9)  | C10B-H10C | 0.98      |
| C10B-H10D | 0.98      | C11B-O1B  | 1.216(8)  |
| C11B-C12B | 1.502(9)  | C12B-H12D | 0.98      |
| C12B-H12C | 0.98      | C10E-C11E | 1.501(9)  |
| C10E-H10E | 0.98      | C10E-H10F | 0.98      |
| C11E-O1E  | 1.215(9)  | C11E-C12E | 1.507(10) |
| C12E-H12E | 0.98      | C12E-H12F | 0.98      |
| C14B-C19B | 1.391(3)  | C14B-C15B | 1.397(3)  |
| C15B-C16B | 1.372(3)  | C15B-H15B | 0.94      |
| C16B-C17B | 1.367(4)  | C17B-C18B | 1.367(4)  |
| C18B-C19B | 1.375(4)  | C18B-H18B | 0.94      |
| C19B-H19B | 0.94      | O2C-C13C  | 1.234(3)  |
| F1C-C16C  | 1.350(3)  | F2C-C17C  | 1.358(3)  |
| N2C-C13C  | 1.353(3)  | N2C-C14C  | 1.406(3)  |
| N2C-H06   | 0.800(14) | N1C-C13C  | 1.350(3)  |
| N1C-C8F   | 1.448(15) | N1C-C8C   | 1.453(4)  |
| N1C-H05   | 0.802(13) | C7C-C6C   | 1.522(5)  |
| C7C-C8C   | 1.535(6)  | C7C-H7C1  | 0.98      |
| C7C-H7C2  | 0.98      | C8C-C9C   | 1.542(6)  |

## S58

|           |           |           |           |
|-----------|-----------|-----------|-----------|
| C8C-H8C   | 0.99      | C9C-C1C   | 1.529(6)  |
| C9C-H9C1  | 0.98      | C9C-H9C2  | 0.98      |
| C1C-C10C  | 1.531(5)  | C1C-C2C   | 1.532(5)  |
| C1C-C6C   | 1.550(6)  | C2C-C3C   | 1.510(6)  |
| C2C-H2C1  | 0.98      | C2C-H2C2  | 0.98      |
| C3C-C4C   | 1.557(7)  | C3C-H3C1  | 0.98      |
| C3C-H3C2  | 0.98      | C4C-C5C   | 1.495(7)  |
| C4C-H4C1  | 0.98      | C4C-H4C2  | 0.98      |
| C5C-C6C   | 1.528(6)  | C5C-H5C1  | 0.98      |
| C5C-H5C2  | 0.98      | C6C-C12C  | 1.528(6)  |
| C10C-C11C | 1.508(5)  | C10C-H10G | 0.98      |
| C10C-H10H | 0.98      | C11C-O1C  | 1.207(4)  |
| C11C-C12C | 1.515(5)  | C12C-H12G | 0.98      |
| C12C-H12H | 0.98      | C7F-C8F   | 1.526(14) |
| C7F-C6F   | 1.534(15) | C7F-H7F1  | 0.98      |
| C7F-H7F2  | 0.98      | C8F-C9F   | 1.532(14) |
| C8F-H8F   | 0.99      | C9F-C1F   | 1.514(14) |
| C9F-H9F1  | 0.98      | C9F-H9F2  | 0.98      |
| C1F-C2F   | 1.512(12) | C1F-C10F  | 1.536(14) |
| C1F-C6F   | 1.557(15) | C2F-C3F   | 1.532(14) |
| C2F-H2F1  | 0.98      | C2F-H2F2  | 0.98      |
| C3F-C4F   | 1.537(14) | C3F-H3F1  | 0.98      |
| C3F-H3F2  | 0.98      | C4F-C5F   | 1.540(14) |
| C4F-H4F1  | 0.98      | C4F-H4F2  | 0.98      |
| C5F-C6F   | 1.524(13) | C5F-H5F1  | 0.98      |
| C5F-H5F2  | 0.98      | C6F-C12F  | 1.530(15) |
| C10F-C11F | 1.487(13) | C10F-H10I | 0.98      |
| C10F-H10J | 0.98      | C11F-O1F  | 1.240(13) |
| C11F-C12F | 1.497(13) | C12F-H12I | 0.98      |
| C12F-H12J | 0.98      | C14C-C19C | 1.384(3)  |
| C14C-C15C | 1.394(3)  | C15C-C16C | 1.376(3)  |
| C15C-H15C | 0.94      | C16C-C17C | 1.363(4)  |

|           |          |           |          |
|-----------|----------|-----------|----------|
| C17C-C18C | 1.368(4) | C18C-C19C | 1.386(3) |
| C18C-H18C | 0.94     | C19C-H19C | 0.94     |

Table S40. Bond angles (°) for *syn*-**25**.

|               |          |              |          |
|---------------|----------|--------------|----------|
| C13A-N1A-C8A  | 123.6(2) | C13A-N1A-H01 | 117.(2)  |
| C8A-N1A-H01   | 120.(2)  | C10A-C1A-C2A | 115.4(2) |
| C10A-C1A-C6A  | 105.8(2) | C2A-C1A-C6A  | 112.9(2) |
| C10A-C1A-C9A  | 111.2(2) | C2A-C1A-C9A  | 109.0(2) |
| C6A-C1A-C9A   | 101.7(2) | C3A-C2A-C1A  | 112.7(2) |
| C3A-C2A-H201  | 109.0    | C1A-C2A-H201 | 109.0    |
| C3A-C2A-H202  | 109.0    | C1A-C2A-H202 | 109.0    |
| H201-C2A-H202 | 107.8    | C4A-C3A-C2A  | 110.4(3) |
| C4A-C3A-H301  | 109.6    | C2A-C3A-H301 | 109.6    |
| C4A-C3A-H302  | 109.6    | C2A-C3A-H302 | 109.6    |
| H301-C3A-H302 | 108.1    | C3A-C4A-C5A  | 112.7(3) |
| C3A-C4A-H401  | 109.1    | C5A-C4A-H401 | 109.1    |
| C3A-C4A-H402  | 109.1    | C5A-C4A-H402 | 109.1    |
| H401-C4A-H402 | 107.8    | C4A-C5A-C6A  | 113.9(2) |
| C4A-C5A-H501  | 108.8    | C6A-C5A-H501 | 108.8    |
| C4A-C5A-H502  | 108.8    | C6A-C5A-H502 | 108.8    |
| H501-C5A-H502 | 107.7    | C7A-C6A-C1A  | 104.8(2) |
| C7A-C6A-C5A   | 113.2(2) | C1A-C6A-C5A  | 111.1(2) |
| C7A-C6A-C12A  | 114.9(2) | C1A-C6A-C12A | 103.0(2) |
| C5A-C6A-C12A  | 109.3(2) | C6A-C7A-C8A  | 106.0(2) |
| C6A-C7A-H701  | 110.5    | C8A-C7A-H701 | 110.5    |
| C6A-C7A-H702  | 110.5    | C8A-C7A-H702 | 110.5    |
| H701-C7A-H702 | 108.7    | N1A-C8A-C9A  | 113.6(3) |
| N1A-C8A-C7A   | 111.3(2) | C9A-C8A-C7A  | 105.8(2) |
| N1A-C8A-H8A   | 108.6    | C9A-C8A-H8A  | 108.6    |
| C7A-C8A-H8A   | 108.6    | C8A-C9A-C1A  | 107.2(2) |
| C8A-C9A-H901  | 110.3    | C1A-C9A-H901 | 110.3    |
| C8A-C9A-H902  | 110.3    | C1A-C9A-H902 | 110.3    |

## S60

|                |            |                |            |
|----------------|------------|----------------|------------|
| H901-C9A-H902  | 108.5      | C11A-C10A-C1A  | 104.4(2)   |
| C11A-C10A-H10A | 110.9      | C1A-C10A-H10A  | 110.9      |
| C11A-C10A-H10B | 110.9      | C1A-C10A-H10B  | 110.9      |
| H10A-C10A-H10B | 108.9      | O1A-C11A-C10A  | 127.5(3)   |
| O1A-C11A-C12A  | 124.8(3)   | C10A-C11A-C12A | 107.8(2)   |
| C11A-C12A-C6A  | 106.5(2)   | C11A-C12A-H12A | 110.4      |
| C6A-C12A-H12A  | 110.4      | C11A-C12A-H12B | 110.4      |
| C6A-C12A-H12B  | 110.4      | H12A-C12A-H12B | 108.6      |
| O2A-C13A-N1A   | 123.0(2)   | O2A-C13A-N2A   | 122.4(2)   |
| N1A-C13A-N2A   | 114.6(2)   | C14D-N2A-C13A  | 133.4(7)   |
| C13A-N2A-C14A  | 123.9(5)   | C14D-N2A-H02   | 114.(2)    |
| C13A-N2A-H02   | 110.4(19)  | C14A-N2A-H02   | 124.9(19)  |
| C15A-C14A-C19A | 116.5(7)   | C15A-C14A-N2A  | 126.3(7)   |
| C19A-C14A-N2A  | 117.1(7)   | C16A-C15A-C14A | 120.4(8)   |
| C16A-C15A-H15A | 119.8      | C14A-C15A-H15A | 119.8      |
| F1A-C16A-C17A  | 117.2(7)   | F1A-C16A-C15A  | 120.8(7)   |
| C17A-C16A-C15A | 121.9(7)   | F2A-C17A-C16A  | 121.2(7)   |
| F2A-C17A-C18A  | 119.0(7)   | C16A-C17A-C18A | 119.7(7)   |
| C17A-C18A-C19A | 117.9(7)   | C17A-C18A-H18A | 121.0      |
| C19A-C18A-H18A | 121.0      | C18A-C19A-C14A | 123.4(7)   |
| C18A-C19A-H19A | 118.3      | C14A-C19A-H19A | 118.3      |
| N2A-C14D-C15D  | 119.0(9)   | N2A-C14D-C19D  | 118.4(10)  |
| C15D-C14D-C19D | 122.5(9)   | C14D-C15D-C16D | 117.6(10)  |
| C14D-C15D-H15D | 121.2      | C16D-C15D-H15D | 121.2      |
| F1D-C16D-C17D  | 121.2(9)   | F1D-C16D-C15D  | 118.5(10)  |
| C17D-C16D-C15D | 120.3(9)   | C16D-C17D-C18D | 121.8(8)   |
| C16D-C17D-F2D  | 118.0(9)   | C18D-C17D-F2D  | 120.2(8)   |
| C19D-C18D-C17D | 118.5(8)   | C19D-C18D-H18D | 120.7      |
| C17D-C18D-H18D | 120.7      | C18D-C19D-C14D | 119.2(9)   |
| C18D-C19D-H19D | 120.4      | C14D-C19D-H19D | 120.4      |
| C13B-N1B-C8B   | 122.27(19) | C13B-N1B-H03   | 116.4(18)  |
| C8B-N1B-H03    | 119.9(18)  | C13B-N2B-C14B  | 127.74(19) |

## S61

|               |            |                |          |
|---------------|------------|----------------|----------|
| C13B-N2B-H04  | 119.(2)    | C14B-N2B-H04   | 113.(2)  |
| C3B-C2B-C1B   | 114.2(3)   | C3B-C2B-H211   | 108.7    |
| C1B-C2B-H211  | 108.7      | C3B-C2B-H212   | 108.7    |
| C1B-C2B-H212  | 108.7      | H211-C2B-H212  | 107.6    |
| C4B-C3B-C2B   | 110.7(2)   | C4B-C3B-H311   | 109.5    |
| C2B-C3B-H311  | 109.5      | C4B-C3B-H312   | 109.5    |
| C2B-C3B-H312  | 109.5      | H311-C3B-H312  | 108.1    |
| C5B-C4B-C3B   | 111.2(3)   | C5B-C4B-H411   | 109.4    |
| C3B-C4B-H411  | 109.4      | C5B-C4B-H412   | 109.4    |
| C3B-C4B-H412  | 109.4      | H411-C4B-H412  | 108.0    |
| C4B-C5B-C6B   | 113.9(2)   | C4B-C5B-H511   | 108.8    |
| C6B-C5B-H511  | 108.8      | C4B-C5B-H512   | 108.8    |
| C6B-C5B-H512  | 108.8      | H511-C5B-H512  | 107.7    |
| C6B-C7B-C8B   | 105.47(19) | C6B-C7B-H711   | 110.6    |
| C8B-C7B-H711  | 110.6      | C6B-C7B-H712   | 110.6    |
| C8B-C7B-H712  | 110.6      | H711-C7B-H712  | 108.8    |
| N1B-C8B-C7B   | 109.6(2)   | N1B-C8B-C9B    | 114.7(2) |
| C7B-C8B-C9B   | 105.93(19) | N1B-C8B-H8B    | 108.8    |
| C7B-C8B-H8B   | 108.8      | C9B-C8B-H8B    | 108.8    |
| C1B-C9B-C8B   | 107.49(18) | C1B-C9B-H911   | 110.2    |
| C8B-C9B-H911  | 110.2      | C1B-C9B-H912   | 110.2    |
| C8B-C9B-H912  | 110.2      | H911-C9B-H912  | 108.5    |
| C10E-C1B-C2B  | 102.7(5)   | C10E-C1B-C9B   | 117.4(4) |
| C2B-C1B-C9B   | 110.1(2)   | C10E-C1B-C6B   | 111.5(5) |
| C2B-C1B-C6B   | 112.5(2)   | C9B-C1B-C6B    | 103.0(2) |
| C2B-C1B-C10B  | 123.7(5)   | C9B-C1B-C10B   | 107.6(4) |
| C6B-C1B-C10B  | 97.6(4)    | C7B-C6B-C5B    | 113.3(2) |
| C7B-C6B-C12E  | 123.3(5)   | C5B-C6B-C12E   | 105.4(5) |
| C7B-C6B-C12B  | 104.8(5)   | C5B-C6B-C12B   | 112.4(4) |
| C7B-C6B-C1B   | 104.07(19) | C5B-C6B-C1B    | 113.2(2) |
| C12E-C6B-C1B  | 96.4(5)    | C12B-C6B-C1B   | 108.4(4) |
| C11B-C10B-C1B | 109.6(5)   | C11B-C10B-H10C | 109.8    |

## S62

|                |            |                |            |
|----------------|------------|----------------|------------|
| C1B-C10B-H10C  | 109.8      | C11B-C10B-H10D | 109.8      |
| C1B-C10B-H10D  | 109.8      | H10C-C10B-H10D | 108.2      |
| O1B-C11B-C12B  | 126.8(8)   | O1B-C11B-C10B  | 124.2(8)   |
| C12B-C11B-C10B | 108.9(6)   | C11B-C12B-C6B  | 102.2(6)   |
| C11B-C12B-H12D | 111.3      | C6B-C12B-H12D  | 111.3      |
| C11B-C12B-H12C | 111.3      | C6B-C12B-H12C  | 111.3      |
| H12D-C12B-H12C | 109.2      | C11E-C10E-C1B  | 98.4(6)    |
| C11E-C10E-H10E | 112.1      | C1B-C10E-H10E  | 112.1      |
| C11E-C10E-H10F | 112.1      | C1B-C10E-H10F  | 112.1      |
| H10E-C10E-H10F | 109.7      | O1E-C11E-C10E  | 127.3(9)   |
| O1E-C11E-C12E  | 121.4(9)   | C10E-C11E-C12E | 111.1(7)   |
| C11E-C12E-C6B  | 109.0(6)   | C11E-C12E-H12E | 109.9      |
| C6B-C12E-H12E  | 109.9      | C11E-C12E-H12F | 109.9      |
| C6B-C12E-H12F  | 109.9      | H12E-C12E-H12F | 108.3      |
| O2B-C13B-N1B   | 121.6(2)   | O2B-C13B-N2B   | 124.2(2)   |
| N1B-C13B-N2B   | 114.18(19) | C19B-C14B-N2B  | 118.6(2)   |
| C19B-C14B-C15B | 118.8(2)   | N2B-C14B-C15B  | 122.5(2)   |
| C16B-C15B-C14B | 118.7(2)   | C16B-C15B-H15B | 120.6      |
| C14B-C15B-H15B | 120.6      | F1B-C16B-C17B  | 118.6(2)   |
| F1B-C16B-C15B  | 119.4(2)   | C17B-C16B-C15B | 122.0(2)   |
| F2B-C17B-C18B  | 120.9(2)   | F2B-C17B-C16B  | 119.5(2)   |
| C18B-C17B-C16B | 119.7(2)   | C17B-C18B-C19B | 119.8(2)   |
| C17B-C18B-H18B | 120.1      | C19B-C18B-H18B | 120.1      |
| C18B-C19B-C14B | 120.9(2)   | C18B-C19B-H19B | 119.5      |
| C14B-C19B-H19B | 119.5      | C13C-N2C-C14C  | 129.36(19) |
| C13C-N2C-H06   | 114.8(19)  | C14C-N2C-H06   | 115.8(19)  |
| C13C-N1C-C8F   | 128.0(8)   | C13C-N1C-C8C   | 121.2(3)   |
| C13C-N1C-H05   | 119.7(18)  | C8F-N1C-H05    | 112.(2)    |
| C8C-N1C-H05    | 116.1(18)  | C6C-C7C-C8C    | 106.2(3)   |
| C6C-C7C-H7C1   | 110.5      | C8C-C7C-H7C1   | 110.5      |
| C6C-C7C-H7C2   | 110.5      | C8C-C7C-H7C2   | 110.5      |
| H7C1-C7C-H7C2  | 108.7      | N1C-C8C-C7C    | 113.1(4)   |

## S63

|                |           |                |          |
|----------------|-----------|----------------|----------|
| N1C-C8C-C9C    | 111.6(4)  | C7C-C8C-C9C    | 105.5(3) |
| N1C-C8C-H8C    | 108.8     | C7C-C8C-H8C    | 108.8    |
| C9C-C8C-H8C    | 108.8     | C1C-C9C-C8C    | 107.6(4) |
| C1C-C9C-H9C1   | 110.2     | C8C-C9C-H9C1   | 110.2    |
| C1C-C9C-H9C2   | 110.2     | C8C-C9C-H9C2   | 110.2    |
| H9C1-C9C-H9C2  | 108.5     | C9C-C1C-C10C   | 112.0(4) |
| C9C-C1C-C2C    | 109.6(3)  | C10C-C1C-C2C   | 114.1(3) |
| C9C-C1C-C6C    | 102.6(3)  | C10C-C1C-C6C   | 104.4(3) |
| C2C-C1C-C6C    | 113.5(4)  | C3C-C2C-C1C    | 113.9(4) |
| C3C-C2C-H2C1   | 108.8     | C1C-C2C-H2C1   | 108.8    |
| C3C-C2C-H2C2   | 108.8     | C1C-C2C-H2C2   | 108.8    |
| H2C1-C2C-H2C2  | 107.7     | C2C-C3C-C4C    | 109.5(4) |
| C2C-C3C-H3C1   | 109.8     | C4C-C3C-H3C1   | 109.8    |
| C2C-C3C-H3C2   | 109.8     | C4C-C3C-H3C2   | 109.8    |
| H3C1-C3C-H3C2  | 108.2     | C5C-C4C-C3C    | 111.9(4) |
| C5C-C4C-H4C1   | 109.2     | C3C-C4C-H4C1   | 109.2    |
| C5C-C4C-H4C2   | 109.2     | C3C-C4C-H4C2   | 109.2    |
| H4C1-C4C-H4C2  | 107.9     | C4C-C5C-C6C    | 113.5(4) |
| C4C-C5C-H5C1   | 108.9     | C6C-C5C-H5C1   | 108.9    |
| C4C-C5C-H5C2   | 108.9     | C6C-C5C-H5C2   | 108.9    |
| H5C1-C5C-H5C2  | 107.7     | C7C-C6C-C5C    | 113.7(4) |
| C7C-C6C-C12C   | 112.8(4)  | C5C-C6C-C12C   | 109.0(4) |
| C7C-C6C-C1C    | 104.3(4)  | C5C-C6C-C1C    | 113.2(4) |
| C12C-C6C-C1C   | 103.4(3)  | C11C-C10C-C1C  | 105.1(3) |
| C11C-C10C-H10G | 110.7     | C1C-C10C-H10G  | 110.7    |
| C11C-C10C-H10H | 110.7     | C1C-C10C-H10H  | 110.7    |
| H10G-C10C-H10H | 108.8     | O1C-C11C-C10C  | 126.5(3) |
| O1C-C11C-C12C  | 124.4(4)  | C10C-C11C-C12C | 109.1(3) |
| C11C-C12C-C6C  | 105.3(3)  | C11C-C12C-H12G | 110.7    |
| C6C-C12C-H12G  | 110.7     | C11C-C12C-H12H | 110.7    |
| C6C-C12C-H12H  | 110.7     | H12G-C12C-H12H | 108.8    |
| C8F-C7F-C6F    | 105.5(11) | C8F-C7F-H7F1   | 110.6    |

## S64

|                |           |                |           |
|----------------|-----------|----------------|-----------|
| C6F-C7F-H7F1   | 110.6     | C8F-C7F-H7F2   | 110.6     |
| C6F-C7F-H7F2   | 110.6     | H7F1-C7F-H7F2  | 108.8     |
| N1C-C8F-C7F    | 115.2(13) | N1C-C8F-C9F    | 109.9(14) |
| C7F-C8F-C9F    | 106.9(12) | N1C-C8F-H8F    | 108.2     |
| C7F-C8F-H8F    | 108.2     | C9F-C8F-H8F    | 108.2     |
| C1F-C9F-C8F    | 106.9(11) | C1F-C9F-H9F1   | 110.3     |
| C8F-C9F-H9F1   | 110.3     | C1F-C9F-H9F2   | 110.3     |
| C8F-C9F-H9F2   | 110.3     | H9F1-C9F-H9F2  | 108.6     |
| C2F-C1F-C9F    | 113.6(12) | C2F-C1F-C10F   | 111.0(11) |
| C9F-C1F-C10F   | 113.6(13) | C2F-C1F-C6F    | 113.1(11) |
| C9F-C1F-C6F    | 103.4(11) | C10F-C1F-C6F   | 101.4(9)  |
| C1F-C2F-C3F    | 114.8(13) | C1F-C2F-H2F1   | 108.6     |
| C3F-C2F-H2F1   | 108.6     | C1F-C2F-H2F2   | 108.6     |
| C3F-C2F-H2F2   | 108.6     | H2F1-C2F-H2F2  | 107.6     |
| C2F-C3F-C4F    | 110.5(15) | C2F-C3F-H3F1   | 109.6     |
| C4F-C3F-H3F1   | 109.6     | C2F-C3F-H3F2   | 109.6     |
| C4F-C3F-H3F2   | 109.6     | H3F1-C3F-H3F2  | 108.1     |
| C3F-C4F-C5F    | 108.9(15) | C3F-C4F-H4F1   | 109.9     |
| C5F-C4F-H4F1   | 109.9     | C3F-C4F-H4F2   | 109.9     |
| C5F-C4F-H4F2   | 109.9     | H4F1-C4F-H4F2  | 108.3     |
| C6F-C5F-C4F    | 116.1(13) | C6F-C5F-H5F1   | 108.3     |
| C4F-C5F-H5F1   | 108.3     | C6F-C5F-H5F2   | 108.3     |
| C4F-C5F-H5F2   | 108.3     | H5F1-C5F-H5F2  | 107.4     |
| C5F-C6F-C12F   | 112.2(12) | C5F-C6F-C7F    | 110.9(12) |
| C12F-C6F-C7F   | 112.7(12) | C5F-C6F-C1F    | 113.3(12) |
| C12F-C6F-C1F   | 103.8(10) | C7F-C6F-C1F    | 103.4(11) |
| C11F-C10F-C1F  | 105.8(10) | C11F-C10F-H10I | 110.6     |
| C1F-C10F-H10I  | 110.6     | C11F-C10F-H10J | 110.6     |
| C1F-C10F-H10J  | 110.6     | H10I-C10F-H10J | 108.7     |
| O1F-C11F-C10F  | 126.3(12) | O1F-C11F-C12F  | 125.0(12) |
| C10F-C11F-C12F | 108.6(9)  | C11F-C12F-C6F  | 105.8(10) |
| C11F-C12F-H12I | 110.6     | C6F-C12F-H12I  | 110.6     |



|                |            |                |            |
|----------------|------------|----------------|------------|
| C11F-C12F-H12J | 110.6      | C6F-C12F-H12J  | 110.6      |
| H12I-C12F-H12J | 108.7      | O2C-C13C-N1C   | 122.4(2)   |
| O2C-C13C-N2C   | 123.5(2)   | N1C-C13C-N2C   | 114.06(19) |
| C19C-C14C-C15C | 119.5(2)   | C19C-C14C-N2C  | 124.80(19) |
| C15C-C14C-N2C  | 115.65(19) | C16C-C15C-C14C | 119.1(2)   |
| C16C-C15C-H15C | 120.5      | C14C-C15C-H15C | 120.5      |
| F1C-C16C-C17C  | 118.9(2)   | F1C-C16C-C15C  | 119.8(2)   |
| C17C-C16C-C15C | 121.3(2)   | F2C-C17C-C16C  | 118.8(2)   |
| F2C-C17C-C18C  | 121.0(2)   | C16C-C17C-C18C | 120.1(2)   |
| C17C-C18C-C19C | 119.9(2)   | C17C-C18C-H18C | 120.1      |
| C19C-C18C-H18C | 120.1      | C14C-C19C-C18C | 120.1(2)   |
| C14C-C19C-H19C | 119.9      | C18C-C19C-H19C | 119.9      |

Table S41. Torsion angles (°) for *syn*-**25**.

|                    |           |                   |           |
|--------------------|-----------|-------------------|-----------|
| C10A-C1A-C2A-C3A   | -70.0(3)  | C6A-C1A-C2A-C3A   | 51.8(3)   |
| C9A-C1A-C2A-C3A    | 164.1(3)  | C1A-C2A-C3A-C4A   | -58.3(4)  |
| C2A-C3A-C4A-C5A    | 58.8(4)   | C3A-C4A-C5A-C6A   | -53.3(4)  |
| C10A-C1A-C6A-C7A   | -154.4(2) | C2A-C1A-C6A-C7A   | 78.5(3)   |
| C9A-C1A-C6A-C7A    | -38.1(2)  | C10A-C1A-C6A-C5A  | 83.0(3)   |
| C2A-C1A-C6A-C5A    | -44.1(3)  | C9A-C1A-C6A-C5A   | -160.7(2) |
| C10A-C1A-C6A-C12A  | -33.9(3)  | C2A-C1A-C6A-C12A  | -161.0(2) |
| C9A-C1A-C6A-C12A   | 82.3(2)   | C4A-C5A-C6A-C7A   | -72.5(3)  |
| C4A-C5A-C6A-C1A    | 45.0(3)   | C4A-C5A-C6A-C12A  | 158.1(3)  |
| C1A-C6A-C7A-C8A    | 31.7(3)   | C5A-C6A-C7A-C8A   | 153.0(2)  |
| C12A-C6A-C7A-C8A   | -80.5(3)  | C13A-N1A-C8A-C9A  | 95.9(3)   |
| C13A-N1A-C8A-C7A   | -144.7(2) | C6A-C7A-C8A-N1A   | -136.1(2) |
| C6A-C7A-C8A-C9A    | -12.2(3)  | N1A-C8A-C9A-C1A   | 110.5(2)  |
| C7A-C8A-C9A-C1A    | -11.9(3)  | C10A-C1A-C9A-C8A  | 143.0(2)  |
| C2A-C1A-C9A-C8A    | -88.7(3)  | C6A-C1A-C9A-C8A   | 30.7(3)   |
| C2A-C1A-C10A-C11A  | 160.4(2)  | C6A-C1A-C10A-C11A | 34.9(3)   |
| C9A-C1A-C10A-C11A  | -74.7(3)  | C1A-C10A-C11A-O1A | 158.1(3)  |
| C1A-C10A-C11A-C12A | -21.9(3)  | O1A-C11A-C12A-C6A | -179.1(3) |

## S66

|                     |            |                     |            |
|---------------------|------------|---------------------|------------|
| C10A-C11A-C12A-C6A  | 0.9(3)     | C7A-C6A-C12A-C11A   | 133.2(2)   |
| C1A-C6A-C12A-C11A   | 19.9(3)    | C5A-C6A-C12A-C11A   | -98.3(3)   |
| C8A-N1A-C13A-O2A    | 2.5(4)     | C8A-N1A-C13A-N2A    | -177.5(2)  |
| O2A-C13A-N2A-C14D   | 21.4(14)   | N1A-C13A-N2A-C14D   | -158.6(14) |
| O2A-C13A-N2A-C14A   | 11.7(10)   | N1A-C13A-N2A-C14A   | -168.3(9)  |
| C13A-N2A-C14A-C15A  | -21.(2)    | C13A-N2A-C14A-C19A  | 155.9(10)  |
| C19A-C14A-C15A-C16A | 0.(2)      | N2A-C14A-C15A-C16A  | 176.7(13)  |
| C14A-C15A-C16A-F1A  | 177.9(13)  | C14A-C15A-C16A-C17A | -0.6(19)   |
| F1A-C16A-C17A-F2A   | -0.3(14)   | C15A-C16A-C17A-F2A  | 178.3(10)  |
| F1A-C16A-C17A-C18A  | -175.9(9)  | C15A-C16A-C17A-C18A | 2.6(15)    |
| F2A-C17A-C18A-C19A  | -179.6(8)  | C16A-C17A-C18A-C19A | -3.8(14)   |
| C17A-C18A-C19A-C14A | 3.3(18)    | C15A-C14A-C19A-C18A | -1.(2)     |
| N2A-C14A-C19A-C18A  | -178.4(11) | C13A-N2A-C14D-C15D  | -22.(3)    |
| C13A-N2A-C14D-C19D  | 162.0(11)  | N2A-C14D-C15D-C16D  | -178.0(15) |
| C19D-C14D-C15D-C16D | -2.(3)     | C14D-C15D-C16D-F1D  | -178.5(16) |
| C14D-C15D-C16D-C17D | -1.(2)     | F1D-C16D-C17D-C18D  | -179.7(11) |
| C15D-C16D-C17D-C18D | 3.1(19)    | F1D-C16D-C17D-F2D   | -1.6(17)   |
| C15D-C16D-C17D-F2D  | -178.8(12) | C16D-C17D-C18D-C19D | -1.5(17)   |
| F2D-C17D-C18D-C19D  | -179.6(10) | C17D-C18D-C19D-C14D | -2.(2)     |
| N2A-C14D-C19D-C18D  | 179.6(14)  | C15D-C14D-C19D-C18D | 4.(3)      |
| C1B-C2B-C3B-C4B     | 55.5(4)    | C2B-C3B-C4B-C5B     | -58.5(4)   |
| C3B-C4B-C5B-C6B     | 55.2(3)    | C13B-N1B-C8B-C7B    | 166.5(2)   |
| C13B-N1B-C8B-C9B    | -74.5(3)   | C6B-C7B-C8B-N1B     | 144.2(2)   |
| C6B-C7B-C8B-C9B     | 19.9(3)    | N1B-C8B-C9B-C1B     | -117.7(2)  |
| C7B-C8B-C9B-C1B     | 3.4(3)     | C3B-C2B-C1B-C10E    | 73.0(5)    |
| C3B-C2B-C1B-C9B     | -161.2(2)  | C3B-C2B-C1B-C6B     | -47.0(3)   |
| C3B-C2B-C1B-C10B    | 69.7(5)    | C8B-C9B-C1B-C10E    | -147.5(6)  |
| C8B-C9B-C1B-C2B     | 95.5(2)    | C8B-C9B-C1B-C6B     | -24.6(3)   |
| C8B-C9B-C1B-C10B    | -127.0(5)  | C8B-C7B-C6B-C5B     | -158.7(2)  |
| C8B-C7B-C6B-C12E    | 72.3(6)    | C8B-C7B-C6B-C12B    | 78.4(4)    |
| C8B-C7B-C6B-C1B     | -35.4(3)   | C4B-C5B-C6B-C7B     | 71.4(3)    |
| C4B-C5B-C6B-C12E    | -150.9(5)  | C4B-C5B-C6B-C12B    | -170.0(5)  |

## S67

|                     |            |                     |           |
|---------------------|------------|---------------------|-----------|
| C4B-C5B-C6B-C1B     | -46.8(3)   | C10E-C1B-C6B-C7B    | 163.6(5)  |
| C2B-C1B-C6B-C7B     | -81.7(3)   | C9B-C1B-C6B-C7B     | 36.8(3)   |
| C10B-C1B-C6B-C7B    | 146.8(5)   | C10E-C1B-C6B-C5B    | -73.0(5)  |
| C2B-C1B-C6B-C5B     | 41.7(3)    | C9B-C1B-C6B-C5B     | 160.2(2)  |
| C10B-C1B-C6B-C5B    | -89.7(5)   | C10E-C1B-C6B-C12E   | 36.8(6)   |
| C2B-C1B-C6B-C12E    | 151.5(5)   | C9B-C1B-C6B-C12E    | -90.0(5)  |
| C2B-C1B-C6B-C12B    | 167.2(5)   | C9B-C1B-C6B-C12B    | -74.3(5)  |
| C10B-C1B-C6B-C12B   | 35.7(5)    | C2B-C1B-C10B-C11B   | -147.6(5) |
| C9B-C1B-C10B-C11B   | 82.2(6)    | C6B-C1B-C10B-C11B   | -24.0(7)  |
| C1B-C10B-C11B-O1B   | -172.8(8)  | C1B-C10B-C11B-C12B  | 4.3(10)   |
| O1B-C11B-C12B-C6B   | -165.2(8)  | C10B-C11B-C12B-C6B  | 17.9(9)   |
| C7B-C6B-C12B-C11B   | -145.5(5)  | C5B-C6B-C12B-C11B   | 91.0(6)   |
| C1B-C6B-C12B-C11B   | -34.9(7)   | C2B-C1B-C10E-C11E   | -156.1(6) |
| C9B-C1B-C10E-C11E   | 83.0(7)    | C6B-C1B-C10E-C11E   | -35.4(7)  |
| C1B-C10E-C11E-O1E   | -166.0(11) | C1B-C10E-C11E-C12E  | 18.5(10)  |
| O1E-C11E-C12E-C6B   | -172.6(10) | C10E-C11E-C12E-C6B  | 3.3(12)   |
| C7B-C6B-C12E-C11E   | -134.4(7)  | C5B-C6B-C12E-C11E   | 93.4(8)   |
| C1B-C6B-C12E-C11E   | -22.8(8)   | C8B-N1B-C13B-O2B    | 6.5(4)    |
| C8B-N1B-C13B-N2B    | -173.6(2)  | C14B-N2B-C13B-O2B   | 1.8(4)    |
| C14B-N2B-C13B-N1B   | -178.1(2)  | C13B-N2B-C14B-C19B  | 151.3(2)  |
| C13B-N2B-C14B-C15B  | -30.7(4)   | C19B-C14B-C15B-C16B | -2.4(3)   |
| N2B-C14B-C15B-C16B  | 179.6(2)   | C14B-C15B-C16B-F1B  | -179.5(2) |
| C14B-C15B-C16B-C17B | 1.4(4)     | F1B-C16B-C17B-F2B   | 0.9(4)    |
| C15B-C16B-C17B-F2B  | -179.9(2)  | F1B-C16B-C17B-C18B  | -178.3(2) |
| C15B-C16B-C17B-C18B | 0.9(4)     | F2B-C17B-C18B-C19B  | 178.8(2)  |
| C16B-C17B-C18B-C19B | -2.1(4)    | C17B-C18B-C19B-C14B | 1.0(4)    |
| N2B-C14B-C19B-C18B  | 179.4(2)   | C15B-C14B-C19B-C18B | 1.3(4)    |
| C13C-N1C-C8C-C7C    | -74.6(4)   | C13C-N1C-C8C-C9C    | 166.6(3)  |
| C6C-C7C-C8C-N1C     | -137.1(4)  | C6C-C7C-C8C-C9C     | -14.8(5)  |
| N1C-C8C-C9C-C1C     | 114.5(4)   | C7C-C8C-C9C-C1C     | -8.8(5)   |
| C8C-C9C-C1C-C10C    | 139.7(4)   | C8C-C9C-C1C-C2C     | -92.7(4)  |
| C8C-C9C-C1C-C6C     | 28.2(5)    | C9C-C1C-C2C-C3C     | 162.3(4)  |

## S68

|                    |            |                   |            |
|--------------------|------------|-------------------|------------|
| C10C-C1C-C2C-C3C   | -71.2(5)   | C6C-C1C-C2C-C3C   | 48.3(5)    |
| C1C-C2C-C3C-C4C    | -54.4(6)   | C2C-C3C-C4C-C5C   | 57.8(6)    |
| C3C-C4C-C5C-C6C    | -55.0(5)   | C8C-C7C-C6C-C5C   | 156.3(4)   |
| C8C-C7C-C6C-C12C   | -78.9(5)   | C8C-C7C-C6C-C1C   | 32.5(5)    |
| C4C-C5C-C6C-C7C    | -71.5(5)   | C4C-C5C-C6C-C12C  | 161.8(4)   |
| C4C-C5C-C6C-C1C    | 47.3(5)    | C9C-C1C-C6C-C7C   | -37.1(5)   |
| C10C-C1C-C6C-C7C   | -154.2(3)  | C2C-C1C-C6C-C7C   | 81.0(4)    |
| C9C-C1C-C6C-C5C    | -161.2(4)  | C10C-C1C-C6C-C5C  | 81.7(4)    |
| C2C-C1C-C6C-C5C    | -43.1(5)   | C9C-C1C-C6C-C12C  | 81.0(4)    |
| C10C-C1C-C6C-C12C  | -36.0(4)   | C2C-C1C-C6C-C12C  | -160.9(3)  |
| C9C-C1C-C10C-C11C  | -82.2(4)   | C2C-C1C-C10C-C11C | 152.6(3)   |
| C6C-C1C-C10C-C11C  | 28.1(4)    | C1C-C10C-C11C-O1C | 171.7(4)   |
| C1C-C10C-C11C-C12C | -9.6(5)    | O1C-C11C-C12C-C6C | 165.8(4)   |
| C10C-C11C-C12C-C6C | -13.0(5)   | C7C-C6C-C12C-C11C | 142.0(4)   |
| C5C-C6C-C12C-C11C  | -90.7(4)   | C1C-C6C-C12C-C11C | 30.0(5)    |
| C13C-N1C-C8F-C7F   | -65.9(18)  | C13C-N1C-C8F-C9F  | 173.3(10)  |
| C6F-C7F-C8F-N1C    | -107.9(15) | C6F-C7F-C8F-C9F   | 15.(2)     |
| N1C-C8F-C9F-C1F    | 135.0(15)  | C7F-C8F-C9F-C1F   | 9.(2)      |
| C8F-C9F-C1F-C2F    | -151.8(16) | C8F-C9F-C1F-C10F  | 80.1(19)   |
| C8F-C9F-C1F-C6F    | -28.9(19)  | C9F-C1F-C2F-C3F   | 69.6(19)   |
| C10F-C1F-C2F-C3F   | -160.9(14) | C6F-C1F-C2F-C3F   | -47.8(18)  |
| C1F-C2F-C3F-C4F    | 57.(2)     | C2F-C3F-C4F-C5F   | -57.(2)    |
| C3F-C4F-C5F-C6F    | 53.(2)     | C4F-C5F-C6F-C12F  | 71.9(19)   |
| C4F-C5F-C6F-C7F    | -161.1(15) | C4F-C5F-C6F-C1F   | -45.2(19)  |
| C8F-C7F-C6F-C5F    | 89.8(16)   | C8F-C7F-C6F-C12F  | -143.5(14) |
| C8F-C7F-C6F-C1F    | -32.0(16)  | C2F-C1F-C6F-C5F   | 40.6(16)   |
| C9F-C1F-C6F-C5F    | -82.7(16)  | C10F-C1F-C6F-C5F  | 159.5(12)  |
| C2F-C1F-C6F-C12F   | -81.3(14)  | C9F-C1F-C6F-C12F  | 155.4(14)  |
| C10F-C1F-C6F-C12F  | 37.5(12)   | C2F-C1F-C6F-C7F   | 160.8(12)  |
| C9F-C1F-C6F-C7F    | 37.5(15)   | C10F-C1F-C6F-C7F  | -80.3(12)  |
| C2F-C1F-C10F-C11F  | 85.9(14)   | C9F-C1F-C10F-C11F | -144.6(13) |
| C6F-C1F-C10F-C11F  | -34.5(14)  | C1F-C10F-C11F-O1F | -159.4(18) |

|                     |           |                     |            |
|---------------------|-----------|---------------------|------------|
| C1F-C10F-C11F-C12F  | 18.5(17)  | O1F-C11F-C12F-C6F   | -176.3(18) |
| C10F-C11F-C12F-C6F  | 5.7(18)   | C5F-C6F-C12F-C11F   | -149.9(14) |
| C7F-C6F-C12F-C11F   | 84.0(16)  | C1F-C6F-C12F-C11F   | -27.2(15)  |
| C8F-N1C-C13C-O2C    | -2.0(10)  | C8C-N1C-C13C-O2C    | -18.8(4)   |
| C8F-N1C-C13C-N2C    | 179.9(10) | C8C-N1C-C13C-N2C    | 163.1(3)   |
| C14C-N2C-C13C-O2C   | 5.5(4)    | C14C-N2C-C13C-N1C   | -176.5(2)  |
| C13C-N2C-C14C-C19C  | 9.2(4)    | C13C-N2C-C14C-C15C  | -174.2(2)  |
| C19C-C14C-C15C-C16C | 0.5(3)    | N2C-C14C-C15C-C16C  | -176.2(2)  |
| C14C-C15C-C16C-F1C  | 177.4(2)  | C14C-C15C-C16C-C17C | -1.4(4)    |
| F1C-C16C-C17C-F2C   | 1.3(3)    | C15C-C16C-C17C-F2C  | -179.9(2)  |
| F1C-C16C-C17C-C18C  | -177.4(2) | C15C-C16C-C17C-C18C | 1.4(4)     |
| F2C-C17C-C18C-C19C  | -179.3(2) | C16C-C17C-C18C-C19C | -0.6(4)    |
| C15C-C14C-C19C-C18C | 0.2(3)    | N2C-C14C-C19C-C18C  | 176.7(2)   |
| C17C-C18C-C19C-C14C | -0.2(4)   |                     |            |

Table S42. Anisotropic atomic displacement parameters ( $\text{\AA}^2$ ) for *syn-25*.

The anisotropic atomic displacement factor exponent takes the form:  $-2\pi^2 [h^2 a^{*2} U_{11} + \dots + 2 h k a^* b^* U_{12}]$

|      | $U_{11}$   | $U_{22}$   | $U_{33}$   | $U_{23}$   | $U_{13}$    | $U_{12}$   |
|------|------------|------------|------------|------------|-------------|------------|
| N1A  | 0.0456(11) | 0.0607(13) | 0.1030(17) | 0.0416(12) | 0.0263(11)  | 0.0138(10) |
| O1A  | 0.0668(13) | 0.0897(15) | 0.155(2)   | 0.0545(15) | 0.0346(14)  | 0.0253(11) |
| O2A  | 0.0441(8)  | 0.0562(9)  | 0.0738(11) | 0.0185(8)  | 0.0185(8)   | 0.0112(7)  |
| C1A  | 0.0572(13) | 0.0513(12) | 0.0509(12) | 0.0214(10) | 0.0036(10)  | 0.0101(10) |
| C2A  | 0.093(2)   | 0.0724(17) | 0.0668(16) | 0.0327(14) | 0.0288(15)  | 0.0245(15) |
| C3A  | 0.087(2)   | 0.080(2)   | 0.104(2)   | 0.0391(18) | 0.0436(19)  | 0.0155(17) |
| C4A  | 0.0612(16) | 0.0671(17) | 0.111(3)   | 0.0276(17) | 0.0160(16)  | 0.0001(13) |
| C5A  | 0.0741(18) | 0.0649(16) | 0.0641(16) | 0.0164(13) | -0.0005(13) | 0.0036(13) |
| C6A  | 0.0588(13) | 0.0592(14) | 0.0480(12) | 0.0219(10) | 0.0084(10)  | 0.0113(11) |
| C7A  | 0.0716(16) | 0.0747(17) | 0.0699(16) | 0.0406(14) | 0.0091(13)  | 0.0152(13) |
| C8A  | 0.0515(13) | 0.0554(14) | 0.099(2)   | 0.0386(14) | 0.0192(13)  | 0.0112(11) |
| C9A  | 0.0617(15) | 0.0558(14) | 0.0841(19) | 0.0209(13) | -0.0058(13) | 0.0084(12) |
| C10A | 0.0729(17) | 0.0623(15) | 0.0691(16) | 0.0283(13) | 0.0027(13)  | 0.0180(13) |

## S70

|      |            |            |            |            |            |             |
|------|------------|------------|------------|------------|------------|-------------|
| C11A | 0.0512(14) | 0.0551(14) | 0.109(2)   | 0.0307(15) | 0.0210(14) | 0.0121(11)  |
| C12A | 0.0770(19) | 0.089(2)   | 0.0733(18) | 0.0348(16) | 0.0303(15) | 0.0131(16)  |
| C13A | 0.0448(12) | 0.0622(14) | 0.0564(13) | 0.0310(11) | 0.0137(10) | 0.0192(10)  |
| N2A  | 0.0503(12) | 0.0744(14) | 0.0613(12) | 0.0345(11) | 0.0211(10) | 0.0259(11)  |
| C14A | 0.051(4)   | 0.065(4)   | 0.041(4)   | 0.024(3)   | 0.008(4)   | 0.030(3)    |
| C15A | 0.058(4)   | 0.056(3)   | 0.057(4)   | 0.027(2)   | 0.018(4)   | 0.020(3)    |
| C16A | 0.081(5)   | 0.059(4)   | 0.068(4)   | 0.027(3)   | 0.031(4)   | 0.020(3)    |
| F1A  | 0.130(5)   | 0.059(2)   | 0.142(6)   | 0.025(3)   | 0.062(5)   | 0.008(3)    |
| C17A | 0.084(5)   | 0.058(3)   | 0.055(3)   | 0.024(3)   | 0.012(3)   | 0.025(4)    |
| F2A  | 0.177(7)   | 0.060(3)   | 0.096(3)   | 0.027(2)   | 0.027(5)   | 0.052(4)    |
| C18A | 0.051(5)   | 0.062(4)   | 0.065(3)   | 0.020(3)   | 0.009(3)   | 0.020(3)    |
| C19A | 0.052(4)   | 0.077(4)   | 0.060(3)   | 0.019(3)   | 0.005(3)   | 0.024(3)    |
| C14D | 0.058(5)   | 0.080(5)   | 0.040(4)   | 0.025(4)   | 0.007(5)   | 0.032(3)    |
| C15D | 0.072(6)   | 0.070(5)   | 0.059(5)   | 0.026(3)   | 0.018(5)   | 0.028(4)    |
| C16D | 0.084(5)   | 0.070(4)   | 0.069(4)   | 0.028(3)   | 0.023(5)   | 0.026(4)    |
| F1D  | 0.153(8)   | 0.071(4)   | 0.118(5)   | 0.035(3)   | 0.038(6)   | 0.015(5)    |
| C17D | 0.064(6)   | 0.051(4)   | 0.059(3)   | 0.023(3)   | 0.013(4)   | 0.016(4)    |
| F2D  | 0.172(8)   | 0.073(4)   | 0.092(3)   | 0.022(3)   | 0.020(5)   | 0.057(5)    |
| C18D | 0.065(5)   | 0.068(5)   | 0.064(3)   | 0.021(3)   | 0.008(3)   | 0.030(4)    |
| C19D | 0.062(5)   | 0.070(4)   | 0.056(3)   | 0.022(3)   | 0.010(3)   | 0.032(4)    |
| O2B  | 0.0406(8)  | 0.0718(11) | 0.0854(12) | 0.0461(9)  | 0.0162(8)  | 0.0151(7)   |
| N1B  | 0.0402(10) | 0.0625(12) | 0.0620(11) | 0.0304(9)  | 0.0145(9)  | 0.0139(9)   |
| N2B  | 0.0394(10) | 0.0723(13) | 0.0739(13) | 0.0429(11) | 0.0169(9)  | 0.0186(9)   |
| F1B  | 0.0775(11) | 0.1335(17) | 0.1422(18) | 0.0842(15) | 0.0537(12) | 0.0420(11)  |
| F2B  | 0.0747(10) | 0.0827(11) | 0.1088(13) | 0.0567(10) | 0.0269(9)  | 0.0061(8)   |
| C2B  | 0.0726(17) | 0.0843(19) | 0.0560(14) | 0.0298(14) | 0.0068(13) | 0.0008(15)  |
| C3B  | 0.087(2)   | 0.113(3)   | 0.0684(18) | 0.0428(18) | 0.0215(16) | 0.0125(19)  |
| C4B  | 0.0588(15) | 0.100(2)   | 0.0820(19) | 0.0515(17) | 0.0201(14) | 0.0095(15)  |
| C5B  | 0.0510(14) | 0.0785(18) | 0.0911(19) | 0.0530(16) | 0.0050(13) | -0.0025(12) |
| C7B  | 0.0509(13) | 0.0642(15) | 0.0588(14) | 0.0244(12) | 0.0051(11) | -0.0023(11) |
| C8B  | 0.0467(12) | 0.0573(13) | 0.0627(14) | 0.0258(11) | 0.0142(10) | 0.0077(10)  |
| C9B  | 0.0430(12) | 0.0682(15) | 0.0811(17) | 0.0418(14) | 0.0034(11) | 0.0028(11)  |

## S71

|      |            |            |            |            |             |             |
|------|------------|------------|------------|------------|-------------|-------------|
| C1B  | 0.0477(12) | 0.0725(16) | 0.0719(16) | 0.0457(14) | -0.0031(11) | -0.0002(11) |
| C6B  | 0.0463(12) | 0.0580(14) | 0.0797(17) | 0.0351(13) | 0.0086(11)  | 0.0030(10)  |
| C10B | 0.058(3)   | 0.069(5)   | 0.067(5)   | 0.037(4)   | 0.000(3)    | 0.006(3)    |
| C11B | 0.060(3)   | 0.063(4)   | 0.078(5)   | 0.041(4)   | 0.009(4)    | 0.011(3)    |
| O1B  | 0.099(4)   | 0.106(5)   | 0.139(7)   | 0.074(5)   | 0.030(4)    | 0.048(4)    |
| C12B | 0.064(3)   | 0.063(3)   | 0.079(5)   | 0.041(3)   | 0.009(4)    | 0.008(2)    |
| C10E | 0.053(3)   | 0.060(4)   | 0.068(4)   | 0.031(4)   | 0.007(3)    | 0.011(3)    |
| C11E | 0.056(3)   | 0.069(5)   | 0.078(5)   | 0.030(4)   | 0.007(4)    | 0.016(3)    |
| O1E  | 0.105(5)   | 0.112(6)   | 0.158(8)   | 0.068(6)   | 0.011(5)    | 0.060(5)    |
| C12E | 0.069(4)   | 0.064(4)   | 0.076(5)   | 0.033(4)   | 0.017(4)    | 0.011(3)    |
| C13B | 0.0411(11) | 0.0591(13) | 0.0519(12) | 0.0255(10) | 0.0121(9)   | 0.0104(9)   |
| C14B | 0.0431(11) | 0.0632(14) | 0.0496(12) | 0.0282(10) | 0.0080(9)   | 0.0122(10)  |
| C15B | 0.0490(12) | 0.0672(14) | 0.0599(13) | 0.0344(12) | 0.0162(10)  | 0.0201(11)  |
| C16B | 0.0431(12) | 0.0799(17) | 0.0645(14) | 0.0386(13) | 0.0177(10)  | 0.0183(11)  |
| C17B | 0.0556(14) | 0.0682(15) | 0.0649(15) | 0.0370(13) | 0.0108(11)  | 0.0074(12)  |
| C18B | 0.0704(16) | 0.0625(15) | 0.0742(16) | 0.0364(13) | 0.0192(13)  | 0.0194(13)  |
| C19B | 0.0572(14) | 0.0697(15) | 0.0654(15) | 0.0352(12) | 0.0200(11)  | 0.0244(12)  |
| O2C  | 0.0453(8)  | 0.0776(11) | 0.0529(9)  | 0.0217(8)  | 0.0102(7)   | 0.0246(8)   |
| F1C  | 0.0665(10) | 0.1115(14) | 0.0797(11) | 0.0343(10) | -0.0093(8)  | 0.0308(9)   |
| F2C  | 0.0913(11) | 0.0873(11) | 0.0526(8)  | 0.0291(8)  | 0.0002(7)   | 0.0150(9)   |
| N2C  | 0.0406(9)  | 0.0571(11) | 0.0503(10) | 0.0203(8)  | 0.0111(8)   | 0.0172(8)   |
| N1C  | 0.0440(10) | 0.0712(13) | 0.0499(11) | 0.0177(9)  | 0.0100(8)   | 0.0181(9)   |
| C7C  | 0.061(2)   | 0.082(2)   | 0.0507(17) | 0.0289(17) | 0.0109(14)  | -0.0034(18) |
| C8C  | 0.049(2)   | 0.066(3)   | 0.0465(19) | 0.0210(17) | 0.0101(15)  | 0.0151(18)  |
| C9C  | 0.056(3)   | 0.062(2)   | 0.057(2)   | 0.0301(16) | 0.0139(17)  | 0.0099(19)  |
| C1C  | 0.0557(18) | 0.058(2)   | 0.0451(17) | 0.0232(15) | 0.0094(13)  | 0.0093(16)  |
| C2C  | 0.087(2)   | 0.083(2)   | 0.059(2)   | 0.0230(18) | 0.0105(17)  | 0.033(2)    |
| C3C  | 0.129(5)   | 0.081(3)   | 0.082(3)   | 0.021(2)   | 0.018(3)    | 0.039(3)    |
| C4C  | 0.157(4)   | 0.064(2)   | 0.087(3)   | 0.024(2)   | 0.004(3)    | 0.002(3)    |
| C5C  | 0.122(3)   | 0.086(3)   | 0.066(2)   | 0.032(2)   | -0.008(2)   | -0.033(2)   |
| C6C  | 0.060(2)   | 0.077(3)   | 0.048(2)   | 0.0309(18) | 0.0039(16)  | -0.0098(19) |
| C10C | 0.0624(19) | 0.083(2)   | 0.0489(17) | 0.0301(15) | 0.0120(14)  | 0.0128(16)  |

|      |            |            |            |            |             |            |
|------|------------|------------|------------|------------|-------------|------------|
| C11C | 0.053(2)   | 0.079(2)   | 0.0511(19) | 0.0295(17) | 0.0082(17)  | 0.0009(18) |
| O1C  | 0.0597(16) | 0.120(2)   | 0.0667(15) | 0.0510(15) | 0.0052(13)  | 0.0143(15) |
| C12C | 0.0530(18) | 0.119(3)   | 0.062(2)   | 0.043(2)   | 0.0136(15)  | 0.007(2)   |
| C7F  | 0.060(6)   | 0.069(6)   | 0.058(6)   | 0.025(5)   | 0.015(5)    | 0.004(5)   |
| C8F  | 0.053(7)   | 0.052(7)   | 0.055(7)   | 0.028(5)   | 0.004(5)    | 0.007(5)   |
| C9F  | 0.051(8)   | 0.065(7)   | 0.048(6)   | 0.022(5)   | 0.017(5)    | 0.007(5)   |
| C1F  | 0.055(6)   | 0.056(6)   | 0.046(6)   | 0.023(5)   | 0.015(4)    | 0.010(5)   |
| C2F  | 0.081(7)   | 0.092(7)   | 0.075(7)   | 0.023(5)   | 0.018(5)    | 0.018(6)   |
| C3F  | 0.105(9)   | 0.115(9)   | 0.102(9)   | 0.025(6)   | 0.022(6)    | 0.027(7)   |
| C4F  | 0.077(8)   | 0.070(7)   | 0.086(8)   | 0.026(5)   | 0.021(6)    | 0.017(6)   |
| C5F  | 0.101(8)   | 0.074(7)   | 0.091(7)   | 0.044(6)   | 0.001(5)    | 0.016(5)   |
| C6F  | 0.062(8)   | 0.063(8)   | 0.060(8)   | 0.024(5)   | 0.001(5)    | 0.006(6)   |
| C10F | 0.076(6)   | 0.071(6)   | 0.057(6)   | 0.029(5)   | 0.004(5)    | 0.013(5)   |
| C11F | 0.061(7)   | 0.066(6)   | 0.054(6)   | 0.024(5)   | 0.004(5)    | 0.006(5)   |
| O1F  | 0.085(8)   | 0.086(7)   | 0.091(8)   | 0.026(6)   | -0.023(6)   | 0.010(6)   |
| C12F | 0.054(5)   | 0.057(6)   | 0.054(6)   | 0.018(5)   | 0.007(4)    | 0.004(5)   |
| C13C | 0.0383(10) | 0.0463(11) | 0.0499(12) | 0.0172(9)  | 0.0078(9)   | 0.0076(9)  |
| C14C | 0.0427(10) | 0.0385(10) | 0.0497(11) | 0.0163(9)  | 0.0060(9)   | 0.0087(8)  |
| C15C | 0.0448(12) | 0.0520(12) | 0.0588(13) | 0.0179(10) | 0.0061(10)  | 0.0125(10) |
| C16C | 0.0519(13) | 0.0530(13) | 0.0610(14) | 0.0207(11) | -0.0069(11) | 0.0101(10) |
| C17C | 0.0668(15) | 0.0515(13) | 0.0486(12) | 0.0182(10) | 0.0018(11)  | 0.0104(11) |
| C18C | 0.0619(14) | 0.0578(14) | 0.0554(13) | 0.0223(11) | 0.0131(11)  | 0.0133(11) |
| C19C | 0.0469(12) | 0.0539(12) | 0.0532(13) | 0.0203(10) | 0.0071(10)  | 0.0122(10) |

Table S42. Hydrogen atomic coordinates and isotropic atomic displacement parameters ( $\text{\AA}^2$ ) for *syn-25*.

|      | x/a        | y/b       | z/c        | U(eq)    |
|------|------------|-----------|------------|----------|
| H01  | 0.1891(14) | -0.199(2) | 0.7084(19) | 0.070(9) |
| H201 | 0.2362     | -0.4380   | 0.7846     | 0.088    |
| H202 | 0.1711     | -0.3824   | 0.7312     | 0.088    |
| H301 | 0.1557     | -0.6165   | 0.6842     | 0.105    |
| H302 | 0.0677     | -0.5469   | 0.7203     | 0.105    |



## S73

|      |            |             |            |          |
|------|------------|-------------|------------|----------|
| H401 | 0.0399     | -0.5055     | 0.6007     | 0.1      |
| H402 | 0.0219     | -0.6376     | 0.5728     | 0.1      |
| H501 | 0.1208     | -0.5799     | 0.4857     | 0.087    |
| H502 | 0.1831     | -0.6460     | 0.5313     | 0.087    |
| H701 | 0.1493     | -0.3632     | 0.5854     | 0.083    |
| H702 | 0.2293     | -0.3631     | 0.5222     | 0.083    |
| H8A  | 0.3551     | -0.2381     | 0.6275     | 0.079    |
| H901 | 0.3566     | -0.2840     | 0.7672     | 0.086    |
| H902 | 0.4301     | -0.3272     | 0.6986     | 0.086    |
| H10A | 0.4211     | -0.4976     | 0.7300     | 0.082    |
| H10B | 0.3279     | -0.6009     | 0.6712     | 0.082    |
| H12A | 0.3225     | -0.5767     | 0.4814     | 0.093    |
| H12B | 0.3853     | -0.4501     | 0.5265     | 0.093    |
| H02  | 0.1754(14) | -0.0400(19) | 0.7809(16) | 0.050(7) |
| H15A | 0.4089     | 0.1515      | 0.8117     | 0.065    |
| H18A | 0.1148     | 0.3236      | 0.8637     | 0.072    |
| H19A | 0.0978     | 0.1304      | 0.8170     | 0.078    |
| H15D | 0.3782     | 0.1504      | 0.7927     | 0.078    |
| H18D | 0.0723     | 0.2831      | 0.8695     | 0.079    |
| H19D | 0.0787     | 0.0932      | 0.8285     | 0.074    |
| H03  | 0.2085(13) | 0.262(2)    | 0.3179(15) | 0.048(7) |
| H04  | 0.1564(13) | 0.125(2)    | 0.3514(17) | 0.058(7) |
| H211 | 0.2186     | 0.2458      | 0.1257     | 0.087    |
| H212 | 0.1494     | 0.2436      | 0.0413     | 0.087    |
| H311 | 0.3316     | 0.2632      | 0.0349     | 0.105    |
| H312 | 0.2849     | 0.3671      | 0.0278     | 0.105    |
| H411 | 0.4040     | 0.3687      | 0.1806     | 0.09     |
| H412 | 0.4474     | 0.4320      | 0.1251     | 0.09     |
| H511 | 0.3299     | 0.5540      | 0.1598     | 0.084    |
| H512 | 0.3949     | 0.5569      | 0.2461     | 0.084    |
| H711 | 0.2752     | 0.4987      | 0.3494     | 0.072    |
| H712 | 0.3018     | 0.3863      | 0.2830     | 0.072    |

## S74

|      |            |          |            |          |
|------|------------|----------|------------|----------|
| H8B  | 0.1044     | 0.4230   | 0.3304     | 0.066    |
| H911 | 0.0504     | 0.2651   | 0.1659     | 0.074    |
| H912 | 0.0156     | 0.3844   | 0.2005     | 0.074    |
| H10C | 0.1268     | 0.4712   | 0.0634     | 0.076    |
| H10D | 0.0207     | 0.4369   | 0.0922     | 0.076    |
| H12D | 0.1443     | 0.5807   | 0.3033     | 0.079    |
| H12C | 0.2388     | 0.6561   | 0.2866     | 0.079    |
| H10E | 0.1499     | 0.4305   | 0.0405     | 0.071    |
| H10F | 0.0330     | 0.3900   | 0.0524     | 0.071    |
| H12E | 0.1376     | 0.5951   | 0.2745     | 0.082    |
| H12F | 0.2295     | 0.6488   | 0.2406     | 0.082    |
| H15B | -0.0787    | 0.1550   | 0.4140     | 0.065    |
| H18B | 0.0135     | -0.1944  | 0.3647     | 0.078    |
| H19B | 0.1175     | -0.0646  | 0.3322     | 0.072    |
| H06  | 0.5263(16) | 0.091(2) | 0.3688(15) | 0.052(7) |
| H05  | 0.4569(15) | 0.060(2) | 0.2414(16) | 0.051(7) |
| H7C1 | 0.2805     | -0.1002  | 0.1902     | 0.078    |
| H7C2 | 0.1787     | -0.0426  | 0.1908     | 0.078    |
| H8C  | 0.2721     | 0.1187   | 0.2032     | 0.064    |
| H9C1 | 0.3165     | 0.0984   | 0.0790     | 0.067    |
| H9C2 | 0.4264     | 0.0699   | 0.1108     | 0.067    |
| H2C1 | 0.4557     | -0.1203  | 0.0118     | 0.092    |
| H2C2 | 0.4360     | -0.1160  | 0.1023     | 0.092    |
| H3C1 | 0.4250     | -0.3024  | 0.0126     | 0.119    |
| H3C2 | 0.3402     | -0.2921  | -0.0590    | 0.119    |
| H4C1 | 0.2498     | -0.3792  | 0.0196     | 0.13     |
| H4C2 | 0.3017     | -0.2756  | 0.1071     | 0.13     |
| H5C1 | 0.1295     | -0.2595  | 0.0662     | 0.117    |
| H5C2 | 0.1497     | -0.2708  | -0.0258    | 0.117    |
| H10G | 0.3101     | -0.0253  | -0.0660    | 0.076    |
| H10H | 0.2719     | -0.1575  | -0.0963    | 0.076    |
| H12G | 0.0567     | -0.1170  | 0.0176     | 0.092    |

|      |        |         |         |       |
|------|--------|---------|---------|-------|
| H12H | 0.1219 | 0.0080  | 0.0693  | 0.092 |
| H7F1 | 0.1665 | 0.0350  | 0.1500  | 0.075 |
| H7F2 | 0.2192 | -0.0292 | 0.2032  | 0.075 |
| H8F  | 0.3148 | 0.1584  | 0.1962  | 0.063 |
| H9F1 | 0.4024 | 0.1167  | 0.0904  | 0.065 |
| H9F2 | 0.4460 | 0.0196  | 0.1121  | 0.065 |
| H2F1 | 0.3993 | -0.0729 | -0.0578 | 0.102 |
| H2F2 | 0.2911 | -0.1606 | -0.0903 | 0.102 |
| H3F1 | 0.4643 | -0.1574 | 0.0335  | 0.134 |
| H3F2 | 0.4292 | -0.2499 | -0.0620 | 0.134 |
| H4F1 | 0.3628 | -0.3190 | 0.0366  | 0.094 |
| H4F2 | 0.2672 | -0.3155 | -0.0305 | 0.094 |
| H5F1 | 0.2289 | -0.2330 | 0.1072  | 0.104 |
| H5F2 | 0.3407 | -0.1517 | 0.1415  | 0.104 |
| H10I | 0.2095 | 0.0861  | 0.0319  | 0.081 |
| H10J | 0.2362 | 0.0232  | -0.0607 | 0.081 |
| H12I | 0.1235 | -0.2221 | -0.0283 | 0.068 |
| H12J | 0.0677 | -0.1444 | 0.0435  | 0.068 |
| H15C | 0.6466 | 0.1179  | 0.4872  | 0.064 |
| H18C | 0.3792 | 0.1882  | 0.6461  | 0.07  |
| H19C | 0.3449 | 0.1607  | 0.5019  | 0.062 |

Table S43. Hydrogen bond distances (Å) and angles (°) for *syn-25*.

|               | Donor-H   | Acceptor-H | Donor-Acceptor | Angle   |
|---------------|-----------|------------|----------------|---------|
| N1B-H03...O2C | 0.806(14) | 2.314(17)  | 3.040(3)       | 150.(2) |
| N2B-H04...O2C | 0.803(14) | 2.029(16)  | 2.796(2)       | 160.(3) |
| N1A-H01...O2B | 0.803(14) | 2.107(17)  | 2.867(3)       | 158.(3) |
| N2A-H02...O1C | 0.800(14) | 2.33(2)    | 2.932(4)       | 133.(2) |
| N1C-H05...O2A | 0.802(13) | 2.201(17)  | 2.928(3)       | 151.(2) |
| N2C-H06...O2A | 0.800(14) | 2.126(16)  | 2.894(2)       | 161.(2) |

**3.7. References for X-ray crystallography**

- (1) Hooft, R. W. W., Nonius B. V. *COLLECT, Program for Collecting Data on CCD Area Detectors*, **1998**, Delft, The Netherlands.
- (2) Otwinowski, Z.; Minor, W. *Methods Enzymol.* **1997**, 276, 307 – 326.
- (3) Otwinowski, Z.; Borek, D.; Majewski, W.; Minor, W. *Acta Crystallogr. Sect. A* **2003**, 59, 228 – 234.
- (4) Sheldrick, G. M. *SHELXT – Integrated space-group and crystal-structure determination, Acta Cryst.*, **2015**, A71, 3-8.
- (5) Sheldrick, G.M. *Crystal structure refinement with SHELXL, Acta Cryst.*, **2015**, C71 (1), 3-8.
- (6) *XP – Interactive molecular graphics, Version 5.1*, Bruker AXS Inc., Madison, Wisconsin, USA, **1998**.

#### 4. Molecular Dynamics study to determine the binding mode of **18**

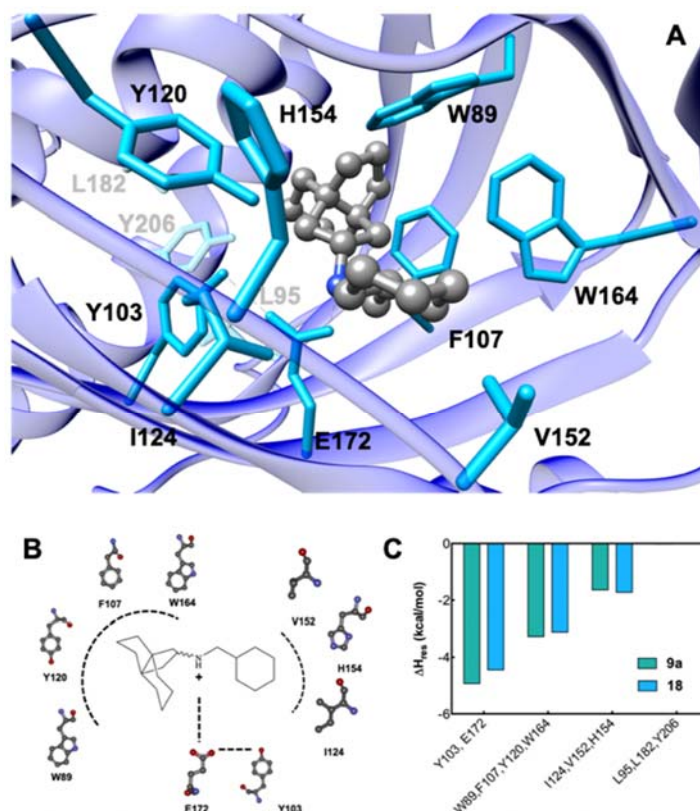

Figure S1. (A) Details of an equilibrated MD snapshot of **18** in the binding pocket of the  $\sigma_1$  receptor. The compounds are shown as atom-colored sticks-and-balls (C, grey, N, blue, O, red) while the side chains of  $\sigma_1$  residues mainly interacting with the ligands are depicted as colored sticks and labeled. Hydrogen atoms, water molecules, ions, and counter ions are omitted for clarity. (B) 2D schematic representation of the general stabilizing interactions between **18** and  $\sigma_1$  receptor (C) Per-residue binding free energy decomposition ( $\Delta H_{res}$ ) of the main involved amino acids in  $\sigma_1/9a$  (light sea green) and  $\sigma_1/18$  (deep sky blue) complexes.

## 5. NMR spectra

NOESY spectrum (crucial part of oxocarbamate *syn-7*).

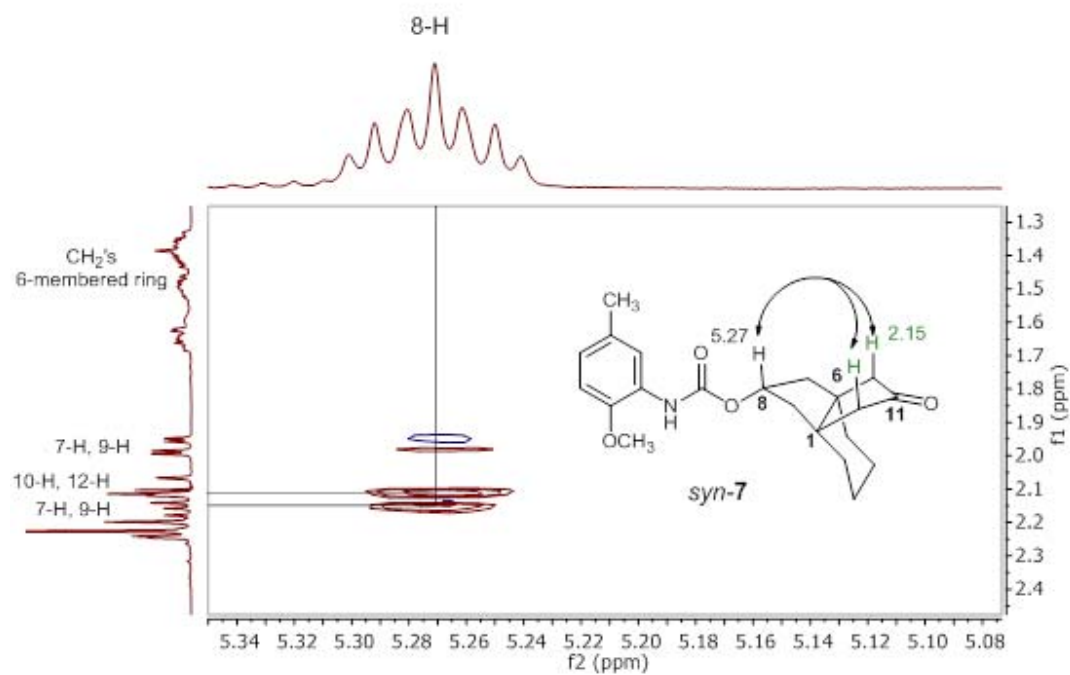

NOESY spectrum (crucial part of oxocarbamate *anti-7*).

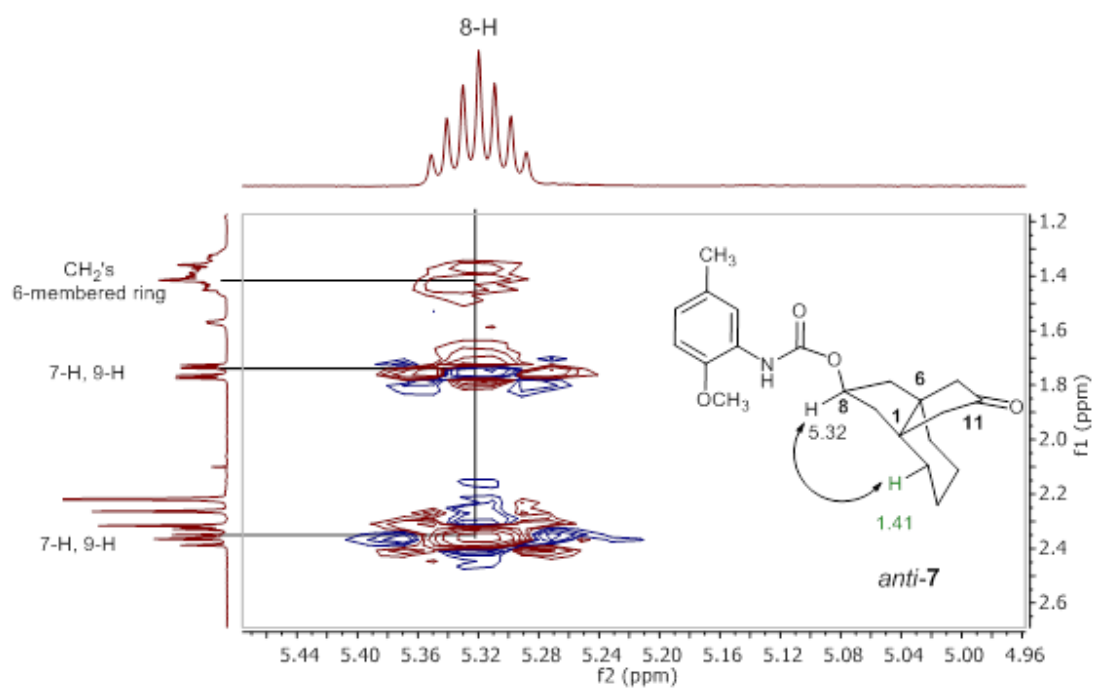

NOESY spectrum (crucial part of benzylaminocarbamate *anti,anti*-4a).

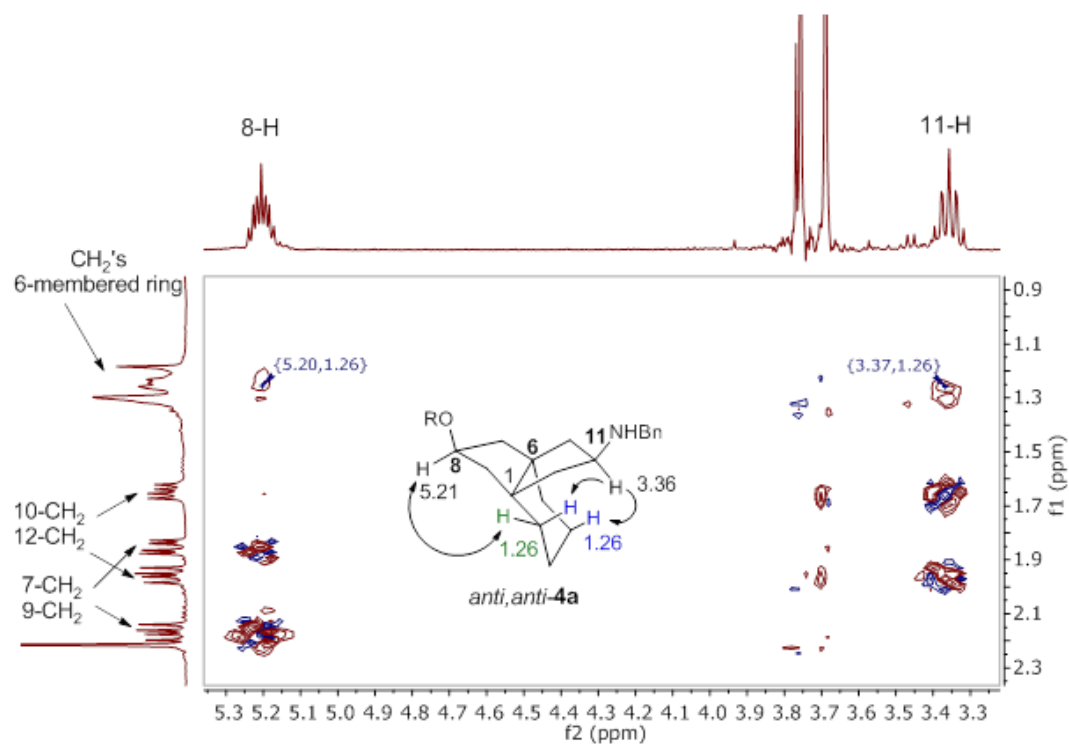

NOESY spectrum (crucial part of benzylaminocarbamate *anti,syn*-4a).

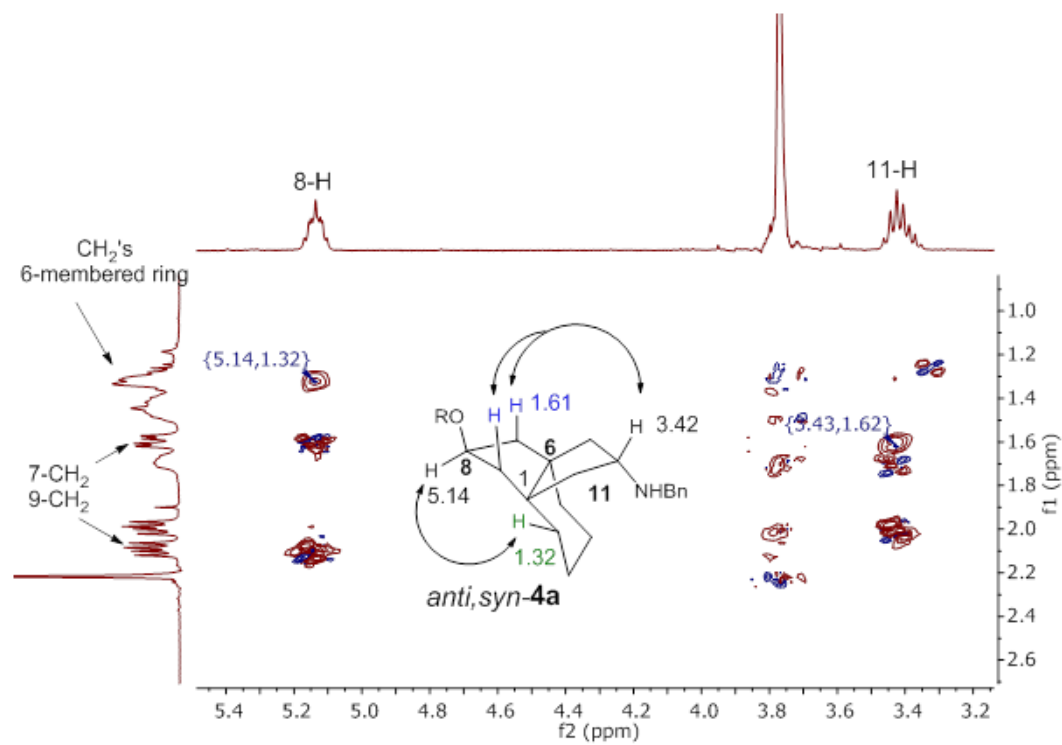

NOESY spectrum (crucial part of benzylaminocarbamate *syn,syn*-4a).

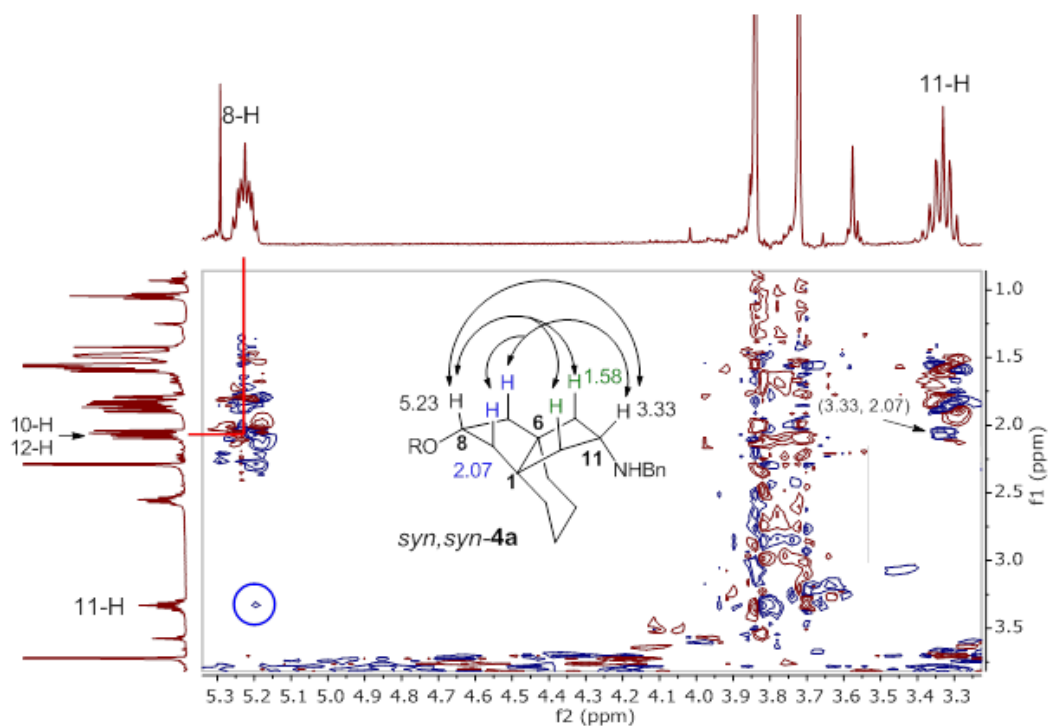

NOESY spectrum (crucial part of benzylaminocarbamate *syn,anti*-4a).

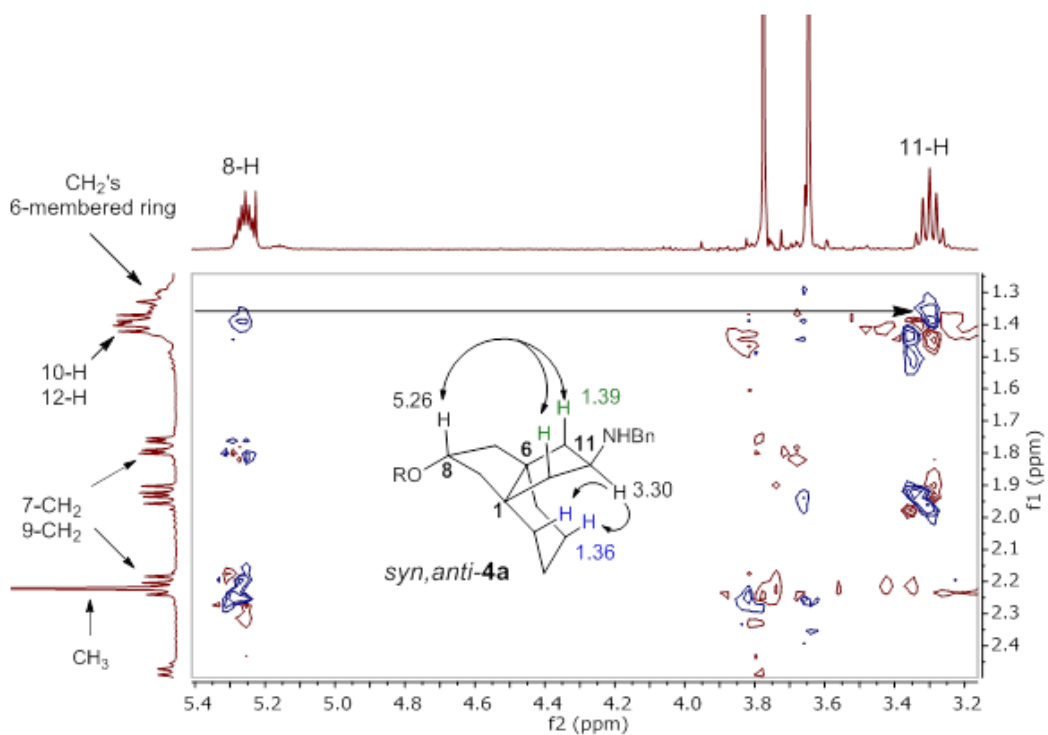



$^1\text{H}$  NMR spectrum of [(8-*anti*-11-*anti* and 8-*anti*-11-*syn*)-11-(3,4-Dimethoxybenzylamino)[4.3.3]propellan-8-yl] N-(2-methoxy-5-methylphenyl)carbamate (8-*anti*-4b)

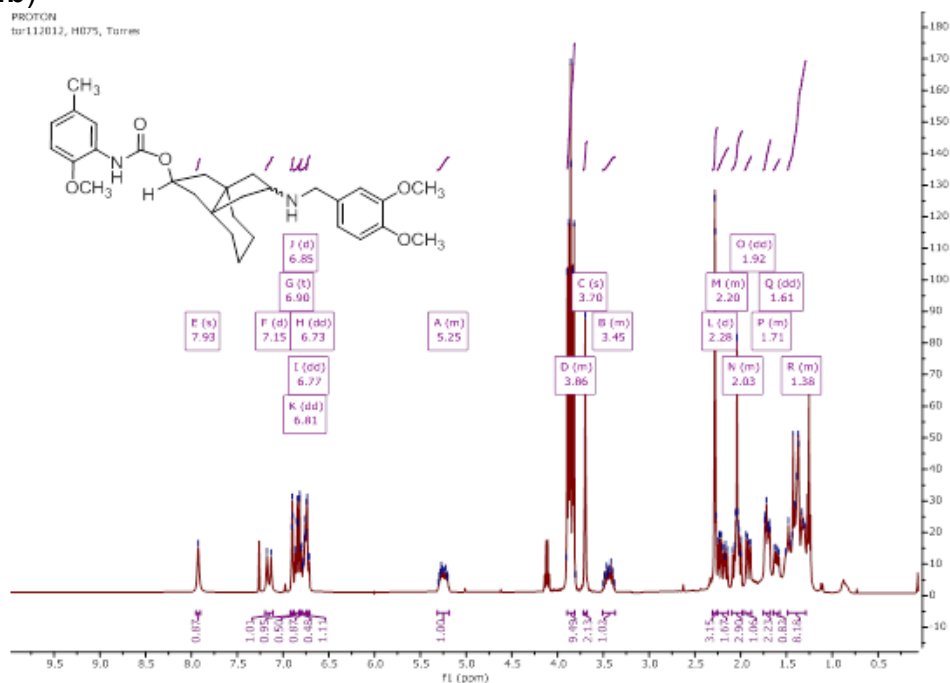

HSQC NMR spectrum of [(8-*anti*-11-*anti* and 8-*anti*-11-*syn*)-11-(3,4-Dimethoxybenzylamino)[4.3.3]propellan-8-yl] N-(2-methoxy-5-methylphenyl)carbamate (8-*anti*-4b)

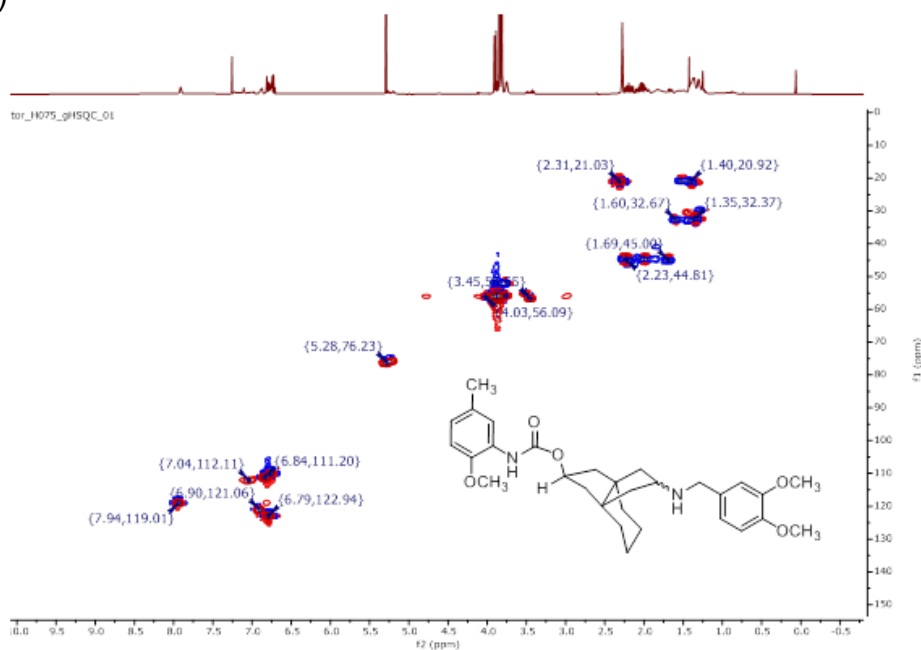

$^1\text{H}$  NMR spectrum of [(8-*anti*-11-*anti* and 8-*anti*-11-*syn*)-11-(4-Chlorobenzylamino)[4.3.3]propellan-8-yl] N-(2-methoxy-5-methylphenyl)carbamate (8-*anti*-4c)

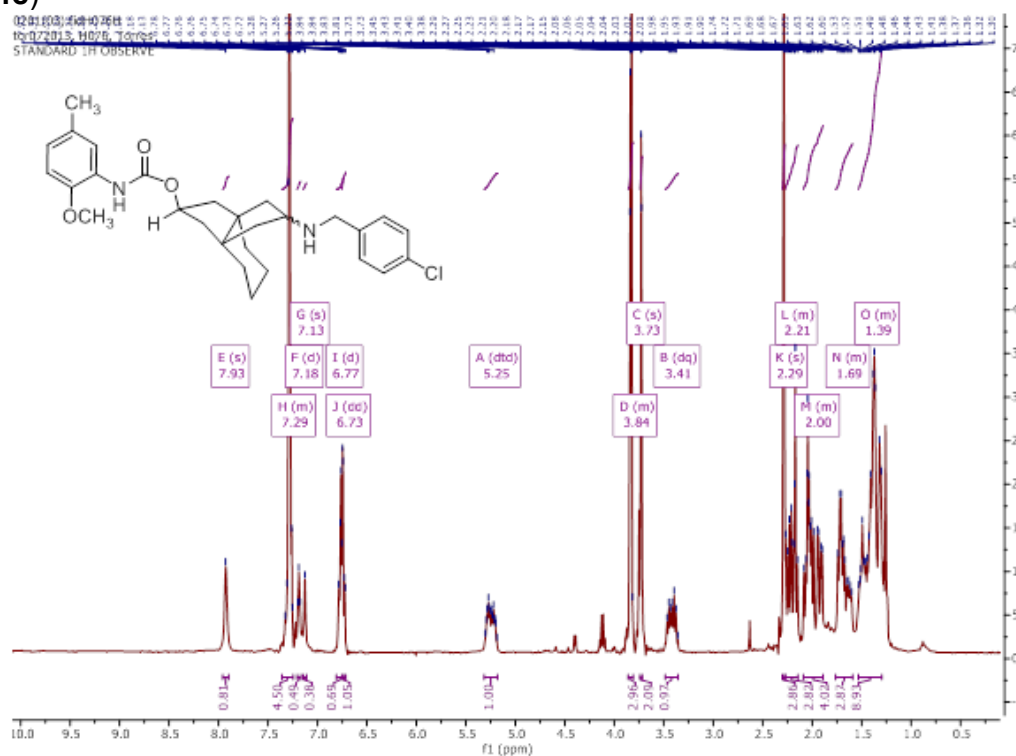

$^{13}\text{C}$  NMR spectrum of [(8-*anti*-11-*anti* and 8-*anti*-11-*syn*)-11-(4-Chlorobenzylamino)[4.3.3]propellan-8-yl] N-(2-methoxy-5-methylphenyl)carbamate (8-*anti*-4c)

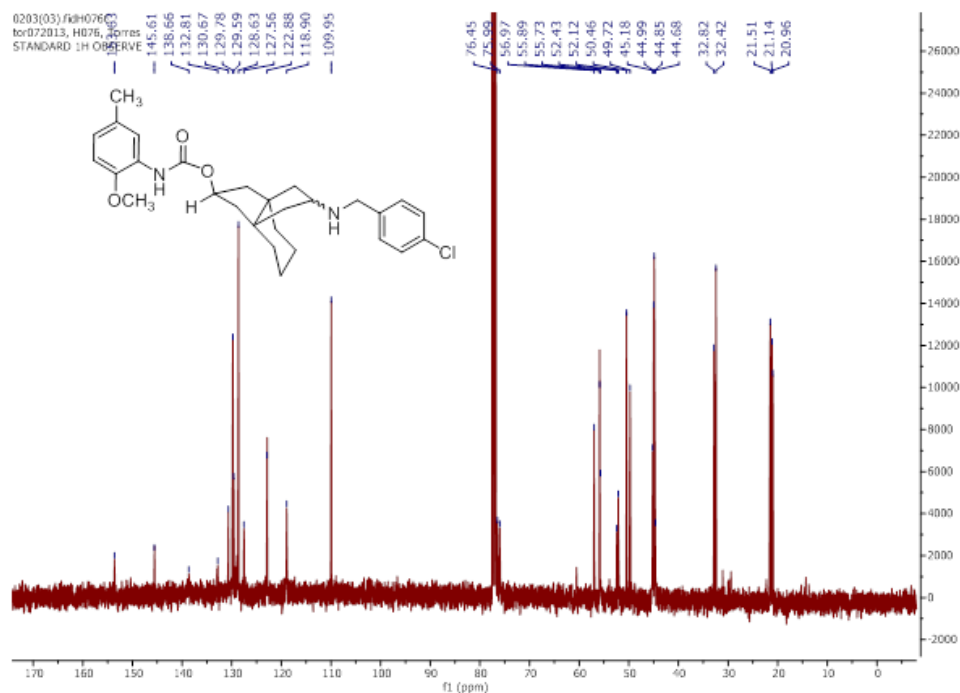

$^1\text{H}$  NMR spectrum of [(8-*anti*-11-*anti* and 8-*anti*-11-*syn*)-11-(3,4-Dichlorobenzylamino)[4.3.3]propellan-8-yl] N-(2-methoxy-5-methylphenyl)carbamate (8-*anti*-4d)

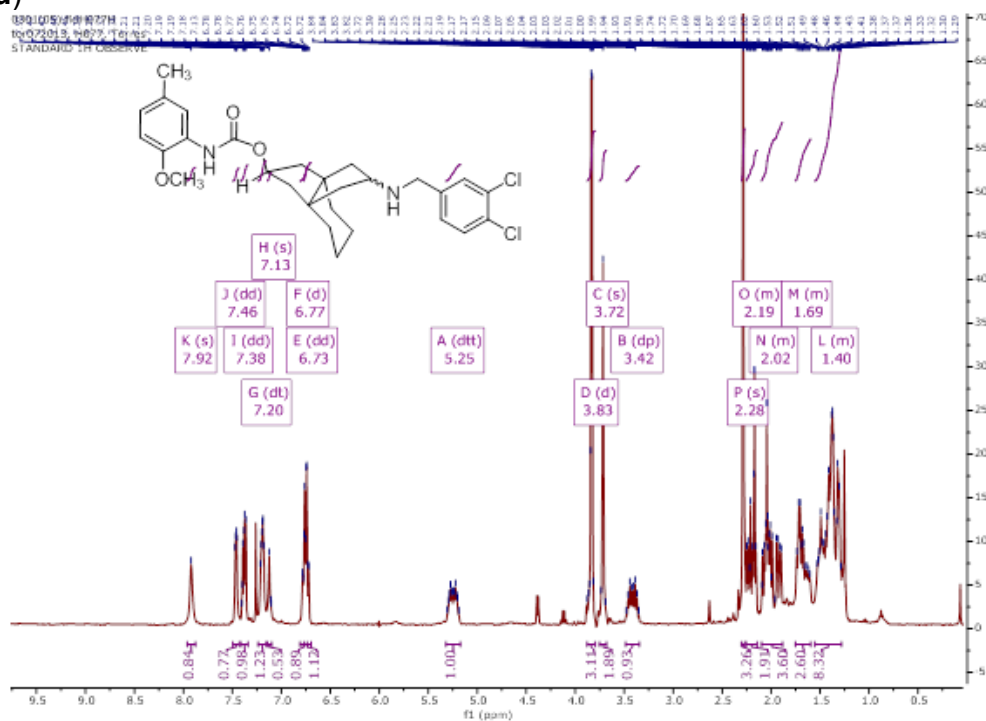

$^{13}\text{C}$  NMR spectrum of [(8-*anti*-11-*anti* and 8-*anti*-11-*syn*)-11-(3,4-Dichlorobenzylamino)[4.3.3]propellan-8-yl] N-(2-methoxy-5-methylphenyl)carbamate (8-*anti*-4d)

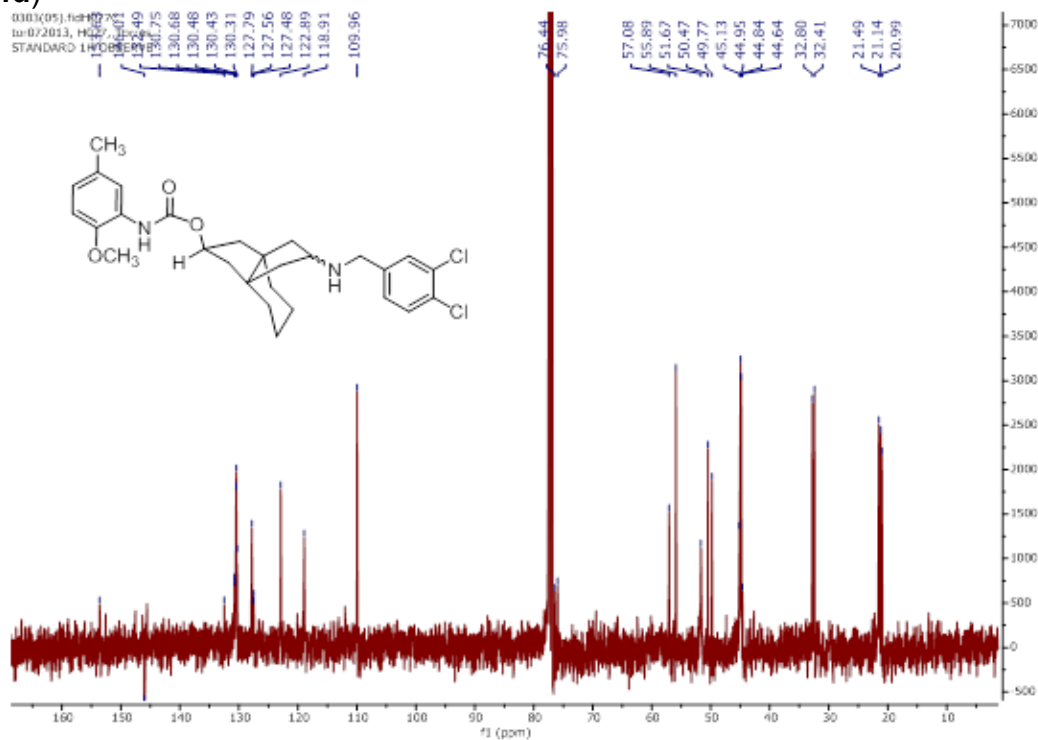

$^1\text{H}$  NMR spectrum of [(8-*anti*-11-*anti* and 8-*anti*-11-*syn*)-11-(2,4-Dimethylbenzylamino)[4.3.3]propellan-8-yl] N-(2-methoxy-5-methylphenyl)carbamate (8-*anti*-4e)

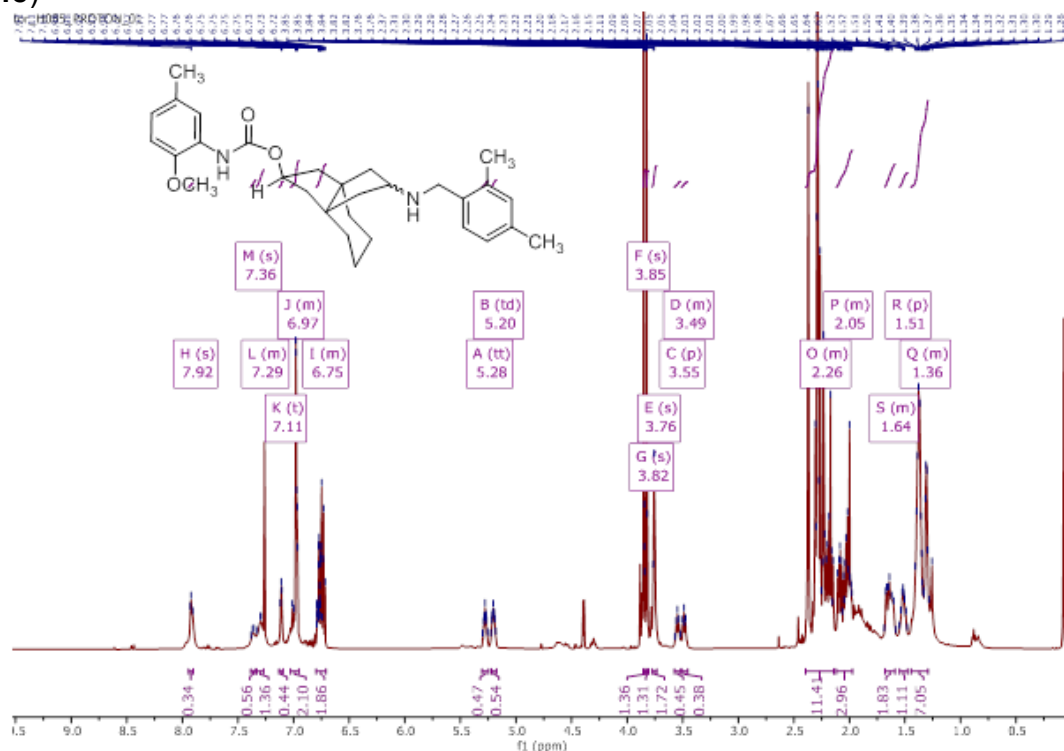

$^{13}\text{C}$  NMR spectrum of [(8-*anti*-11-*anti* and 8-*anti*-11-*syn*)-11-(2,4-Dimethylbenzylamino)[4.3.3]propellan-8-yl] N-(2-methoxy-5-methylphenyl)carbamate (8-*anti*-4e)

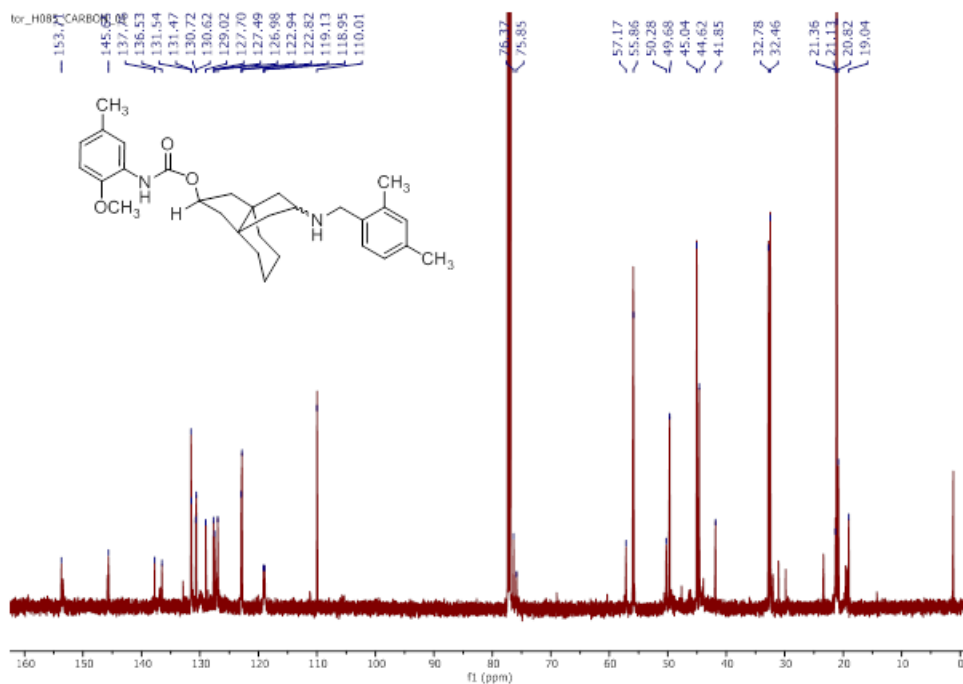

$^1\text{H}$  NMR spectrum of [(8-*anti*-11-*anti* and 8-*anti*-11-*syn*)-11-[(3,5-Bis(trifluoromethyl)benzylamino)[4.3.3]propellan-8-yl]N-(2-methoxy-5-methylphenyl)carbamate (8-*anti*-4f)

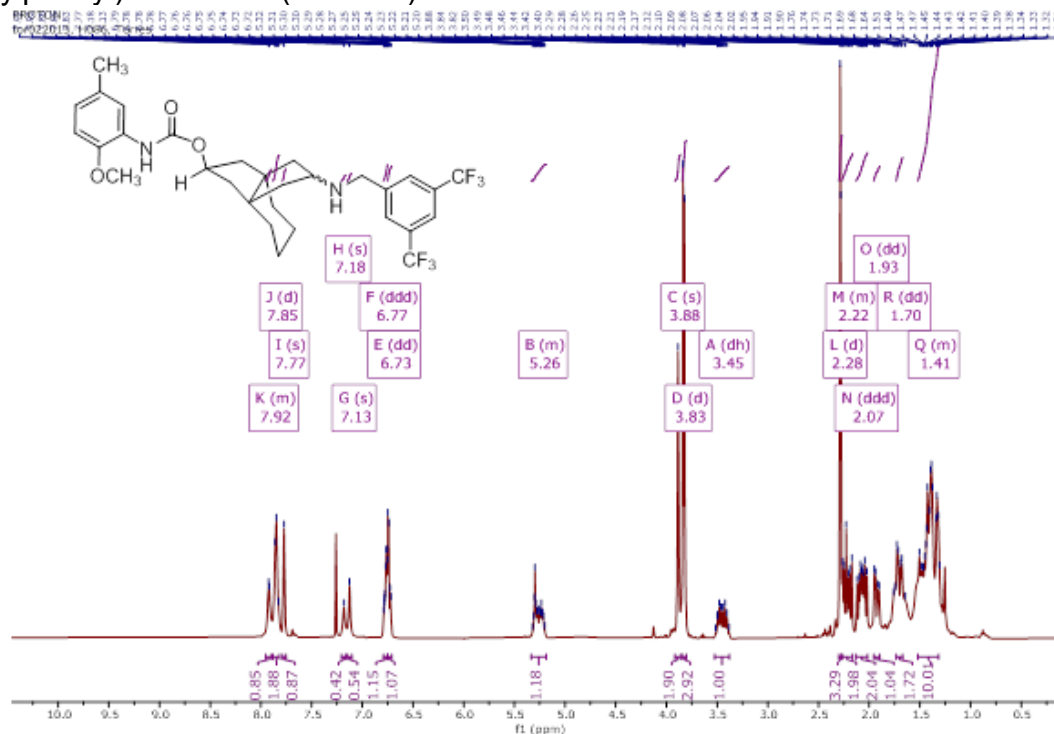

$^{13}\text{C}$  NMR spectrum of [(8-*anti*-11-*anti* and 8-*anti*-11-*syn*)-11-[(3,5-Bis(trifluoromethyl)benzylamino)[4.3.3]propellan-8-yl]N-(2-methoxy-5-methylphenyl)carbamate (8-*anti*-4f)

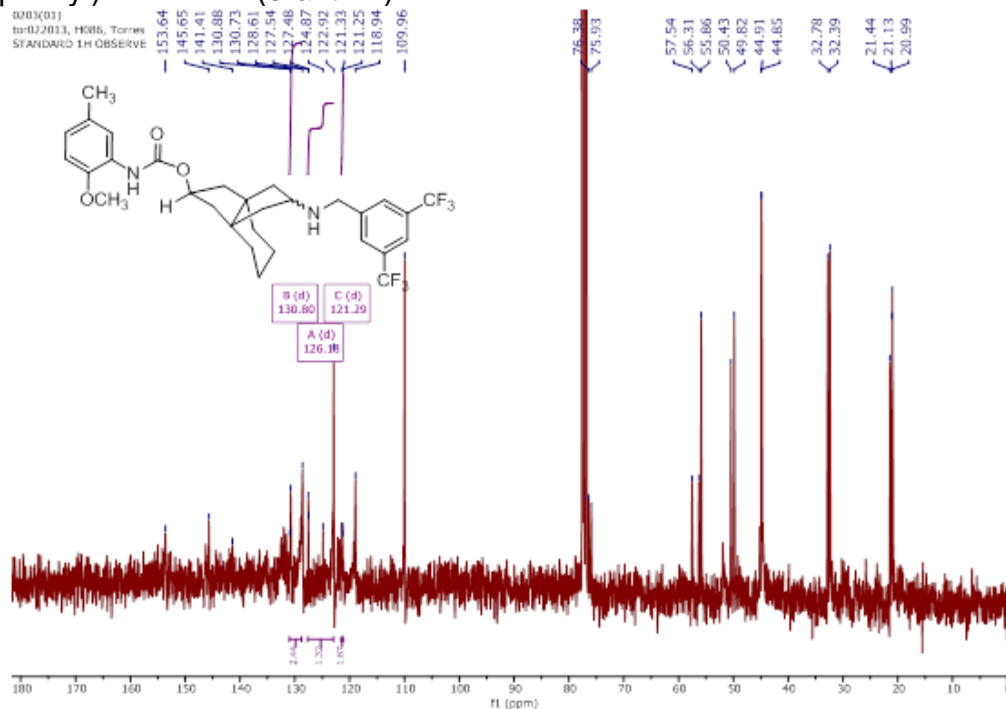

HSQC NMR spectrum of [(8-*anti*-11-*anti* and 8-*anti*-11-*syn*)-11-[(3,5-Bis(trifluoromethyl)benzylamino)[4.3.3]propellan-8-yl] N-(2-methoxy-5-methylphenyl)carbamate (8-*anti*-4f)

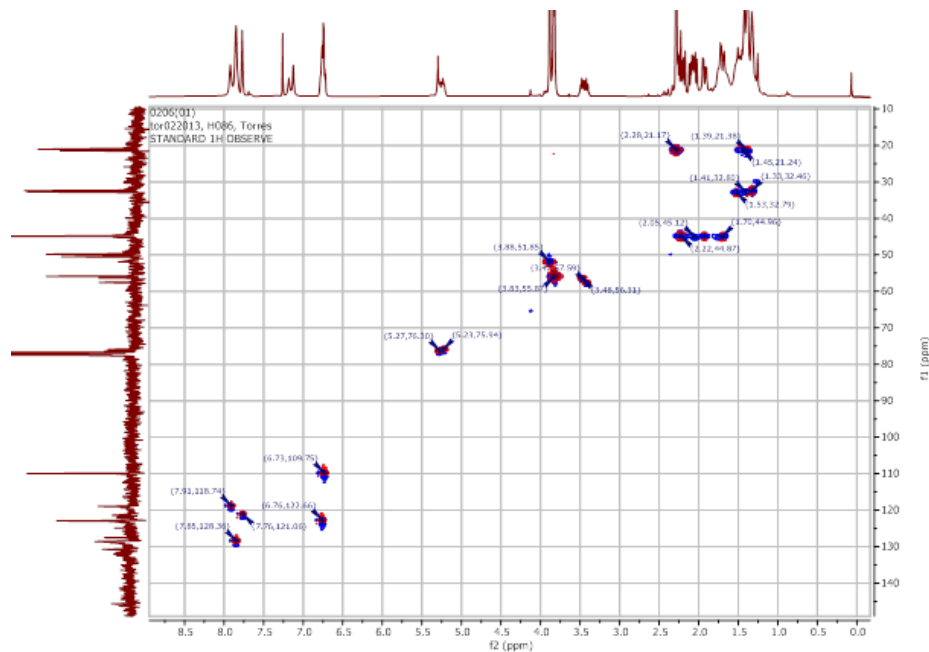

$^1\text{H}$  NMR spectrum of [(8-*anti*-11-*anti* and 8-*anti*-11-*syn*)-11-(4-Nitrobenzylamino)[4.3.3]propellan-8-yl] N-(2-methoxy-5-methylphenyl)carbamate (8-*anti*-4g)

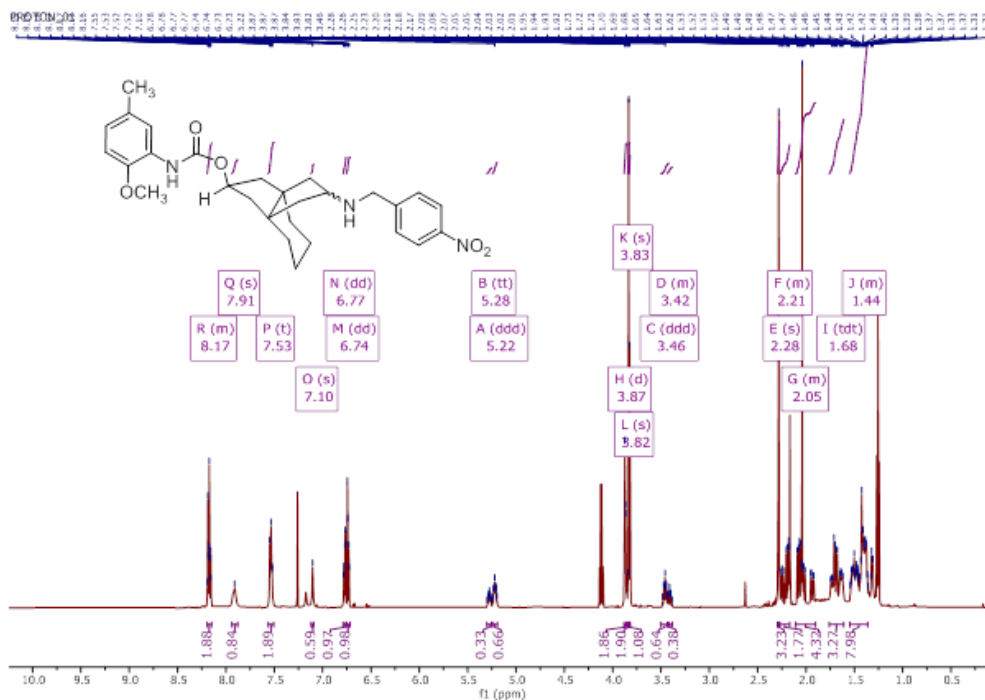

$^{13}\text{C}$  NMR spectrum of [(8-*anti*-11-*anti* and 8-*anti*-11-*syn*)-11-(4-Nitrobenzylamino)[4.3.3]propellane-8-yl] N-(2-methoxy-5-methylphenyl)carbamate (8-*anti*-4g)

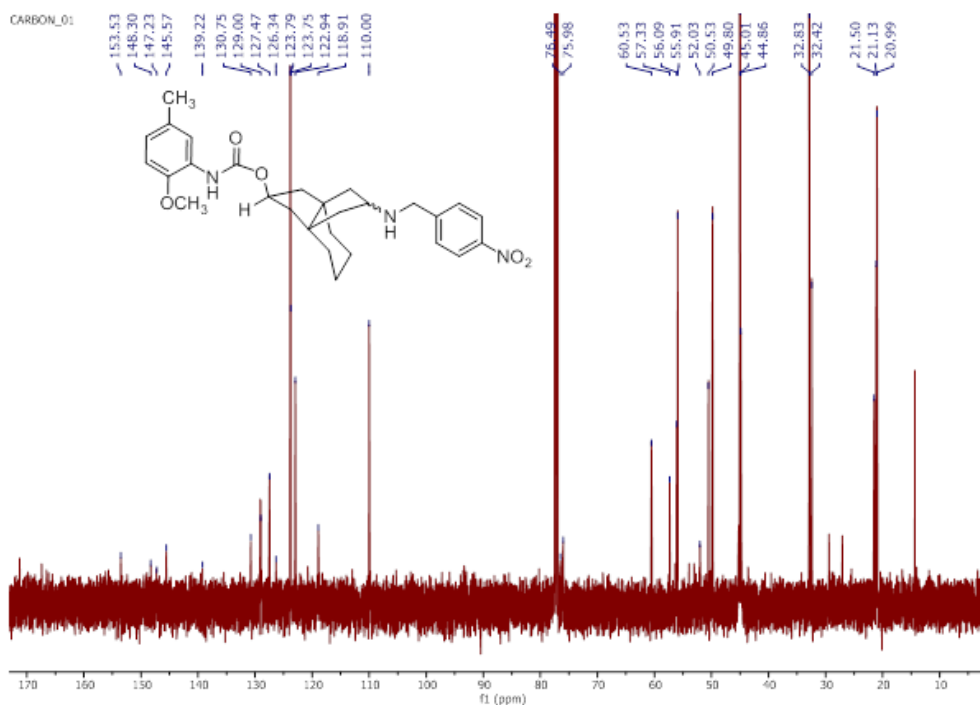

HSQC NMR spectrum of [(8-*anti*-11-*anti* and 8-*anti*-11-*syn*)-11-(4-Nitrobenzylamino)[4.3.3]propellane-8-yl] N-(2-methoxy-5-methylphenyl)carbamate (8-*anti*-4g)

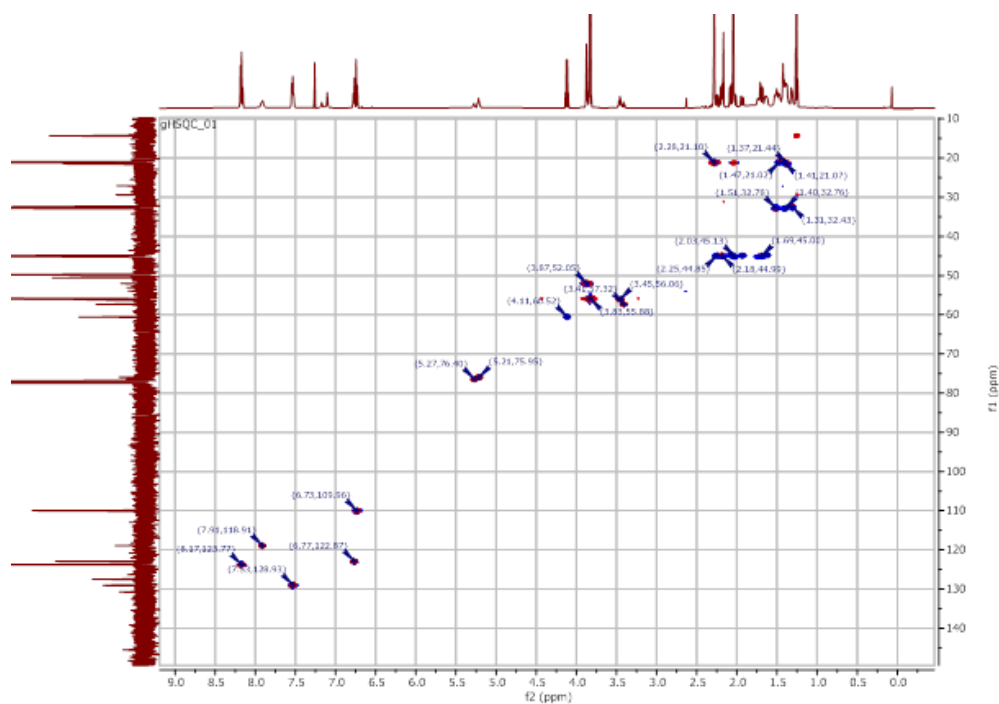

$^1\text{H}$  NMR spectrum of [(8-*anti*-11-*anti* and 8-*anti*-11-*syn*)-11-[(4-Dimethylamino)benzylamino][4.3.3]propellan-8-yl] N-(2-methoxy-5-methylphenyl)carbamate (8-*anti*-4h)

for\_H099\_PROTON\_01

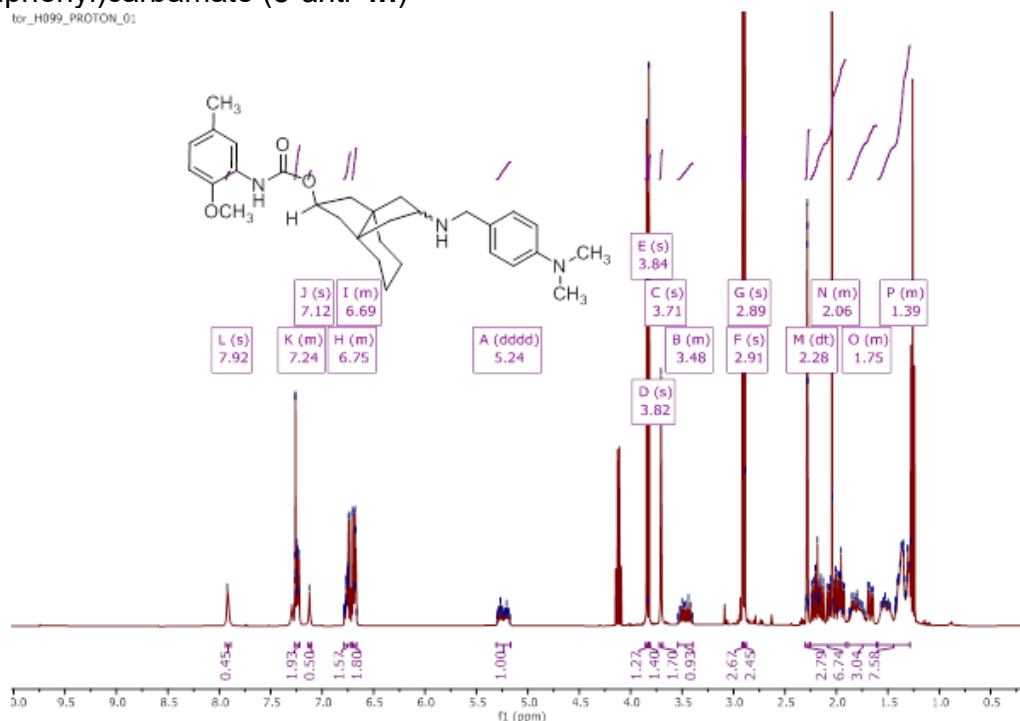

$^{13}\text{C}$  NMR spectrum of [(8-*anti*-11-*anti* and 8-*anti*-11-*syn*)-11-[(4-Dimethylamino)benzylamino][4.3.3]propellan-8-yl] N-(2-methoxy-5-methylphenyl)carbamate (8-*anti*-4h)

for\_H099\_CARBO\_01

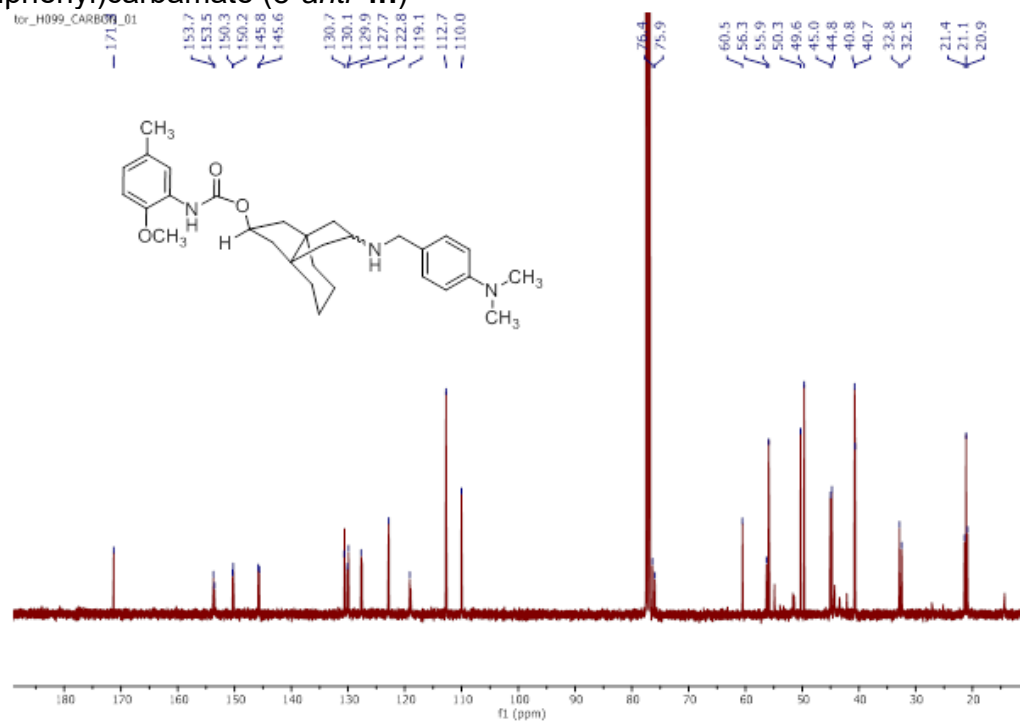



$^1\text{H}$  NMR spectrum of [(8-*anti*-11-*anti* and 8-*anti*-11-*syn*)-11-[(Furan-2-yl-methyl)amino][4.3.3]propellan-8-yl] N-(2-methoxy-5-methylphenyl)carbamate (8-*anti*-4i)

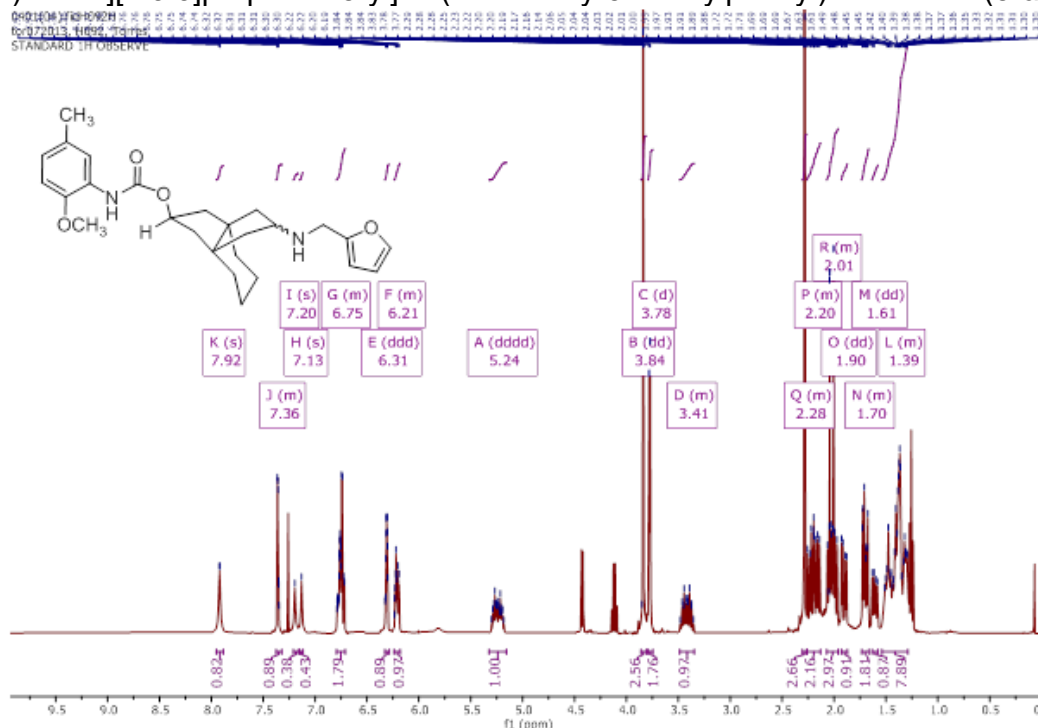

$^{13}\text{C}$  NMR spectrum of [(8-*anti*-11-*anti* and 8-*anti*-11-*syn*)-11-[(Furan-2-yl-methyl)amino][4.3.3]propellan-8-yl] N-(2-methoxy-5-methylphenyl)carbamate (8-*anti*-4i)

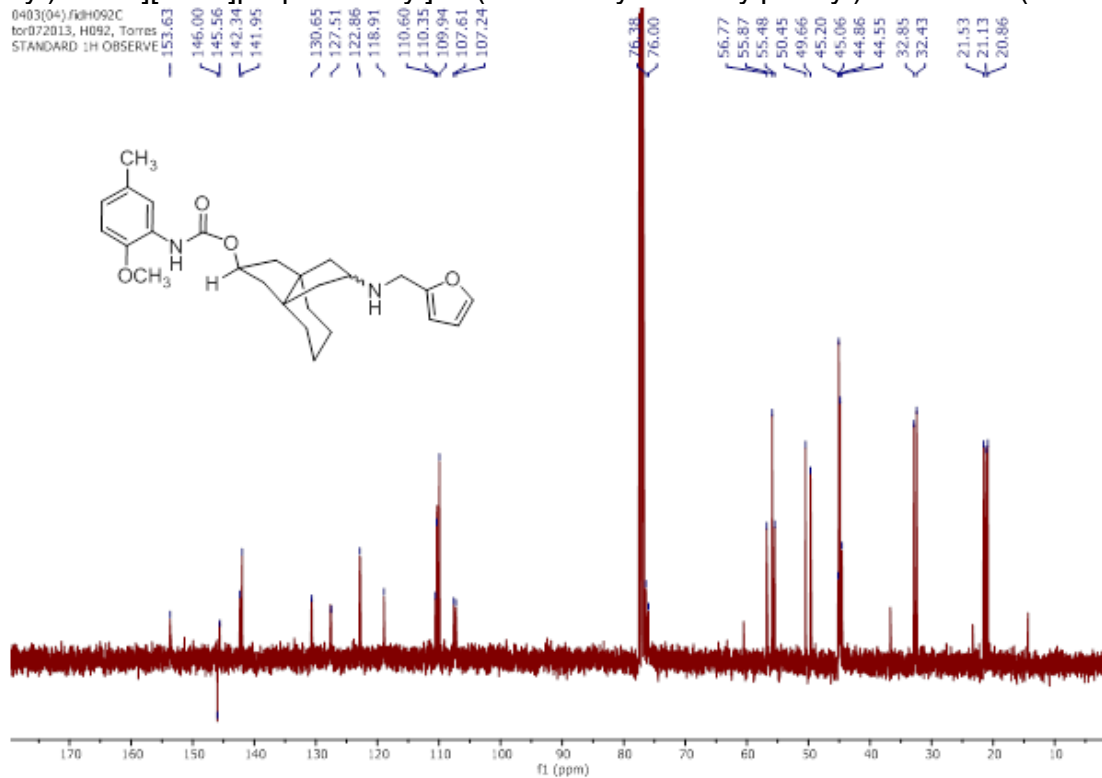

$^1\text{H}$  NMR spectrum of 8-*anti*-4i showing the diastereoisomeric ratio based on the integrals for protons at 8- and 11-positions.

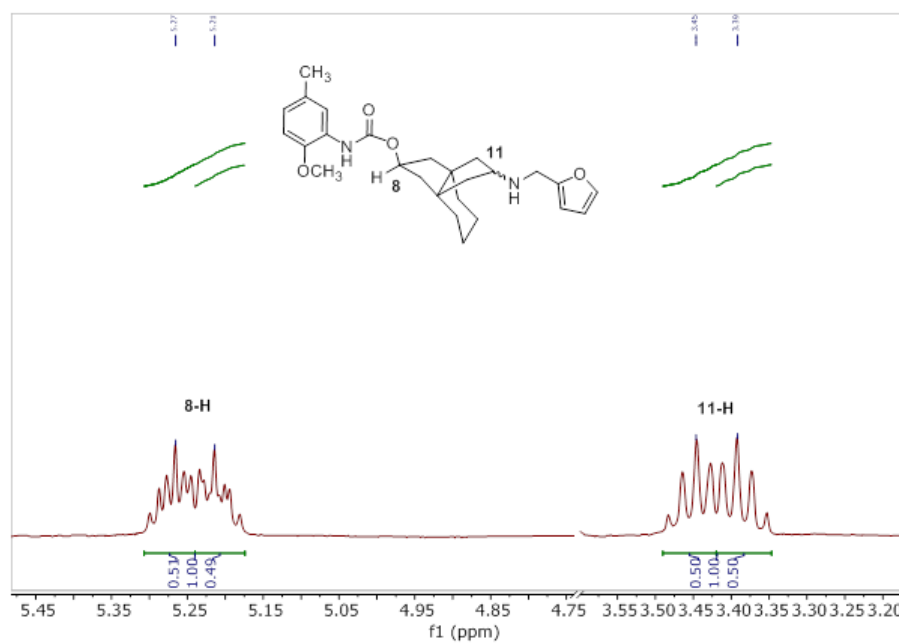

$^1\text{H}$  NMR spectrum of [(8-*syn*-11-*syn* and 8-*syn*-11-*anti*)-11-[(Furan-2-yl-methyl)amino][4.3.3]propellan-8-yl] N-(2-methoxy-5-methylphenyl)carbamate (8-*syn*-4i)

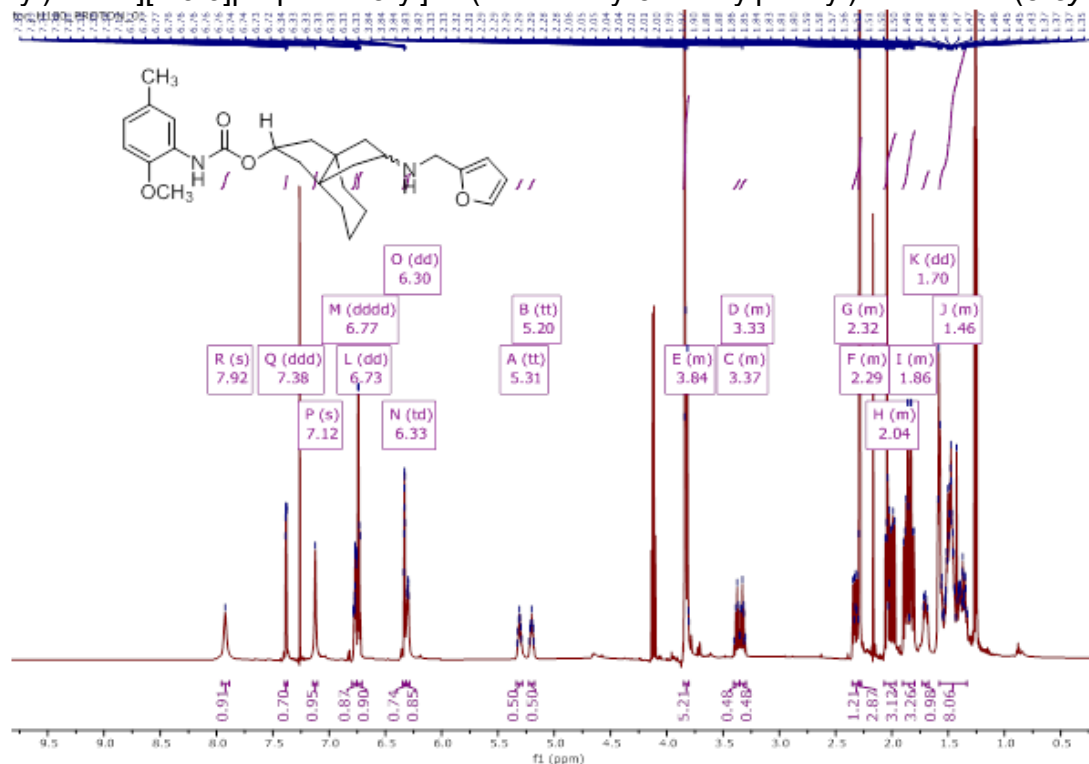

$^{13}\text{C}$  NMR spectrum of [(8-*syn*-11-*syn* and 8-*syn*-11-*anti*)-11-[(Furan-2-yl-methyl)amino][4.3.3]propellan-8-yl] N-(2-methoxy-5-methylphenyl)carbamate (8-*syn*-4i)

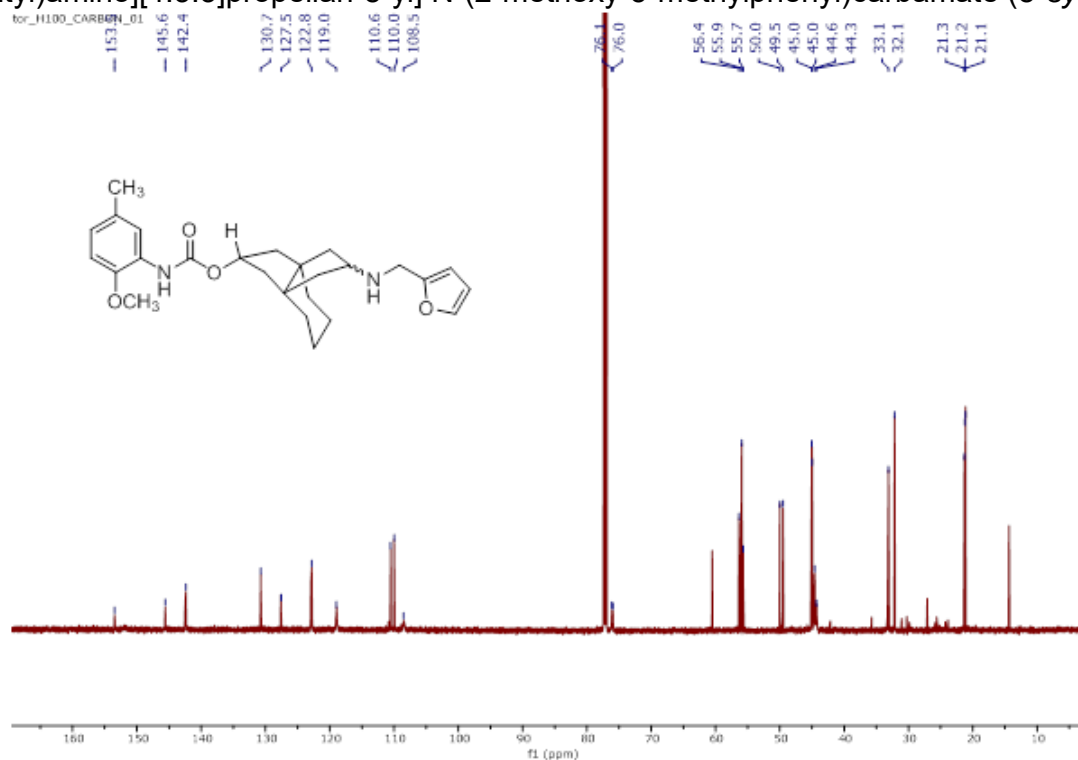

$^1\text{H}$  NMR spectrum of 8-*syn*-**4i** showing the diastereoisomeric ratio based on the integrals for protons at 8- and 11-positions.

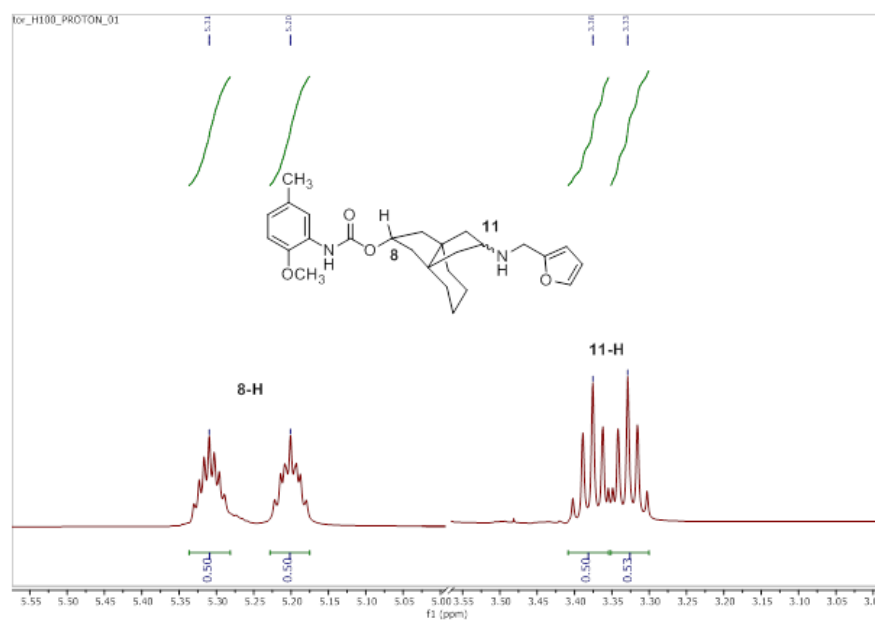

$^1\text{H}$  NMR spectrum of [(8-*anti*-11-*anti* and 8-*anti*-11-*syn*)-11-[2-(Indol-3-yl)ethylamino][4.3.3]propellan-8-yl] N-(2-methoxy-5-methylphenyl)carbamate (8-*anti*-4k)

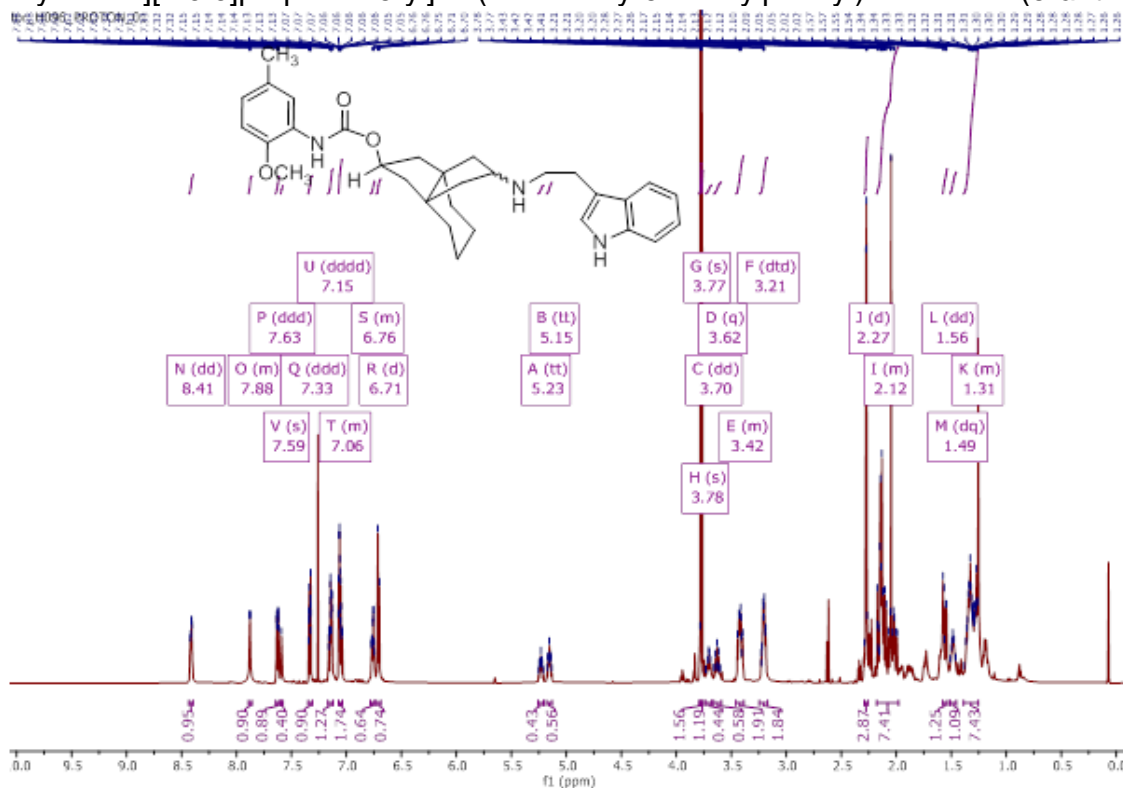

$^{13}\text{C}$  NMR spectrum of [(8-*anti*-11-*anti* and 8-*anti*-11-*syn*)-11-[2-(Indol-3-yl)ethylamino][4.3.3]propellan-8-yl] N-(2-methoxy-5-methylphenyl)carbamate (8-*anti*-4k)

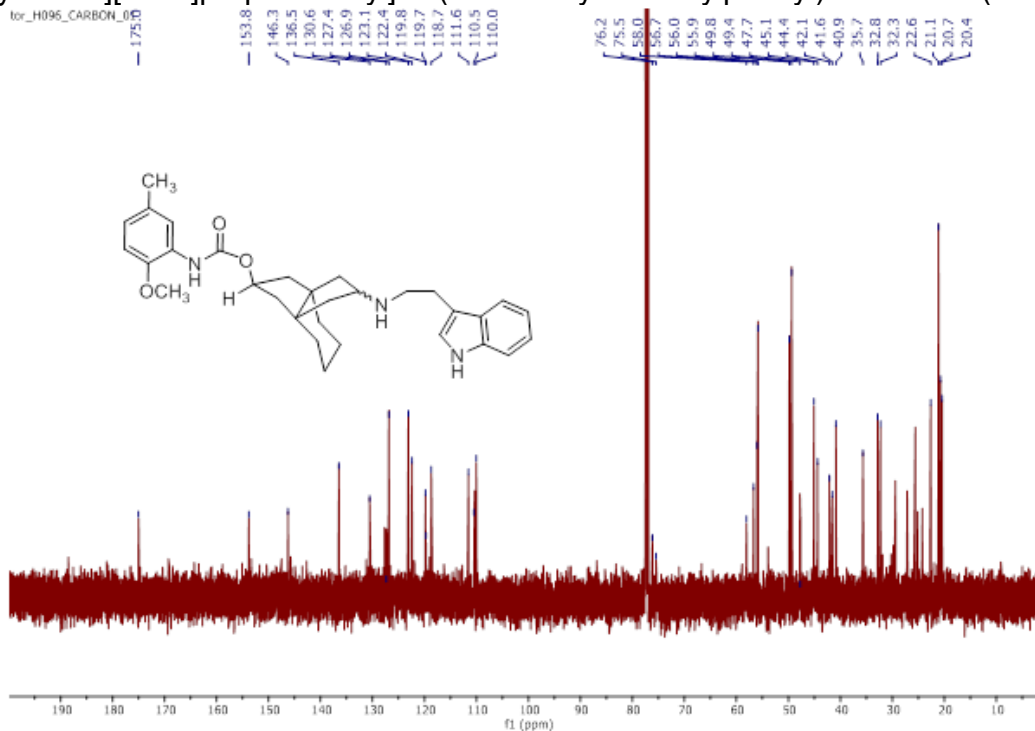

$^1\text{H}$  NMR spectrum of 8-*anti*-**4k** showing the diastereoisomeric ratio based on the integrals for protons at 8- and 11-positions.

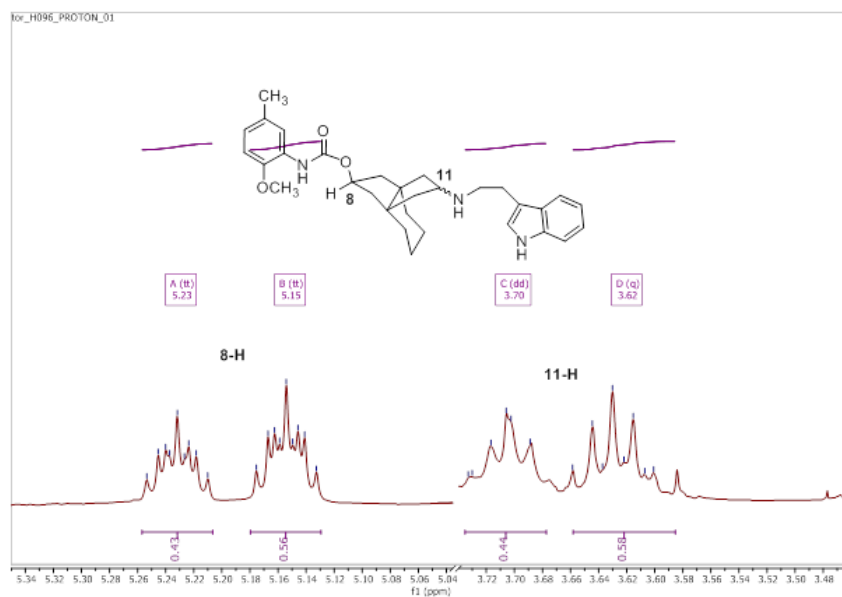

$^1\text{H}$  NMR spectrum of [(8-*syn*-11-*syn* and 8-*syn*-11-*anti*)-11-[(2-(Indol-3-yl)ethylamino)][4.3.3]propellane-8-yl] N-(2-methoxy-5-methylphenyl)carbamate (8-*syn*-4k)

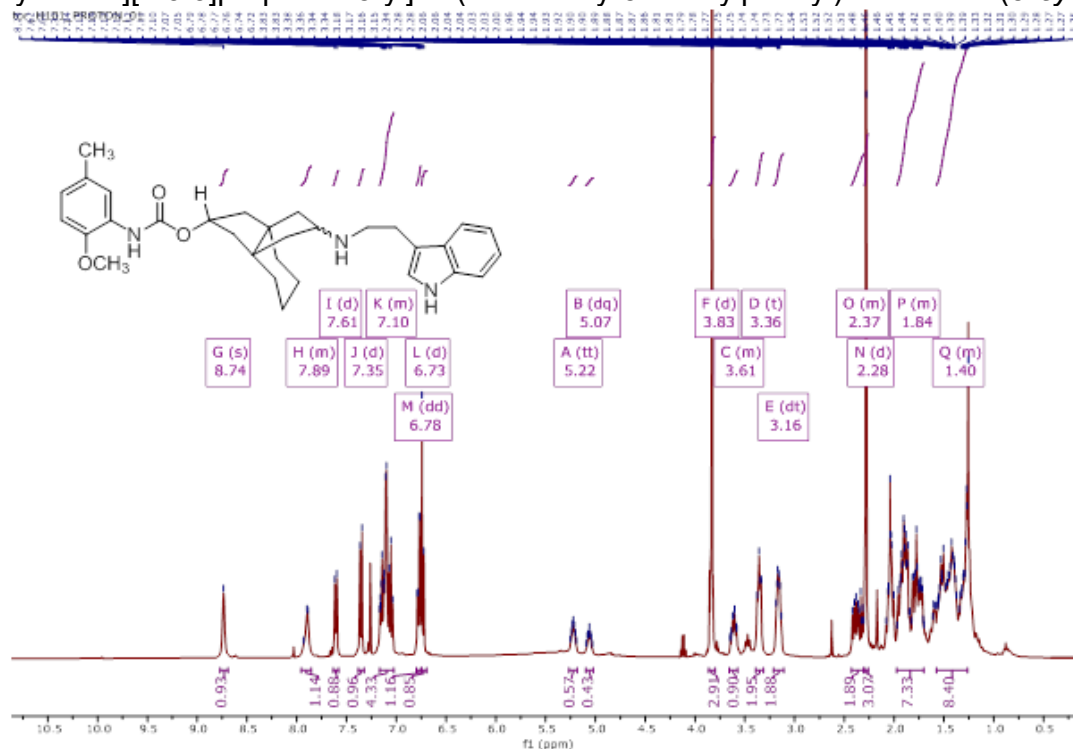

$^{13}\text{C}$  NMR spectrum of [(8-*syn*-11-*syn* and 8-*syn*-11-*anti*)-11-[(2-(Indol-3-yl)ethylamino)][4.3.3]propellane-8-yl] N-(2-methoxy-5-methylphenyl)carbamate (8-*syn*-4k)

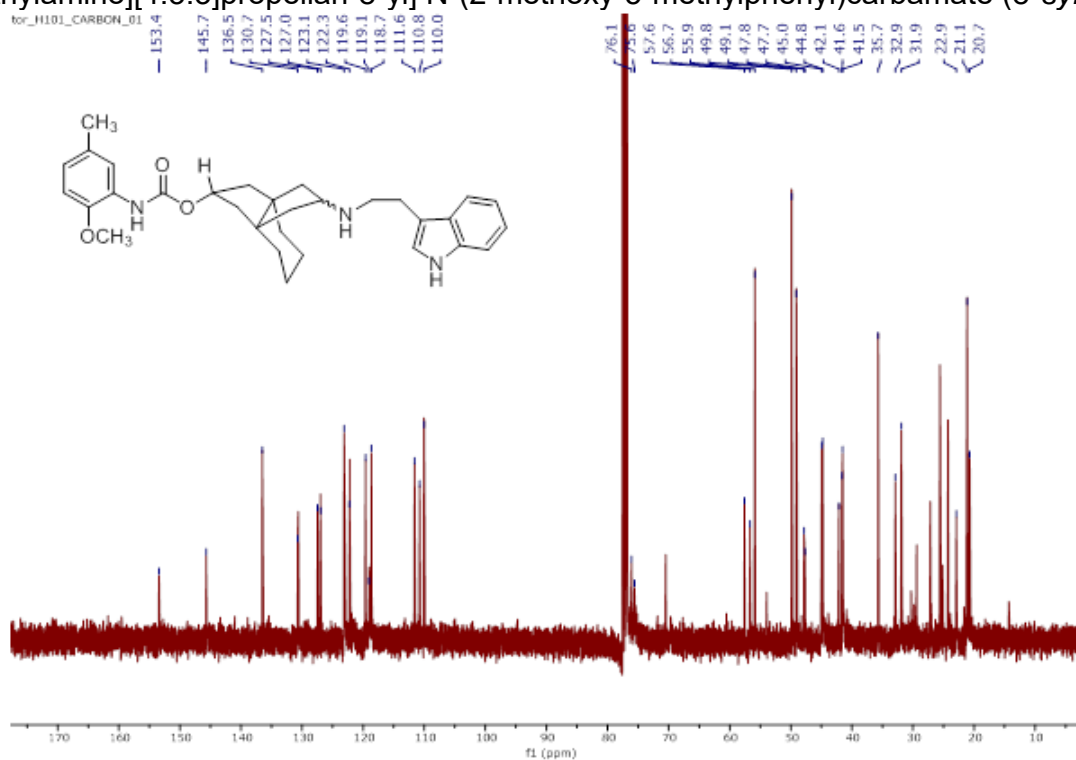

$^1\text{H}$  NMR spectrum of 8-*syn*-**4k** showing the diastereoisomeric ratio based on the integrals for protons at 8- and 11-positions. In this case protons at 11-H position for both *anti* and *syn* isomers are overlapping.

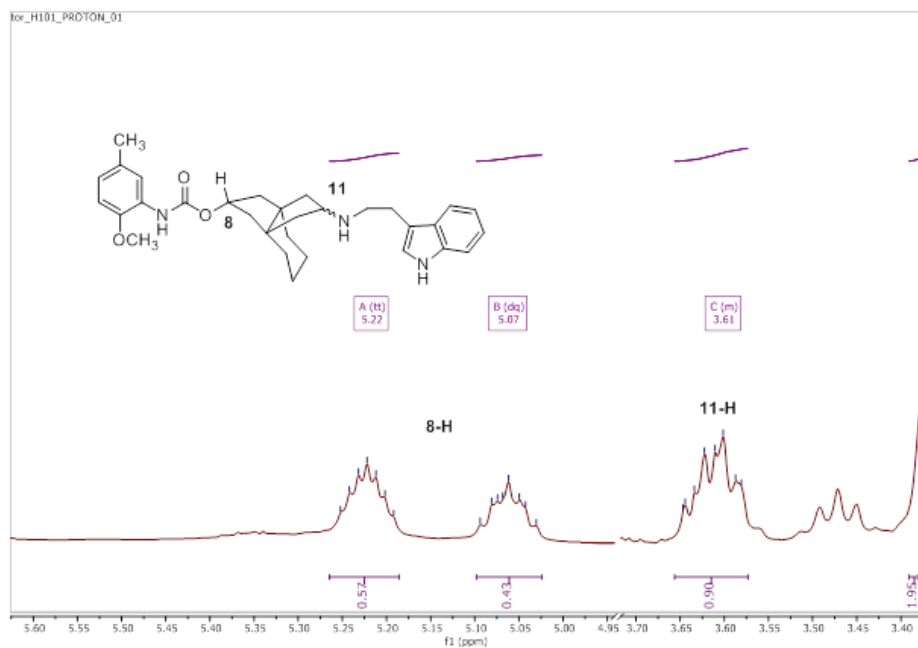



$^1\text{H}$  NMR spectrum of [(8-*anti*-11-*anti* and 8-*anti*-11-*syn*)-11-(Phenylamino)[4.3.3]propellan-8-yl] N-(2-methoxy-5-methylphenyl)carbamate (8-*anti*-4I)

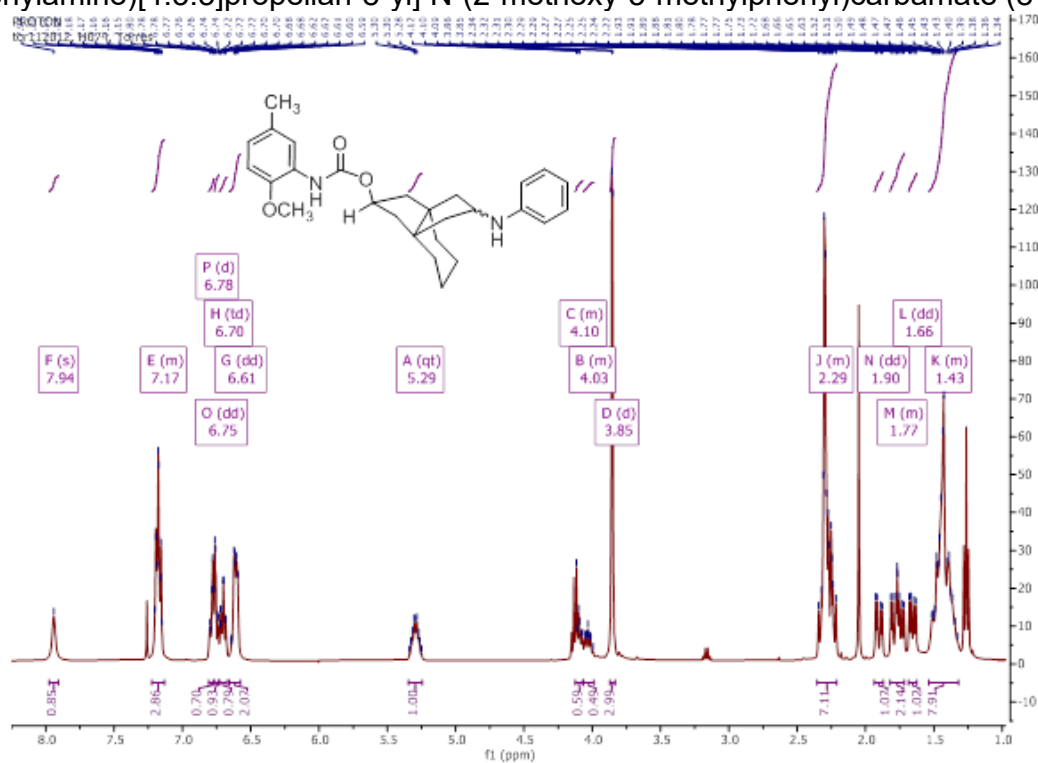

$^{13}\text{C}$  NMR spectrum of [(8-*anti*-11-*anti* and 8-*anti*-11-*syn*)-11-(Phenylamino)[4.3.3]propellan-8-yl] N-(2-methoxy-5-methylphenyl)carbamate (8-*anti*-4I)

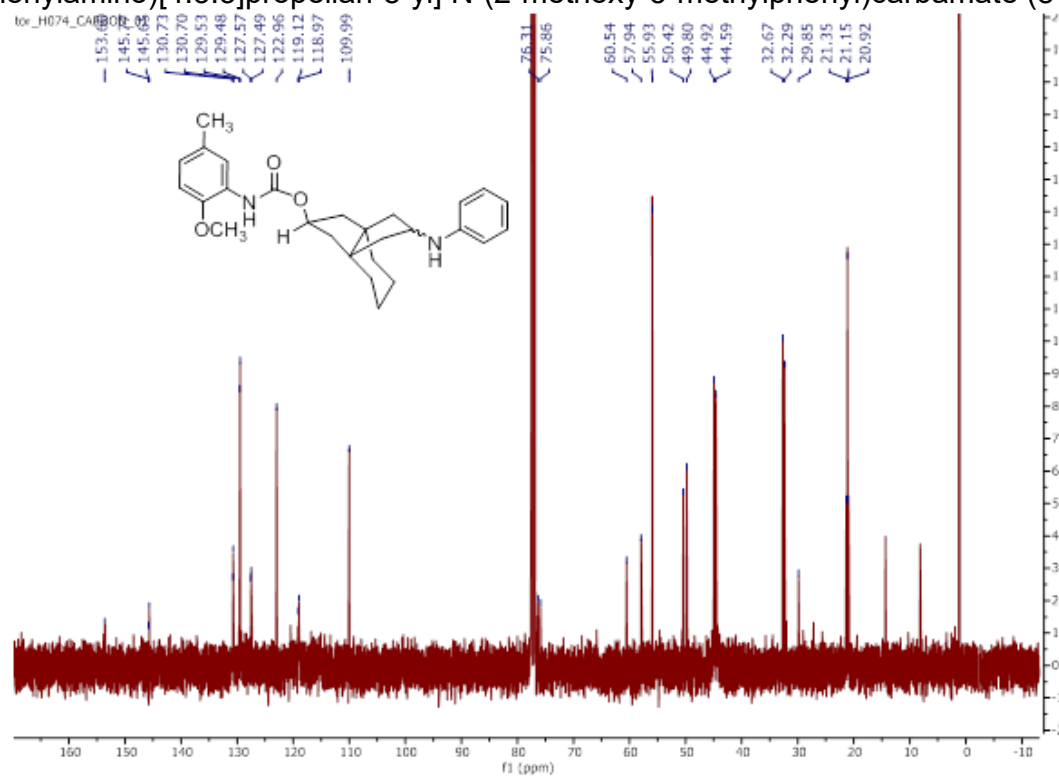

$^1\text{H}$  NMR spectrum of [(8-*anti*-11-*anti* and 8-*anti*-11-*syn*)-11-(4-Methoxyphenylamino)[4.3.3]propellan-8-yl] N-(2-methoxy-5-methylphenyl)carbamate (8-*anti*-4m)

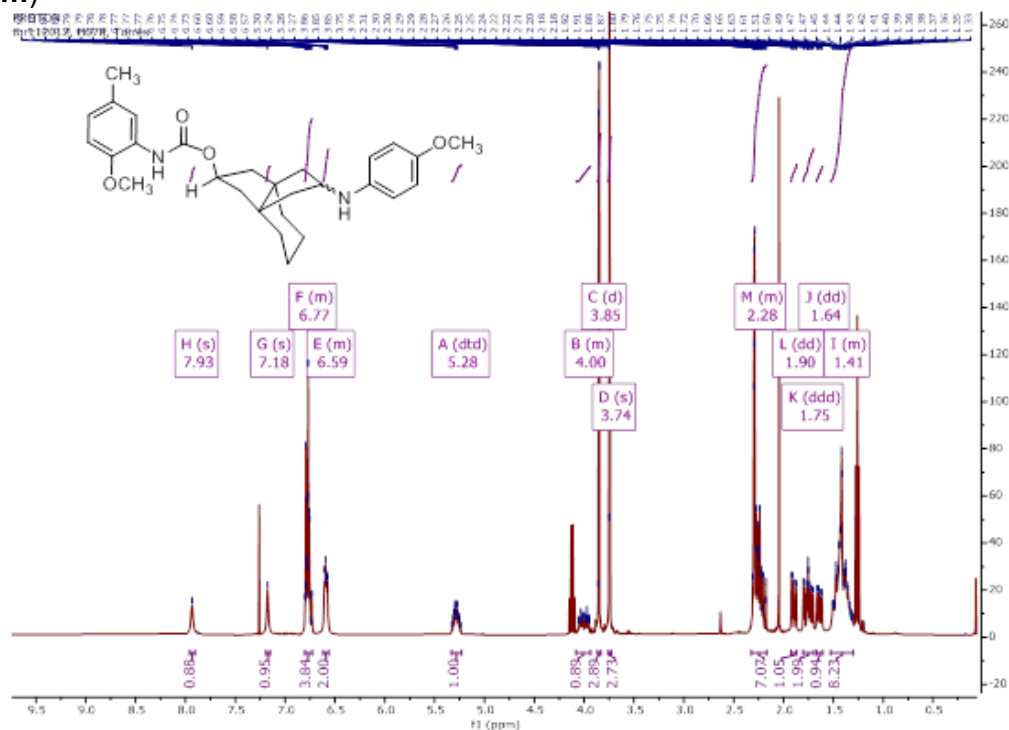

$^{13}\text{C}$  NMR spectrum of [(8-*anti*-11-*anti* and 8-*anti*-11-*syn*)-11-(4-Methoxyphenylamino)[4.3.3]propellan-8-yl] N-(2-methoxy-5-methylphenyl)carbamate (8-*anti*-4m)

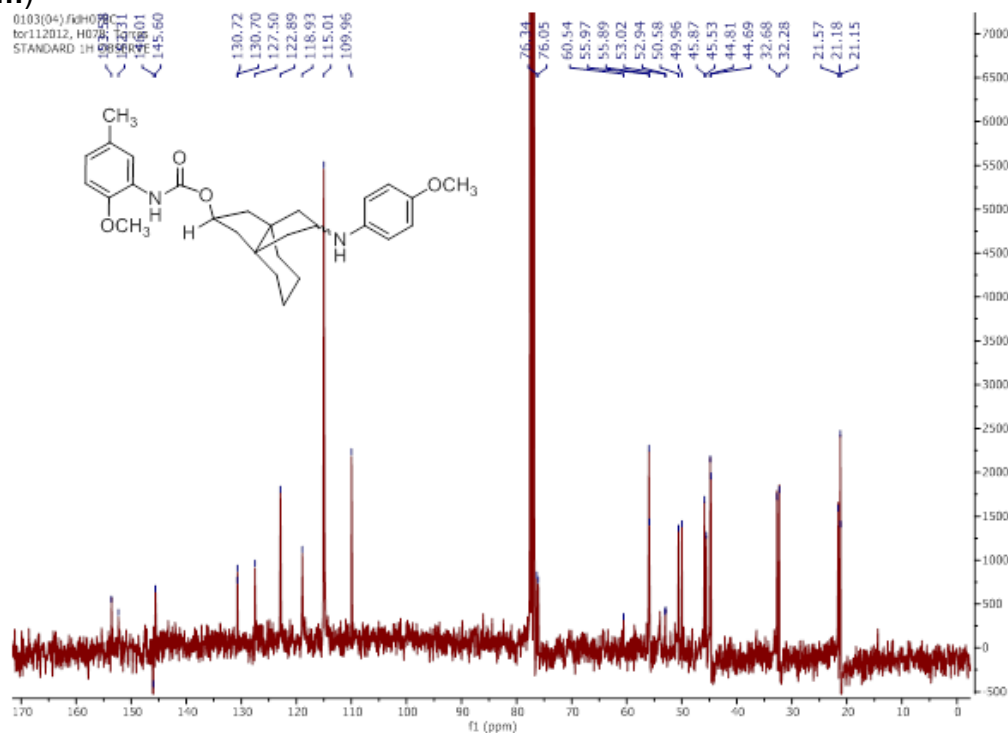

$^1\text{H}$  NMR spectrum of [(8-*anti*-11-*anti* and 8-*anti*-11-*syn*)-11-(3-Chloro-4-methoxyphenylamino)[4.3.3]propellan-8-yl] N-(2-methoxy-5-methylphenyl)carbamate (8-*anti*-4n)

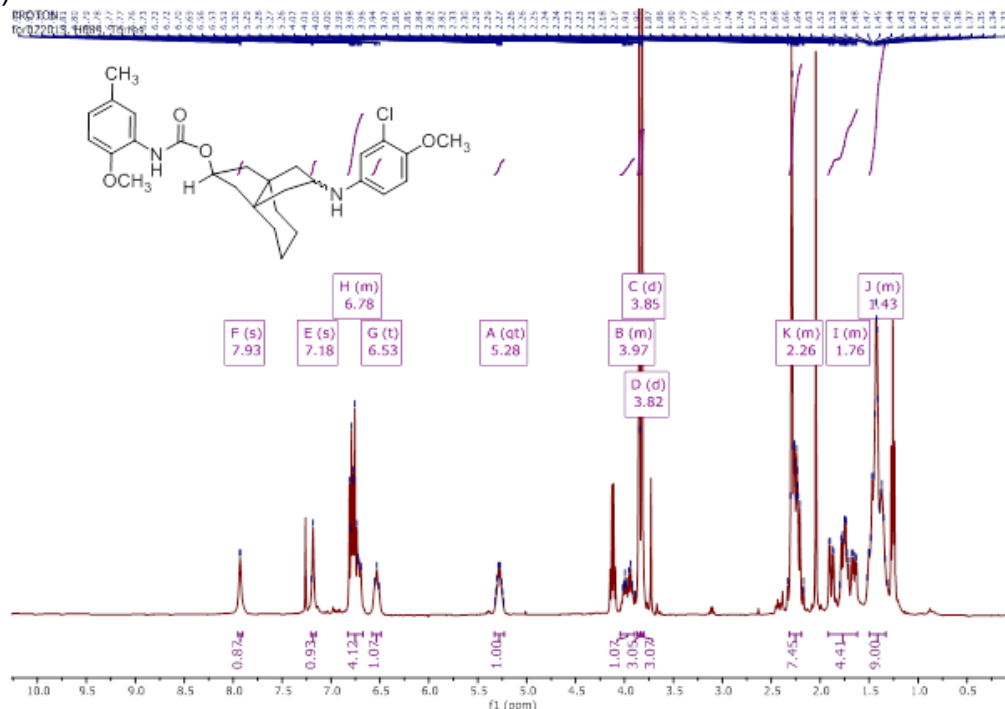

$^{13}\text{C}$  NMR spectrum of [(8-*anti*-11-*anti* and 8-*anti*-11-*syn*)-11-(3-Chloro-4-methoxyphenylamino)[4.3.3]propellan-8-yl] N-(2-methoxy-5-methylphenyl)carbamate (8-*anti*-4n)

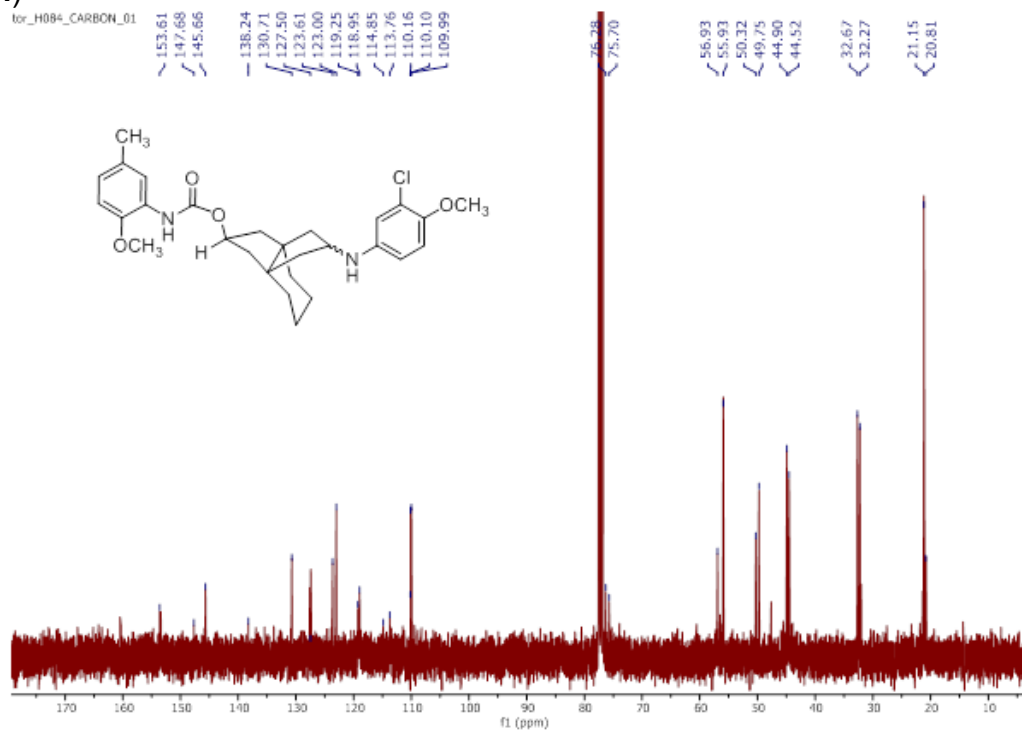

HSQC NMR spectrum of [(8-*anti*-11-*anti* and 8-*anti*-11-*syn*)-11-(3-Chloro-4-methoxyphenylamino)[4.3.3]propellan-8-yl] N-(2-methoxy-5-methylphenyl)carbamate (8-*anti*-4n)

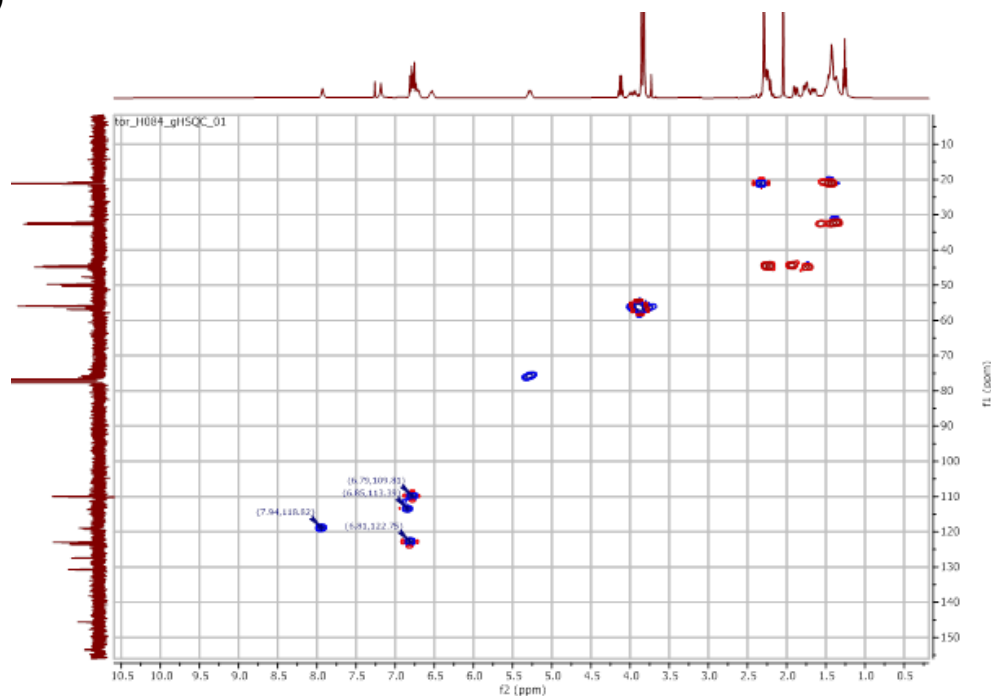

<sup>1</sup>H NMR spectrum of [(8-*anti*-11-*anti* and 8-*anti*-11-*syn*)-11-(4-Aminophenylamino)[4.3.3]propellan-8-yl] N-(2-methoxy-5-methylphenyl)carbamate (8-*anti*-4o)

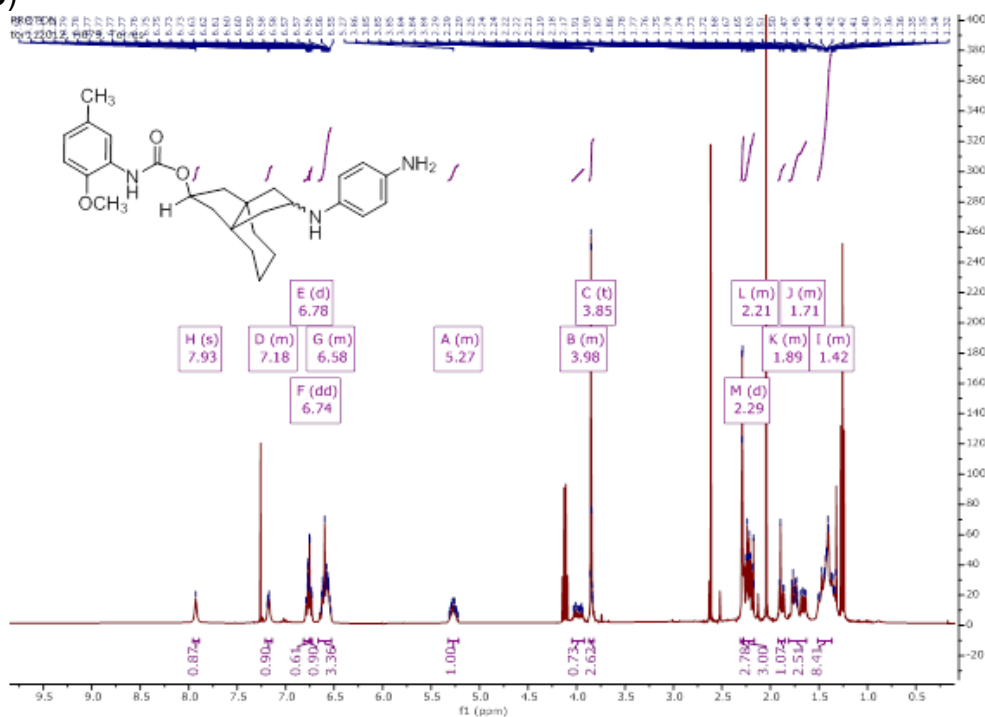

$^{13}\text{C}$  NMR spectrum of [(8-*anti*-11-*anti* and 8-*anti*-11-*syn*)-11-(4-Aminophenylamino)[4.3.3]propellan-8-yl] N-(2-methoxy-5-methylphenyl)carbamate (8-*anti*-**4o**)

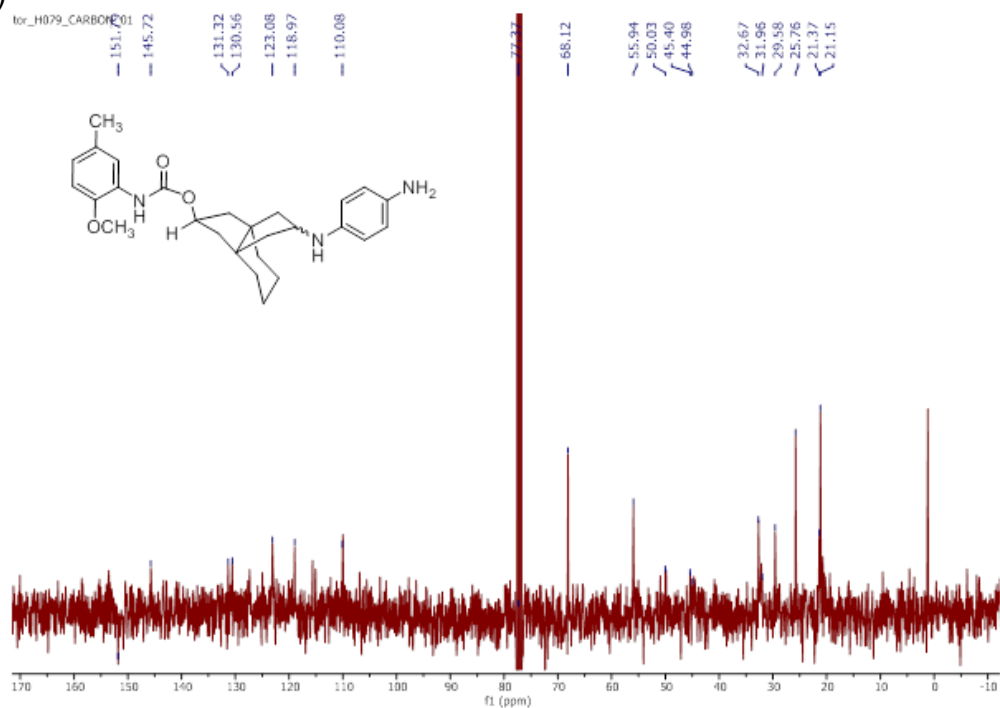

HSQC NMR spectrum of [(8-*anti*-11-*anti* and 8-*anti*-11-*syn*)-11-(4-Aminophenylamino)[4.3.3]propellan-8-yl] N-(2-methoxy-5-methylphenyl)carbamate (8-*anti*-**4o**)

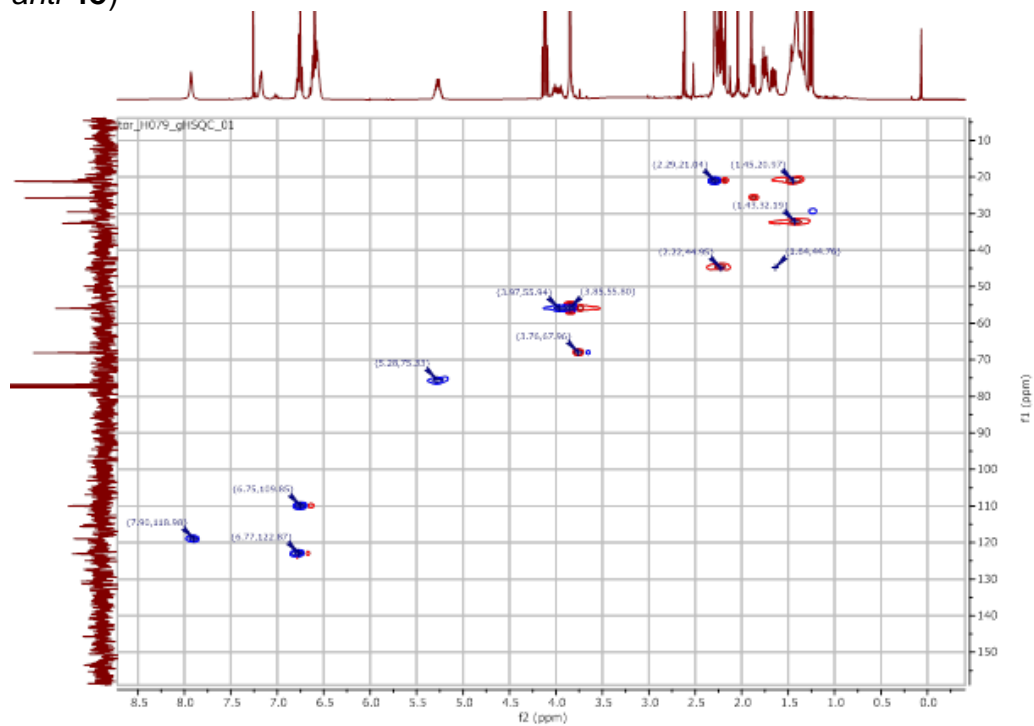

$^1\text{H}$  NMR spectrum of [(8-*anti*-11-*anti* and 8-*anti*-11-*syn*)-11-(Phenethylamino)[4.3.3]propellan-8-yl] N-(2-methoxy-5-methylphenyl)carbamate (8-*anti*-4p)

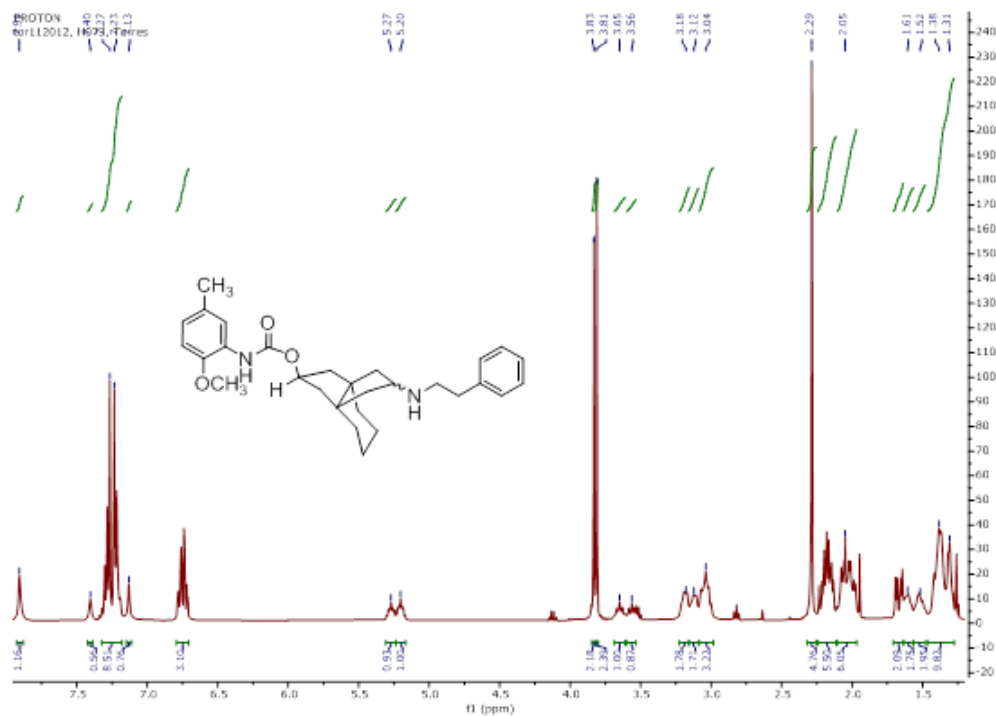

$^{13}\text{C}$  NMR spectrum of [(8-*anti*-11-*anti* and 8-*anti*-11-*syn*)-11-(Phenethylamino)[4.3.3]propellan-8-yl] N-(2-methoxy-5-methylphenyl)carbamate (8-*anti*-4p)

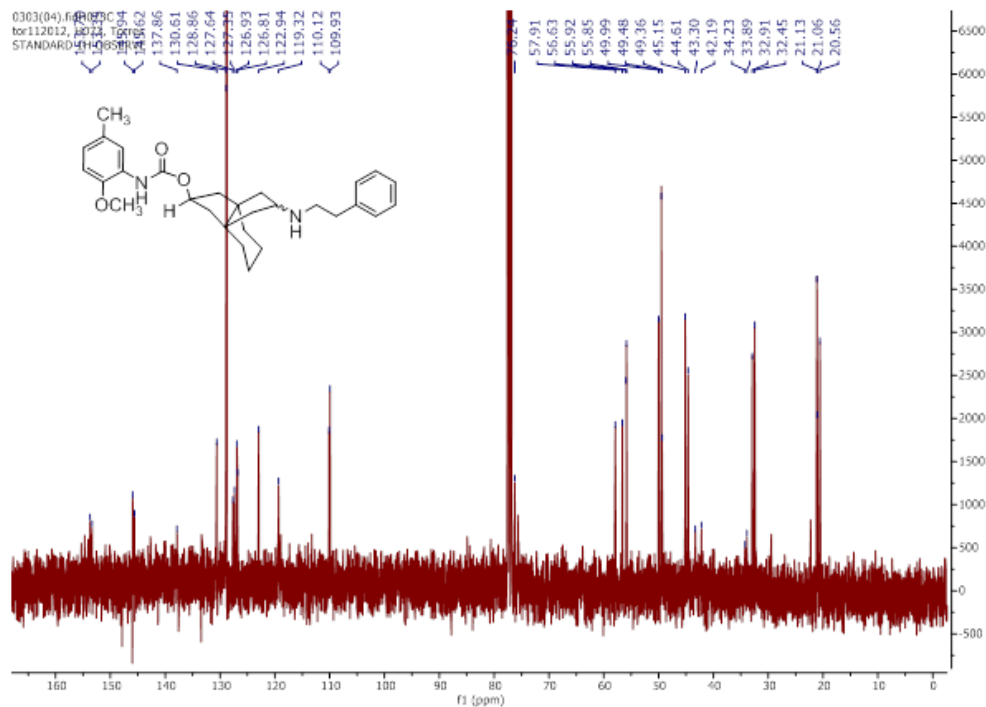

HSQC NMR spectrum of [(8-*anti*-11-*anti* and 8-*anti*-11-*syn*)-11-(Phenethylamino)[4.3.3]propellan-8-yl] N-(2-methoxy-5-methylphenyl)carbamate (8-*anti*-4p)

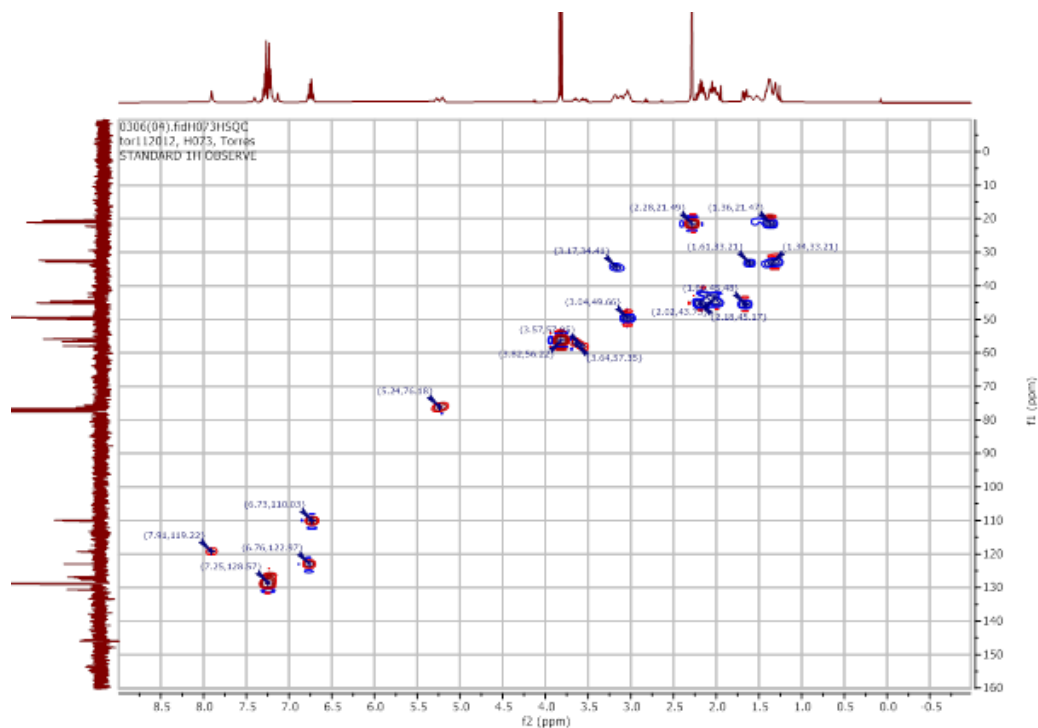

$^1\text{H}$  NMR spectrum of [(8-*anti*-11-*anti* and 8-*anti*-11-*syn*)-11-(3-Phenylpropylamino)[4.3.3]propellan-8-yl] N-(2-methoxy-5-methylphenyl)carbamate (8-*anti*-4q)

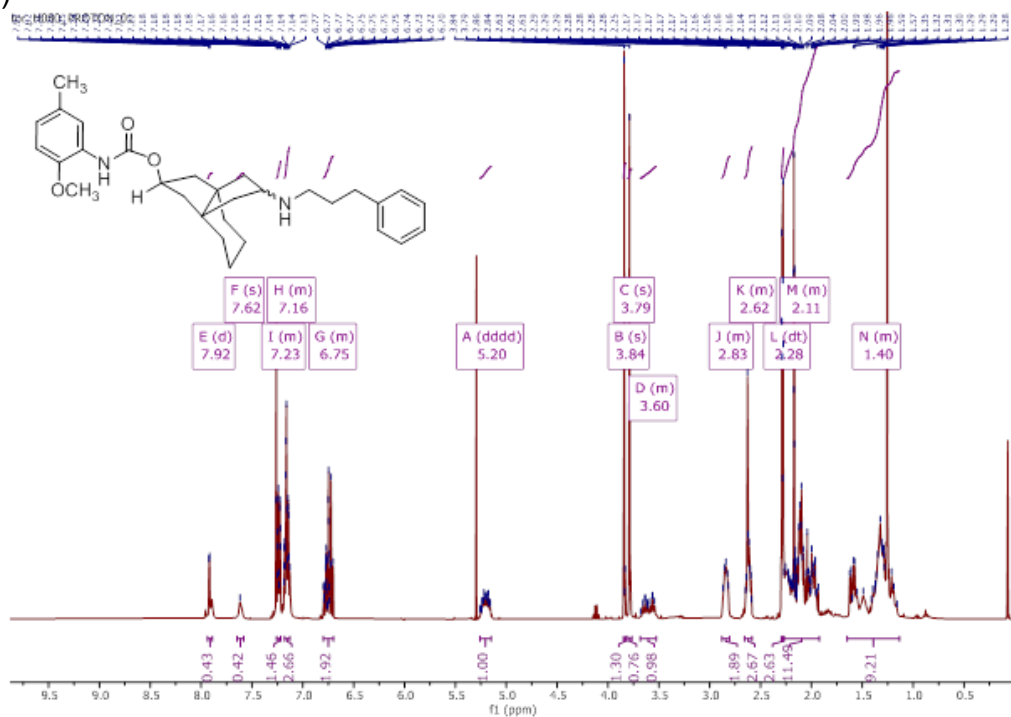

$^{13}\text{C}$  NMR spectrum of [(8-*anti*-11-*anti* and 8-*anti*-11-*syn*)-11-(3-Phenylpropylamino)[4.3.3]propellan-8-yl] N-(2-methoxy-5-methylphenyl)carbamate (8-*anti*-4q)

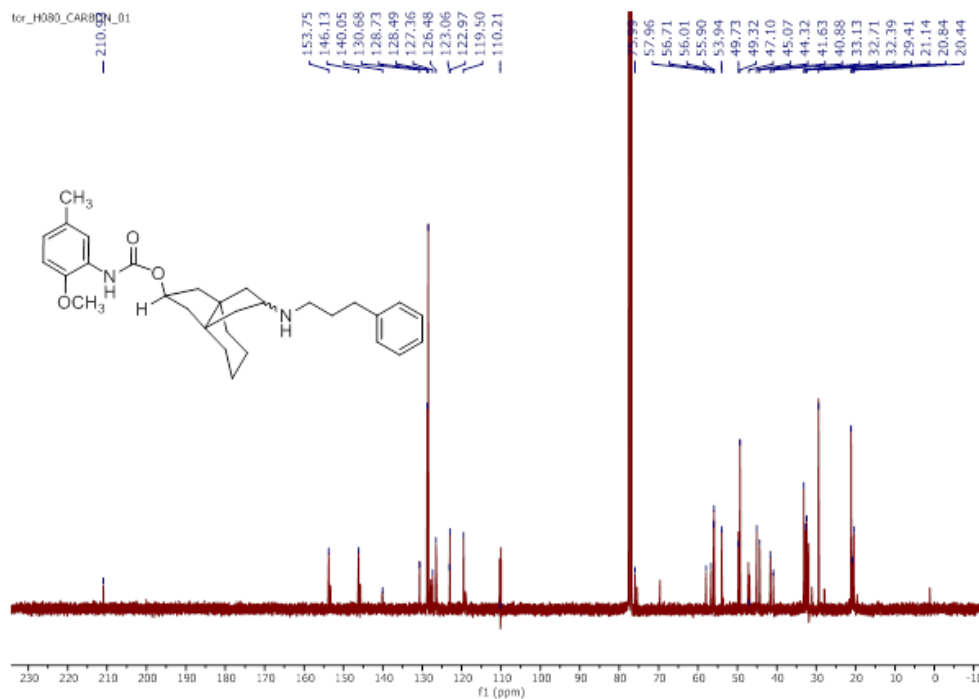

$^1\text{H}$  NMR spectrum of [(8-*anti*-11-*anti* and 8-*anti*-11-*syn*)-11-(3-Aminopropylamino)[4.3.3]propellan-8-yl] N-(2-methoxy-5-methylphenyl)carbamate (8-*anti*-4r)

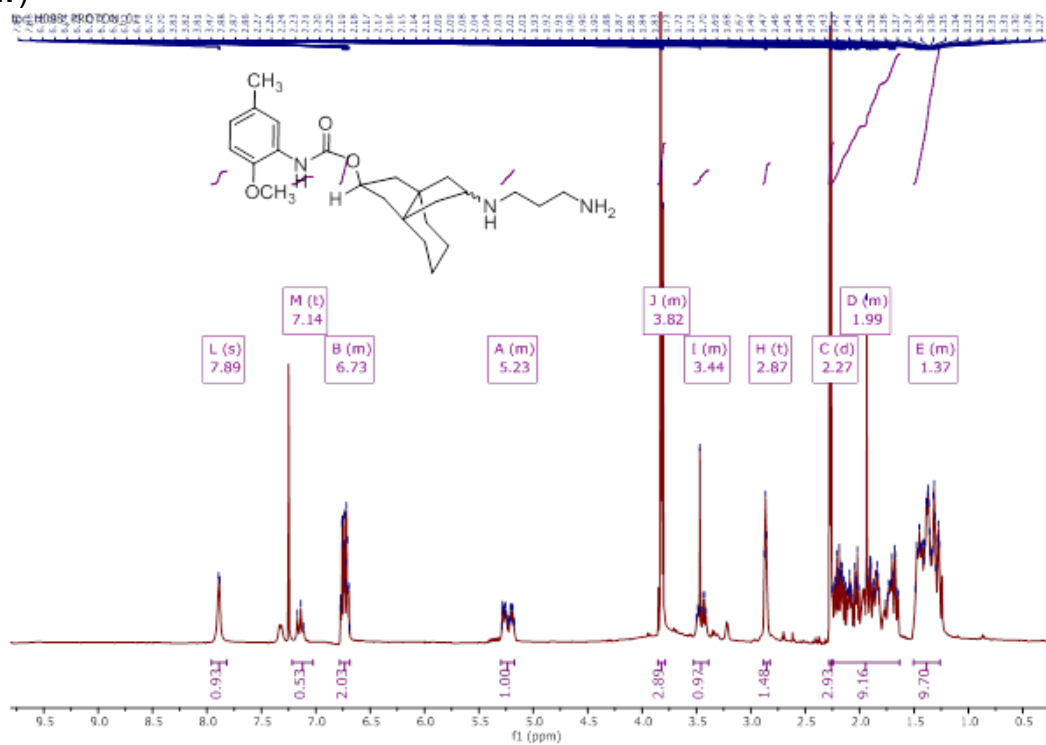



$^{13}\text{C}$  NMR spectrum of [(8-*anti*-11-*anti* and 8-*anti*-11-*syn*)-11-[(3-Aminopropyl)amino][4.3.3]propellan-8-yl] N-(2-methoxy-5-methylphenyl)carbamate (8-*anti*-4r)

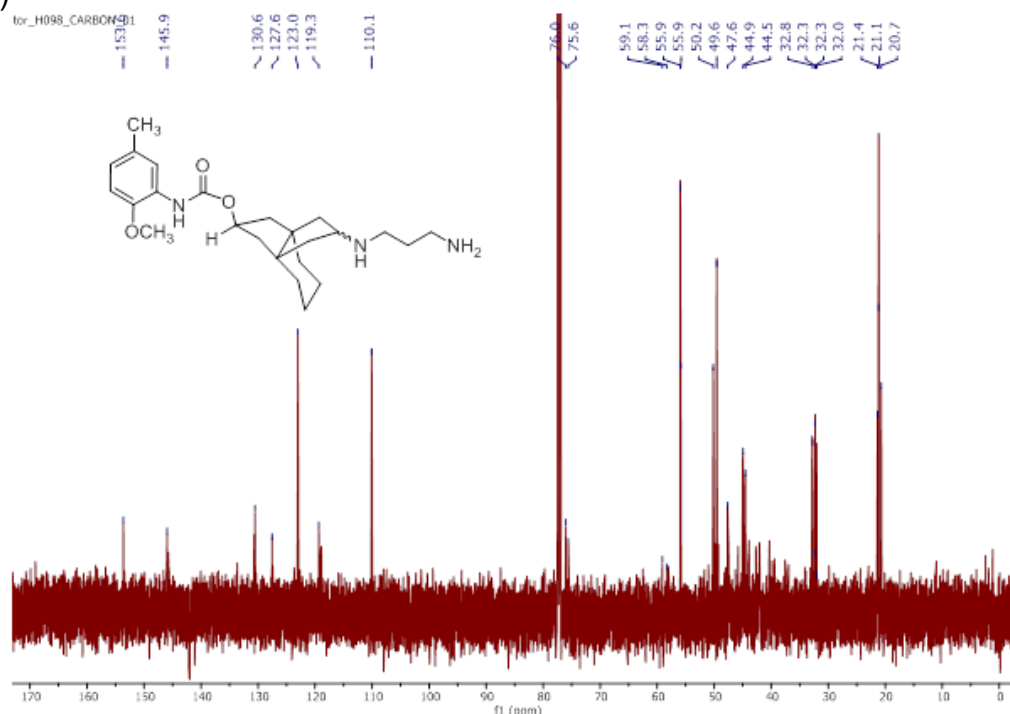

HSQC NMR spectrum of [(8-*anti*-11-*anti* and 8-*anti*-11-*syn*)-11-[(3-Aminopropyl)amino][4.3.3]propellan-8-yl] N-(2-methoxy-5-methylphenyl)carbamate (8-*anti*-4r)

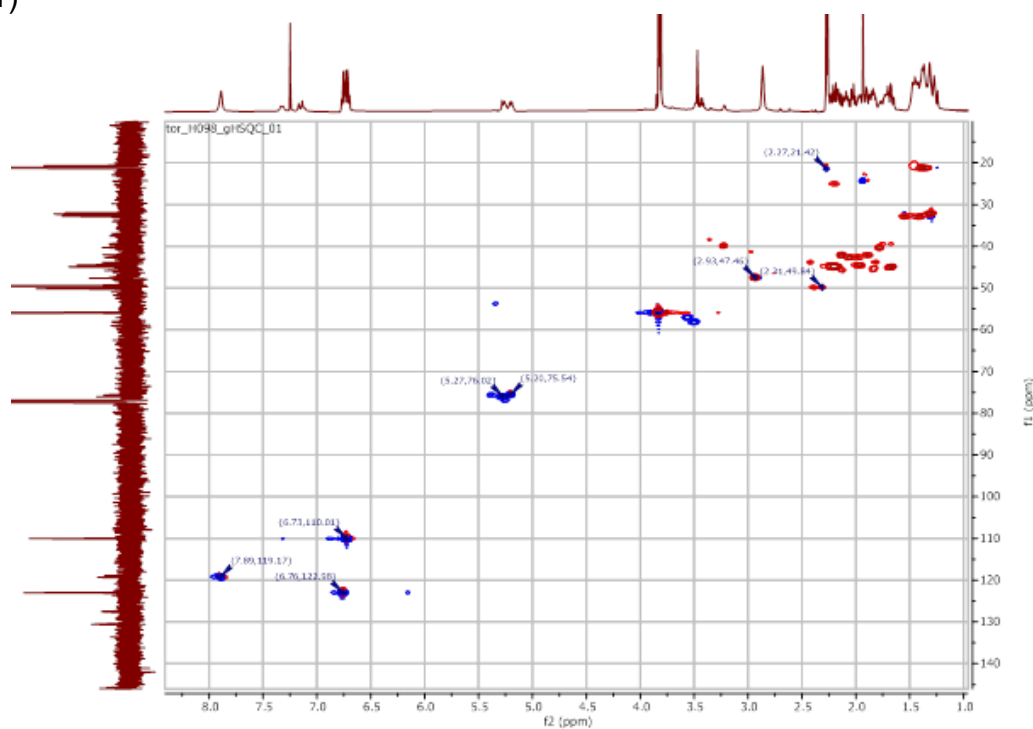

$^1\text{H}$  NMR spectrum of [(8-*anti*-11-*anti* and 8-*anti*-11-*syn*)-11-(2-Hydroxyethyl-1-amino)[4.3.3]propellan-8-yl] N-(2-methoxy-5-methylphenyl)carbamate (8-*anti*-4s)

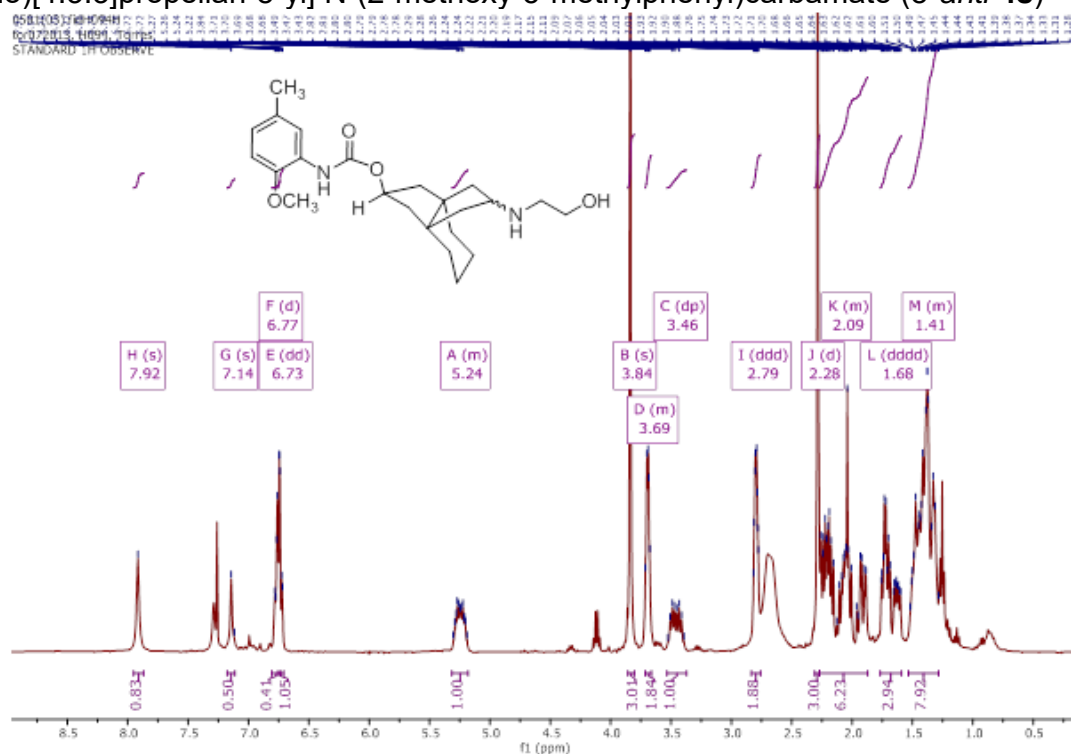

$^{13}\text{C}$  NMR spectrum of [(8-*anti*-11-*anti* and 8-*anti*-11-*syn*)-11-(2-Hydroxyethyl-1-amino)[4.3.3]propellan-8-yl] N-(2-methoxy-5-methylphenyl)carbamate (8-*anti*-4s)

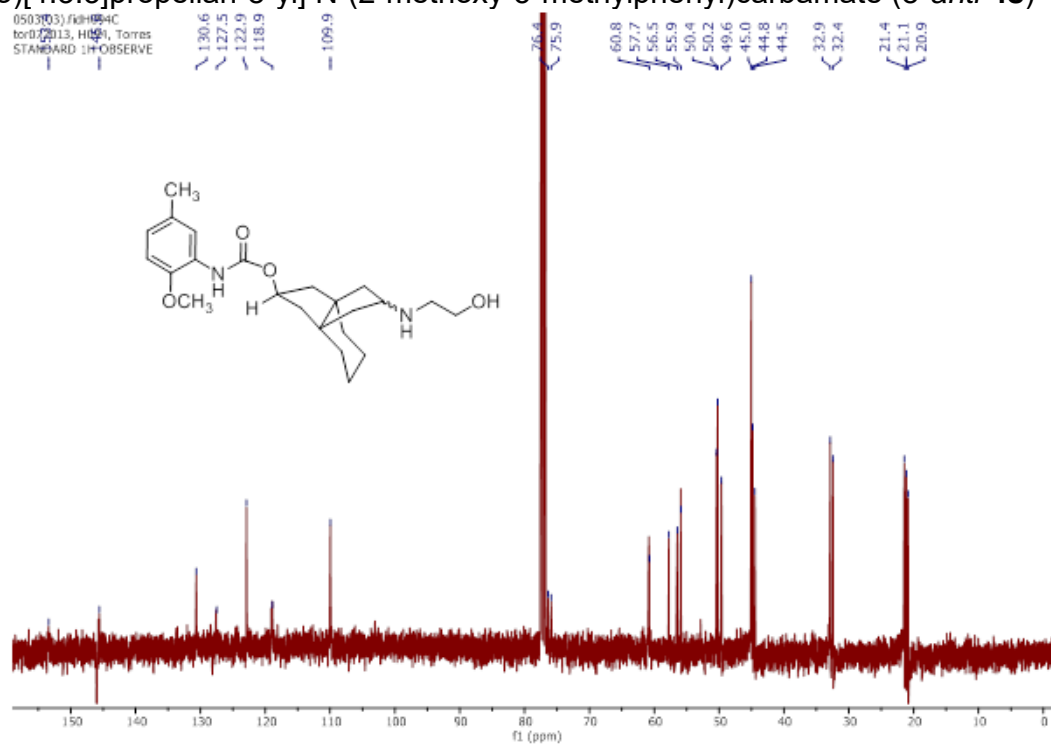

$^1\text{H}$  NMR spectrum of [(8-*anti*-11-*anti* and 8-*anti*-11-*syn*)-11-(5-Hydroxypentylamino)[4.3.3]propellan-8-yl] N-(2-methoxy-5-methylphenyl)carbamate (8-*anti*-4t)

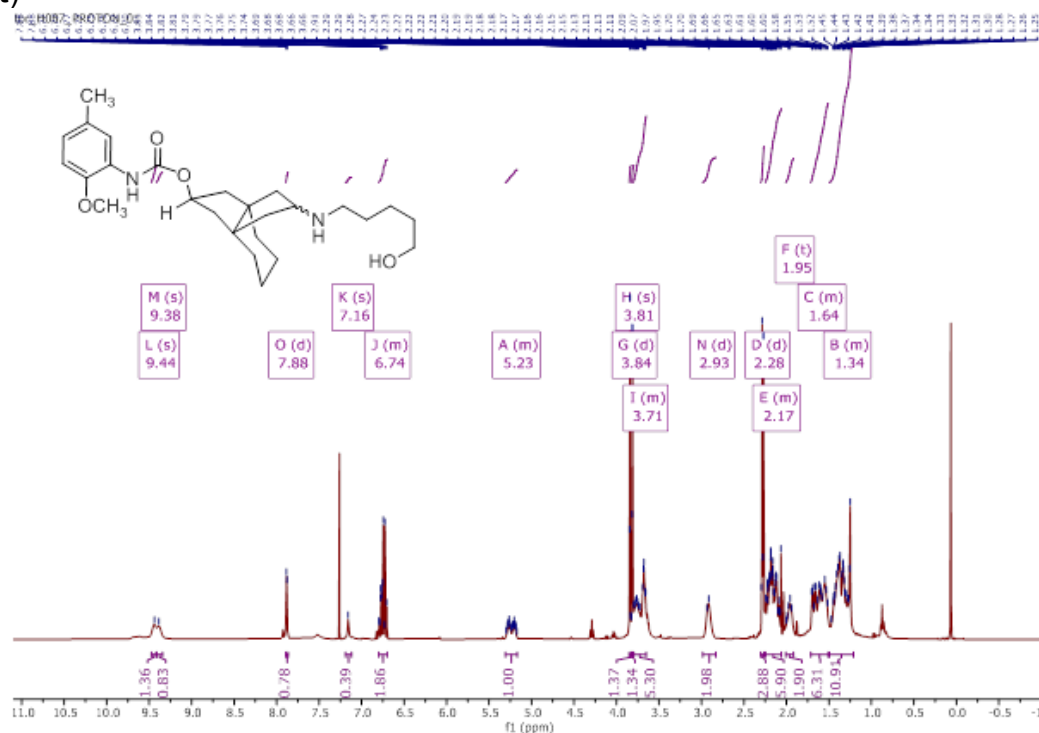

$^{13}\text{C}$  NMR spectrum of [(8-*anti*-11-*anti* and 8-*anti*-11-*syn*)-11-(5-Hydroxypentylamino)[4.3.3]propellan-8-yl] N-(2-methoxy-5-methylphenyl)carbamate (8-*anti*-4t)

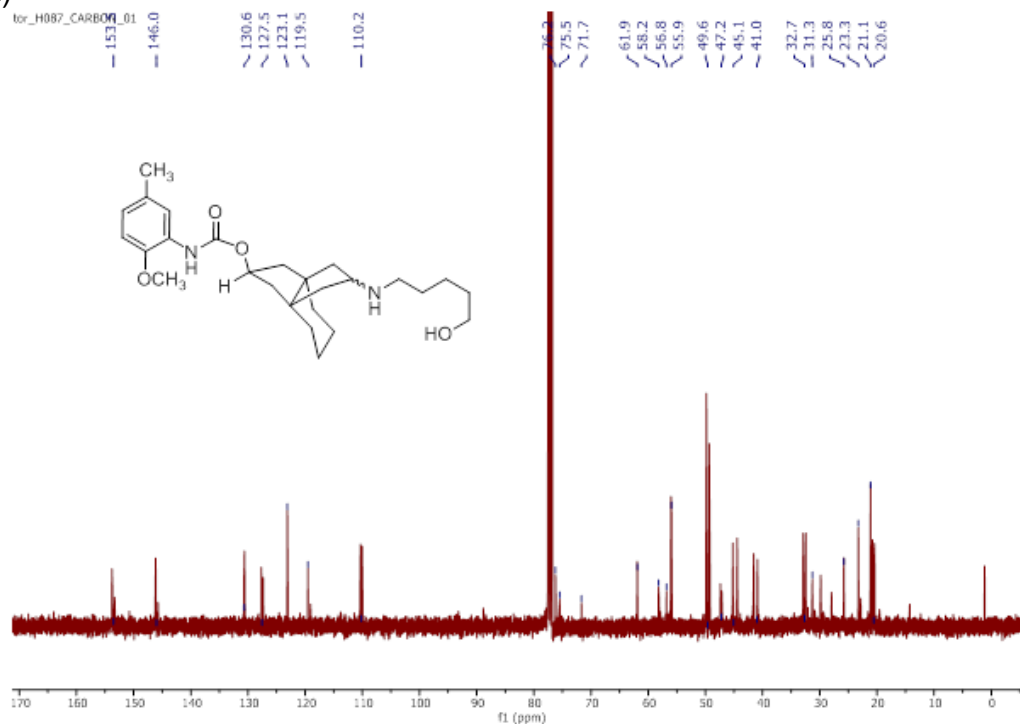

<sup>1</sup>H NMR spectrum of [(8-*anti*-11-*anti* and 8-*anti*-11-*syn*)-11-(Isobutylamino)[4.3.3]propellane-8-yl] N-(2-methoxy-5-methylphenyl)carbamate (8-*anti*-4u)

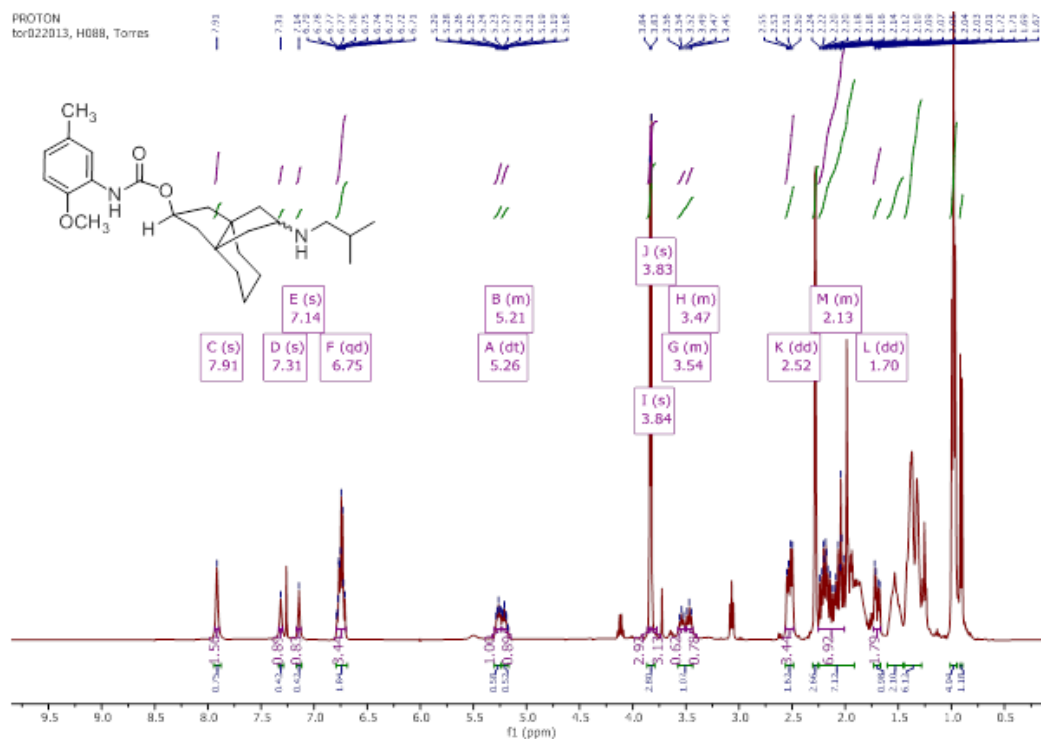

<sup>13</sup>C NMR spectrum of [(8-*anti*-11-*anti* and 8-*anti*-11-*syn*)-11-(Isobutylamino)[4.3.3]propellane-8-yl] N-(2-methoxy-5-methylphenyl)carbamate (8-*anti*-4u)

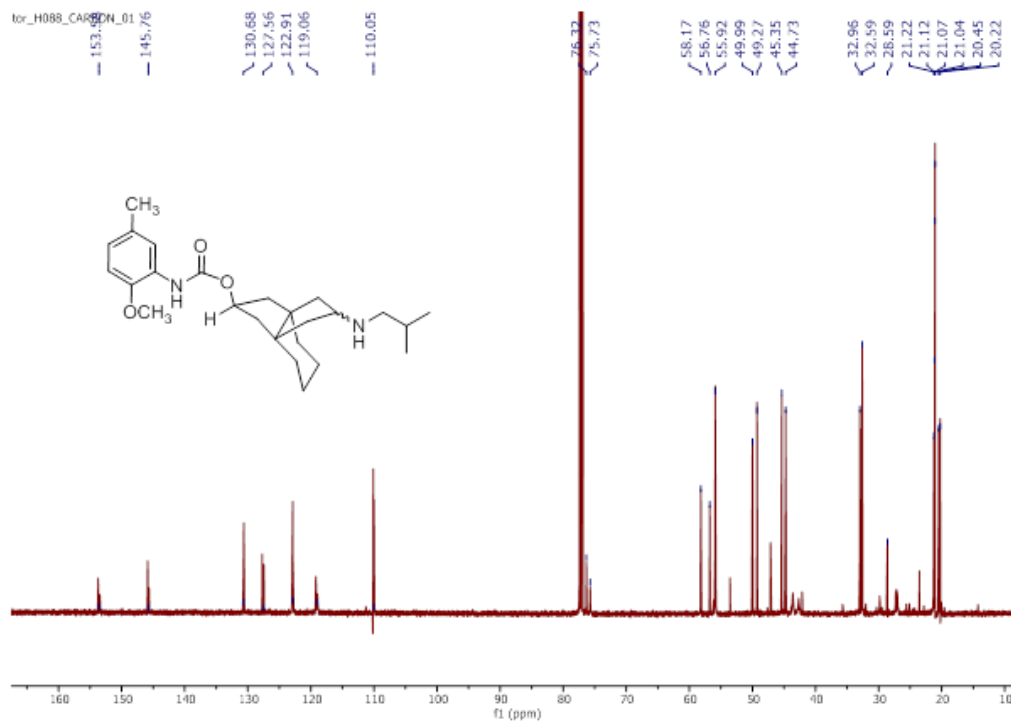

<sup>1</sup>H NMR spectrum of [(8-*anti*-11-*anti* and 8-*anti*-11-*syn*)-11-(amino)[4.3.3]propellan-8-yl] N-(2-methoxy-5-methylphenyl)carbamate (8-*anti*-**4v**)

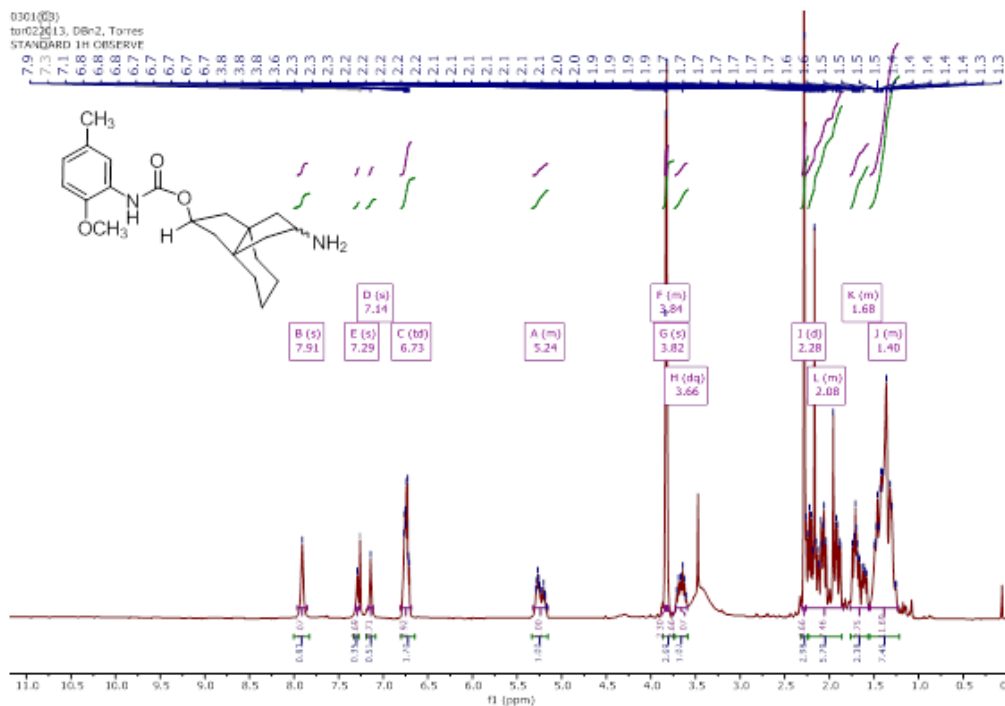

<sup>13</sup>C NMR spectrum of [(8-*anti*-11-*anti* and 8-*anti*-11-*syn*)-11-(amino)[4.3.3]propellan-8-yl] N-(2-methoxy-5-methylphenyl)carbamate (8-*anti*-**4v**)

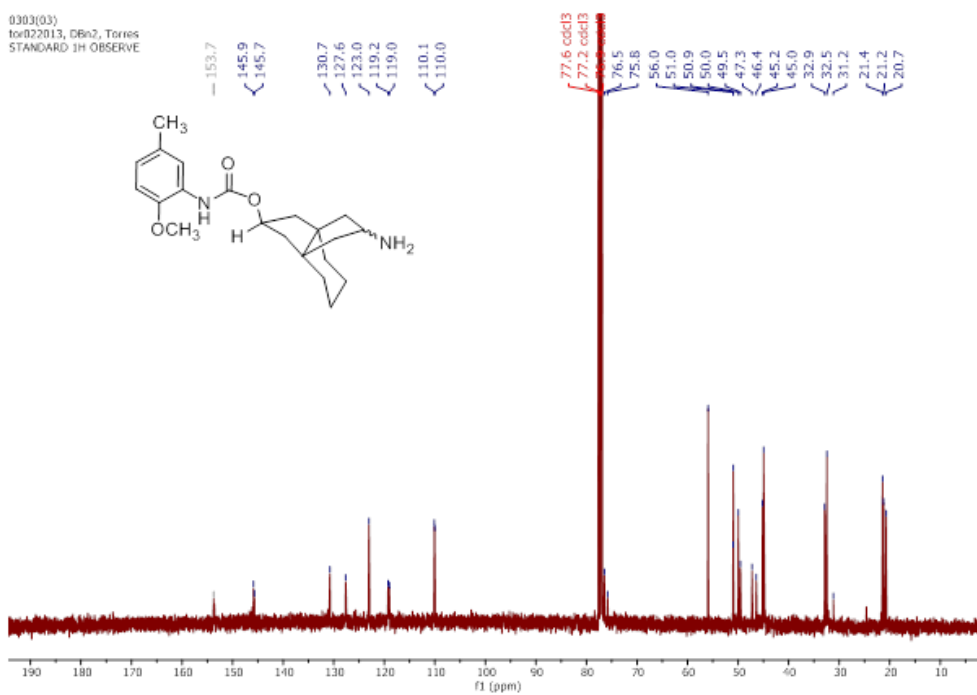

S110

$^1\text{H}$  NMR spectrum of [(8-*anti*-11-*anti* and 8-*anti*-11-*syn*)-11-(Benzylamino)[4.3.3]propellan-8-ol (11-*anti*-13)

PROTON\_01

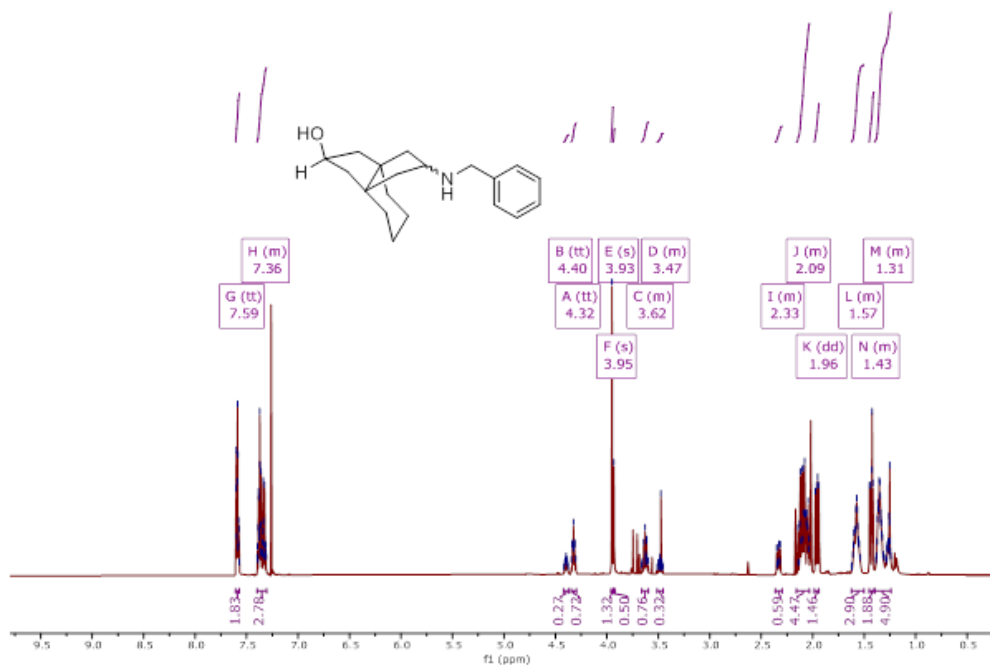

$^{13}\text{C}$  NMR spectrum of [(8-*anti*-11-*anti* and 8-*anti*-11-*syn*)-11-(Benzylamino)[4.3.3]propellan-8-ol (11-*anti*-13)

CARBON\_01

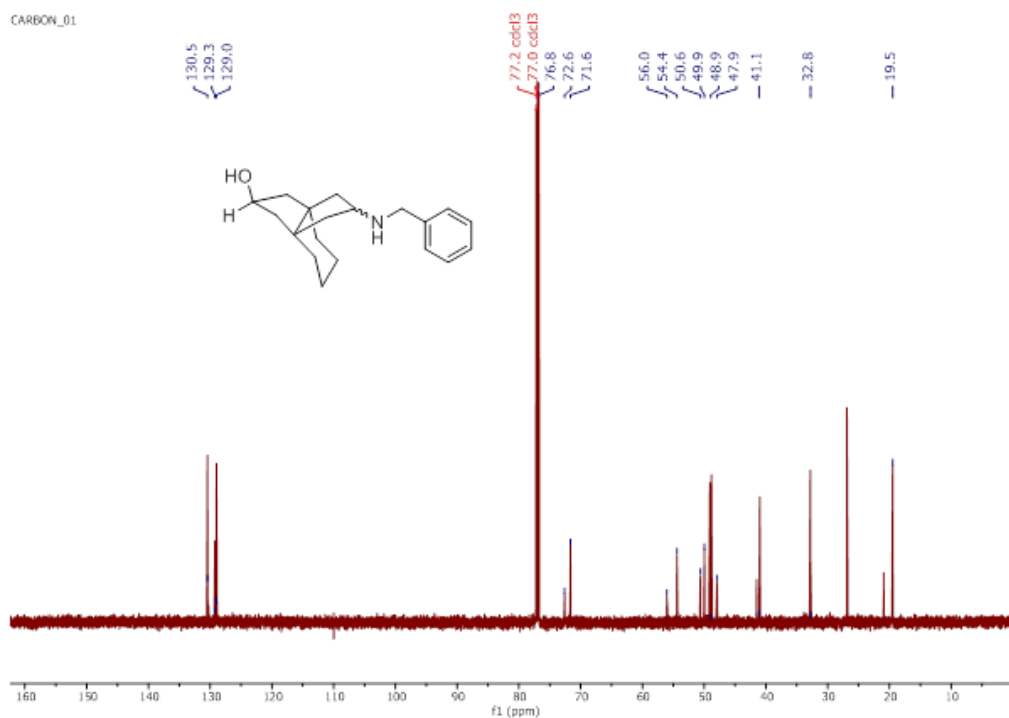

S111

$^1\text{H}$  NMR spectrum of [(8-*syn*-11-*syn* and 8-*syn*-11-*anti*)-11-(Benzylamino)[4.3.3]propellan-8-ol (11-*syn*-13)

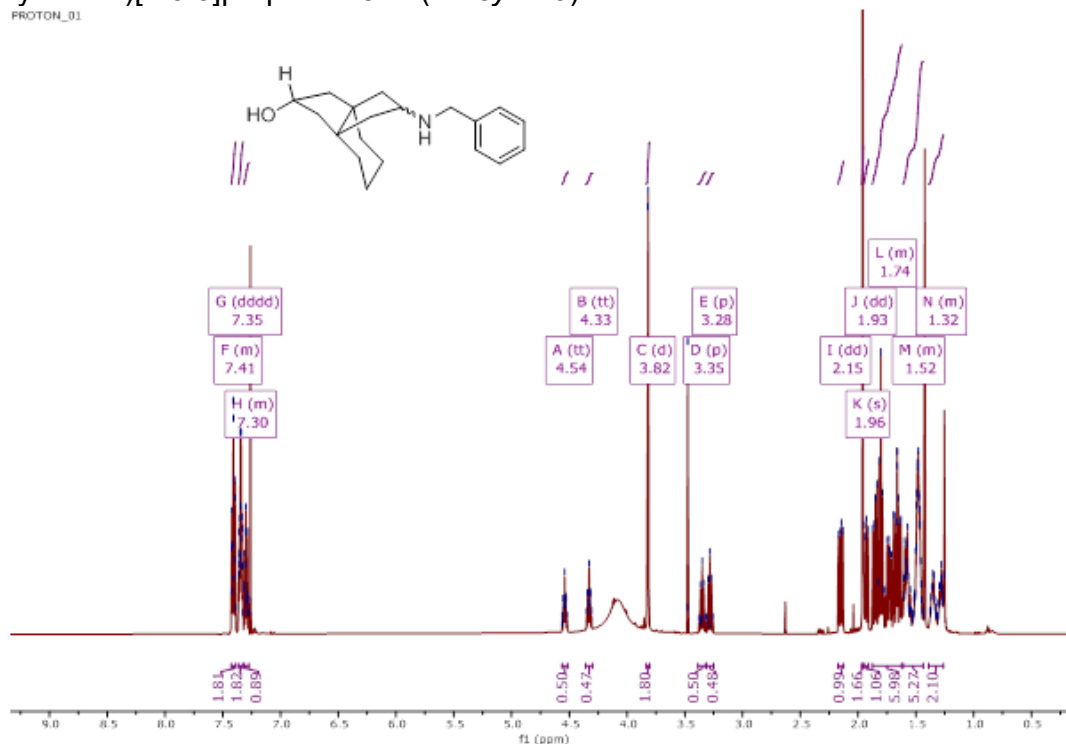

$^{13}\text{C}$  NMR spectrum of [(8-*syn*-11-*syn* and 8-*syn*-11-*anti*)-11-(Benzylamino)[4.3.3]propellan-8-ol (11-*syn*-13)

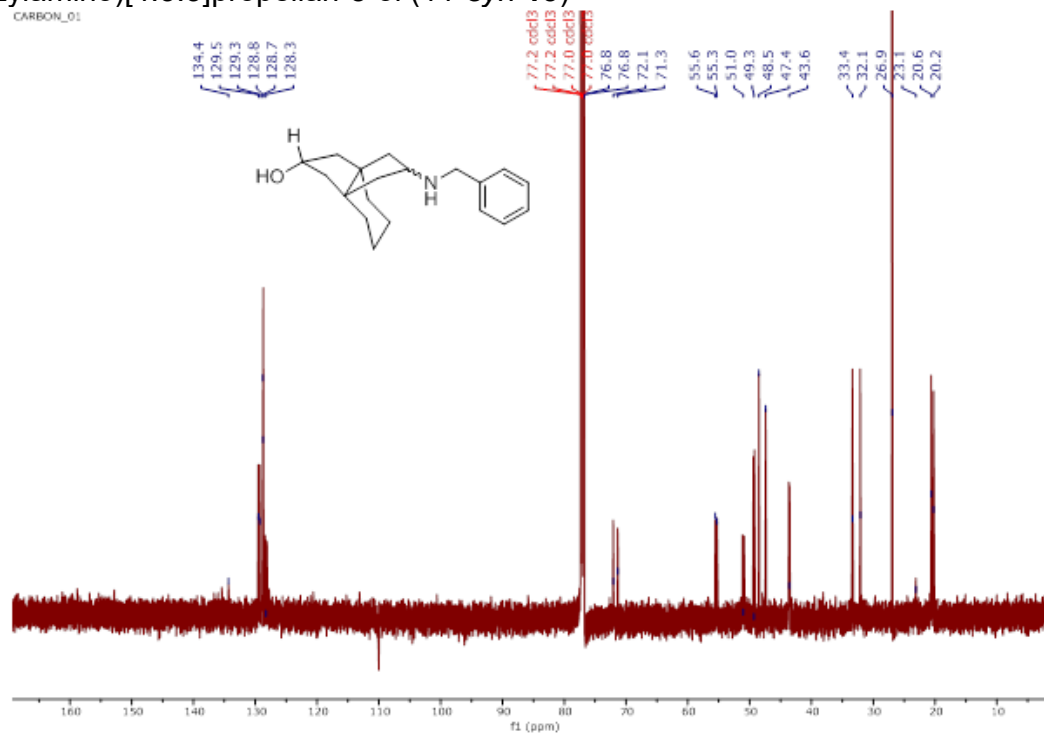

S112

<sup>1</sup>H NMR spectrum of (11'-syn)-Spiro-([1,3]-dioxolane-2,8'-(N-benzyl-[4.3.3]propellan))-11'-amine (*syn*-**14**)

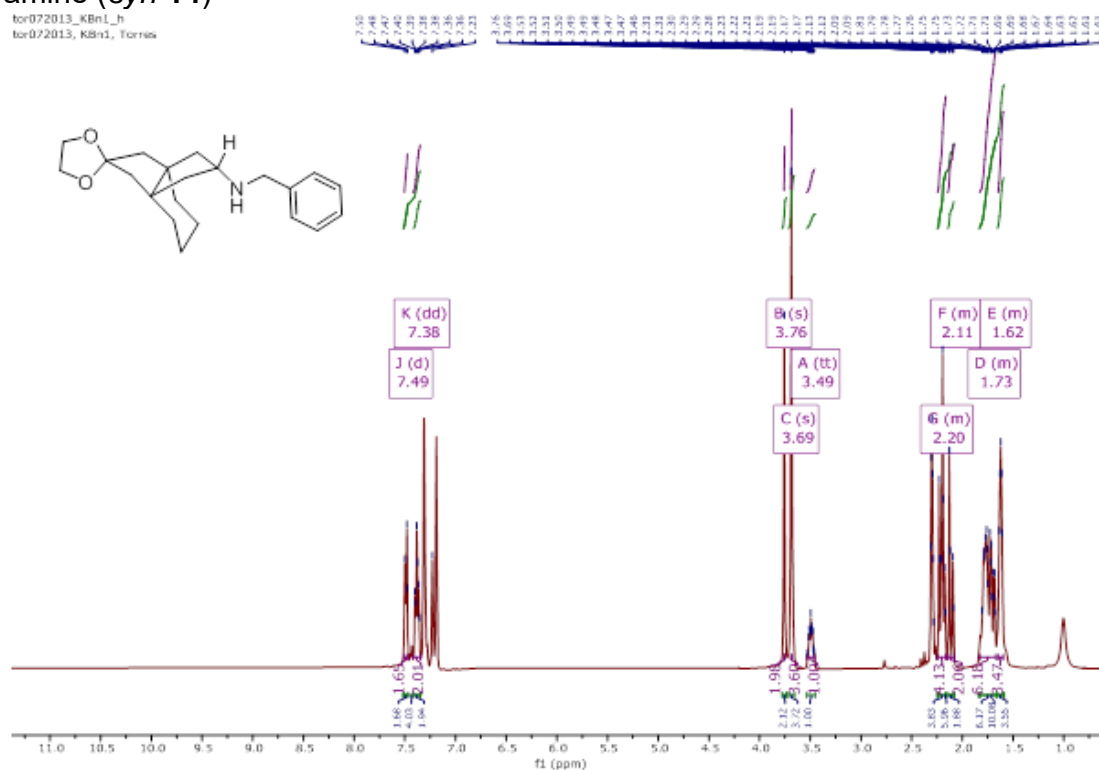

<sup>13</sup>C NMR spectrum of (11'-syn)-Spiro-([1,3]-dioxolane-2,8'-(N-benzyl-[4.3.3]propellan))-11'-amine (*syn*-**14**)

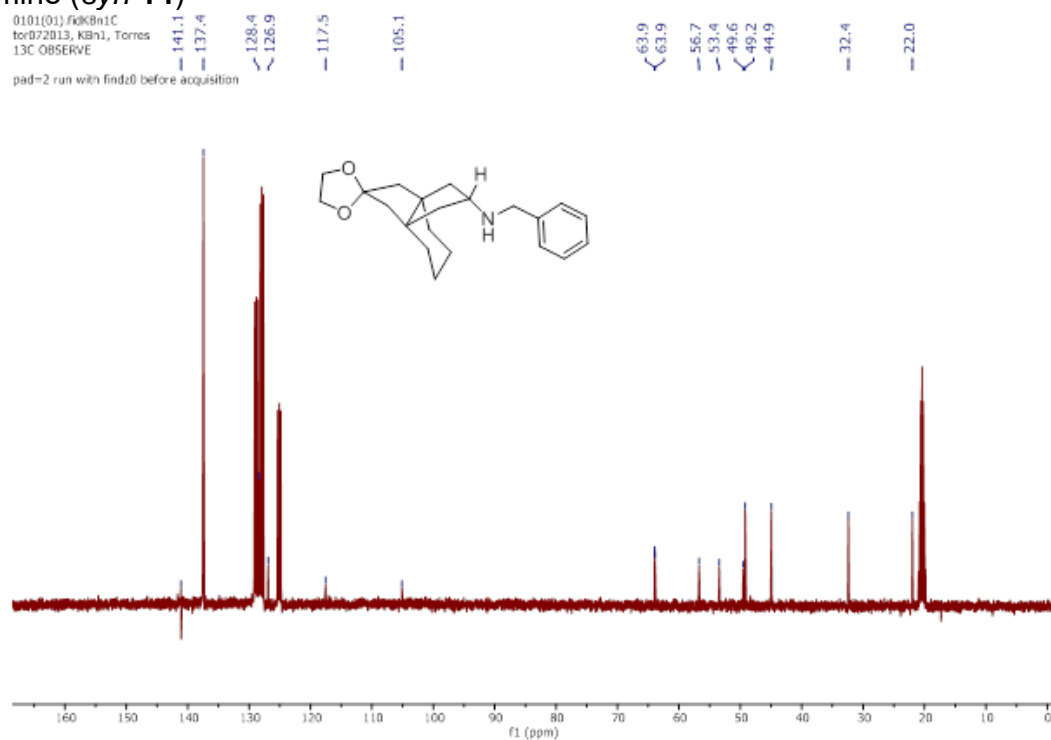



<sup>1</sup>H NMR spectrum of (11'-*anti*)-Spiro-([1,3]-dioxolane-2,8'-(N-benzyl-[4.3.3]propellan))-11'-amine (*anti*-**14**)

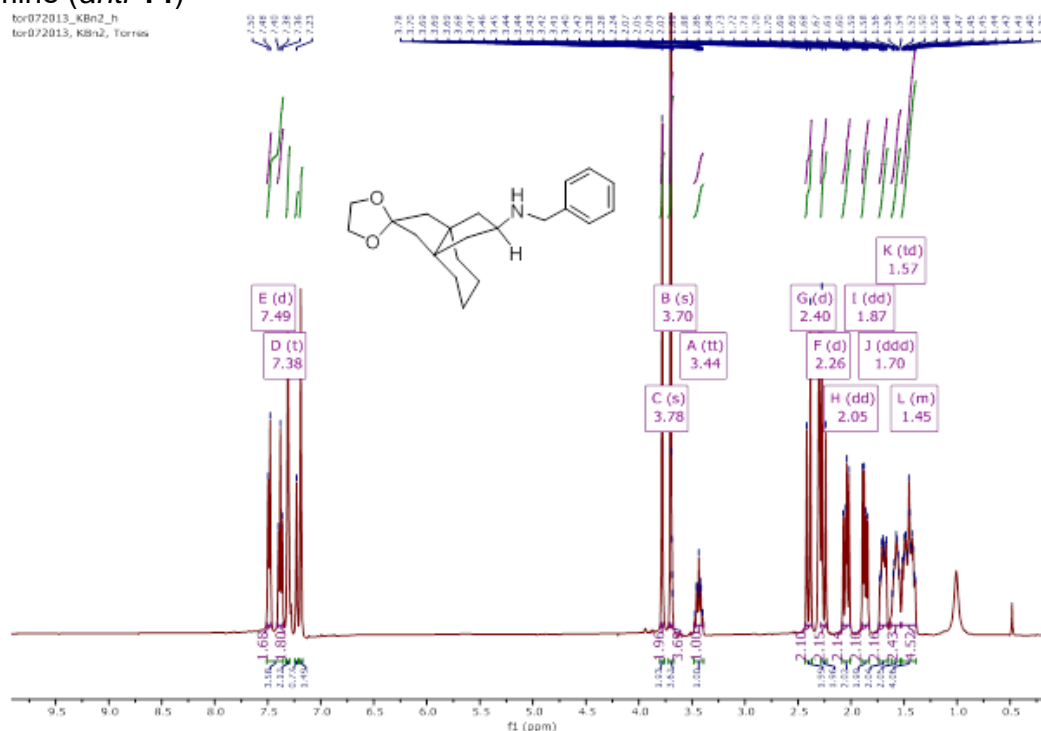

<sup>13</sup>C NMR spectrum of (11'-*anti*)-Spiro-([1,3]-dioxolane-2,8'-(N-benzyl-[4.3.3]propellan))-11'-amine (*anti*-**14**)

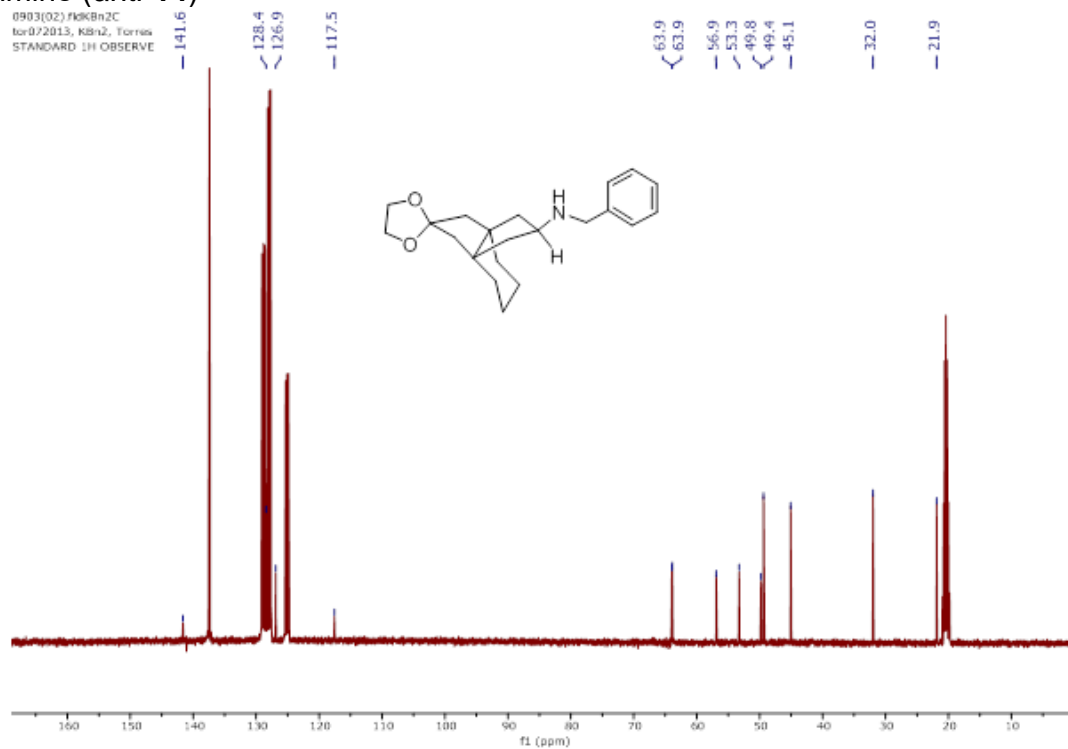

<sup>1</sup>H NMR spectrum of *syn*- and *anti*-N-[2-(Indol-3-yl)ethyl]-[4.3.3]propellan-8-amine (**15**)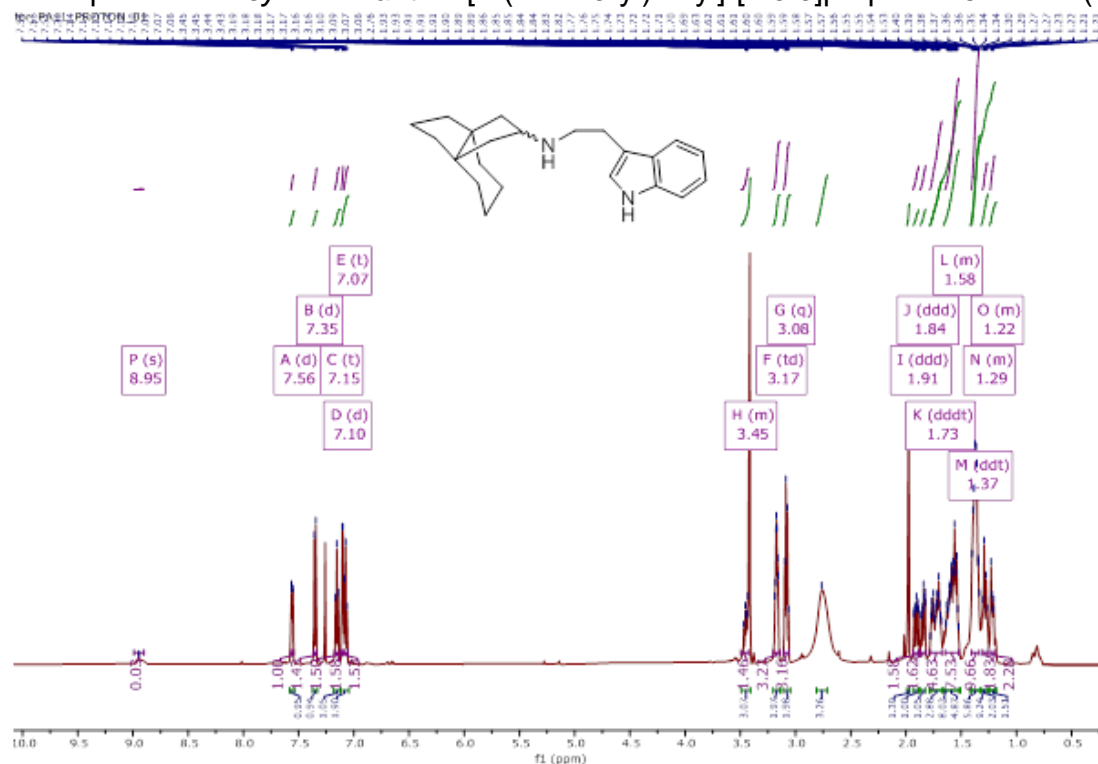<sup>13</sup>C NMR spectrum of *syn*- and *anti*-N-[2-(Indol-3-yl)ethyl]-[4.3.3]propellan-8-amine (**15**)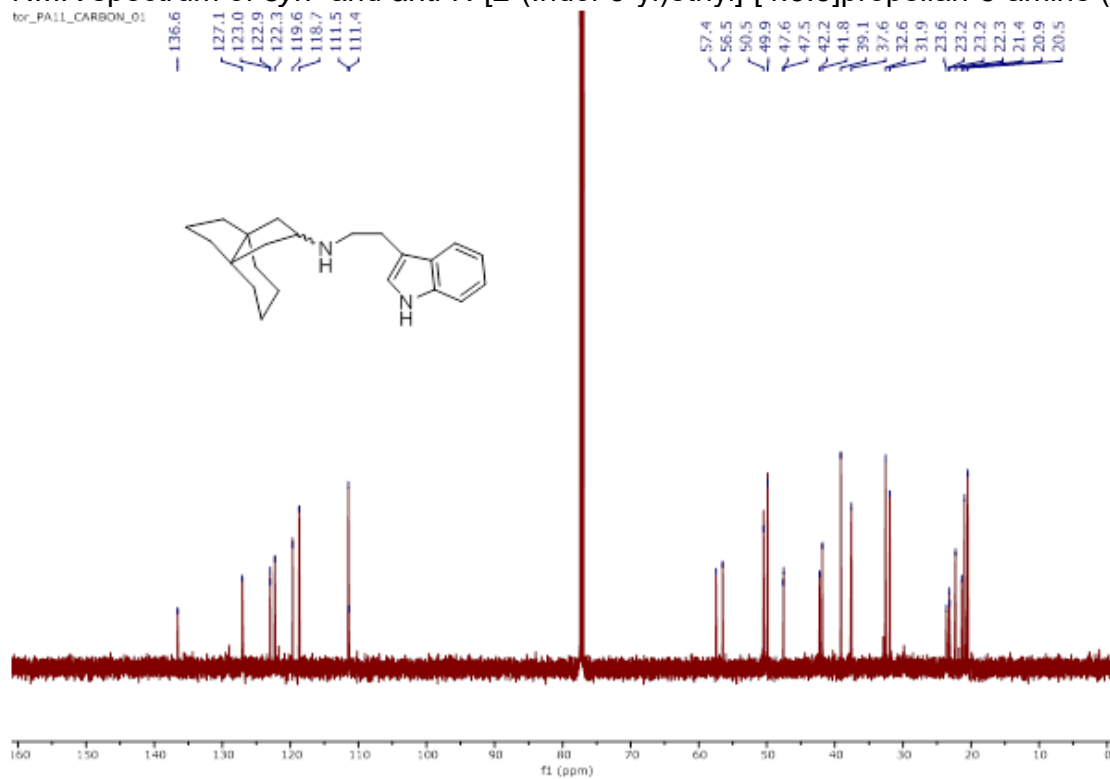

$^1\text{H}$  NMR spectrum of *syn*- and *anti*-N-(4-(Dimethylaminobenzyl)-[4.3.3]propellan-8-amine (17)

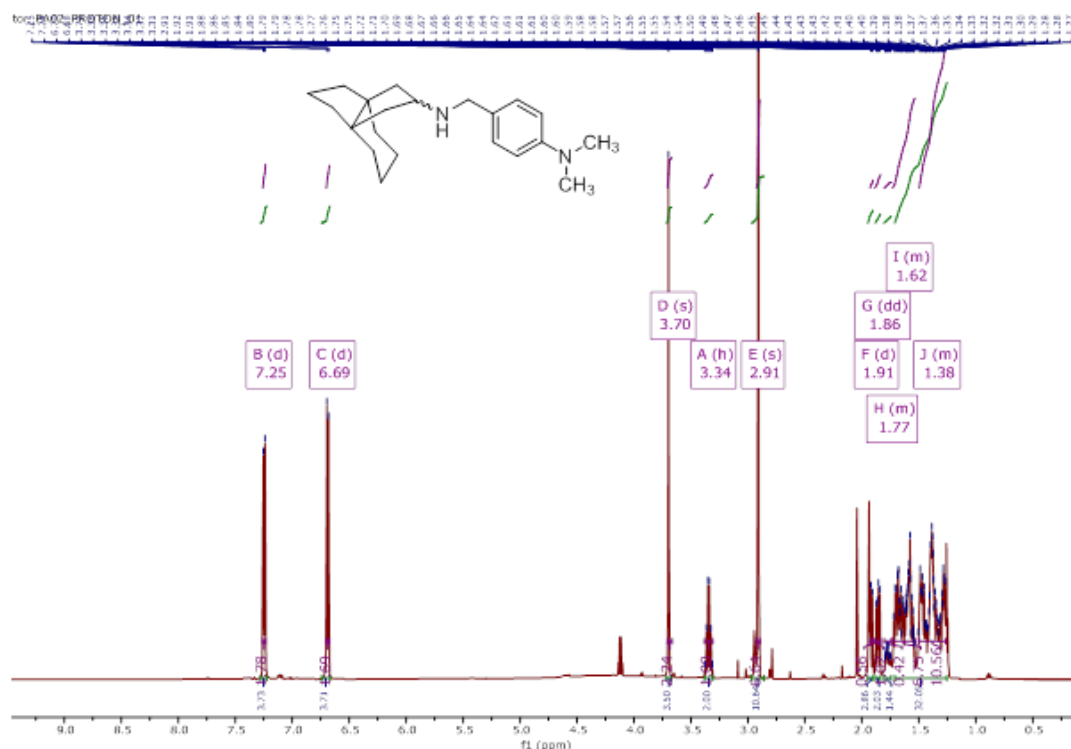

$^{13}\text{C}$  NMR spectrum of *syn*- and *anti*-N-(4-(Dimethylaminobenzyl)-[4.3.3]propellan-8-amine (17)

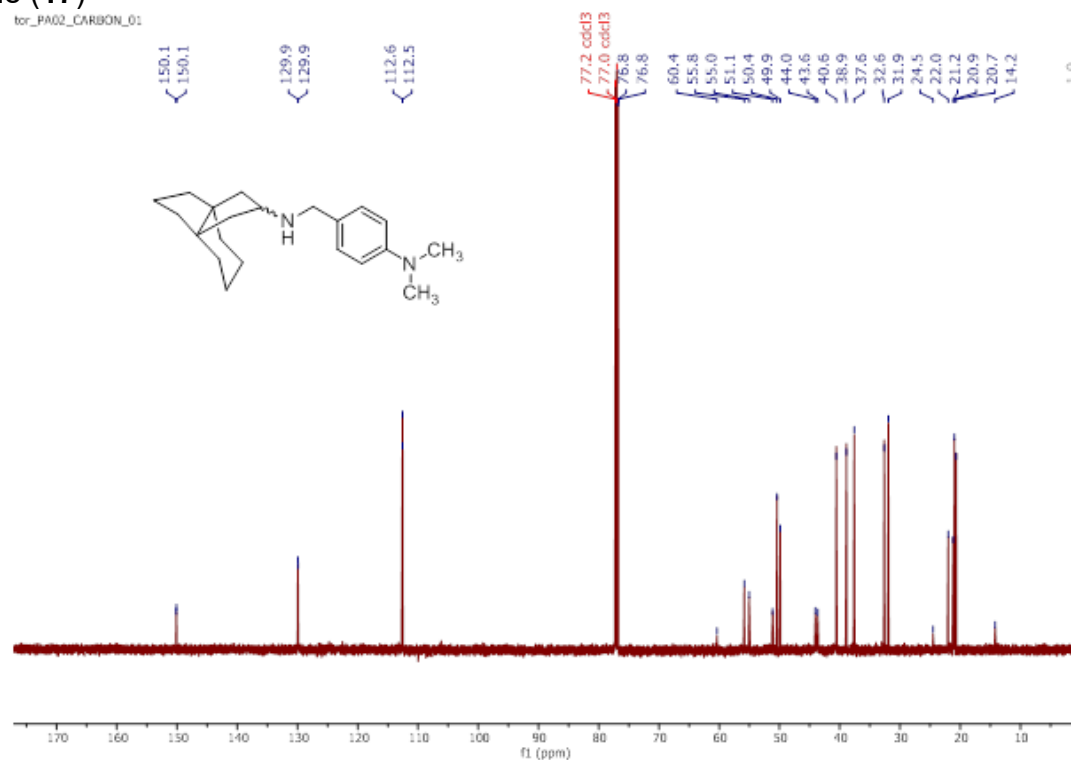

<sup>1</sup>H NMR spectrum of *syn*- and *anti*-N-cyclohexylmethyl-[4.3.3]propellan-8-amine (**18**)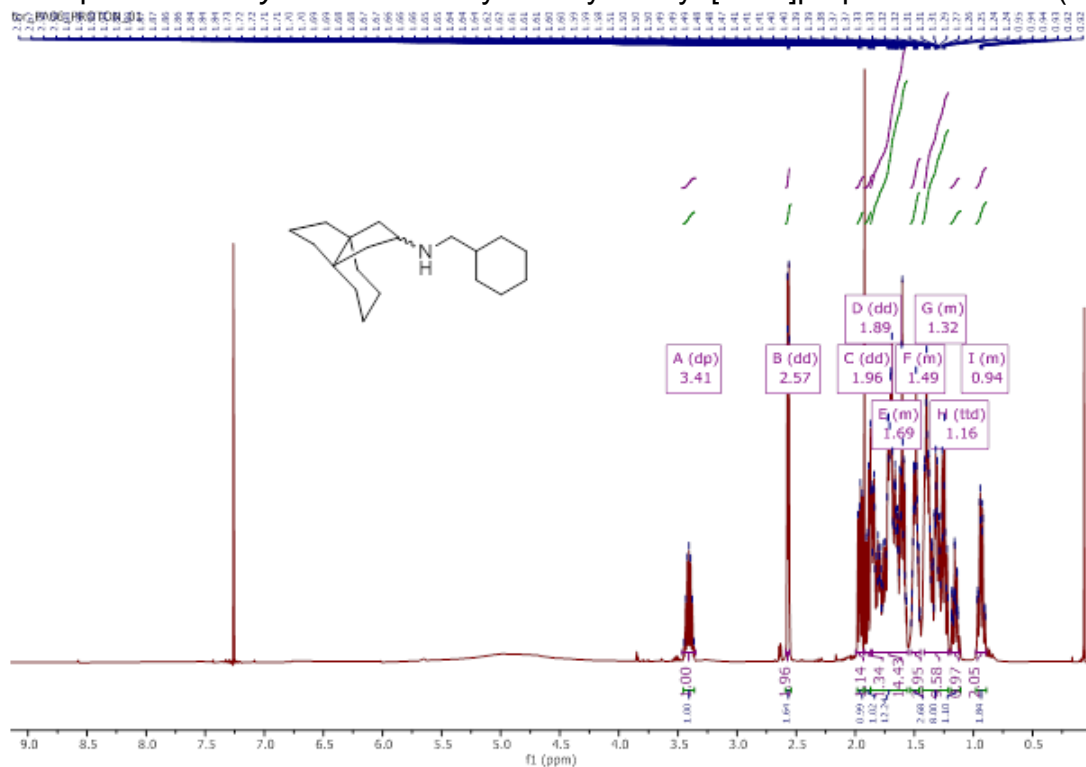<sup>13</sup>C NMR spectrum of *syn*- and *anti*-N-cyclohexylmethyl-[4.3.3]propellan-8-amine (**18**)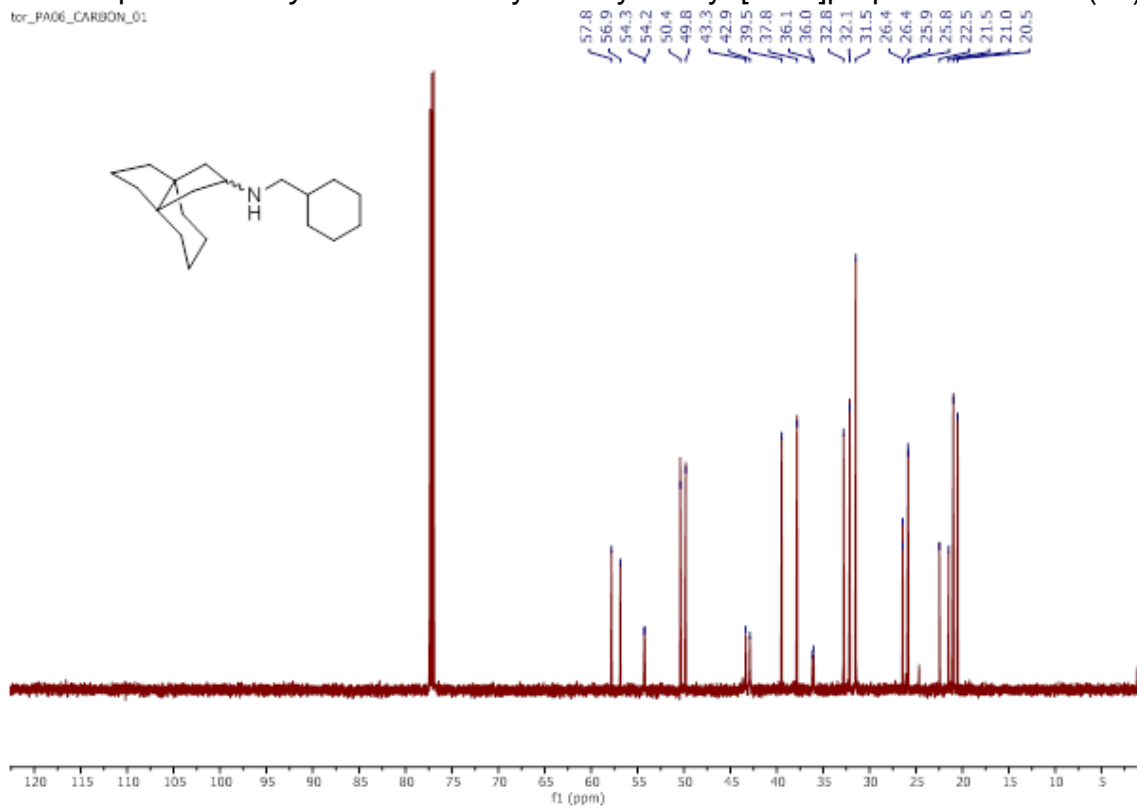

<sup>1</sup>H NMR spectrum of 11-syn-11-Benzylamino[4.3.3]propellan-11-one (*syn*-**20**)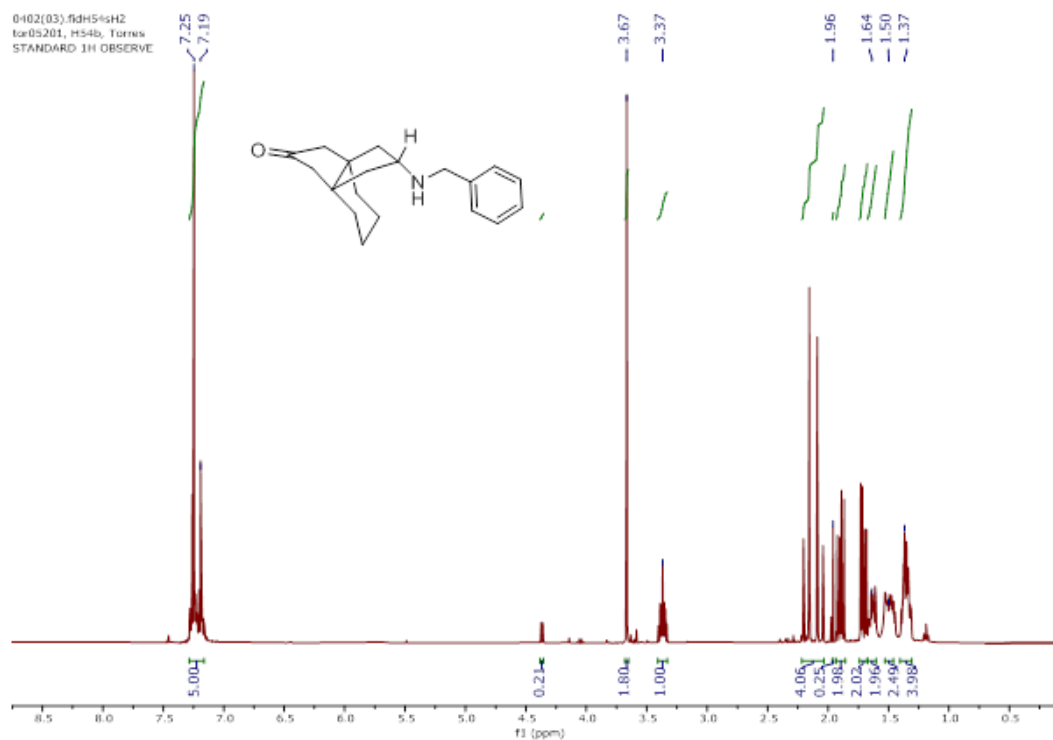<sup>13</sup>C NMR spectrum of 11-syn-11-Benzylamino[4.3.3]propellan-11-one (*syn*-**20**)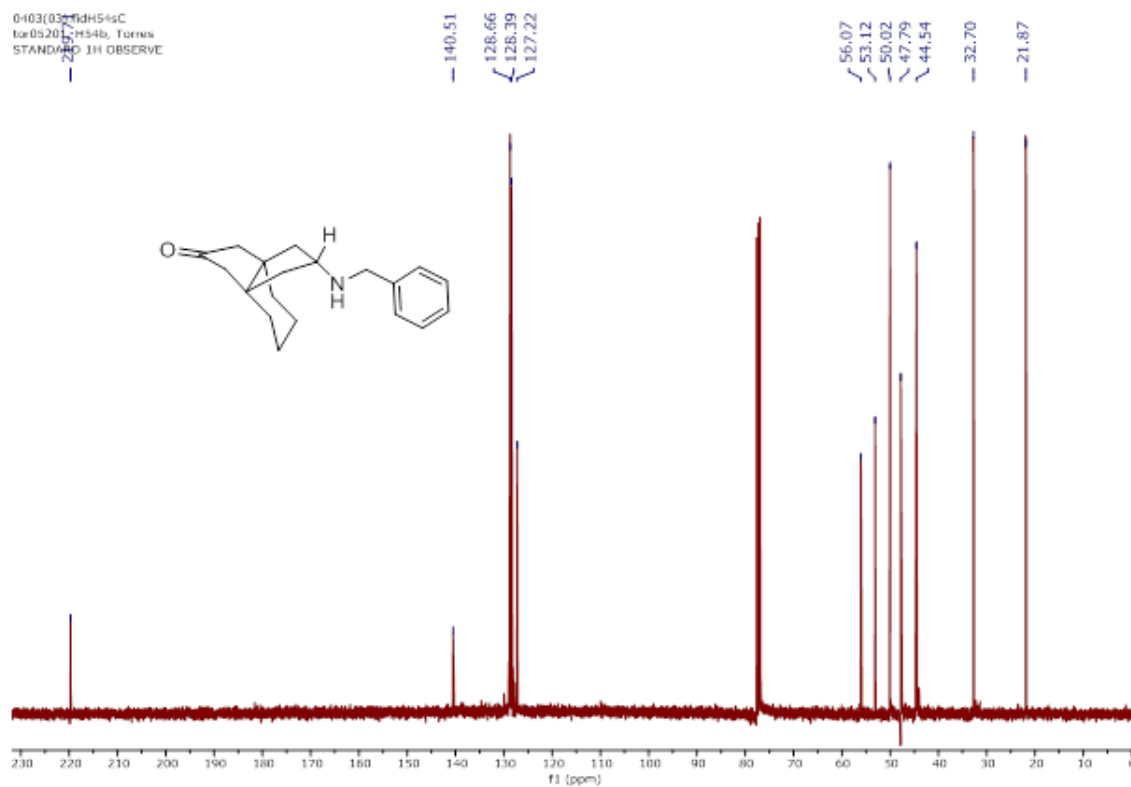

<sup>1</sup>H NMR spectrum of 11-*anti*-11-Benzylamino[4.3.3]propellan-8-one (*anti*-20)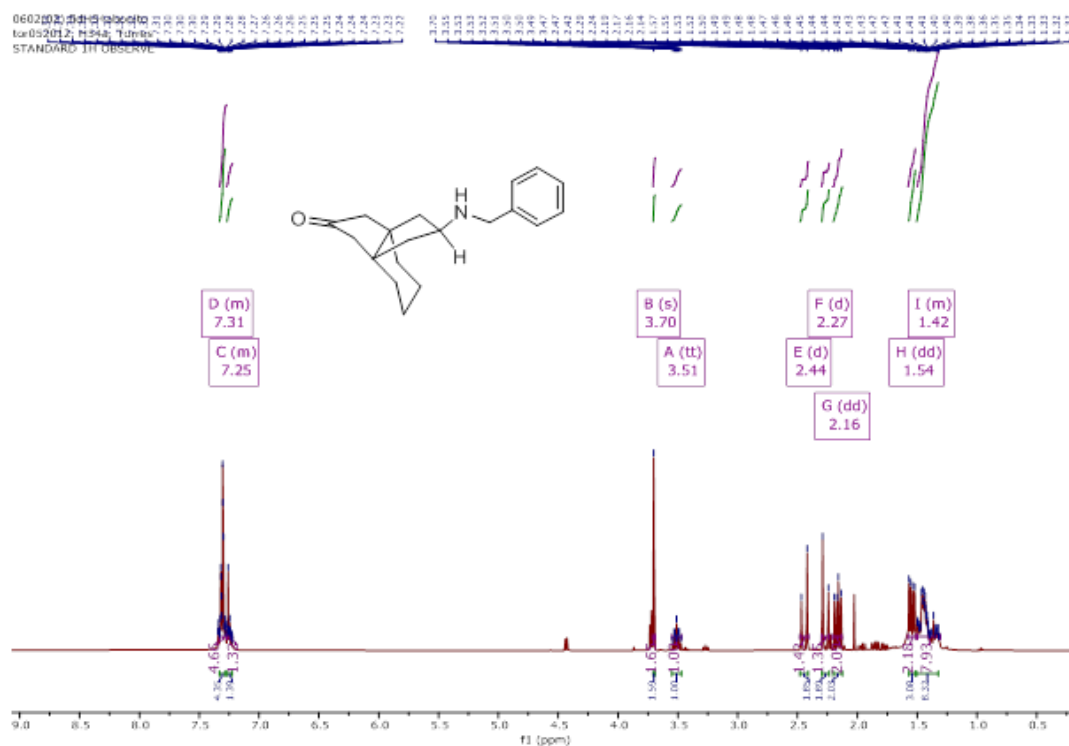<sup>13</sup>C NMR spectrum of 11-*anti*-11-Benzylamino[4.3.3]propellan-8-one (*anti*-20)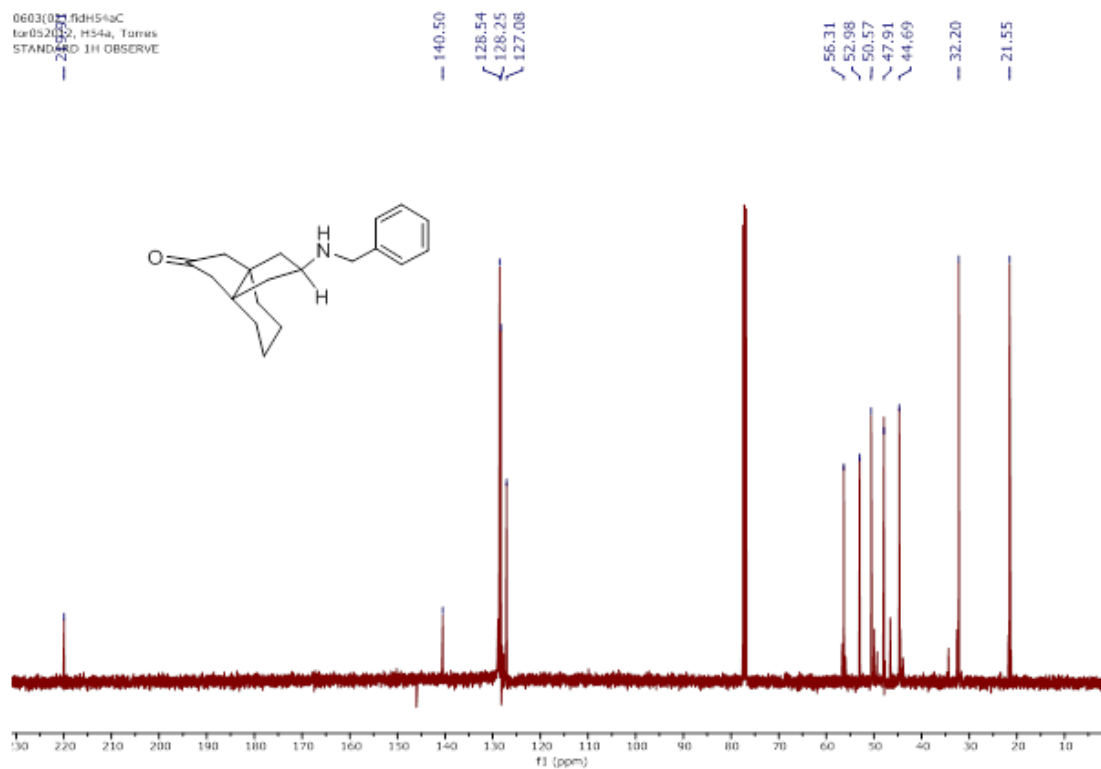

<sup>1</sup>H NMR spectrum of 1-Benzyl-3-(2-Methoxy-5-methylphenyl)-1-(*syn*-11-oxo-[4.3.3]propellan-8-yl)urea (*syn*-**21**)

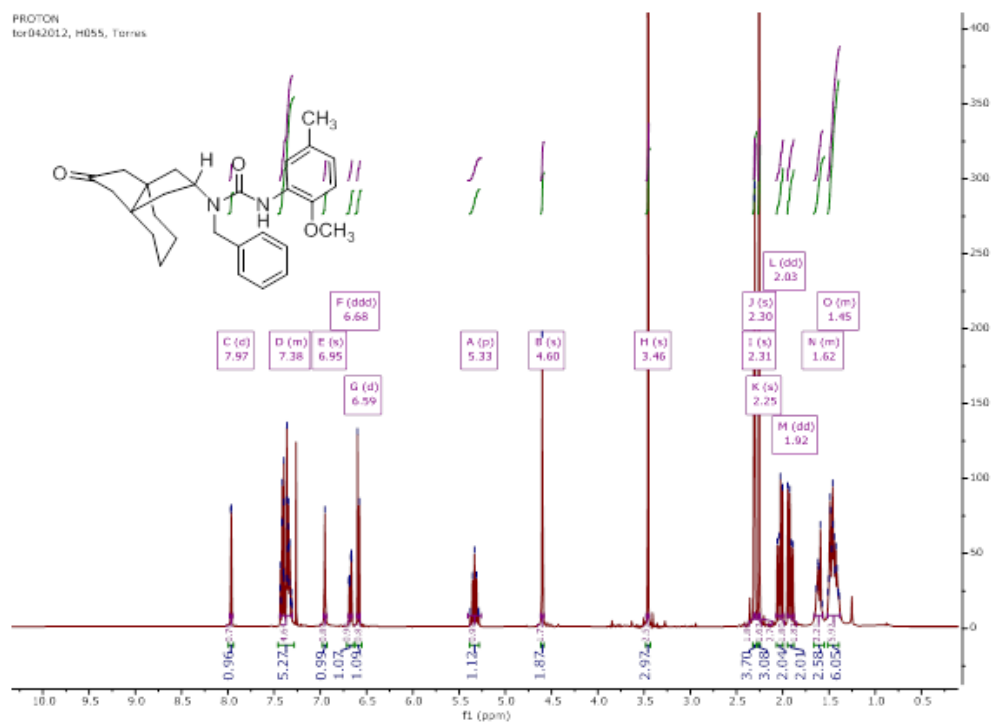

<sup>13</sup>C NMR spectrum of 1-Benzyl-3-(2-Methoxy-5-methylphenyl)-1-(*syn*-11-oxo-[4.3.3]propellan-8-yl)urea (*syn*-**21**)

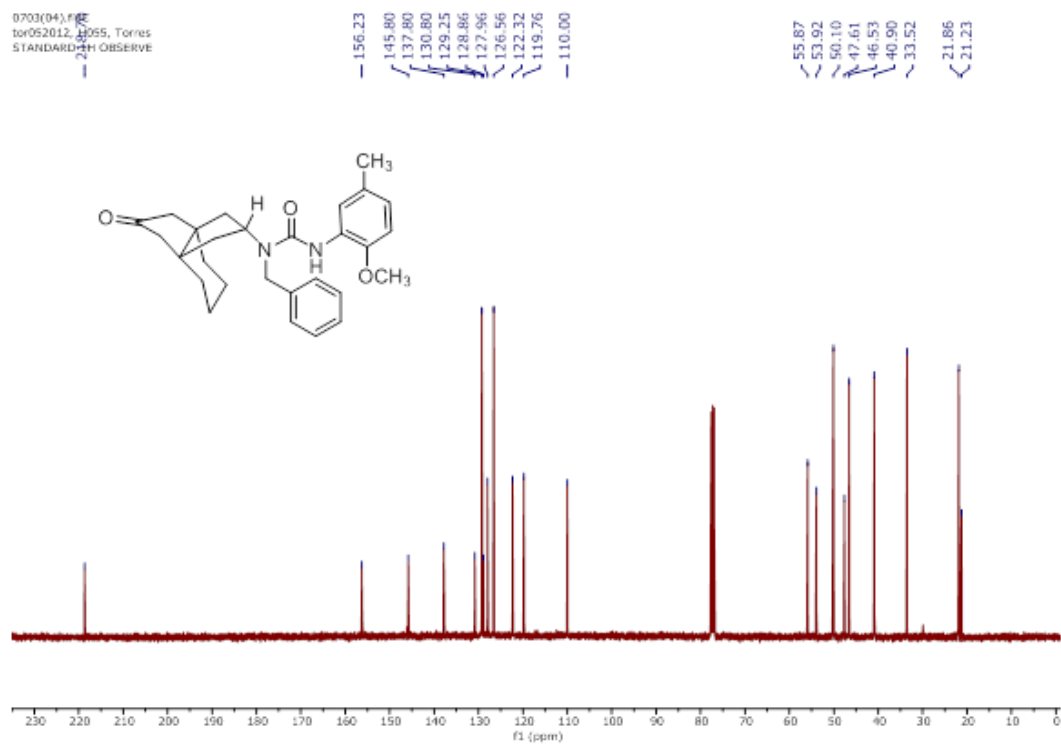

$^1\text{H}$  NMR spectrum of 1-Benzyl-3-(2-Methoxy-5-methylphenyl)-1-(*anti*-11-oxo-[4.3.3]propellan-8-yl)urea (*anti*-**21**)

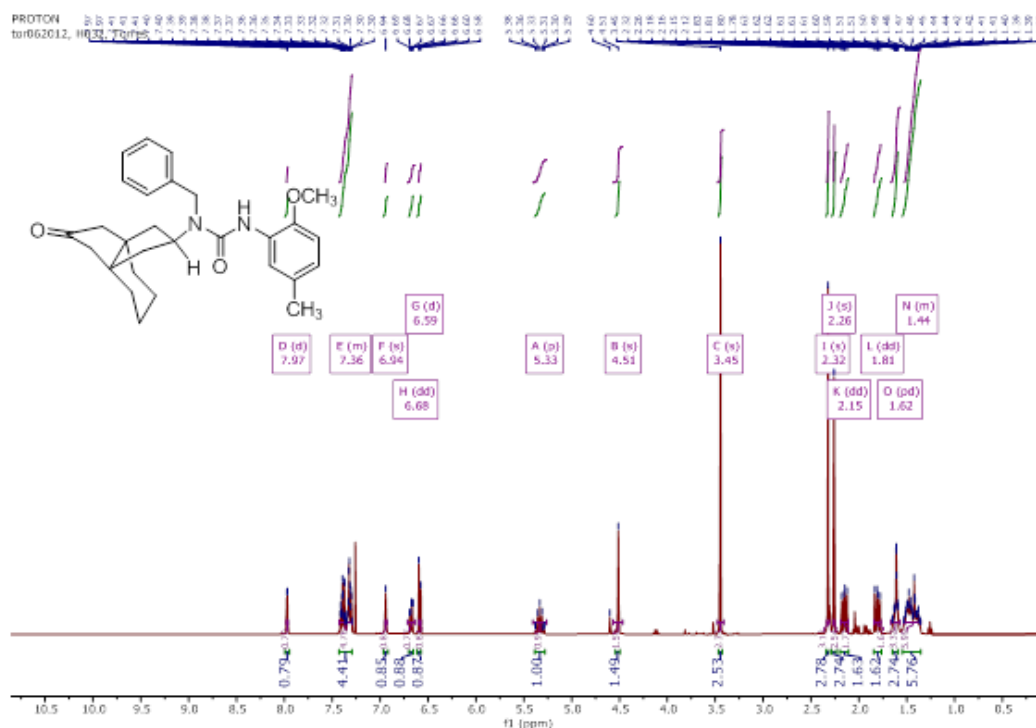

$^{13}\text{C}$  NMR spectrum of 1-Benzyl-3-(2-Methoxy-5-methylphenyl)-1-(*anti*-11-oxo-[4.3.3]propellan-8-yl)urea (*anti*-**21**)

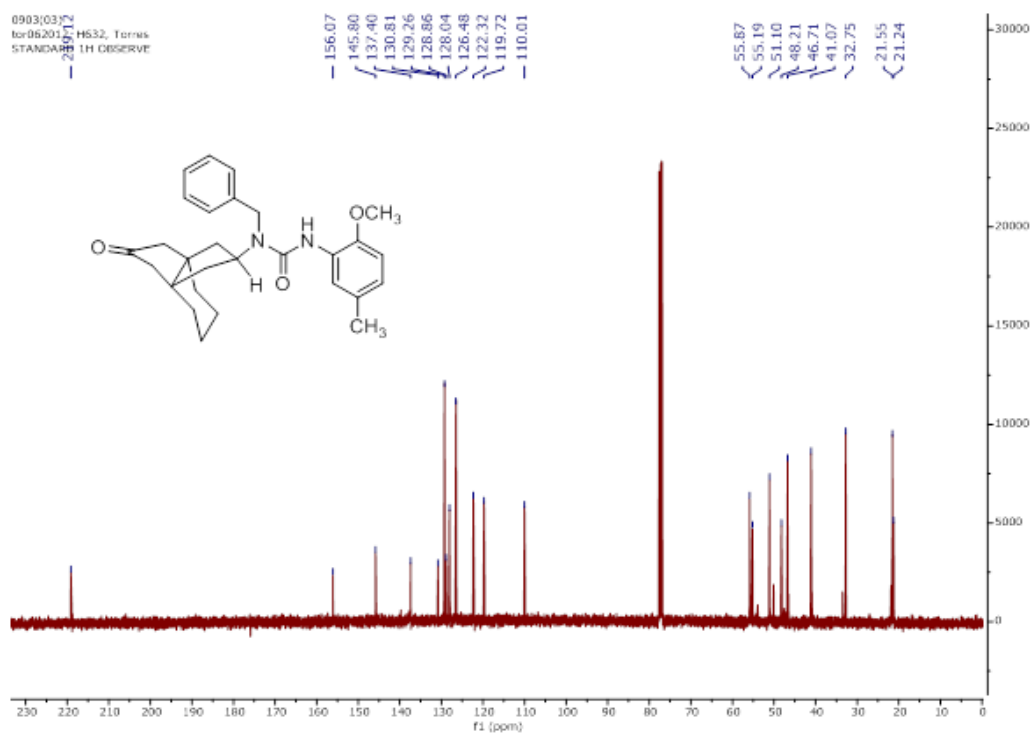



S121

$^1\text{H}$  NMR spectrum of 1-Benzyl-1-[(8-*syn*, 11-*anti*)-11-hydroxy[4.3.3]propellan-8yl]-3-(2-methoxy-5-methylphenyl)urea(*syn,anti*-**22**)

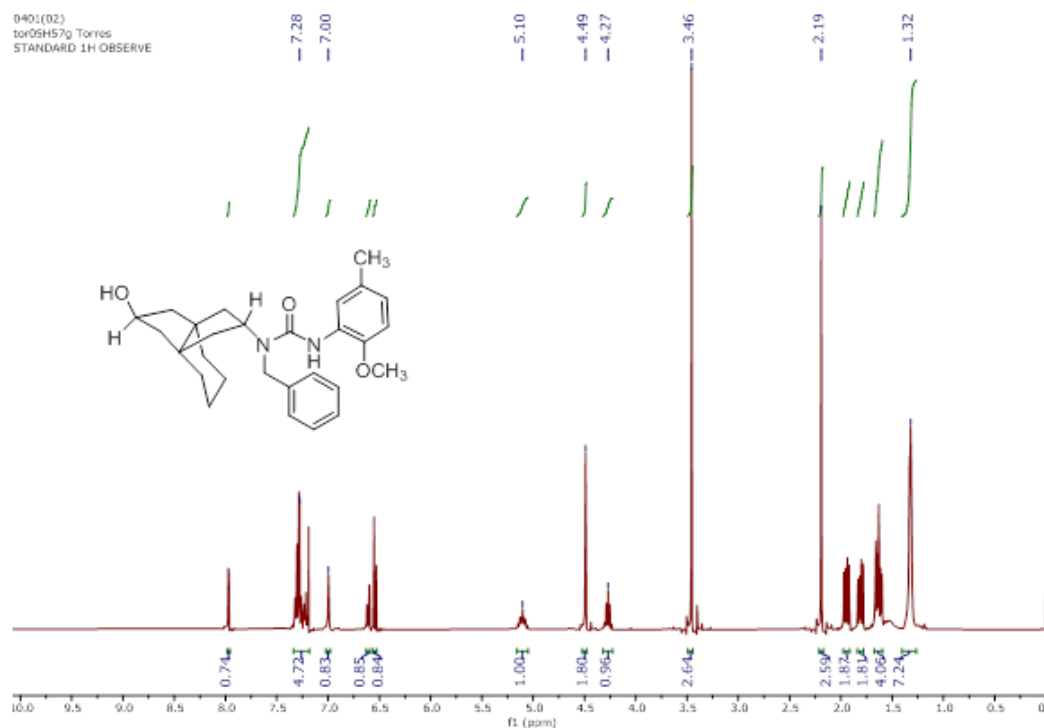

$^{13}\text{C}$  NMR spectrum of 1-Benzyl-1-[(8-*syn*, 11-*anti*)-11-hydroxy[4.3.3]propellan-8yl]-3-(2-methoxy-5-methylphenyl)urea(*syn,anti*-**22**)

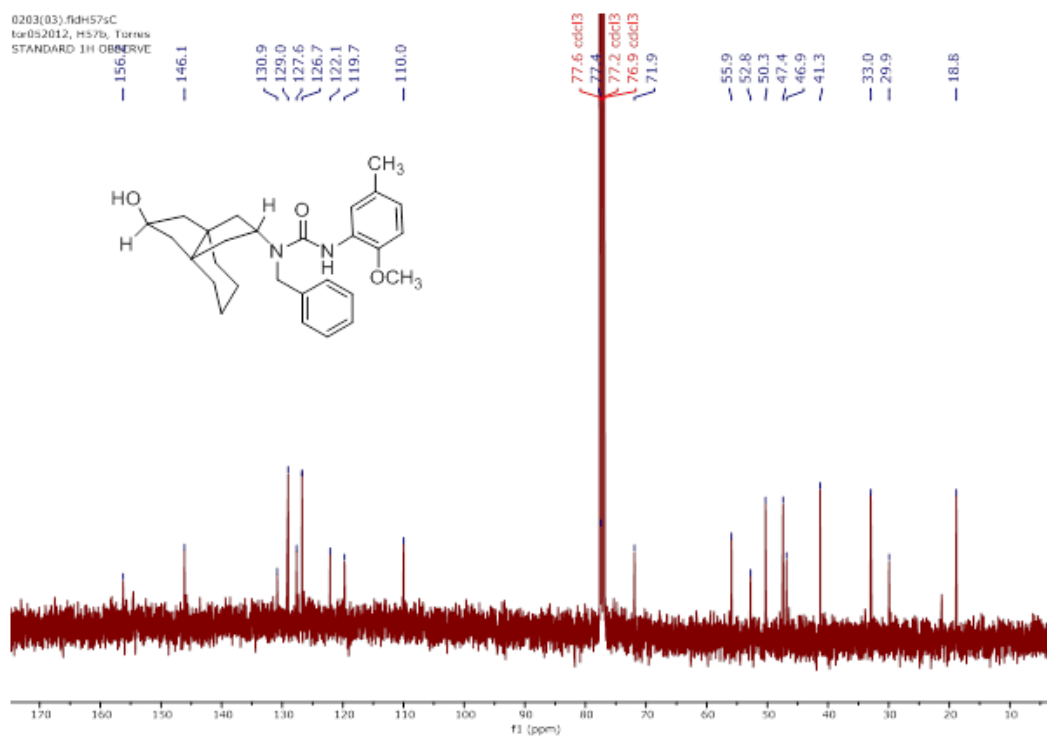

$^1\text{H}$  NMR spectrum of 1-benzyl-1-[(8-*syn*, 11-*syn*)-11-hydroxy[4.3.3]propellan-8yl)]-3-(2-methoxy-5-methylphenyl)urea (*syn, syn*-**22**)

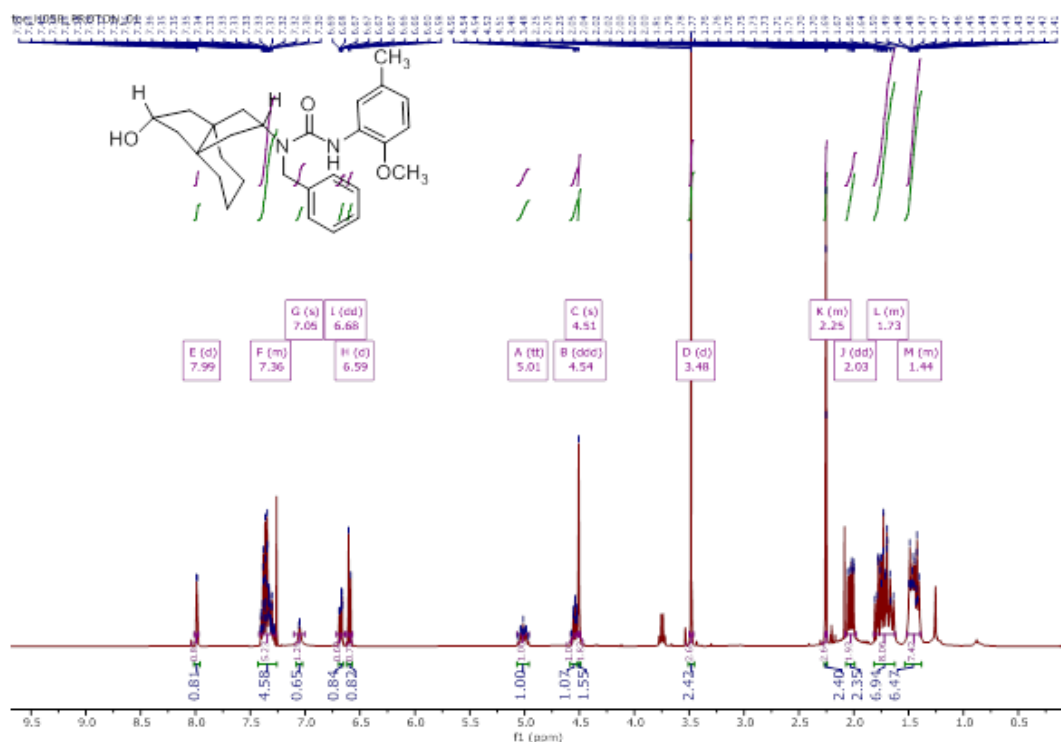

$^{13}\text{C}$  NMR spectrum of 1-benzyl-1-[(8-*syn*, 11-*syn*)-11-hydroxy[4.3.3]propellan-8yl)]-3-(2-methoxy-5-methylphenyl)urea (*syn, syn*-**22**)

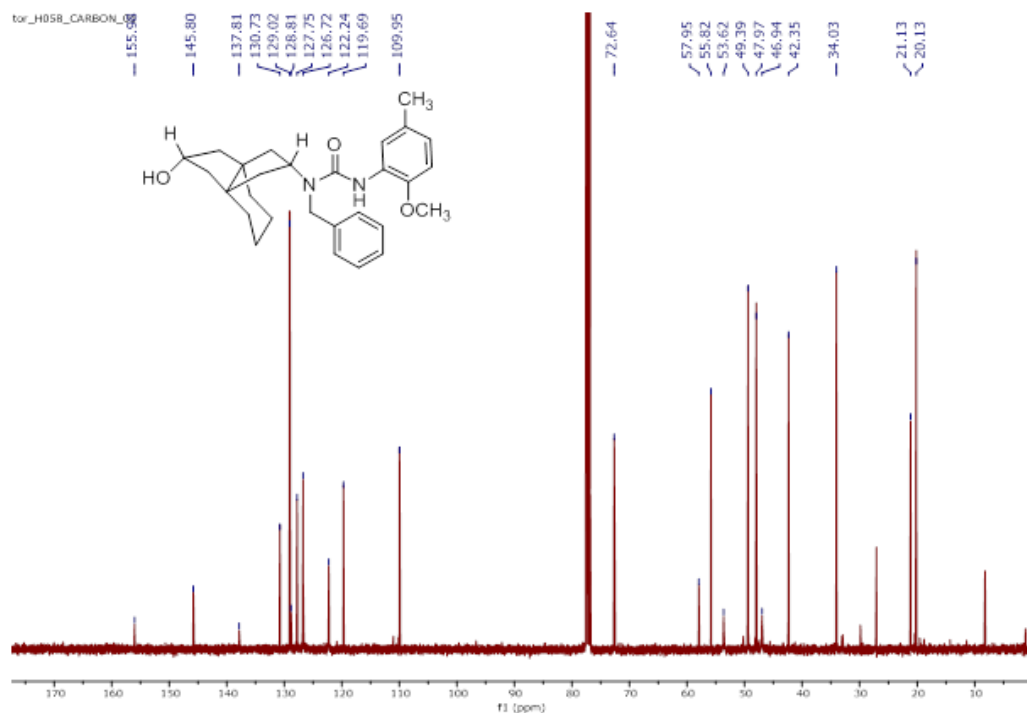

$^1\text{H}$  NMR spectrum of 1-Benzyl-1-[(8-*anti*, 11-*anti*)-11-hydroxy[4.3.3]propellan-8yl]-3-(2-methoxy-5-methylphenyl)urea (*anti,anti*-**22**)

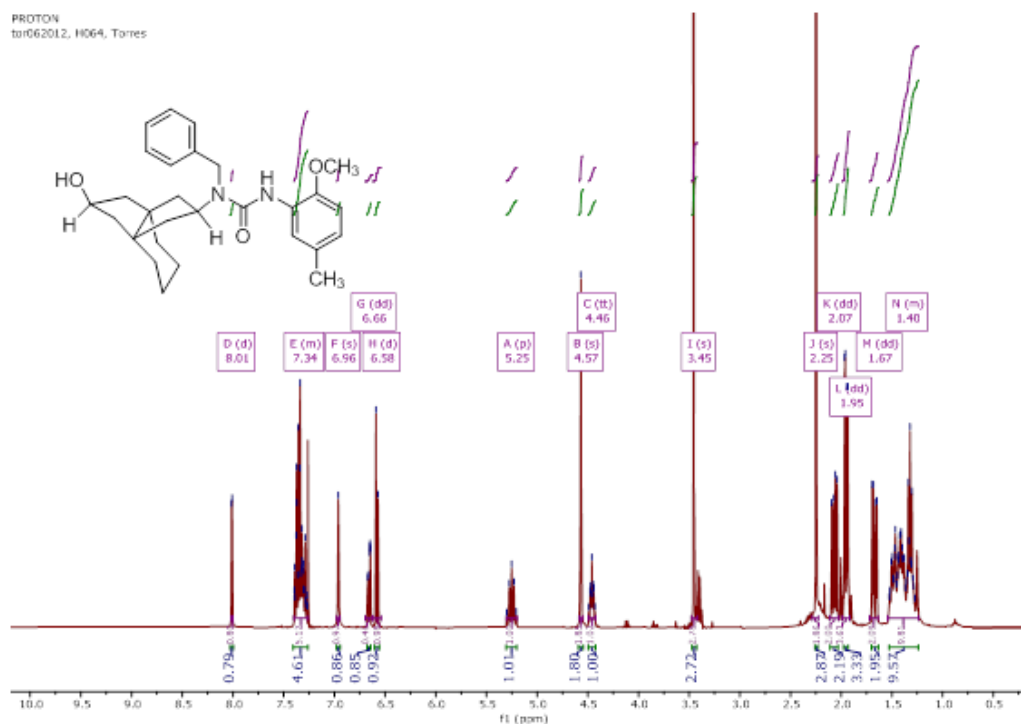

$^{13}\text{C}$  NMR spectrum of 1-Benzyl-1-[(8-*anti*, 11-*anti*)-11-hydroxy[4.3.3]propellan-8yl]-3-(2-methoxy-5-methylphenyl)urea (*anti,anti*-**22**)

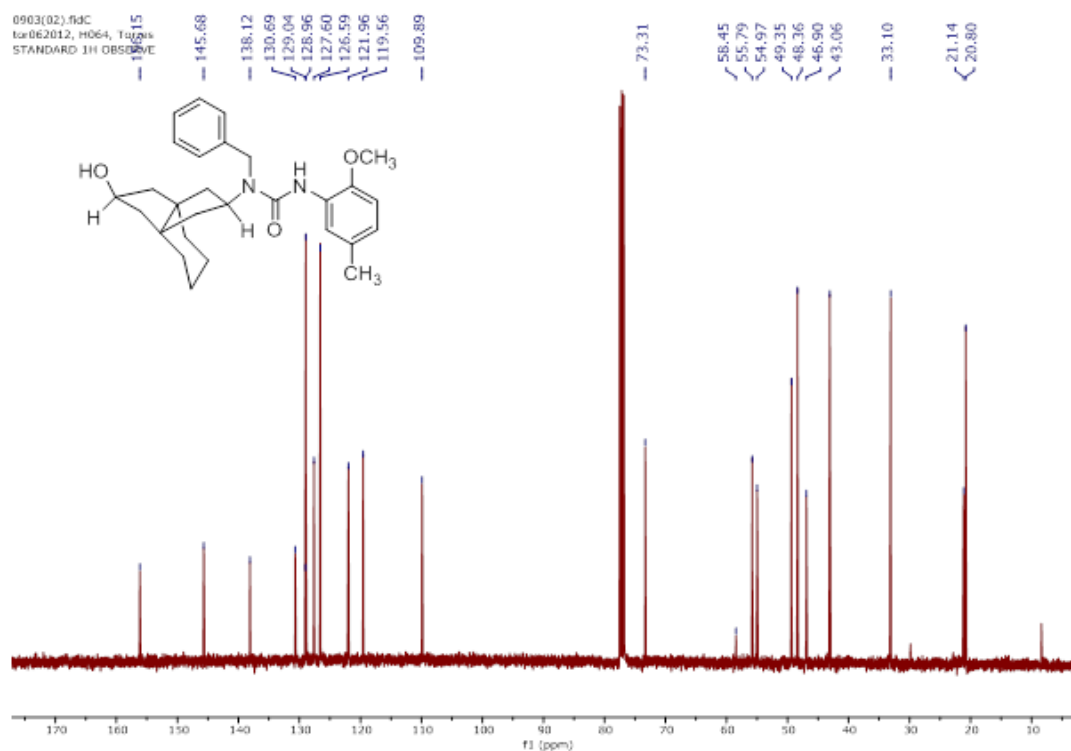

$^1\text{H}$  NMR spectrum of 1-benzyl-1-[(8-syn, 11-*anti*)-11-hydroxy[4.3.3]propellan-8yl]-3-(2-methoxy-5-methylphenyl)urea (*anti*,*syn*-**22**)

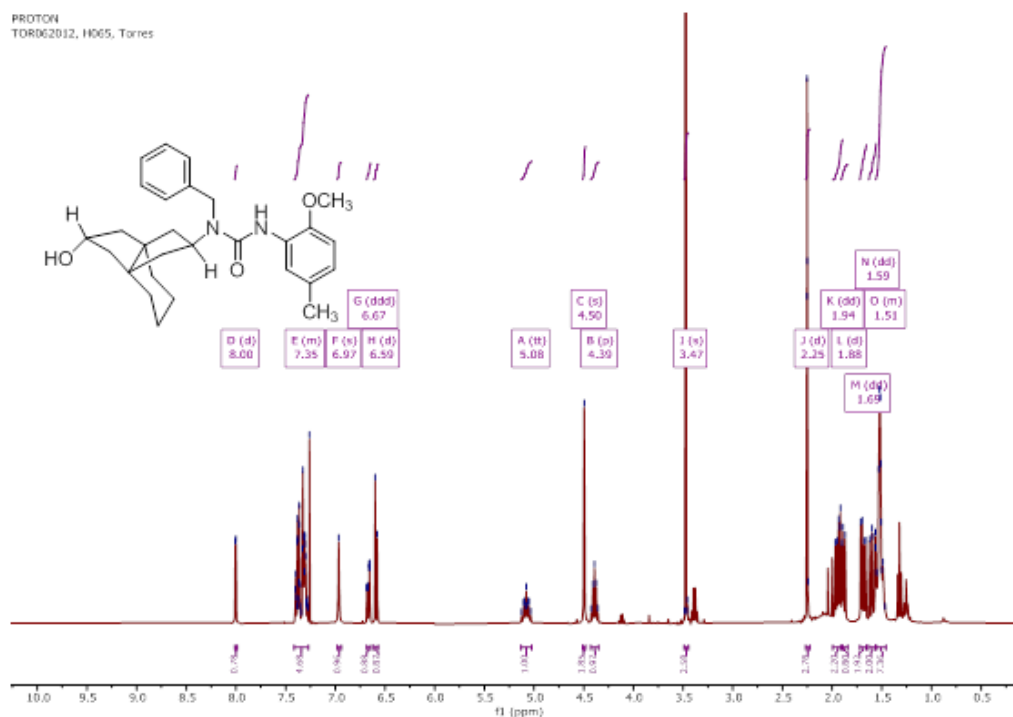

$^{13}\text{C}$  NMR spectrum of 1-benzyl-1-[(8-syn, 11-*anti*)-11-hydroxy[4.3.3]propellan-8yl]-3-(2-methoxy-5-methylphenyl)urea (*anti*,*syn*-**22**)

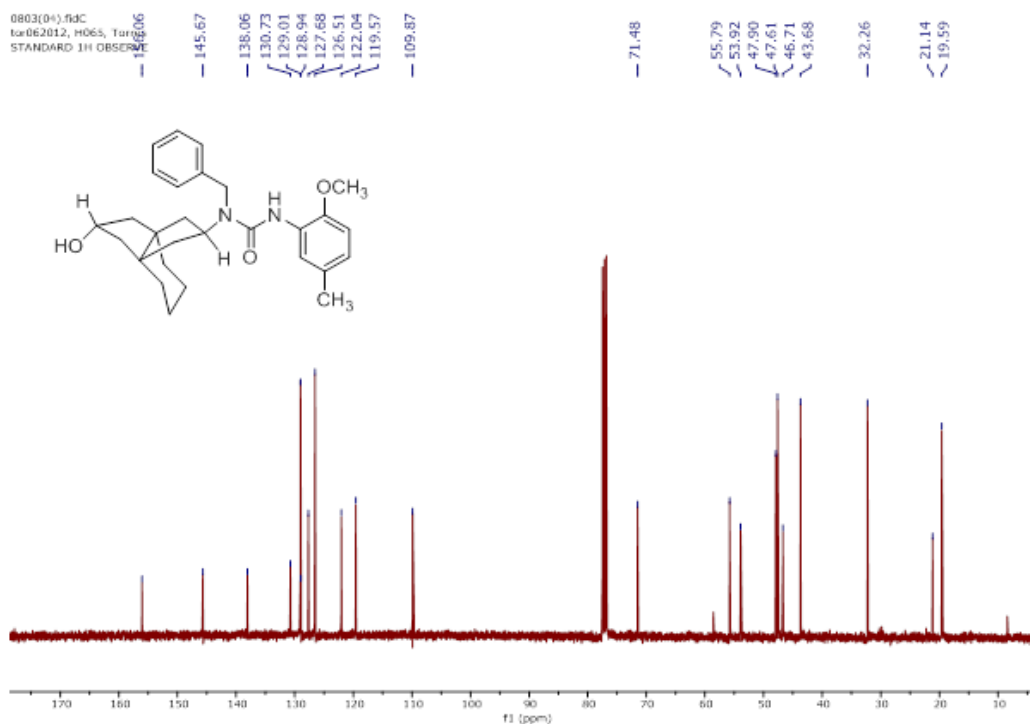

<sup>1</sup>H NMR spectrum of 1-Phenyl-3-(*syn* and *anti*-[4.3.3]propellan-8-yl)urea (**23a**)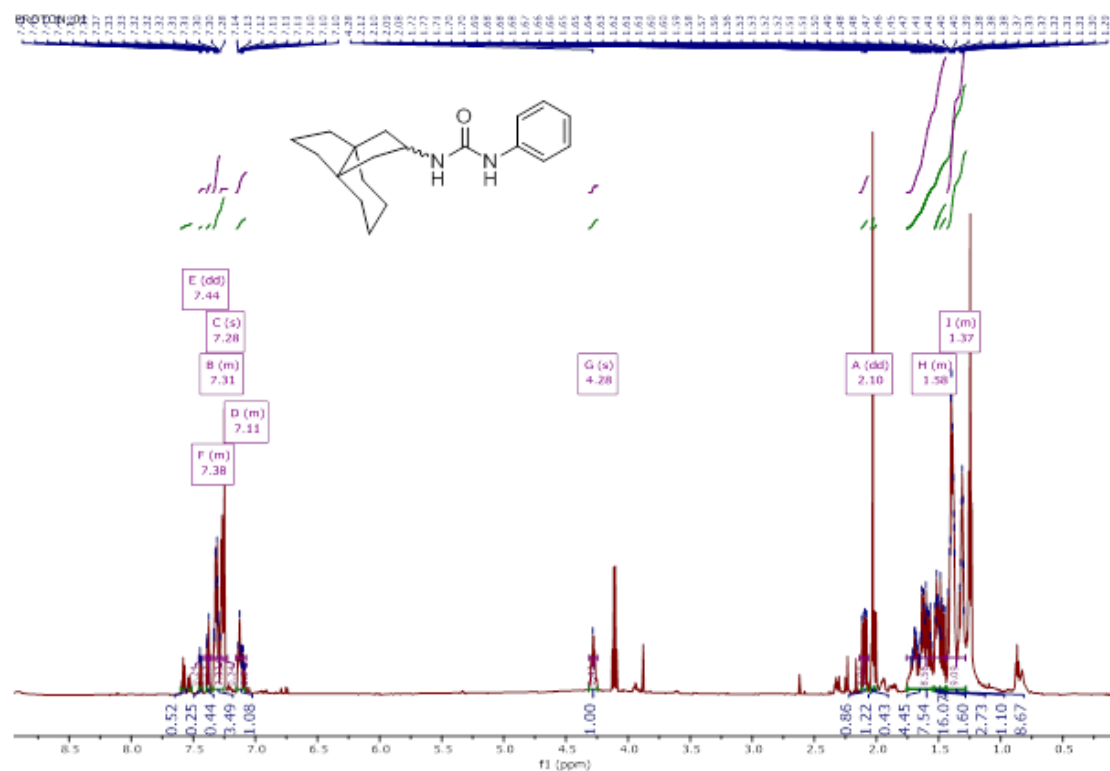<sup>13</sup>C NMR spectrum of 1-Phenyl-3-(*syn* and *anti*-[4.3.3]propellan-8-yl)urea (**23a**)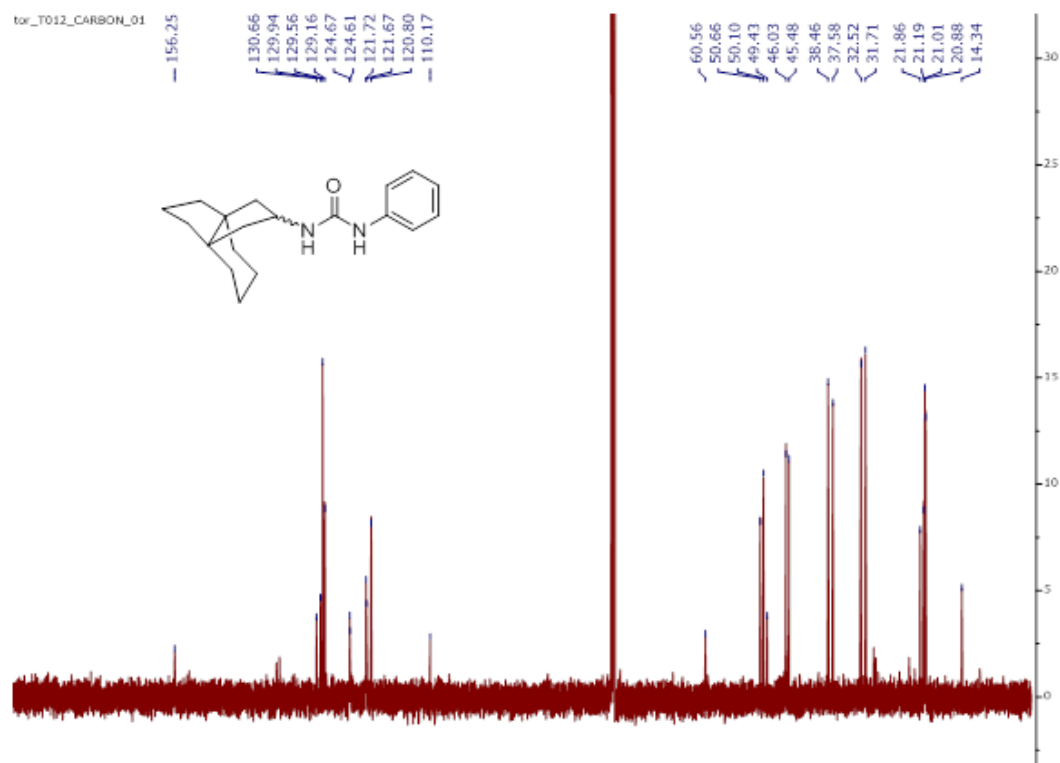

<sup>1</sup>H NMR spectrum of 1-Cyclohexyl-3-(*syn* and *anti*-[4.3.3]propellan-8-yl)urea (**23b**)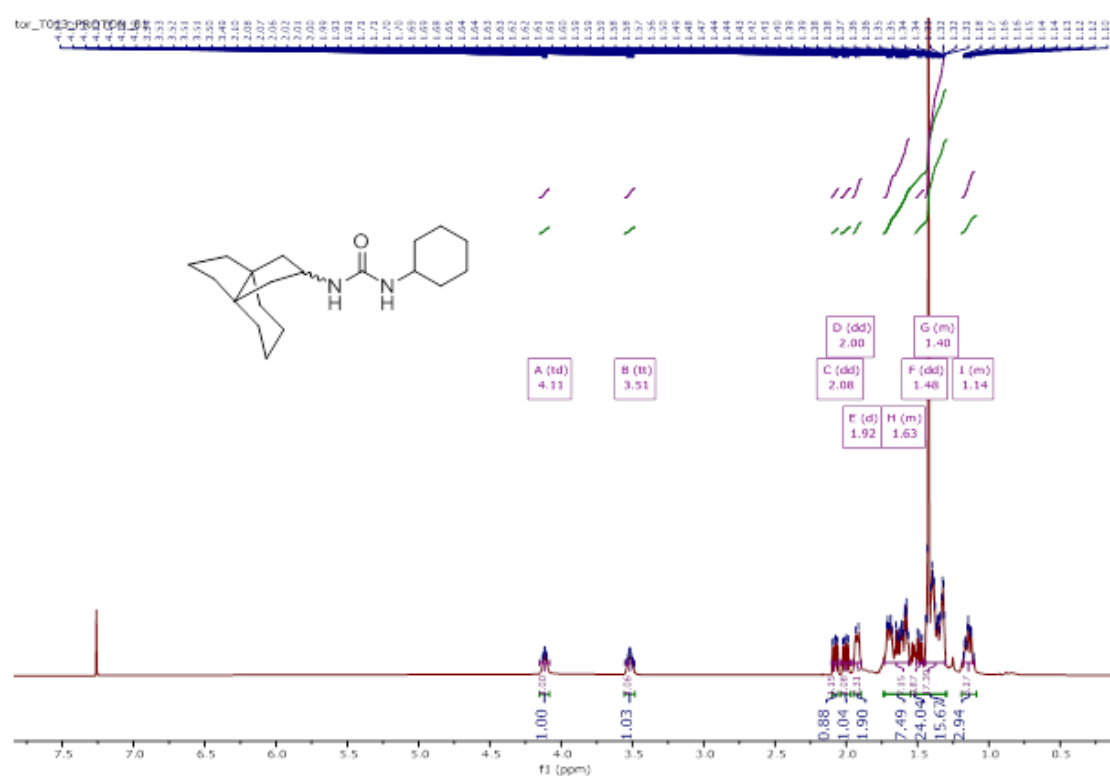<sup>13</sup>C NMR spectrum of 1-Cyclohexyl-3-(*syn* and *anti*-[4.3.3]propellan-8-yl)urea (**23b**)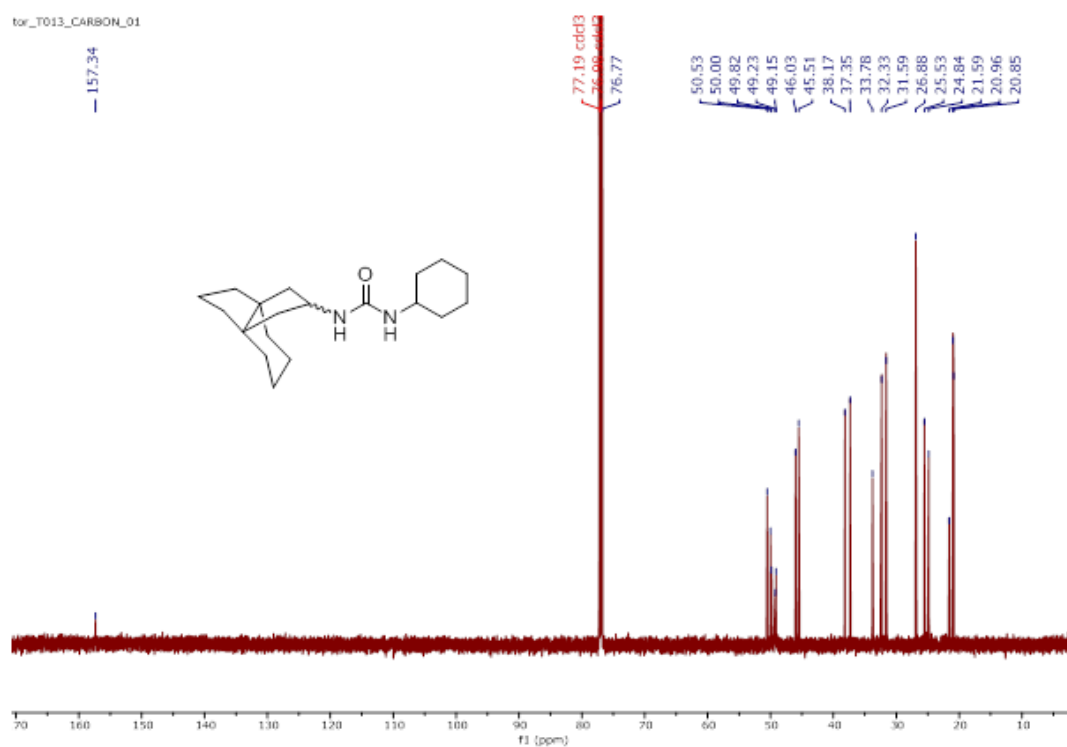

$^1\text{H}$  NMR spectrum of 1-(2-Methoxy-5-methylphenyl)-3-(*syn* and *anti*-[4.3.3]propellan-8-yl)urea (**23c**)

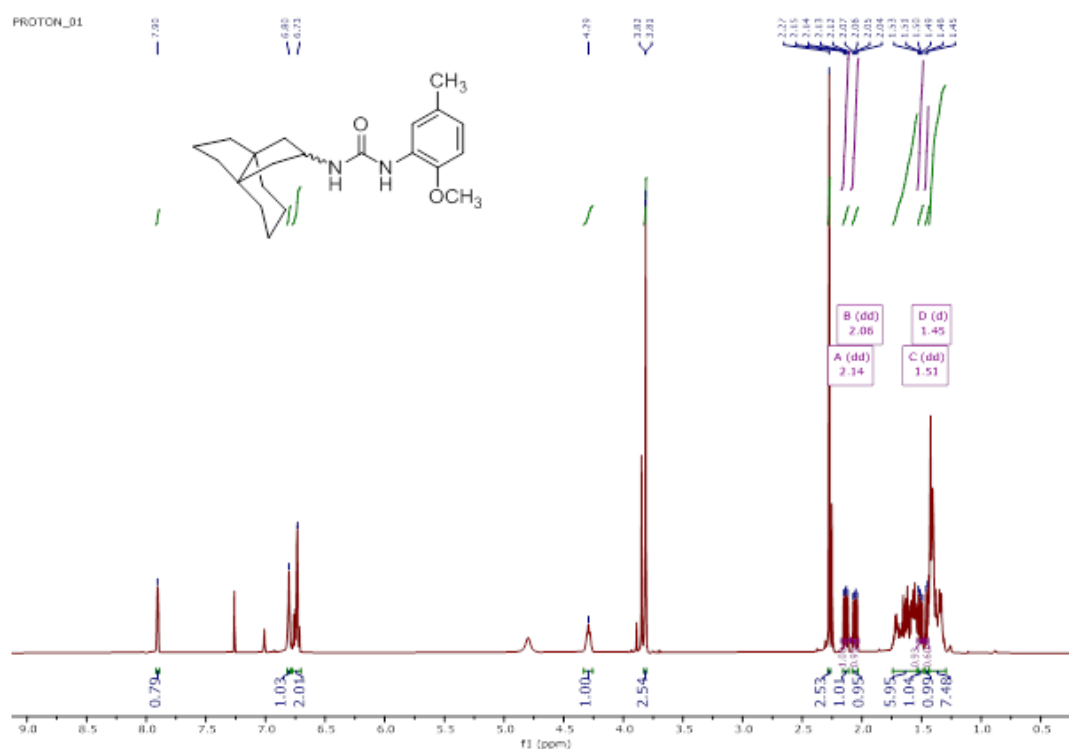

$^{13}\text{C}$  NMR spectrum of 1-(2-Methoxy-5-methylphenyl)-3-(*syn* and *anti*-[4.3.3]propellan-8-yl)urea (**23c**)

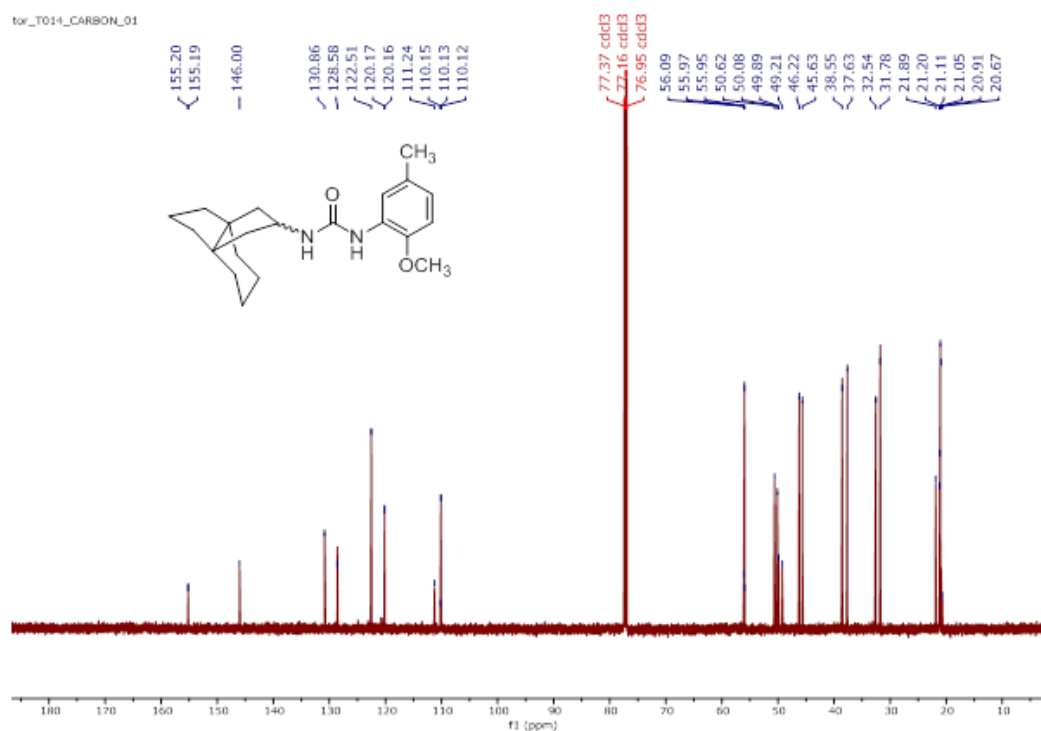

<sup>1</sup>H NMR spectrum of 1-(3,4-difluorophenyl)-3-(*syn* and *anti*-[4.3.3]propellan-8-yl)urea (**23d**)

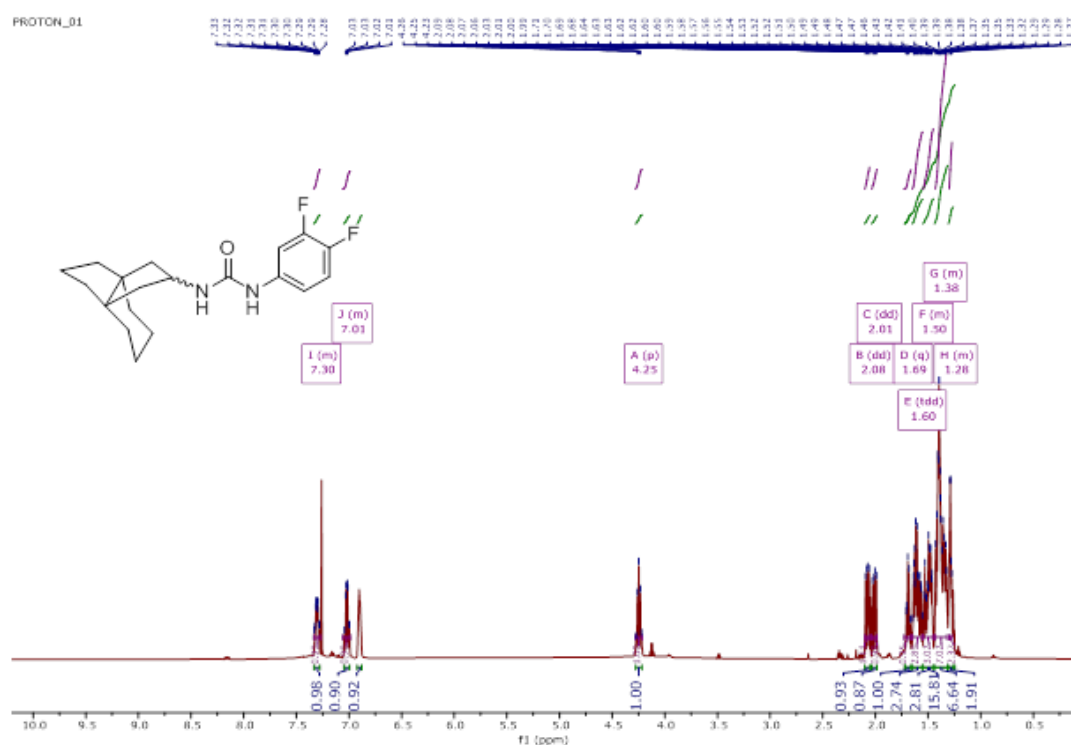

<sup>13</sup>C NMR spectrum of 1-(3,4-difluorophenyl)-3-(*syn* and *anti*-[4.3.3]propellan-8-yl)urea (**23d**)

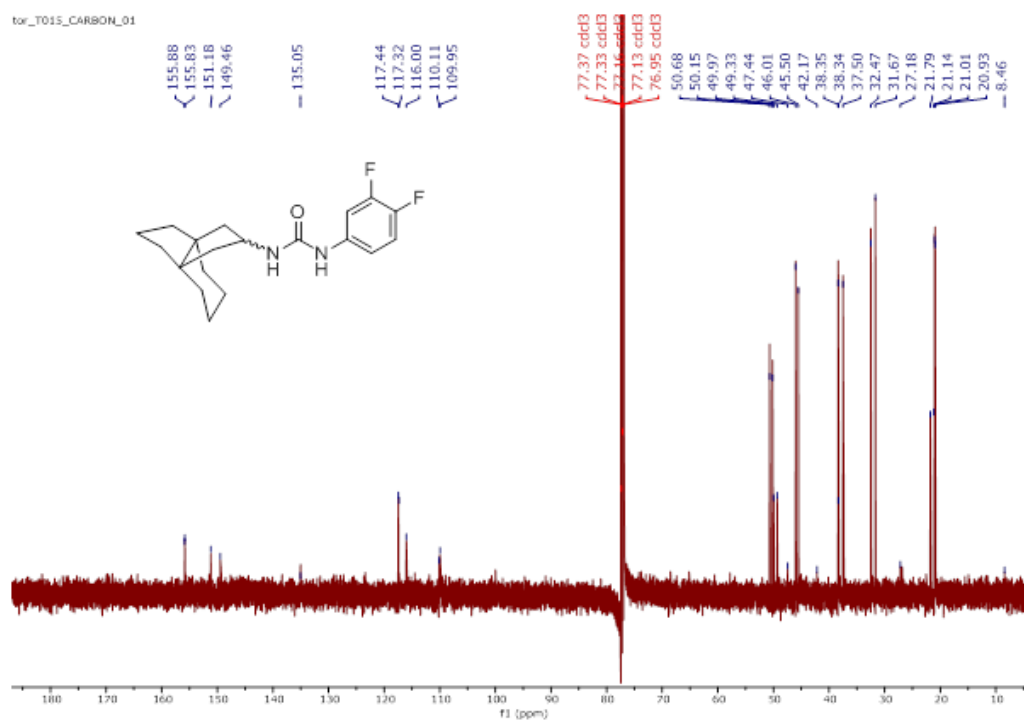



$^1\text{H}$  NMR spectrum of (11'-*syn* and 11'-*anti*)-Spiro ([1,3]-dioxolane-2,8'-[4.3.3]propellan)-11'-amine (**24**)

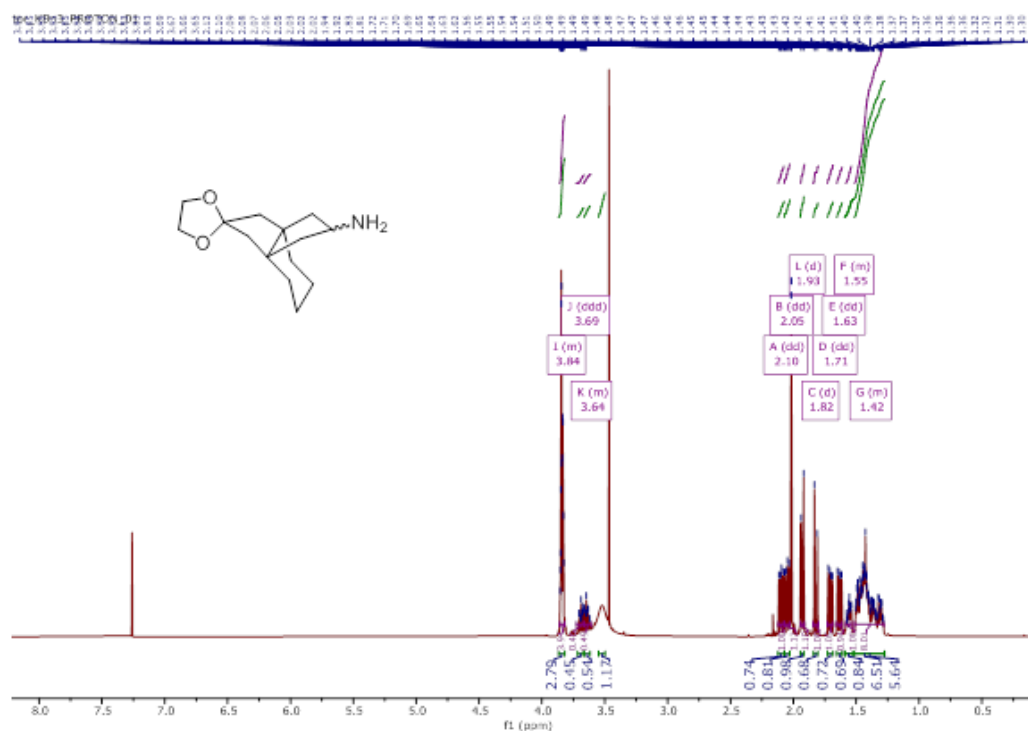

$^1\text{H}$  NMR spectrum of 1-(3,4-Difluorophenyl)-3-(8-*syn*-11-oxo[4.3.3]propellan-8-yl)urea (*syn*-**25**)

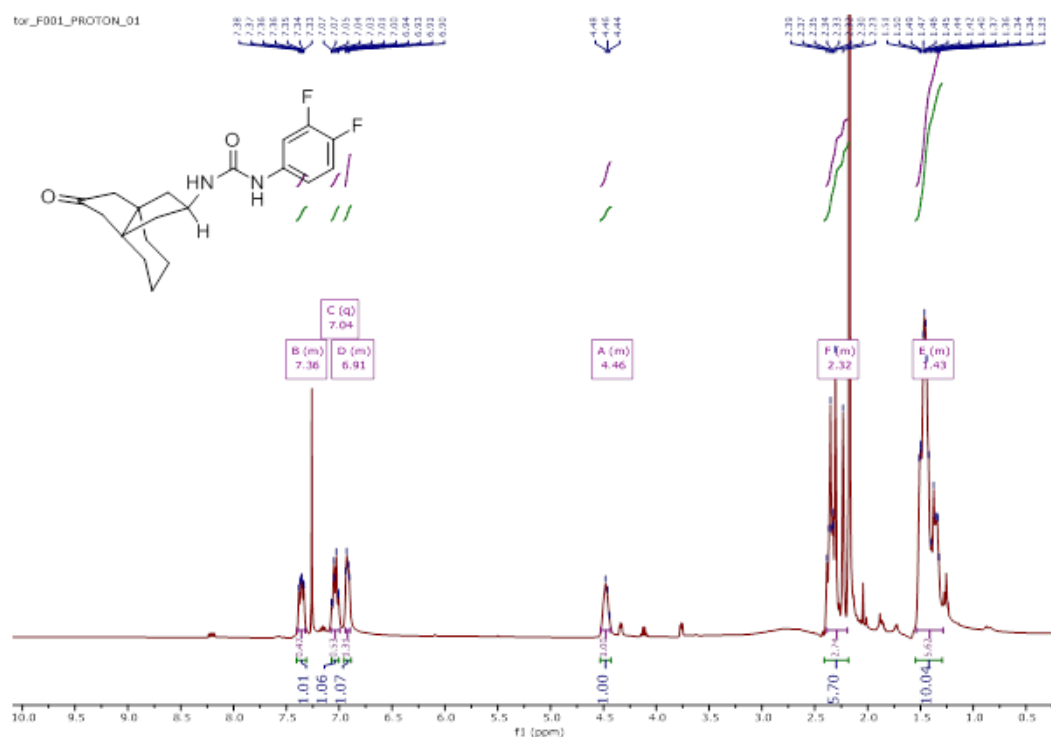

# S130

$^{13}\text{C}$  NMR spectrum of 1-(3,4-Difluorophenyl)-3-(8-*syn*-11-oxo[4.3.3]propellan-8-yl)urea (*syn*-**25**)

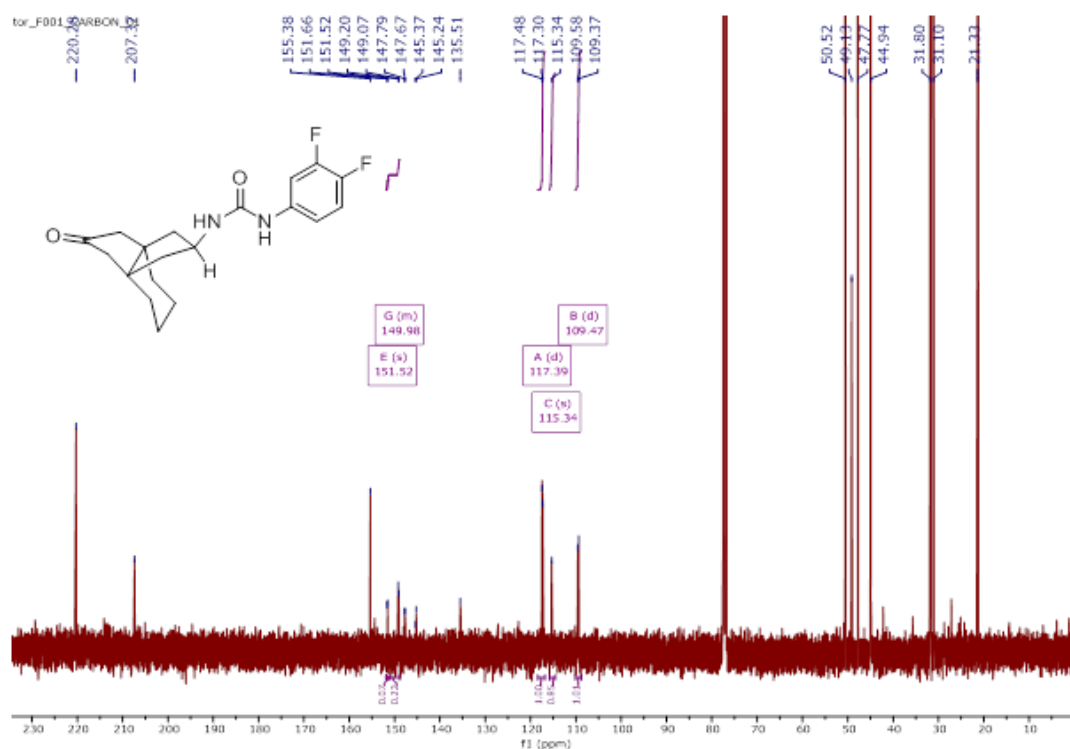

$^1\text{H}$  NMR spectrum of 1-(3,4-Difluorophenyl)-3-(8-*anti*-11-oxo[4.3.3]propellan-8-yl)urea (*anti*-**25**)

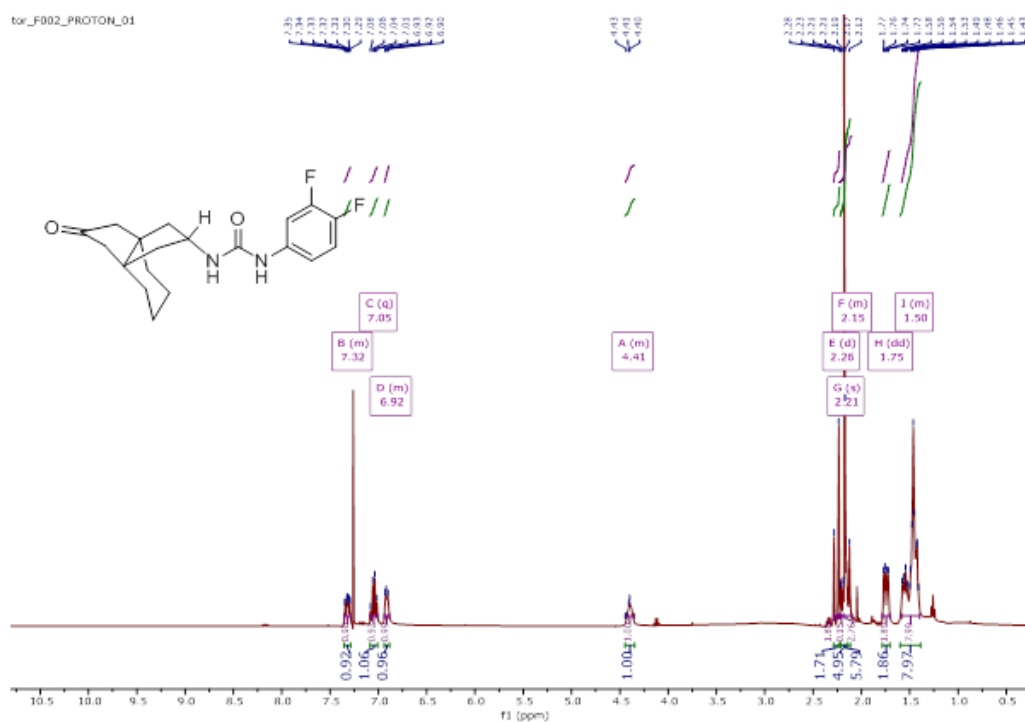

$^{13}\text{C}$  NMR spectrum of 1-(3,4-Difluorophenyl)-3-(8-*anti*-11-oxo[4.3.3]propellan-8-yl)urea (*anti*-**25**)

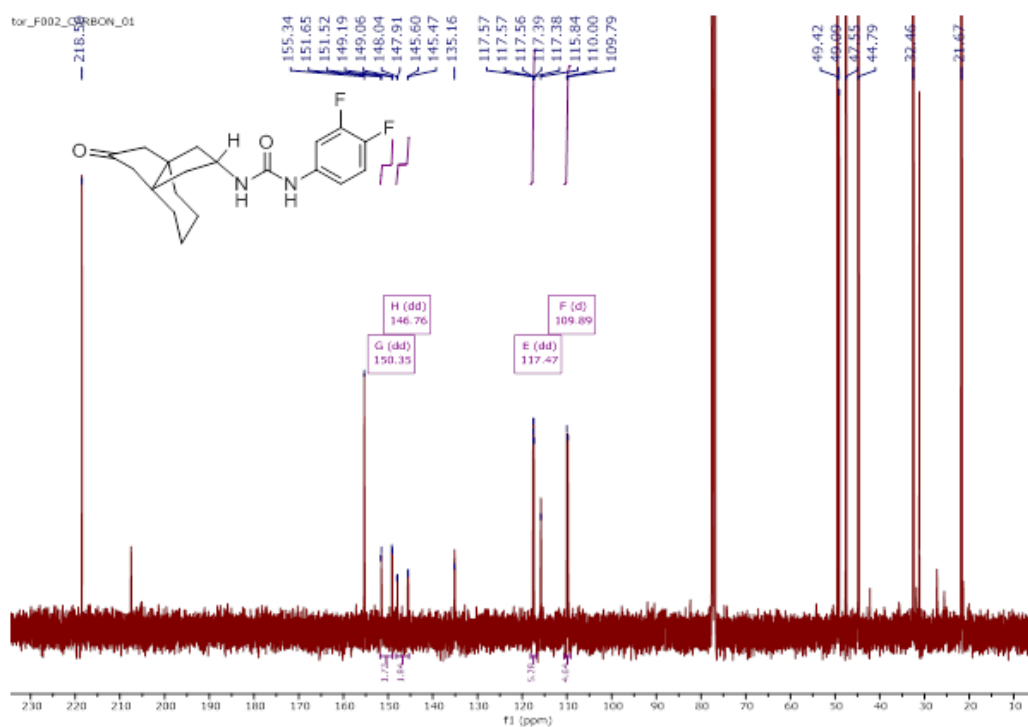

$^1\text{H}$  NMR spectrum of 1-(3,4-Difluorophenyl)-3-(8-*anti*-11-*anti* and 8-*anti*-11-*syn*-11-hydroxy[4.3.3]propellan-8-yl)urea (*syn,syn*-**26** and *syn,anti*-**26**)

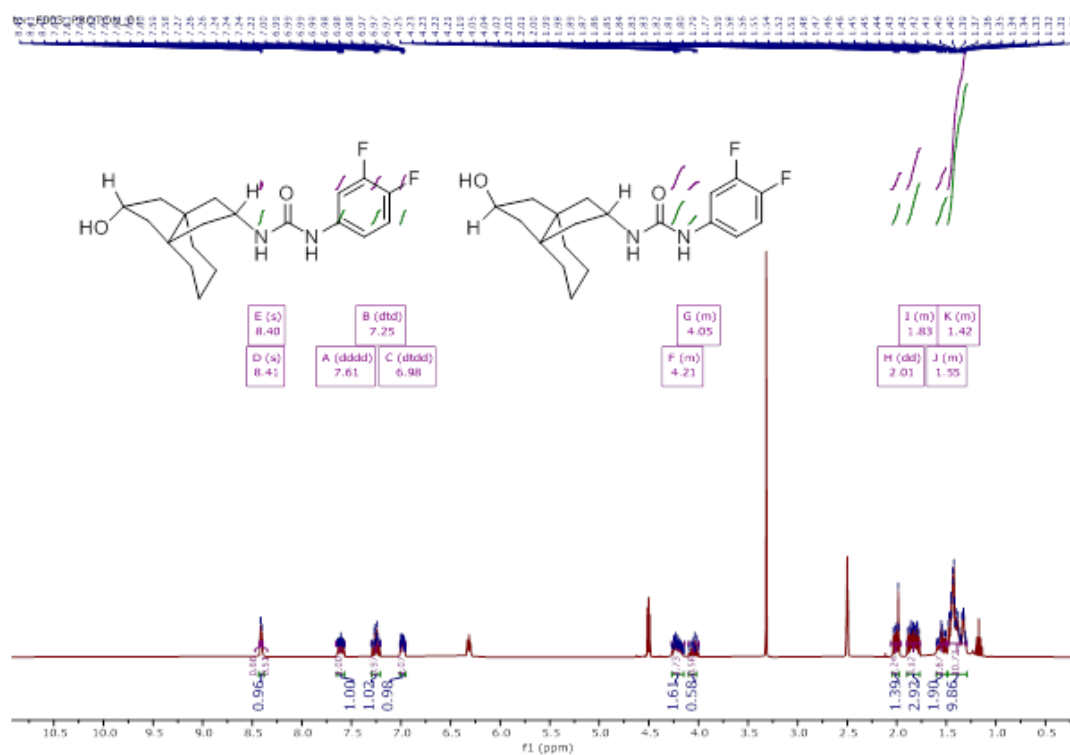

$^{13}\text{C}$  NMR spectrum of 1-(3,4-Difluorophenyl)-3-(8-*anti*-11-*anti* and 8-*anti*-11-*syn*-11-hydroxy[4.3.3]propellan-8-yl)urea (*syn,syn*-**26** and *syn,anti*-**26**)

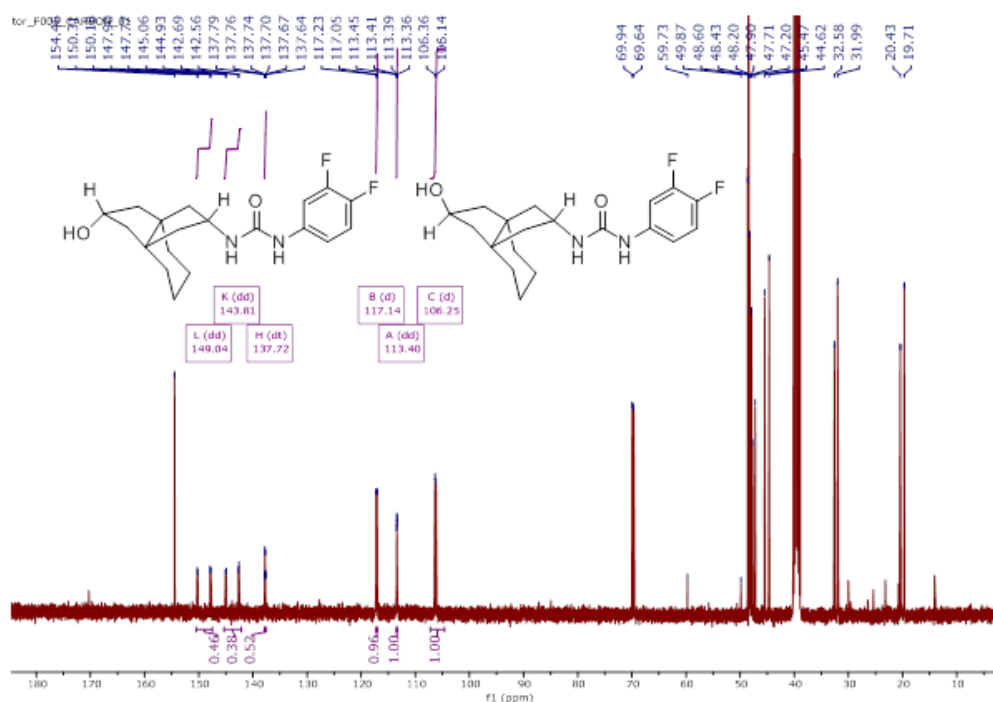

$^1\text{H}$  NMR spectrum of 1-(3,4-Difluorophenyl)-3-(8-*anti*-11-*anti*-hydroxy[4.3.3]propellan-8-yl)urea (*anti,anti*-**26**)

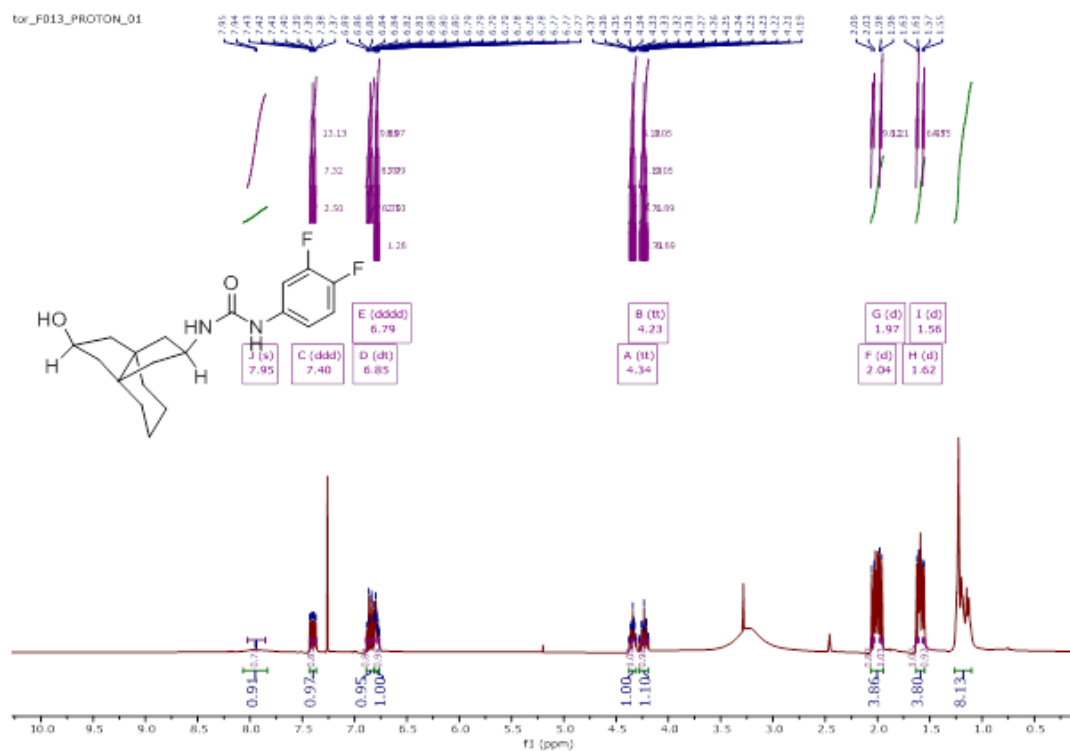

$^{13}\text{C}$  NMR spectrum of 1-(3,4-Difluorophenyl)-3-(8-*anti*-11-*anti*-hydroxy[4.3.3]propellan-8-yl)urea (*anti,anti*-**26**)

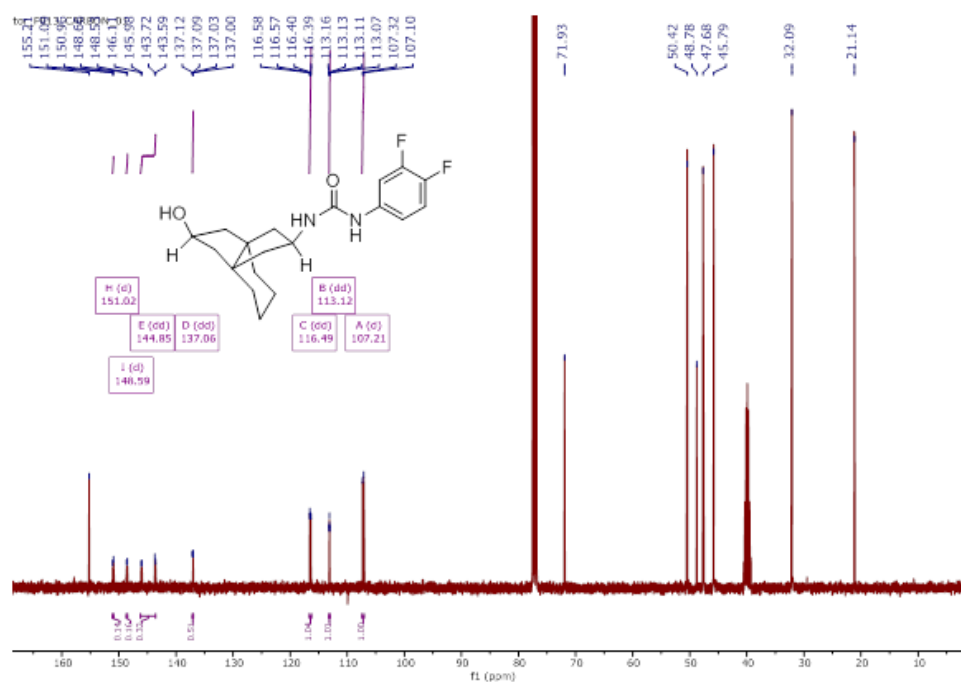

$^1\text{H}$  NMR spectrum of 1-(3,4-Difluorophenyl)-3-(8-*syn*-11-*anti*-hydroxy[4.3.3]propellan-8-yl)urea (*anti,syn*-**26**)

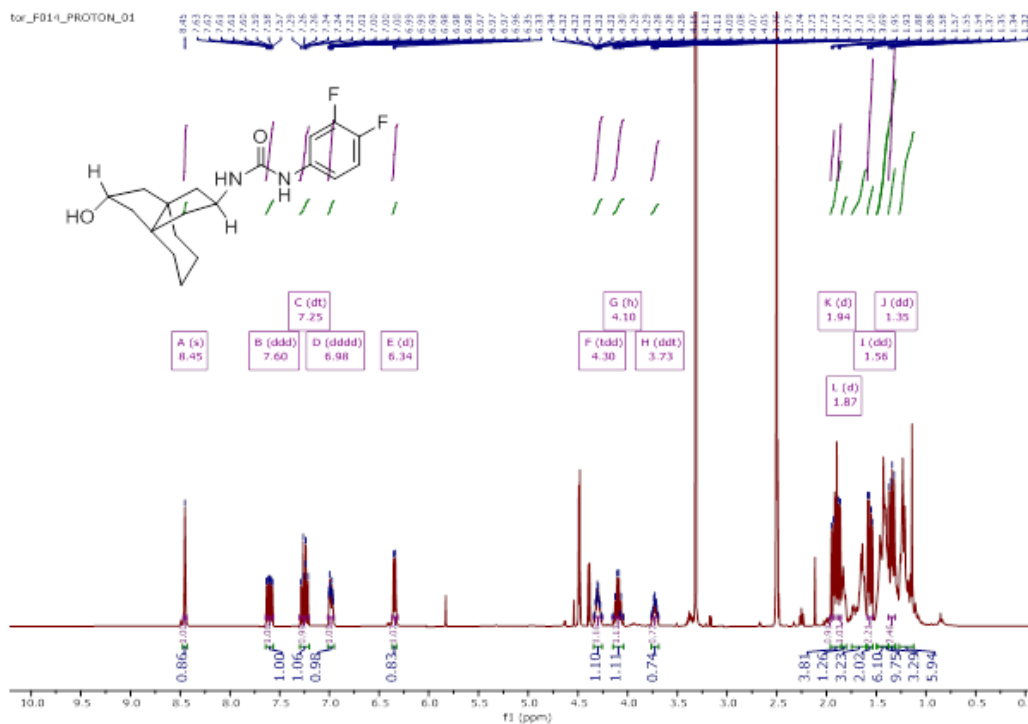

$^{13}\text{C}$  NMR spectrum of 1-(3,4-Difluorophenyl)-3-(8-*syn*-11-*anti*-hydroxy[4.3.3]propellan-8-yl)urea (*anti,syn*-**26**)

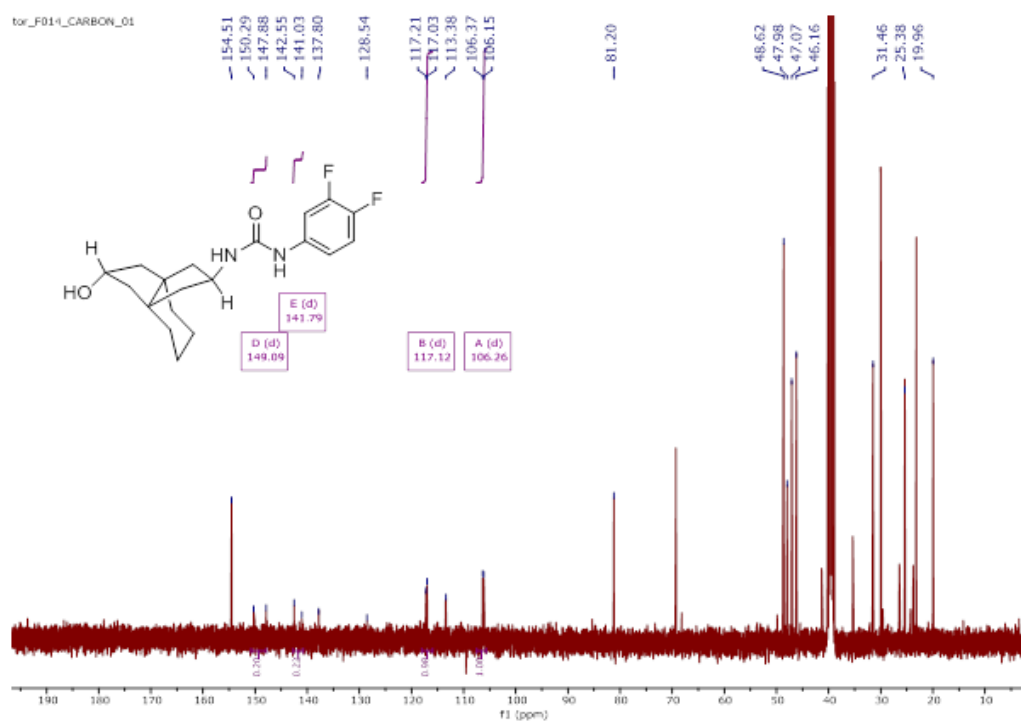

## 6. HPLC traces of selected compounds

HPLC trace of compound 8-syn-4b

## HPLC

Analyzed: 06.12.12 02:40

Reported: 06.12.12 09:27

Processed: 06.12.12 09:27

Data Path: D:\WIN32APP\HSM\Chromni\DATA\5635\

Application: Chromni

Series: 5635

Vial Number: 12

Sample Name: H075

Vial Type: UNK

Injection from this vial: 1 of 1

Volume: 5,0 ul

Chrom Type: HPLC Channel : 1

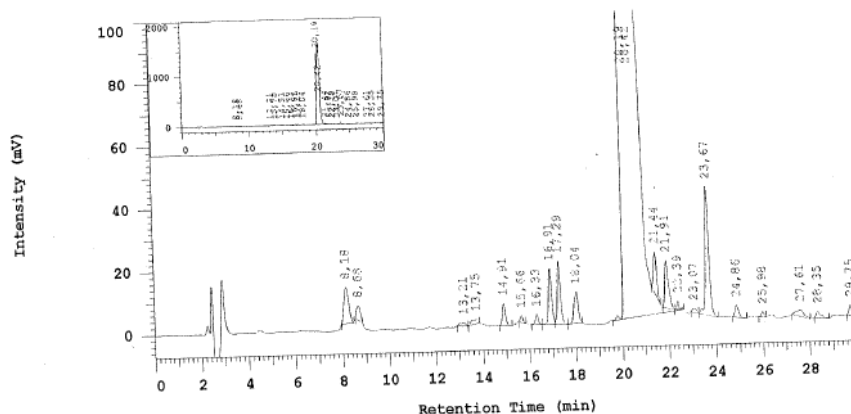

Acquisition Method: Chromni

Blank Subtr Sample Name: ACN

Column Type: 010

Solvent A: Wasser + 0,05%TFA

Developed by: Jens

Solvent B: ACN + 0,05%TFA

| No. | RT    | Area     | Conc 1  | BC  |
|-----|-------|----------|---------|-----|
| 1   | 8,18  | 167488   | 0,380   | BB  |
| 2   | 8,68  | 47540    | 0,108   | BB  |
| 3   | 13,21 | 19128    | 0,043   | BB  |
| 4   | 13,75 | 29455    | 0,067   | BB  |
| 5   | 14,91 | 64447    | 0,146   | BB  |
| 6   | 15,66 | 16481    | 0,037   | BB  |
| 7   | 16,33 | 28292    | 0,064   | BB  |
| 8   | 16,91 | 166523   | 0,378   | BB  |
| 9   | 17,29 | 190380   | 0,432   | BB  |
| 10  | 18,04 | 124935   | 0,283   | BB  |
| 11  | 20,19 | 15227707 | 34,536  | BV  |
| 12  | 20,42 | 27117286 | 61,502  | VV  |
| 13  | 21,44 | 113499   | 0,257   | TBB |
| 14  | 21,91 | 169265   | 0,384   | TBB |
| 15  | 22,39 | 18265    | 0,041   | TBB |
| 16  | 23,07 | 15775    | 0,036   | BB  |
| 17  | 23,67 | 417630   | 0,947   | BB  |
| 18  | 24,86 | 41053    | 0,093   | BB  |
| 19  | 25,98 | 11097    | 0,025   | BB  |
| 20  | 27,61 | 49011    | 0,111   | BB  |
| 21  | 28,35 | 26349    | 0,060   | BB  |
| 22  | 29,75 | 30084    | 0,068   | BB  |
|     |       | 44091690 | 100,000 |     |

Peak rejection level: 0

HPLC trace of compound 8-*anti*-4g

## HPLC

Analyzed: 17.07.13 22:25

Reported: 18.07.13 09:37

Processed: 18.07.13 09:37

Data Path: D:\WIN32APP\HSM\Jens\DATA\2299\

Application: Jens

Series: 2299

Vial Number: 8

**Sample Name: H091**

Vial Type: UNK

Injection from this vial: 1 of 1

Volume: 5,0 ul

Chrom Type: HPLC Channel : 1

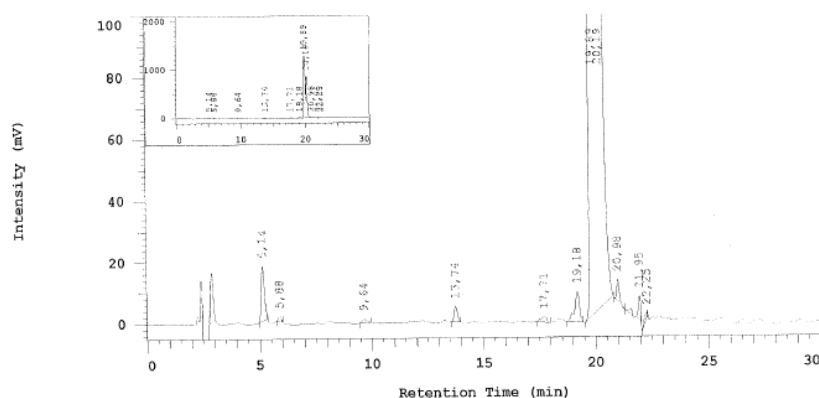

Acquisition Method: Chromni

Blank Subtr Sample Name: ACN

Column Type: 010

Developed by: Jens

Solvent A: Wasser + 0,05%TFA

Solvent B: ACN + 0,05%TFA

| No. | RT    | Area     | Conc 1  | BC |
|-----|-------|----------|---------|----|
| 1   | 5,14  | 172756   | 0,637   | BB |
| 2   | 5,88  | 13001    | 0,048   | MC |
| 3   | 9,64  | 15322    | 0,057   | MC |
| 4   | 13,74 | 48150    | 0,178   | BB |
| 5   | 17,71 | 28556    | 0,105   | BB |
| 6   | 19,18 | 142071   | 0,524   | MC |
| 7   | 19,89 | 16017075 | 59,072  | MC |
| 8   | 20,19 | 10542464 | 38,881  | MC |
| 9   | 20,98 | 60440    | 0,223   | MC |
| 10  | 21,95 | 56304    | 0,208   | MC |
| 11  | 22,25 | 18535    | 0,068   | MC |
|     |       | 27114674 | 100,000 |    |

Peak rejection level: 0

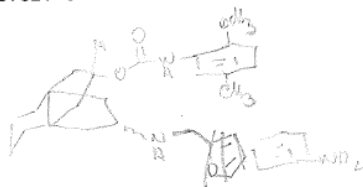

97,95



S137

# HPLC trace of compound 8-anti-4i

## HPLC

Analyzed: 23.10.13 23:41

Reported: 24.10.13 10:19  
Processed: 24.10.13 10:19

Data Path: D:\WIN32APP\HSM\Kirstin\DATA\0191\

Application: Kirstin

Sample Name: H100

Injection from this vial: 1 of 1

Series: 0191

Vial Number: 10

Vial Type: UNK

Volume: 5,0 ul

Chrom Type: HPLC Channel : 1

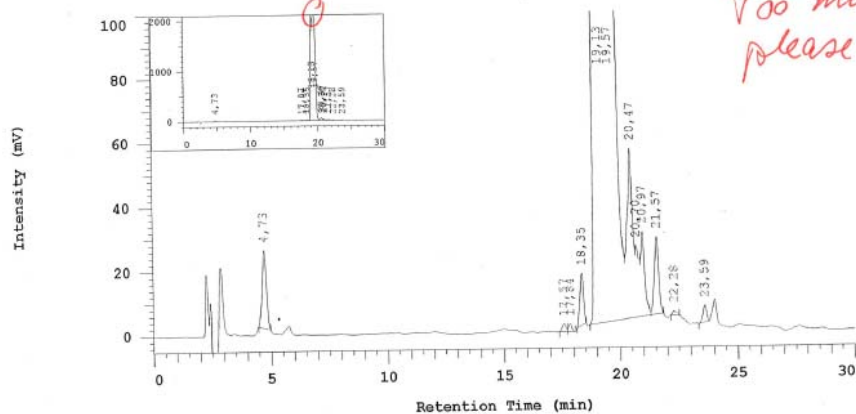

Acquisition Method: Chromni

Blank Subtr Sample Name: ACN

Column Type: 010

Solvent A: Wasser + 0,05%TFA

Developed by: Jens

Solvent B: ACN + 0,05%TFA

| No. | RT    | Area     | Conc 1  | BC |
|-----|-------|----------|---------|----|
| 1   | 4,73  | 303242   | 0,316   | BB |
| 2   | 17,57 | 25144    | 0,026   | BB |
| 3   | 17,84 | 24191    | 0,025   | BB |
| 4   | 18,35 | 170387   | 0,177   | MC |
| 5   | 19,13 | 40504000 | 42,154  | MC |
| 6   | 19,57 | 53234374 | 55,403  | MC |
| 7   | 20,47 | 887475   | 0,924   | MC |
| 8   | 20,70 | 248082   | 0,258   | MC |
| 9   | 20,97 | 320438   | 0,333   | MC |
| 10  | 21,57 | 300676   | 0,313   | MC |
| 11  | 22,28 | 14774    | 0,015   | BB |
| 12  | 23,59 | 52828    | 0,055   | MC |
|     |       | 96085611 | 100,000 |    |

Peak rejection level: 0

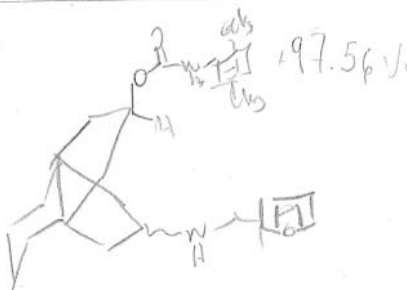

HPLC trace of compound 8-*anti*-4k

## HPLC

Analyzed: 17.10.13 07:38

Reported: 18.10.13 10:29

Processed: 18.10.13 10:29

Data Path: D:\WIN32APP\HSM\Kirstin\DATA\0150\

Application: Kirstin

Series: 0150

Sample Name: H101

Vial Number: 19

Injection from this vial: 1 of 1

Vial Type: UNK

Volume: 5,0 ul

Chrom Type: HPLC Channel : 1

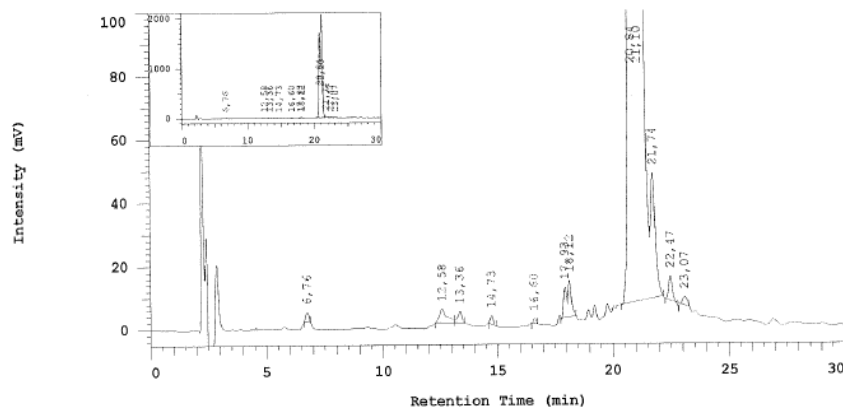

Acquisition Method: Chromni

Blank Subtr Sample Name: ACN

Column Type: 010

Developed by: Jens

Solvent A: Wasser + 0,05%TFA

Solvent B: ACN + 0,05%TFA

| No. | RT    | Area     | Conc 1  | BC |
|-----|-------|----------|---------|----|
| 1   | 6,76  | 25202    | 0,051   | BB |
| 2   | 12,58 | 95955    | 0,195   | MC |
| 3   | 13,36 | 45187    | 0,092   | MC |
| 4   | 14,73 | 24192    | 0,049   | BB |
| 5   | 16,60 | 11643    | 0,024   | BB |
| 6   | 17,93 | 80493    | 0,164   | MC |
| 7   | 18,12 | 119871   | 0,244   | MC |
| 8   | 20,84 | 18454134 | 37,574  | MC |
| 9   | 21,10 | 29586668 | 60,241  | MC |
| 10  | 21,74 | 567181   | 1,155   | MC |
| 11  | 22,47 | 74143    | 0,151   | MC |
| 12  | 23,07 | 29453    | 0,060   | MC |
|     |       | 49114122 | 100,000 |    |

Peak rejection level: 0

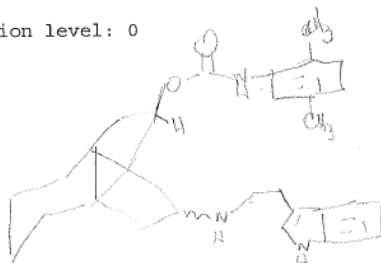

HPLC trace of compound 8-*anti*-4m

## HPLC

Analyzed: 06.12.12 05:26

Reported: 06.12.12 09:30  
Processed: 06.12.12 09:30Data Path: D:\WIN32APP\HSM\Chromni\DATA\5639\  
Application: ChromniSeries: 5639  
Vial Number: 15  
Vial Type: UNK  
Volume: 5,0 ul

Sample Name: H078

Injection from this vial: 1 of 1

Chrom Type: HPLC Channel : 1

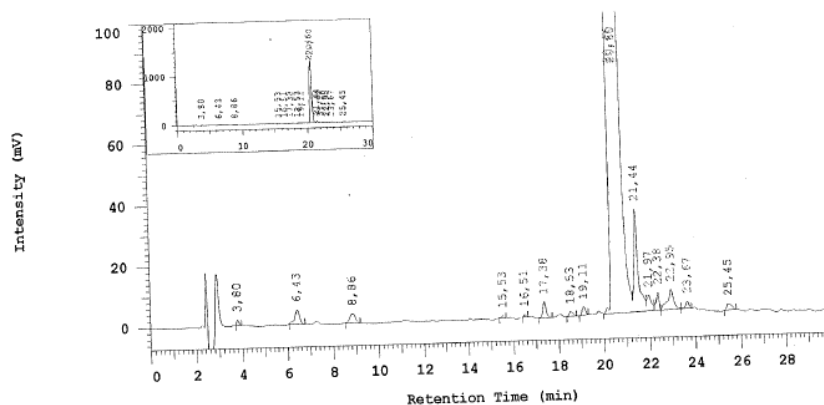

Acquisition Method: Chromni

Blank Subtr Sample Name: ACN

Column Type: 010

Developed by: Jens

Solvent A: Wasser + 0,05%TFA

Solvent B: ACN + 0,05%TFA

| No. | RT    | Area     | Conc 1  | BC |
|-----|-------|----------|---------|----|
| 1   | 3,80  | 11406    | 0,042   | MC |
| 2   | 6,43  | 66165    | 0,246   | MC |
| 3   | 8,86  | 50747    | 0,189   | MC |
| 4   | 15,53 | 6796     | 0,025   | BB |
| 5   | 16,51 | 5637     | 0,021   | BB |
| 6   | 17,38 | 53090    | 0,198   | BB |
| 7   | 18,53 | 18974    | 0,071   | MC |
| 8   | 19,11 | 25775    | 0,096   | BB |
| 9   | 20,46 | 8725114  | 32,487  | BV |
| 10  | 20,60 | 17157504 | 63,884  | VV |
| 11  | 21,44 | 436720   | 1,626   | MC |
| 12  | 21,97 | 69968    | 0,261   | MC |
| 13  | 22,38 | 54590    | 0,203   | MC |
| 14  | 22,95 | 121222   | 0,451   | BB |
| 15  | 23,67 | 22101    | 0,082   | BB |
| 16  | 25,45 | 31662    | 0,118   | MC |
|     |       | 26857471 | 100,000 |    |

Peak rejection level: 0

S140

# HPLC trace of compound 8-anti-4q

## HPLC

Analyzed: 06.12.12 06:49

Reported: 06.12.12 09:17

Processed: 06.12.12 09:17

Data Path: D:\WIN32APP\HSM\Chromni\DATA\5641\

Application: Chromni

Sample Name: H080

Injection from this vial: 1 of 1

Series: 5641

Vial Number: 17

Vial Type: UNK

Volume: 5,0 ul

Chrom Type: HPLC Channel : 1

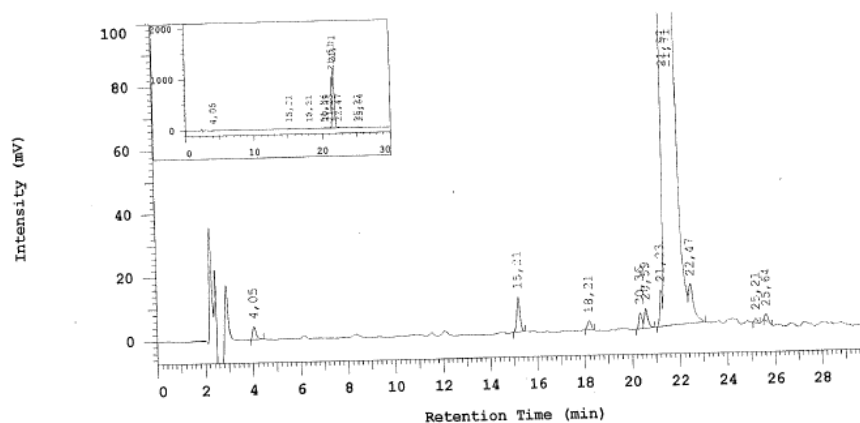

Acquisition Method: Chromni

Blank Subtr Sample Name: ACN

Column Type: 010

Solvent A: Wasser + 0,05%TFA

Developed by: Jens

Solvent B: ACN + 0,05%TFA

| No. | RT    | Area     | Conc 1  | BC |
|-----|-------|----------|---------|----|
| 1   | 4,05  | 37783    | 0,137   | MC |
| 2   | 15,21 | 106818   | 0,387   | BB |
| 3   | 18,21 | 26273    | 0,095   | BB |
| 4   | 20,36 | 41397    | 0,150   | BV |
| 5   | 20,59 | 60919    | 0,221   | VB |
| 6   | 21,23 | 84258    | 0,305   | MC |
| 7   | 21,51 | 9791134  | 35,467  | MC |
| 8   | 21,71 | 17237033 | 62,439  | MC |
| 9   | 22,47 | 189073   | 0,685   | MC |
| 10  | 25,21 | 11595    | 0,042   | BB |
| 11  | 25,64 | 19986    | 0,072   | BB |
|     |       | 27606269 | 100,000 |    |

Peak rejection level: 0

S141

## HPLC trace of compound 11-syn-13

## HPLC

Analyzed: 26.07.13 01:53

Reported: 26.07.13 09:32

Processed: 26.07.13 09:31

Data Path: D:\WIN32APP\HSM\Jens\DATA\2346\

Application: Jens

Series: 2346

Sample Name: M001

Vial Number: 12

Injection from this vial: 1 of 1

Vial Type: UNK

Volume: 5,0 ul

Chrom Type: HPLC Channel : 1

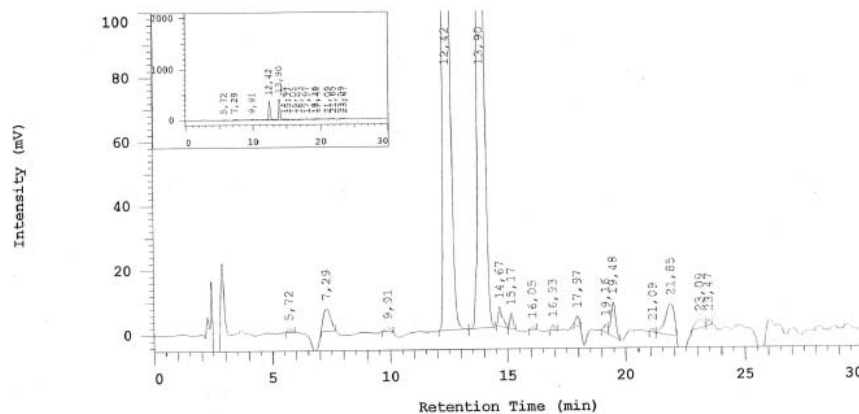

Acquisition Method: Chromni

Blank Subtr Sample Name: ACN

Column Type: 010

Developed by: Jens

Solvent A: Wasser + 0,05%TFA

Solvent B: ACN + 0,05%TFA

| No. | RT    | Area     | Conc 1  | BC |
|-----|-------|----------|---------|----|
| 1   | 5,72  | 10845    | 0,089   | BB |
| 2   | 7,29  | 147149   | 1,206   | MC |
| 3   | 9,91  | 21413    | 0,175   | BB |
| 4   | 12,42 | 5586298  | 45,784  | MC |
| 5   | 13,90 | 5771912  | 47,305  | MC |
| 6   | 14,67 | 69230    | 0,567   | MC |
| 7   | 15,17 | 35812    | 0,294   | MC |
| 8   | 16,05 | 10100    | 0,083   | BB |
| 9   | 16,93 | 13708    | 0,112   | BB |
| 10  | 17,97 | 29050    | 0,238   | MC |
| 11  | 19,16 | 27861    | 0,228   | MC |
| 12  | 19,48 | 140728   | 1,153   | MC |
| 13  | 21,09 | 9830     | 0,081   | MC |
| 14  | 21,85 | 247715   | 2,030   | MC |
| 15  | 23,09 | 62696    | 0,514   | MC |
| 16  | 23,47 | 17063    | 0,140   | MC |
|     |       | 12201410 | 100,000 |    |

Peak rejection level: 0

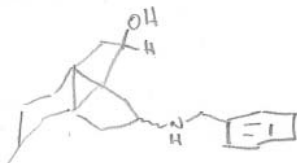

93.09

S142

HPLC trace of compound *anti*-14

## HPLC

Analyzed: 18.07.13 01:11

Reported: 18.07.13 09:43

Processed: 18.07.13 09:43

Data Path: D:\WIN32APP\HSM\Jens\DATA\2303\

Application: Jens

Sample Name: KBn2

Injection from this vial: 1 of 1

Series:2303

Vial Number: 11

Vial Type: UNK

Volume: 5,0 ul

Chrom Type: HPLC Channel : 1

*not enough*

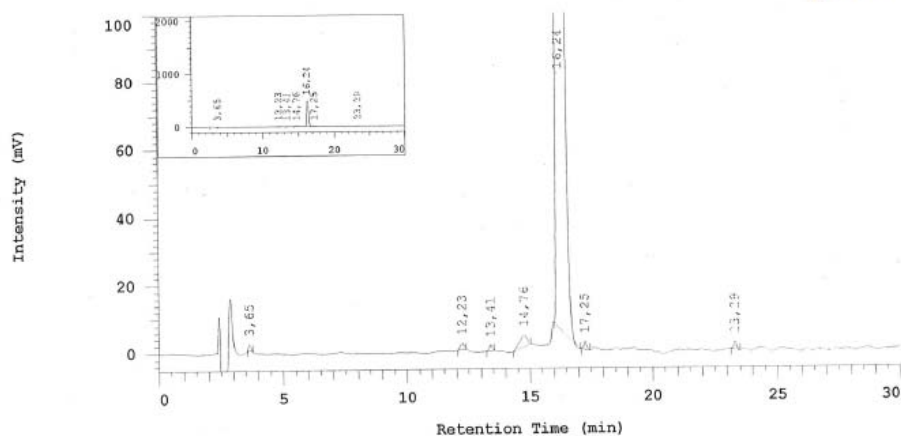

Acquisition Method: Chromni

Blank Subtr Sample Name: ACN

Column Type: 010

Solvent A: Wasser + 0,05%TFA

Developed by: Jens

Solvent B: ACN + 0,05%TFA

| No. | RT    | Area    | Conc 1  | BC |
|-----|-------|---------|---------|----|
| 1   | 3,65  | 12763   | 0,146   | MC |
| 2   | 12,23 | 19312   | 0,221   | MC |
| 3   | 13,41 | 13426   | 0,154   | BB |
| 4   | 14,76 | 74151   | 0,848   | BB |
| 5   | 16,24 | 8590286 | 98,236  | MC |
| 6   | 17,25 | 18678   | 0,214   | MC |
| 7   | 23,29 | 15913   | 0,182   | BB |
|     |       | 8744529 | 100,000 |    |

Peak rejection level: 0

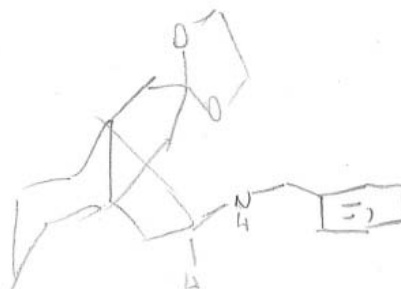

S143

# HPLC trace of compound 15

## HPLC

Analyzed: 08.08.13 20:54

Reported: 09.08.13 08:59

Processed: 09.08.13 08:59

Data Path: D:\WIN32APP\HSM\Jens\DATA\2488\

Application: Jens

Series:2488

Sample Name: PA11

Vial Number: 11

Injection from this vial: 1 of 1

Vial Type: UNK

Volume: 5,0 ul

Chrom Type: HPLC Channel : 1

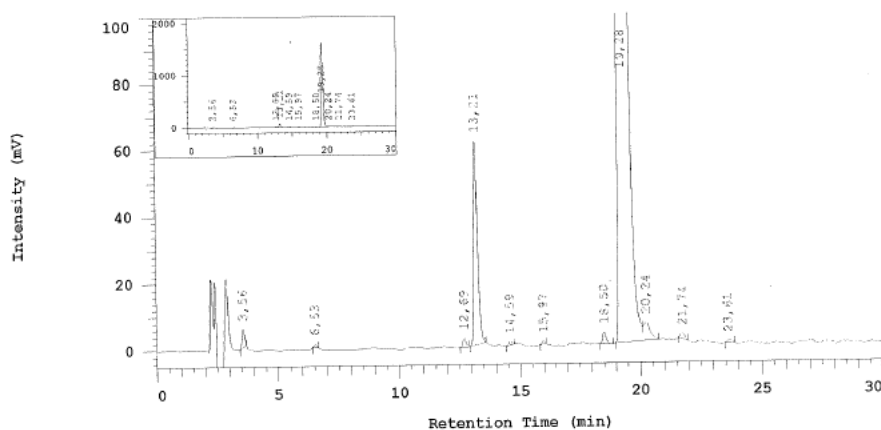

Acquisition Method: Chromni

Blank Subtr Sample Name: ACN

Column Type: 010

Developed by: Jens

Solvent A: Wasser + 0,05%TFA

Solvent B: ACN + 0,05%TFA

| No. | RT    | Area     | Conc 1  | BC |
|-----|-------|----------|---------|----|
| 1   | 3,56  | 37016    | 0,134   | BB |
| 2   | 6,53  | 8309     | 0,030   | BB |
| 3   | 12,69 | 24205    | 0,088   | BB |
| 4   | 13,21 | 636001   | 2,301   | BB |
| 5   | 14,59 | 8386     | 0,030   | BB |
| 6   | 15,97 | 6930     | 0,025   | BB |
| 7   | 18,50 | 34141    | 0,124   | BB |
| 8   | 19,28 | 26754505 | 96,792  | MC |
| 9   | 20,24 | 102526   | 0,371   | MC |
| 10  | 21,74 | 18825    | 0,068   | BB |
| 11  | 23,61 | 10324    | 0,037   | BB |
|     |       | 27641168 | 100,000 |    |

Peak rejection level: 0

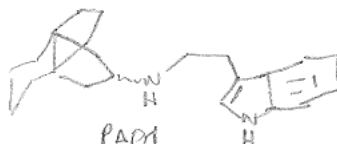

S144

# HPLC trace of compound 17

## HPLC

Analyzed: 08.08.13 18:08

Reported: 09.08.13 08:54  
Processed: 09.08.13 08:54

Data Path: D:\WIN32APP\HSM\Jens\DATA\2484\

Application: Jens

Sample Name: PA02

Injection from this vial: 1 of 1

Series:2484

Vial Number: 8

Vial Type: UNK

Volume: 5,0 ul

Chrom Type: HPLC Channel : 1

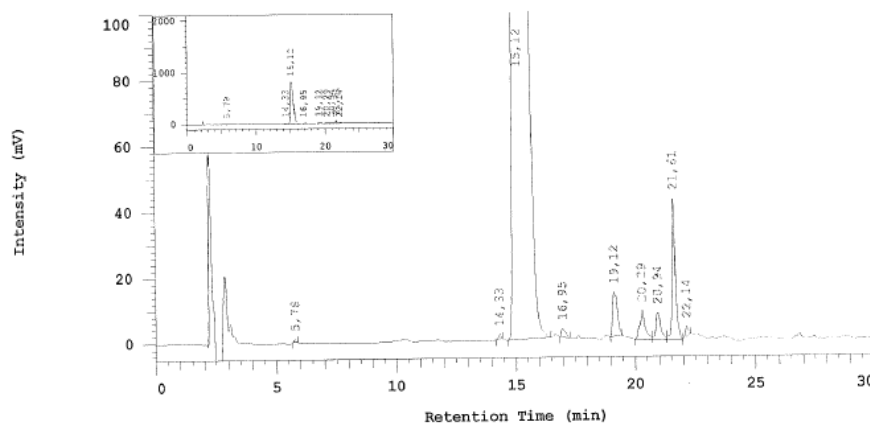

Acquisition Method: Chromni

Blank Subtr Sample Name: ACN

Column Type: 010

Solvent A: Wasser + 0,05%TFA

Developed by: Jens

Solvent B: ACN + 0,05%TFA

| No. | RT    | Area     | Conc 1  | BC |
|-----|-------|----------|---------|----|
| 1   | 5,78  | 4678     | 0,020   | BB |
| 2   | 14,33 | 10069    | 0,043   | BB |
| 3   | 15,12 | 22739411 | 96,145  | BB |
| 4   | 16,95 | 32452    | 0,137   | MC |
| 5   | 19,12 | 185275   | 0,783   | MC |
| 6   | 20,29 | 132846   | 0,562   | BB |
| 7   | 20,94 | 110080   | 0,465   | BB |
| 8   | 21,61 | 410747   | 1,737   | BB |
| 9   | 22,14 | 25659    | 0,108   | BB |
|     |       | 23651217 | 100,000 |    |

Peak rejection level: 0

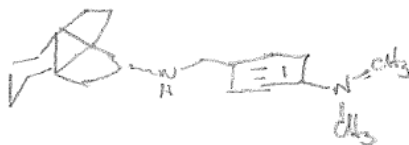



S145

## HPLC trace of compound 18

Data File: C:\CHEM32\1\DATA\SEQUENZEN\2013\_10\_25 2013-10-25 14-02-52\MSD1.D  
Sample Name: PA06-Hector

=====

|                 |                                                                                     |            |            |
|-----------------|-------------------------------------------------------------------------------------|------------|------------|
| Acq. Operator   | : SYSTEM                                                                            | Seq. Line  | : 5        |
| Acq. Instrument | : LCMS                                                                              | Location   | : P1-B-04  |
| Injection Date  | : 25-Oct-13 14:54:38                                                                | Inj        | : 1        |
|                 |                                                                                     | Inj Volume | : 1.000 µl |
| Acq. Method     | : C:\CHEM32\1\DATA\SEQUENZEN\2013_10_25 2013-10-25 14-02-52\ROUTINE_12MIN_POSITIV.M |            |            |
| Last changed    | : 25-Oct-13 14:02:52 by SYSTEM                                                      |            |            |
| Analysis Method | : C:\CHEM32\1\METHODS\ROUTINE_12MIN_POSITIV.M                                       |            |            |
| Last changed    | : 25-Oct-13 15:32:26 by SYSTEM                                                      |            |            |
| Method Info     | : Gradient und Fragmentor 100                                                       |            |            |

Additional Info : Peak(s) manually integrated

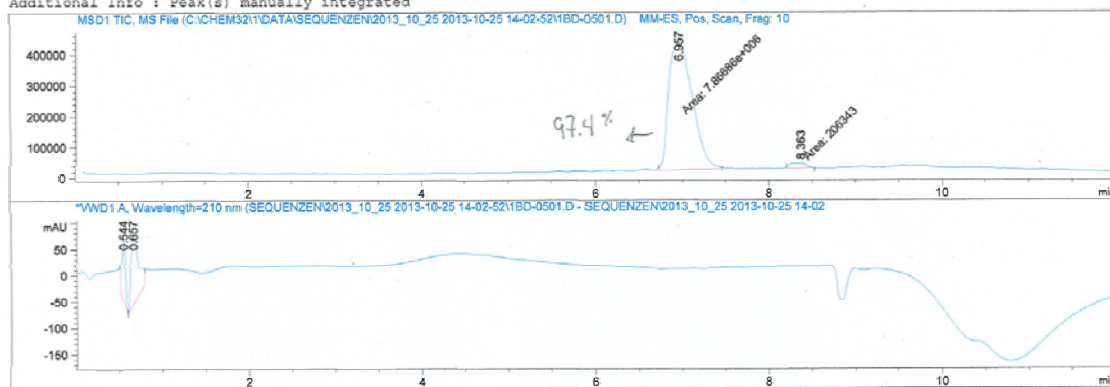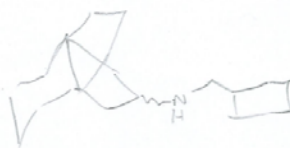

S146

HPLC trace of compound *anti-anti-22*

## HPLC

Analyzed: 27.06.12 21:53

Reported: 28.06.12 11:05  
Processed: 28.06.12 11:05

Data Path: D:\WIN32APP\HSM\Chromni\DATA\4938\

Application: Chromni

**Sample Name: H064**

Injection from this vial: 1 of 1

Series:4938

Vial Number: 6

Vial Type: UNK

Volume: 5,0 ul

Chrom Type: HPLC Channel : 1

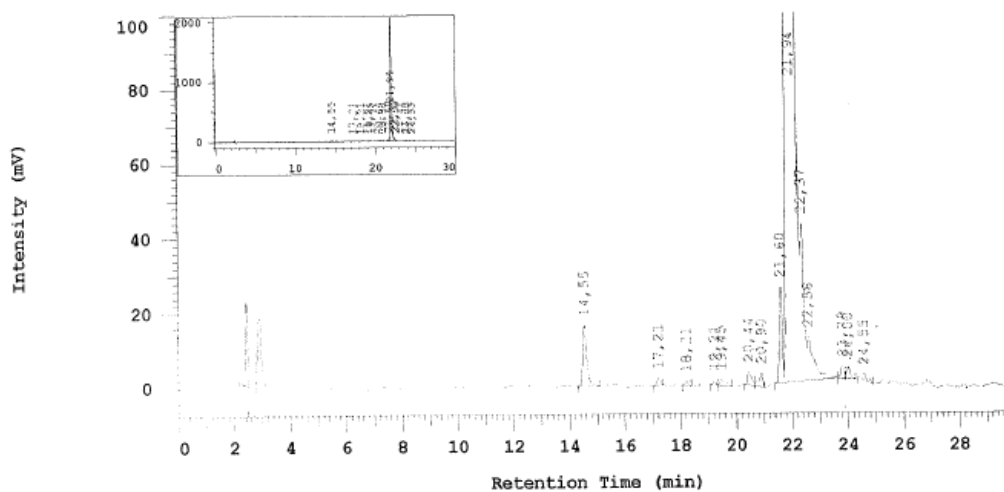

Acquisition Method: Chromni

Blank Subtr Sample Name: ACN

Column Type: 010

Solvent A: Wasser + 0,05%TFA

Developed by: Jens

Solvent B: ACN + 0,05%TFA

| No. | RT    | Area     | Conc 1  | BC |
|-----|-------|----------|---------|----|
| 1   | 14,55 | 165909   | 0,656   | MC |
| 2   | 17,21 | 15061    | 0,060   | BB |
| 3   | 18,21 | 8192     | 0,032   | BB |
| 4   | 19,21 | 8637     | 0,034   | BB |
| 5   | 19,45 | 26641    | 0,105   | MC |
| 6   | 20,44 | 39225    | 0,155   | BV |
| 7   | 20,90 | 38025    | 0,150   | VB |
| 8   | 21,60 | 191308   | 0,756   | MC |
| 9   | 21,94 | 24174628 | 95,527  | MC |
| 10  | 22,37 | 349719   | 1,382   | MC |
| 11  | 22,58 | 211391   | 0,835   | MC |
| 12  | 23,79 | 24873    | 0,098   | BV |
| 13  | 24,00 | 29060    | 0,115   | VB |
| 14  | 24,55 | 23875    | 0,094   | BB |
|     |       | 25306544 | 100,000 |    |

Peak rejection level: 0

S147

HPLC trace of compound **23a**

## HPLC

Analyzed: 31.10.13 03:46

Reported: 31.10.13 14:17

Processed: 31.10.13 14:17

Data Path: D:\WIN32APP\HSM\Kirstin\DATA\0216\

Application: Kirstin

Series: 0216

**Sample Name: T12N**

Vial Number: 15

Injection from this vial: 1 of 1

Vial Type: UNK

Volume: 5,0 ul

Chrom Type: HPLC Channel : 1

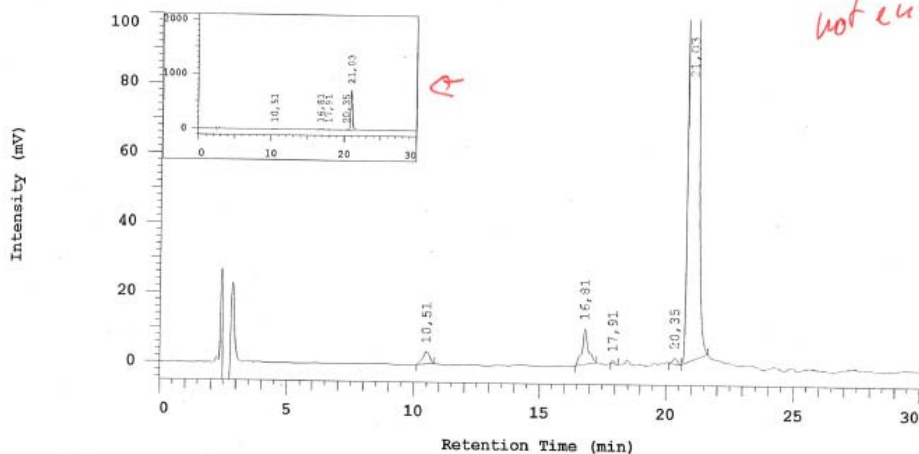

Acquisition Method: Chromni

Blank Subtr Sample Name: ACN

Column Type: 010

Solvent A: Wasser + 0,05%TFA

Developed by: Jens

Solvent B: ACN + 0,05%TFA

| No. | RT    | Area    | Conc 1  | BC |
|-----|-------|---------|---------|----|
| 1   | 10,51 | 64315   | 0,643   | MC |
| 2   | 16,81 | 167459  | 1,675   | MC |
| 3   | 17,91 | 6878    | 0,069   | BB |
| 4   | 20,35 | 20935   | 0,209   | MC |
| 5   | 21,03 | 9739804 | 97,404  | BB |
|     |       | 9999391 | 100,000 |    |

Peak rejection level: 0

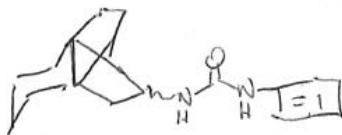

HPLC trace of compound **23d**

## HPLC

Analyzed: 08.08.13 07:01

Reported: 08.08.13 10:37

Processed: 08.08.13 10:37

Data Path: D:\WIN32APP\HSM\Jens\DATA\2470\

Application: Jens

Series: 2470

**Sample Name: T015**

Vial Number: 20

Injection from this vial: 1 of 1

Vial Type: UNK

Volume: 5,0 ul

Chrom Type: HPLC Channel : 1

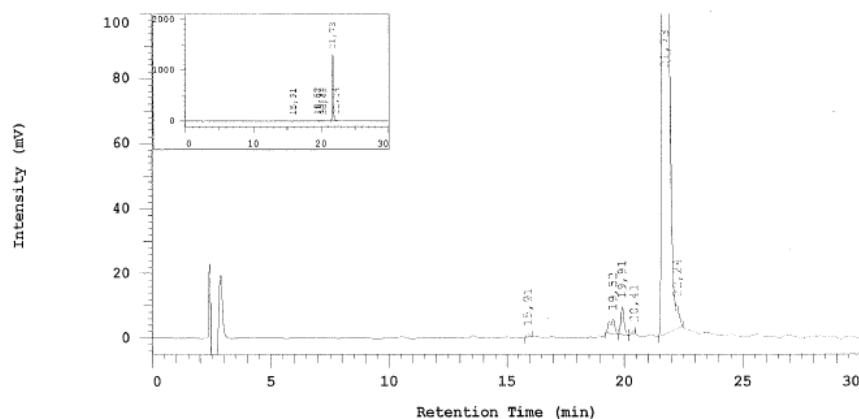

Acquisition Method: Chromni

Blank Subtr Sample Name: ACN

Column Type: 010

Developed by: Jens

Solvent A: Wasser + 0,05%TFA

Solvent B: ACN + 0,05%TFA

| No. | RT    | Area     | Conc 1  | BC |
|-----|-------|----------|---------|----|
| 1   | 15,91 | 7978     | 0,060   | BB |
| 2   | 19,52 | 68577    | 0,514   | MC |
| 3   | 19,91 | 73792    | 0,553   | MC |
| 4   | 20,41 | 7376     | 0,055   | BB |
| 5   | 21,73 | 13110874 | 98,245  | BV |
| 6   | 22,24 | 76482    | 0,573   | MC |
|     |       | 13345079 | 100,000 |    |

Peak rejection level: 0

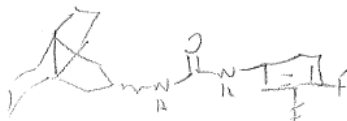

S149

# HPLC trace of compound *anti-25*

## HPLC

Analyzed: 12.09.13 04:11

Reported: 12.09.13 11:19

Processed: 12.09.13 11:19

Data Path: D:\WIN32APP\HSM\Jens\DATA\2747\

Application: Jens

Series:2747

Sample Name: F002

Vial Number: 14

Injection from this vial: 1 of 1

Vial Type: UNK

Volume: 5,0 ul

Chrom Type: HPLC Channel : 1

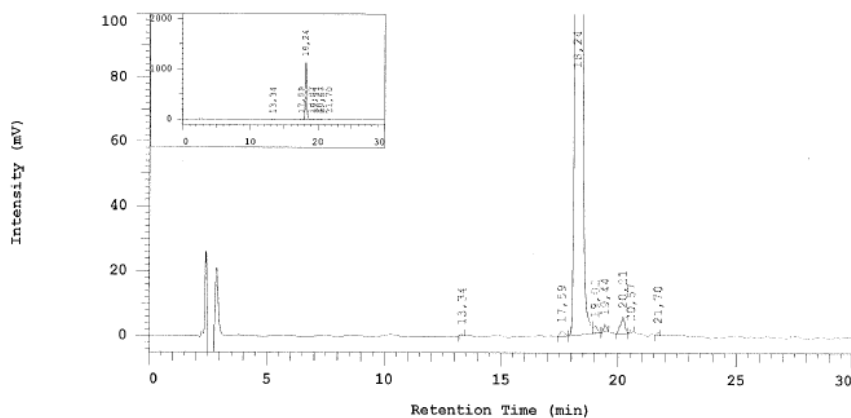

Acquisition Method: Chromni

Blank Subtr Sample Name: ACN

Column Type: 010

Developed by: Jens

Solvent A: Wasser + 0,05%TFA

Solvent B: ACN + 0,05%TFA

| No. | RT    | Area     | Conc 1  | BC |
|-----|-------|----------|---------|----|
| 1   | 13,34 | 5990     | 0,050   | BB |
| 2   | 17,59 | 19864    | 0,165   | BB |
| 3   | 18,24 | 11921338 | 98,743  | BV |
| 4   | 19,02 | 27056    | 0,224   | MC |
| 5   | 19,44 | 20297    | 0,168   | BB |
| 6   | 20,21 | 65800    | 0,545   | BB |
| 7   | 20,57 | 5769     | 0,048   | BB |
| 8   | 21,70 | 7024     | 0,058   | BB |
|     |       | 12073138 | 100,000 |    |

Peak rejection level: 0

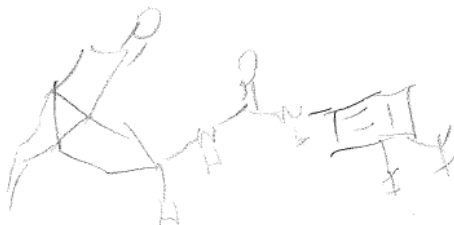

Supplement: s1 [file s1]
